# Supplementary material for: Preconditioning in the Rhesus Macaque Induces a Proteomic Signature Following Cerebral Ischemia that Is Associated with Neuroprotection
Source: Springer Nature journal article supplement (doi:10.1007/s12975-018-0670-7), 2018-10-19
Supplement: MOESM3 [file 16212868]

## Sheet: Peptides
Title: Preconditioning in the rhesus macaque induces a proteomic signature following cerebral ischemia that is associated with neuroprotection.
Journal: Translational Stroke Research
Authors: Susan L Stevens, Tao Liu, Frances Rena Bahjat, Vladislav A. Petyuk, Athena A. Schepmoes, Ryan L. Sontag, Marina A. Gritsenko, Chaochao Wu, Sheng Wang,
Anil K. Shukla, Jon M. Jacobs, Richard D. Smith, Karin D. Rodland, G. Alexander West, Steven G. Kohama, Christine Glynn, Mary P. Stenzel-Poore
Corresponding Author: Dr. Mary Stenzel-Poore; Department of Molecular Microbiology and Immunology, Oregon Health & Science University, Portland, Oregon, USA; E-mail: poorem@ohsu.edu
Supplementary Table 2: Peptides and the corresponding proteins identified in the CSF.
Protein	Peptide
sp|A1C2U6|GDF8_MACMU	K.ALDENGHDLAVTFPGPGEDGLNPFLEVK.V
sp|A1C2U6|GDF8_MACMU	K.QPESNLGIEIK.A
sp|A1C2U6|GDF8_MACMU	K.TVLQNWLK.Q
sp|A1E2I4|MX1_MACMU	R.DVPDLTLIDLPGITR.V
sp|A1YL67|ASIP_MACMU	K.EASM*KKVAR.P
sp|A3RFZ7|FCGR3_MACMU	K.AVVFLEPQWYR.V
sp|A3RFZ7|FCGR3_MACMU	K.DSGSYFCR.G
sp|A8T666|PCSK9_MACMU	K.DVINEAWFPEDQR.V
sp|A8T666|PCSK9_MACMU	Q.SIPWNLER.I
sp|A8T666|PCSK9_MACMU	R.AGWQLFCR.T
sp|A8T666|PCSK9_MACMU	R.AHNAFGGEGVYA.I
sp|A8T666|PCSK9_MACMU	R.AHNAFGGEGVYAIAR.C
sp|A8T666|PCSK9_MACMU	R.CVDLFAPGEDIIGASSDCSTCFVSR.S
sp|A8T666|PCSK9_MACMU	R.GQPNQCVGHR.E
sp|A8T666|PCSK9_MACMU	R.MATAVAR.C
sp|A8T666|PCSK9_MACMU	R.VFNAACQR.L
sp|A8T666|PCSK9_MACMU	R.VM*VTDFESVPEEDGTR.F
sp|A8T666|PCSK9_MACMU	R.VMVTDFESVPEEDGTR.F
sp|A8T666|PCSK9_MACMU	S.ERTARRLQAQAAR.R
sp|B0FPE9|NALP3_MACMU	Y.LSRISICKKKKDYCK.K
sp|B3Y618|TLR2_MACMU	K.SLEYLDLSENLM*VEEYLKNS.A
sp|B3Y618|TLR2_MACMU	R.VGNM*DTFTK.I
sp|F6QS54|MTND_MACMU	K.LDADKYENDPELEK.I
sp|F6RQL9|MTAP_MACMU	K.NVDCVLLAR.H
sp|F6RQL9|MTAP_MACMU	R.EEIQPGDIVIIDQFIDR.T
sp|F7EZ75|SIR5_MACMU	K.M*ARPSSSMADFRKCFAK.A
sp|F7EZ75|SIR5_MACMU	R.AIAECETR.L
sp|F7FQM7|APOA1_MACMU	F.KVSFLSALEEYTK.K
sp|F7FQM7|APOA1_MACMU	G.LLPVLESFK.V
sp|F7FQM7|APOA1_MACMU	H.LAPYSDELR.Q
sp|F7FQM7|APOA1_MACMU	K.AKPALEDLR.Q
sp|F7FQM7|APOA1_MACMU	K.AKPALEDLRQGLLPVLESFK.V
sp|F7FQM7|APOA1_MACMU	K.AKVQPYLDDFQK.K
sp|F7FQM7|APOA1_MACMU	K.AKVQPYLDDFQKK.W
sp|F7FQM7|APOA1_MACMU	K.ASEHLSTLSEK.A
sp|F7FQM7|APOA1_MACMU	K.DLEEVKAK.V
sp|F7FQM7|APOA1_MACMU	K.DLVTVYVEALK.D
sp|F7FQM7|APOA1_MACMU	K.DLVTVYVEALKDSG.K
sp|F7FQM7|APOA1_MACMU	K.DLVTVYVEALKDSGK.D
sp|F7FQM7|APOA1_MACMU	K.DLVTVYVEALKDSGKDYVSQFEGSALGK.Q
sp|F7FQM7|APOA1_MACMU	K.DSGKDYVSQFE.G
sp|F7FQM7|APOA1_MACMU	K.DSGKDYVSQFEG.S
sp|F7FQM7|APOA1_MACMU	K.DSGKDYVSQFEGSAL.G
sp|F7FQM7|APOA1_MACMU	K.DSGKDYVSQFEGSALG.K
sp|F7FQM7|APOA1_MACMU	K.DSGKDYVSQFEGSALGK.Q
sp|F7FQM7|APOA1_MACMU	K.DSGKDYVSQFEGSALGKQLNLK.L
sp|F7FQM7|APOA1_MACMU	K.DYVSQFEGSALGK.Q
sp|F7FQM7|APOA1_MACMU	K.ETEGLRQEM*SK.D
sp|F7FQM7|APOA1_MACMU	K.ETEGLRQEM*SKDLEEVK.A
sp|F7FQM7|APOA1_MACMU	K.ETEGLRQEMSK.D
sp|F7FQM7|APOA1_MACMU	K.ETEGLRQEMSKDLEEVK.A
sp|F7FQM7|APOA1_MACMU	K.KWQEEM*ELYR.Q
sp|F7FQM7|APOA1_MACMU	K.KWQEEMELYR.Q
sp|F7FQM7|APOA1_MACMU	K.LHELHEK.L
sp|F7FQM7|APOA1_MACMU	K.LHELHEKLSPLGEEVR.D
sp|F7FQM7|APOA1_MACMU	K.LLDNWDSVTSTVSK.L
sp|F7FQM7|APOA1_MACMU	K.LLDNWDSVTSTVSKLR.E
sp|F7FQM7|APOA1_MACMU	K.LLDNWDSVTSTVSKLREQLG.P
sp|F7FQM7|APOA1_MACMU	K.LLDNWDSVTSTVSKLREQLGPVTQEFWDNLEKETEGL.R
sp|F7FQM7|APOA1_MACMU	K.LREQLGPVTQEF.W
sp|F7FQM7|APOA1_MACMU	K.LREQLGPVTQEFWDNLEK.E
sp|F7FQM7|APOA1_MACMU	K.LREQLGPVTQEFWDNLEKETEGLR.Q
sp|F7FQM7|APOA1_MACMU	K.LSPLGEEVR.D
sp|F7FQM7|APOA1_MACMU	K.LSPLGEEVRD.R
sp|F7FQM7|APOA1_MACMU	K.LSPLGEEVRDR.A
sp|F7FQM7|APOA1_MACMU	K.VEPLRAELHEGTR.Q
sp|F7FQM7|APOA1_MACMU	K.VQPYLDDF.Q
sp|F7FQM7|APOA1_MACMU	K.VQPYLDDFQ.K
sp|F7FQM7|APOA1_MACMU	K.VQPYLDDFQK.K
sp|F7FQM7|APOA1_MACMU	K.VQPYLDDFQKK.W
sp|F7FQM7|APOA1_MACMU	K.VQPYLDDFQKKWQEEM*ELYR.Q
sp|F7FQM7|APOA1_MACMU	K.VQPYLDDFQKKWQEEM*ELYRQKVEPL.R
sp|F7FQM7|APOA1_MACMU	K.VQPYLDDFQKKWQEEMELYR.Q
sp|F7FQM7|APOA1_MACMU	K.VSFLSALEEY.T
sp|F7FQM7|APOA1_MACMU	K.VSFLSALEEYT.K
sp|F7FQM7|APOA1_MACMU	K.VSFLSALEEYTK.K
sp|F7FQM7|APOA1_MACMU	K.VSFLSALEEYTKK.L
sp|F7FQM7|APOA1_MACMU	K.VSFLSALEEYTKKLSTQ.-
sp|F7FQM7|APOA1_MACMU	K.WQEEM*ELYR.Q
sp|F7FQM7|APOA1_MACMU	K.WQEEMEL.Y
sp|F7FQM7|APOA1_MACMU	K.WQEEMELY.R
sp|F7FQM7|APOA1_MACMU	K.WQEEMELYR.Q
sp|F7FQM7|APOA1_MACMU	L.RAELHEGTR.Q
sp|F7FQM7|APOA1_MACMU	Q.DEPPQTPWDR.V
sp|F7FQM7|APOA1_MACMU	Q.DEPPQTPWDRVK.D
sp|F7FQM7|APOA1_MACMU	Q.DEPPQTPWDRVKDLVTVYVEALK.D
sp|F7FQM7|APOA1_MACMU	Q.GLLPVLESFK.V
sp|F7FQM7|APOA1_MACMU	R.AELHEGTR.Q
sp|F7FQM7|APOA1_MACMU	R.AHVDALR.T
sp|F7FQM7|APOA1_MACMU	R.AHVDALRTHLAPYSDELR.Q
sp|F7FQM7|APOA1_MACMU	R.EQLGPVTQ.E
sp|F7FQM7|APOA1_MACMU	R.EQLGPVTQEFW.D
sp|F7FQM7|APOA1_MACMU	R.EQLGPVTQEFWDNLEK.E
sp|F7FQM7|APOA1_MACMU	R.EQLGPVTQEFWDNLEKETEG.L
sp|F7FQM7|APOA1_MACMU	R.EQLGPVTQEFWDNLEKETEGLR.Q
sp|F7FQM7|APOA1_MACMU	R.EQLGPVTQEFWDNLEKETEGLRQEM*.S
sp|F7FQM7|APOA1_MACMU	R.EQLGPVTQEFWDNLEKETEGLRQEM*SK.D
sp|F7FQM7|APOA1_MACMU	R.EQLGPVTQEFWDNLEKETEGLRQEM*SKDLEEVK.A
sp|F7FQM7|APOA1_MACMU	R.EQLGPVTQEFWDNLEKETEGLRQEM.S
sp|F7FQM7|APOA1_MACMU	R.EQLGPVTQEFWDNLEKETEGLRQEMSK.D
sp|F7FQM7|APOA1_MACMU	R.LAARLEALKENGGAR.L
sp|F7FQM7|APOA1_MACMU	R.LAEYHAK.A
sp|F7FQM7|APOA1_MACMU	R.LEALKENGGAR.L
sp|F7FQM7|APOA1_MACMU	R.QEM*SKDLEEVK.A
sp|F7FQM7|APOA1_MACMU	R.QEMSKDLEEVK.A
sp|F7FQM7|APOA1_MACMU	R.QEMSKDLEEVKAK.V
sp|F7FQM7|APOA1_MACMU	R.QGLLPVLESF.K
sp|F7FQM7|APOA1_MACMU	R.QGLLPVLESFK.V
sp|F7FQM7|APOA1_MACMU	R.QGLLPVLESFKV.S
sp|F7FQM7|APOA1_MACMU	R.QGLLPVLESFKVS.F
sp|F7FQM7|APOA1_MACMU	R.QGLLPVLESFKVSFLSALEEYTK.K
sp|F7FQM7|APOA1_MACMU	R.QKLHELHEK.L
sp|F7FQM7|APOA1_MACMU	R.QKVEPLR.A
sp|F7FQM7|APOA1_MACMU	R.QKVEPLRAELH.E
sp|F7FQM7|APOA1_MACMU	R.QKVEPLRAELHEGTR.Q
sp|F7FQM7|APOA1_MACMU	R.THLAPYSD.E
sp|F7FQM7|APOA1_MACMU	R.THLAPYSDELR.Q
sp|F7FQM7|APOA1_MACMU	R.THLAPYSDELRQR.L
sp|F7FQM7|APOA1_MACMU	R.VKDLVTVYVEALK.D
sp|F7FQM7|APOA1_MACMU	R.VKDLVTVYVEALKDSGK.D
sp|F7FQM7|APOA1_MACMU	R.VKDLVTVYVEALKDSGKDYVSQFEGSALGK.Q
sp|F7FQM7|APOA1_MACMU	S.FLSALEEYTKK.L
sp|O02791|GALC_MACMU	A.YVLDDSDGLGR.E
sp|O18794|DEFB1_MACMU	R.SDHYNCVR.S
sp|O19092|CYTC_MACMU	A.GVNYFLDVELGR.T
sp|O19092|CYTC_MACMU	A.SNDM*YHSR.A
sp|O19092|CYTC_MACMU	A.SNDMYHSR.A
sp|O19092|CYTC_MACMU	A.SVEEEGVRR.A
sp|O19092|CYTC_MACMU	C.SFQIYTVPWQGTM*TLSK.S
sp|O19092|CYTC_MACMU	C.SFQIYTVPWQGTMTLSK.S
sp|O19092|CYTC_MACMU	D.ASVEEEGVR.R
sp|O19092|CYTC_MACMU	D.ASVEEEGVRR.A
sp|O19092|CYTC_MACMU	F.CSFQIYTVPWQGTM*TLSK.S
sp|O19092|CYTC_MACMU	F.CSFQIYTVPWQGTMTLSK.S
sp|O19092|CYTC_MACMU	F.QIYTVPWQGTM*TLSK.S
sp|O19092|CYTC_MACMU	F.QIYTVPWQGTMTLSK.S
sp|O19092|CYTC_MACMU	G.GPM*DASVEEEGVR.R
sp|O19092|CYTC_MACMU	G.GPM*DASVEEEGVRR.A
sp|O19092|CYTC_MACMU	G.GPMDASVEEEGVRR.A
sp|O19092|CYTC_MACMU	G.PM*DASVEEEGVRR.A
sp|O19092|CYTC_MACMU	G.PMDASVEEEGVRR.A
sp|O19092|CYTC_MACMU	K.AFCSFQ.I
sp|O19092|CYTC_MACMU	K.AFCSFQI.Y
sp|O19092|CYTC_MACMU	K.AFCSFQIY.T
sp|O19092|CYTC_MACMU	K.AFCSFQIYT.V
sp|O19092|CYTC_MACMU	K.AFCSFQIYTV.P
sp|O19092|CYTC_MACMU	K.AFCSFQIYTVP.W
sp|O19092|CYTC_MACMU	K.AFCSFQIYTVPW.Q
sp|O19092|CYTC_MACMU	K.AFCSFQIYTVPWQG.T
sp|O19092|CYTC_MACMU	K.AFCSFQIYTVPWQGT.M
sp|O19092|CYTC_MACMU	K.AFCSFQIYTVPWQGTM*.T
sp|O19092|CYTC_MACMU	K.AFCSFQIYTVPWQGTM*TL.S
sp|O19092|CYTC_MACMU	K.AFCSFQIYTVPWQGTM*TLSK.S
sp|O19092|CYTC_MACMU	K.AFCSFQIYTVPWQGTM*TLSKS.T
sp|O19092|CYTC_MACMU	K.AFCSFQIYTVPWQGTM*TLSKSTCQ.D
sp|O19092|CYTC_MACMU	K.AFCSFQIYTVPWQGTM.T
sp|O19092|CYTC_MACMU	K.AFCSFQIYTVPWQGTMTLS.K
sp|O19092|CYTC_MACMU	K.AFCSFQIYTVPWQGTMTLSK.S
sp|O19092|CYTC_MACMU	K.AFCSFQIYTVPWQGTMTLSKS.T
sp|O19092|CYTC_MACMU	K.ASNDM*Y.H
sp|O19092|CYTC_MACMU	K.ASNDM*YH.S
sp|O19092|CYTC_MACMU	K.ASNDM*YHS.R
sp|O19092|CYTC_MACMU	K.ASNDM*YHSR.A
sp|O19092|CYTC_MACMU	K.ASNDMY.H
sp|O19092|CYTC_MACMU	K.ASNDMYH.S
sp|O19092|CYTC_MACMU	K.ASNDMYHS.R
sp|O19092|CYTC_MACMU	K.ASNDMYHSR.A
sp|O19092|CYTC_MACMU	K.ASNDMYHSRA.L
sp|O19092|CYTC_MACMU	K.QIVAGVN.Y
sp|O19092|CYTC_MACMU	K.QIVAGVNY.F
sp|O19092|CYTC_MACMU	K.QIVAGVNYFLDVELGR.T
sp|O19092|CYTC_MACMU	K.QIVAGVNYFLDVELGRTTCTKTQPNL.D
sp|O19092|CYTC_MACMU	K.TQPNLDN.C
sp|O19092|CYTC_MACMU	K.TQPNLDNC.P
sp|O19092|CYTC_MACMU	K.TQPNLDNCP.F
sp|O19092|CYTC_MACMU	K.TQPNLDNCPF.H
sp|O19092|CYTC_MACMU	K.TQPNLDNCPFH.E
sp|O19092|CYTC_MACMU	K.TQPNLDNCPFHEQP.H
sp|O19092|CYTC_MACMU	K.TQPNLDNCPFHEQPH.L
sp|O19092|CYTC_MACMU	K.TQPNLDNCPFHEQPHL.K
sp|O19092|CYTC_MACMU	K.TQPNLDNCPFHEQPHLK.R
sp|O19092|CYTC_MACMU	K.TQPNLDNCPFHEQPHLKR.K
sp|O19092|CYTC_MACMU	L.DFAVSEYNK.A
sp|O19092|CYTC_MACMU	L.VGGPM*DASVEEEGVR.R
sp|O19092|CYTC_MACMU	L.VGGPM*DASVEEEGVRR.A
sp|O19092|CYTC_MACMU	L.VGGPMDASVEEEGVRR.A
sp|O19092|CYTC_MACMU	M.DASVEEEGVRR.A
sp|O19092|CYTC_MACMU	N.YFLDVELGR.T
sp|O19092|CYTC_MACMU	P.MDASVEEEGVRR.A
sp|O19092|CYTC_MACMU	P.RLVGGPM*DASVEEEGVR.R
sp|O19092|CYTC_MACMU	P.RLVGGPMDASVEEEGVR.R
sp|O19092|CYTC_MACMU	P.RLVGGPMDASVEEEGVRR.A
sp|O19092|CYTC_MACMU	Q.IYTVPWQGTMTLSK.S
sp|O19092|CYTC_MACMU	R.ALDFAVS.E
sp|O19092|CYTC_MACMU	R.ALDFAVSE.Y
sp|O19092|CYTC_MACMU	R.ALDFAVSEY.N
sp|O19092|CYTC_MACMU	R.ALDFAVSEYN.K
sp|O19092|CYTC_MACMU	R.ALDFAVSEYNK.A
sp|O19092|CYTC_MACMU	R.ALDFAVSEYNKA.S
sp|O19092|CYTC_MACMU	R.ALDFAVSEYNKASNDM*YHSR.A
sp|O19092|CYTC_MACMU	R.ALDFAVSEYNKASNDM*YHSRALQV.V
sp|O19092|CYTC_MACMU	R.ALDFAVSEYNKASNDM*YHSRALQVVR.A
sp|O19092|CYTC_MACMU	R.ALDFAVSEYNKASNDM*YHSRALQVVRARKQI.V
sp|O19092|CYTC_MACMU	R.ALDFAVSEYNKASNDMYHSR.A
sp|O19092|CYTC_MACMU	R.KAFCSFQ.I
sp|O19092|CYTC_MACMU	R.KAFCSFQI.Y
sp|O19092|CYTC_MACMU	R.KAFCSFQIY.T
sp|O19092|CYTC_MACMU	R.KAFCSFQIYTVPWQGTM*.T
sp|O19092|CYTC_MACMU	R.KAFCSFQIYTVPWQGTM*TLSK.S
sp|O19092|CYTC_MACMU	R.KAFCSFQIYTVPWQGTMTLSK.S
sp|O19092|CYTC_MACMU	R.KQIVAGVNY.F
sp|O19092|CYTC_MACMU	R.KQIVAGVNYFLD.V
sp|O19092|CYTC_MACMU	R.KQIVAGVNYFLDVELGR.T
sp|O19092|CYTC_MACMU	R.KQIVAGVNYFLDVELGRTTCTK.T
sp|O19092|CYTC_MACMU	R.LVGGPM*DA.S
sp|O19092|CYTC_MACMU	R.LVGGPM*DASVEEE.G
sp|O19092|CYTC_MACMU	R.LVGGPM*DASVEEEG.V
sp|O19092|CYTC_MACMU	R.LVGGPM*DASVEEEGVR.R
sp|O19092|CYTC_MACMU	R.LVGGPM*DASVEEEGVRR.A
sp|O19092|CYTC_MACMU	R.LVGGPM*DASVEEEGVRRA.L
sp|O19092|CYTC_MACMU	R.LVGGPM*DASVEEEGVRRALDFAVSEYN.K
sp|O19092|CYTC_MACMU	R.LVGGPMD.A
sp|O19092|CYTC_MACMU	R.LVGGPMDA.S
sp|O19092|CYTC_MACMU	R.LVGGPMDASVE.E
sp|O19092|CYTC_MACMU	R.LVGGPMDASVEE.E
sp|O19092|CYTC_MACMU	R.LVGGPMDASVEEE.G
sp|O19092|CYTC_MACMU	R.LVGGPMDASVEEEG.V
sp|O19092|CYTC_MACMU	R.LVGGPMDASVEEEGVR.R
sp|O19092|CYTC_MACMU	R.LVGGPMDASVEEEGVRR.A
sp|O19092|CYTC_MACMU	R.LVGGPMDASVEEEGVRRA.L
sp|O19092|CYTC_MACMU	R.LVGGPMDASVEEEGVRRALDFAVSEYNKAS.N
sp|O19092|CYTC_MACMU	R.LVGGPMDASVEEEGVRRALDFAVSEYNKASNDM*YHSRALQVV.R
sp|O19092|CYTC_MACMU	R.RALDFAVS.E
sp|O19092|CYTC_MACMU	R.RALDFAVSEYNK.A
sp|O19092|CYTC_MACMU	V.GGPM*DASVEEEGVRR.A
sp|O19092|CYTC_MACMU	V.GGPMDASVEEEGVRR.A
sp|O19092|CYTC_MACMU	W.QGTMTLSK.S
sp|O19092|CYTC_MACMU	Y.FLDVELGR.T
sp|O19092|CYTC_MACMU	Y.TVPWQGTM*TLSK.S
sp|O19092|CYTC_MACMU	Y.TVPWQGTMTLSK.S
sp|O46533|RNAS6_MACMU	H.WFEIQHIQPSPLQCNR.A
sp|O46533|RNAS6_MACMU	K.FFIVACDPPQK.G
sp|O46533|RNAS6_MACMU	K.HQNTFLHDSFQNVAAVCDLLSIICK.N
sp|O46533|RNAS6_MACMU	R.AHWFEIQHIQPSPLQCNR.A
sp|O46533|RNAS6_MACMU	R.LTSGKYPQCR.Y
sp|O46533|RNAS6_MACMU	R.YSAAAQYK.F
sp|O62643|THY1_MACMU	F.GTVGVPEHTYR.S
sp|O62643|THY1_MACMU	G.TVGVPEHTYR.S
sp|O62643|THY1_MACMU	K.HVLFGTVGVPEHTYR.S
sp|O62643|THY1_MACMU	K.KHVLFGTVGVPEHTYR.S
sp|O62643|THY1_MACMU	K.VTSLTAC.L
sp|O62643|THY1_MACMU	K.VTSLTACLVDQSLR.L
sp|O62643|THY1_MACMU	L.FGTVGVPEHTYR.S
sp|O62643|THY1_MACMU	L.TACLVDQSLR.L
sp|O62643|THY1_MACMU	T.ACLVDQSLR.L
sp|O62643|THY1_MACMU	T.VGVPEHTYR.S
sp|P00002|CYC_MACMU	K.GITWGEDTLM*EYLENPK.K
sp|P00002|CYC_MACMU	K.GITWGEDTLM*EYLENPKK.C
sp|P00002|CYC_MACMU	K.GITWGEDTLMEYLENPK.K
sp|P00002|CYC_MACMU	K.GITWGEDTLMEYLENPKK.C
sp|P00002|CYC_MACMU	K.KYIPGTK.M
sp|P00002|CYC_MACMU	K.MIFVGIK.K
sp|P00002|CYC_MACMU	K.TGPNLHGLFGR.K
sp|P00002|CYC_MACMU	K.TGPNLHGLFGRK.T
sp|P00002|CYC_MACMU	K.TGQAPGYSYTAANK.N
sp|P00002|CYC_MACMU	R.ADLIAYLK.E
sp|P00002|CYC_MACMU	R.ADLIAYLKK.A
sp|P00916|CAH1_MACMU	K.ADGLAVIGVLM*K.V
sp|P00916|CAH1_MACMU	K.ADGLAVIGVLMK.V
sp|P00916|CAH1_MACMU	K.EIINVGH.S
sp|P00916|CAH1_MACMU	K.EIINVGHSFHVNFEDNDNR.S
sp|P00916|CAH1_MACMU	K.ESISVSSEQLAQFR.S
sp|P00916|CAH1_MACMU	K.GGPFSDSYR.L
sp|P00916|CAH1_MACMU	K.LYPIANGNNQSPVDIK.T
sp|P00916|CAH1_MACMU	K.NGPEQWSK.L
sp|P00916|CAH1_MACMU	K.VGEANPK.L
sp|P00916|CAH1_MACMU	K.VLDALHAIK.T
sp|P00916|CAH1_MACMU	K.YSSLAEAVSK.A
sp|P00916|CAH1_MACMU	K.YSSLAEAVSKADGLAVIGVLMK.V
sp|P02026|HBB_MACMU	-.VHLTPEEK.N
sp|P02026|HBB_MACMU	-.VHLTPEEKNAVTTLWGK.V
sp|P02026|HBB_MACMU	-.VHLTPEEKNAVTTLWGKVN.V
sp|P02026|HBB_MACMU	-.VHLTPEEKNAVTTLWGKVNVDEVGGEALGR.L
sp|P02026|HBB_MACMU	D.GLNHLDNLK.G
sp|P02026|HBB_MACMU	F.ESFGDLSSPDAVM*GNPK.V
sp|P02026|HBB_MACMU	F.ESFGDLSSPDAVMGNPK.V
sp|P02026|HBB_MACMU	F.GDLSSPDAVM*GNPK.V
sp|P02026|HBB_MACMU	F.GDLSSPDAVMGNPK.V
sp|P02026|HBB_MACMU	F.SDGLNHLDNLK.G
sp|P02026|HBB_MACMU	G.DLSSPDAVM*GNPK.V
sp|P02026|HBB_MACMU	G.DLSSPDAVMGNPK.V
sp|P02026|HBB_MACMU	G.KVNVDEVGGEALGR.L
sp|P02026|HBB_MACMU	K.EFTPQVQ.A
sp|P02026|HBB_MACMU	K.EFTPQVQA.A
sp|P02026|HBB_MACMU	K.EFTPQVQAA.Y
sp|P02026|HBB_MACMU	K.EFTPQVQAAY.Q
sp|P02026|HBB_MACMU	K.EFTPQVQAAYQ.K
sp|P02026|HBB_MACMU	K.EFTPQVQAAYQK.V
sp|P02026|HBB_MACMU	K.GTFAQLSEL.H
sp|P02026|HBB_MACMU	K.GTFAQLSELH.C
sp|P02026|HBB_MACMU	K.GTFAQLSELHCD.K
sp|P02026|HBB_MACMU	K.GTFAQLSELHCDK.L
sp|P02026|HBB_MACMU	K.GTFAQLSELHCDKL.H
sp|P02026|HBB_MACMU	K.GTFAQLSELHCDKLHVD.P
sp|P02026|HBB_MACMU	K.GTFAQLSELHCDKLHVDPENFK.L
sp|P02026|HBB_MACMU	K.KVLGAFSDGLNHLDNLK.G
sp|P02026|HBB_MACMU	K.KVLGAFSDGLNHLDNLKG.T
sp|P02026|HBB_MACMU	K.LHVDPENFK.L
sp|P02026|HBB_MACMU	K.LLGNVLVC.V
sp|P02026|HBB_MACMU	K.LLGNVLVCVL.A
sp|P02026|HBB_MACMU	K.LLGNVLVCVLAH.H
sp|P02026|HBB_MACMU	K.LLGNVLVCVLAHH.F
sp|P02026|HBB_MACMU	K.LLGNVLVCVLAHHFGK.E
sp|P02026|HBB_MACMU	K.NAVTTLW.G
sp|P02026|HBB_MACMU	K.NAVTTLWGK.V
sp|P02026|HBB_MACMU	K.NAVTTLWGKVNVDEVGGEALGR.L
sp|P02026|HBB_MACMU	K.VLGAFSDGLNHLDNLK.G
sp|P02026|HBB_MACMU	K.VLGAFSDGLNHLDNLKG.T
sp|P02026|HBB_MACMU	K.VLGAFSDGLNHLDNLKGTFAQLSELHCDK.L
sp|P02026|HBB_MACMU	K.VLGAFSDGLNHLDNLKGTFAQLSELHCDKLHVDPENFK.L
sp|P02026|HBB_MACMU	K.VNVDEVGG.E
sp|P02026|HBB_MACMU	K.VNVDEVGGE.A
sp|P02026|HBB_MACMU	K.VNVDEVGGEALGR.L
sp|P02026|HBB_MACMU	K.VVAGVAN.A
sp|P02026|HBB_MACMU	K.VVAGVANA.L
sp|P02026|HBB_MACMU	K.VVAGVANAL.A
sp|P02026|HBB_MACMU	K.VVAGVANALA.H
sp|P02026|HBB_MACMU	K.VVAGVANALAH.K
sp|P02026|HBB_MACMU	K.VVAGVANALAHK.Y
sp|P02026|HBB_MACMU	K.VVAGVANALAHKY.H
sp|P02026|HBB_MACMU	K.VVAGVANALAHKYH.-
sp|P02026|HBB_MACMU	L.HVDPENFK.L
sp|P02026|HBB_MACMU	N.AVTTLWGK.V
sp|P02026|HBB_MACMU	N.AVTTLWGKVNVDEVGGEALGR.L
sp|P02026|HBB_MACMU	N.VDEVGGEALGR.L
sp|P02026|HBB_MACMU	R.FFESFGD.L
sp|P02026|HBB_MACMU	R.FFESFGDL.S
sp|P02026|HBB_MACMU	R.FFESFGDLSSP.A
sp|P02026|HBB_MACMU	R.FFESFGDLSSPD.A
sp|P02026|HBB_MACMU	R.FFESFGDLSSPDA.V
sp|P02026|HBB_MACMU	R.FFESFGDLSSPDAVM*.G
sp|P02026|HBB_MACMU	R.FFESFGDLSSPDAVM*G.N
sp|P02026|HBB_MACMU	R.FFESFGDLSSPDAVM*GN.P
sp|P02026|HBB_MACMU	R.FFESFGDLSSPDAVM*GNPK.V
sp|P02026|HBB_MACMU	R.FFESFGDLSSPDAVM*GNPKVK.A
sp|P02026|HBB_MACMU	R.FFESFGDLSSPDAVM*GNPKVKAH.G
sp|P02026|HBB_MACMU	R.FFESFGDLSSPDAVM*GNPKVKAHG.K
sp|P02026|HBB_MACMU	R.FFESFGDLSSPDAVM*GNPKVKAHGKKVLG.A
sp|P02026|HBB_MACMU	R.FFESFGDLSSPDAVM.G
sp|P02026|HBB_MACMU	R.FFESFGDLSSPDAVMG.N
sp|P02026|HBB_MACMU	R.FFESFGDLSSPDAVMGN.P
sp|P02026|HBB_MACMU	R.FFESFGDLSSPDAVMGNPK.V
sp|P02026|HBB_MACMU	R.FFESFGDLSSPDAVMGNPKVK.A
sp|P02026|HBB_MACMU	V.DEVGGEALGR.L
sp|P02026|HBB_MACMU	W.GKVNVDEVGGEALGR.L
sp|P02488|CRYAA_MACMU	R.TVLDSGISEVR.S
sp|P02653|APOA2_MACMU	-.QAEEPSVESLVSQYFQTVTDYGK.D
sp|P02653|APOA2_MACMU	-.QAEEPSVESLVSQYFQTVTDYGKDLM*EK.V
sp|P02653|APOA2_MACMU	-.QAEEPSVESLVSQYFQTVTDYGKDLMEK.V
sp|P02653|APOA2_MACMU	A.EEPSVESLVSQYFQTVTDYGK.D
sp|P02653|APOA2_MACMU	A.EEPSVESLVSQYFQTVTDYGKDLMEK.V
sp|P02653|APOA2_MACMU	K.AGTDLVNFL.S
sp|P02653|APOA2_MACMU	K.AGTDLVNFLSY.F
sp|P02653|APOA2_MACMU	K.AGTDLVNFLSYF.V
sp|P02653|APOA2_MACMU	K.AGTDLVNFLSYFVEL.R
sp|P02653|APOA2_MACMU	K.AGTDLVNFLSYFVELR.T
sp|P02653|APOA2_MACMU	K.AGTDLVNFLSYFVELRTQPAT.Q
sp|P02653|APOA2_MACMU	K.AGTDLVNFLSYFVELRTQPATQ.-
sp|P02653|APOA2_MACMU	K.EQLTPLVK.K
sp|P02653|APOA2_MACMU	K.EQLTPLVKK.A
sp|P02653|APOA2_MACMU	K.KAGTDLVNFL.S
sp|P02653|APOA2_MACMU	K.KAGTDLVNFLSY.F
sp|P02653|APOA2_MACMU	K.KAGTDLVNFLSYFV.E
sp|P02653|APOA2_MACMU	K.KAGTDLVNFLSYFVEL.R
sp|P02653|APOA2_MACMU	K.KAGTDLVNFLSYFVELR.T
sp|P02653|APOA2_MACMU	K.KAGTDLVNFLSYFVELRTQPATQ.-
sp|P02653|APOA2_MACMU	K.SKEQLTPLVK.K
sp|P02653|APOA2_MACMU	K.SKEQLTPLVKK.A
sp|P02653|APOA2_MACMU	K.SPELQAQAK.A
sp|P02653|APOA2_MACMU	K.VKSPELQAQ.A
sp|P02653|APOA2_MACMU	K.VKSPELQAQA.K
sp|P02653|APOA2_MACMU	K.VKSPELQAQAK.A
sp|P02653|APOA2_MACMU	N.FLSYFVELR.T
sp|P02653|APOA2_MACMU	Q.AEEPSVESLVSQYFQTVTDYGKDLMEK.V
sp|P02738|SAA_MACMU	-.RSWFSFLGEAYDGAR.D
sp|P02738|SAA_MACMU	A.AEVISDAR.E
sp|P02738|SAA_MACMU	F.LGEAYDGAR.D
sp|P02738|SAA_MACMU	F.SFLGEAYDGAR.D
sp|P02738|SAA_MACMU	K.AYSDM*KEANYK.N
sp|P02738|SAA_MACMU	K.AYSDMKEANYK.N
sp|P02738|SAA_MACMU	P.GGVWAAEVISDAR.E
sp|P02738|SAA_MACMU	Q.GNYDAAER.G
sp|P02738|SAA_MACMU	R.GNYDAAQR.G
sp|P02738|SAA_MACMU	R.GNYDAAQRGP.G
sp|P02738|SAA_MACMU	R.GNYDAAQRGPGG.A
sp|P02738|SAA_MACMU	R.GNYDAAQRGPGGVWAAEVISDAR.E
sp|P02738|SAA_MACMU	R.GPGGVWAAEVISDAR.E
sp|P02738|SAA_MACMU	R.GPGGVWAAEVISDARENIQK.L
sp|P02738|SAA_MACMU	R.SWFSFLGEAYDGAR.D
sp|P02738|SAA_MACMU	S.FLGEAYDGAR.D
sp|P02738|SAA_MACMU	S.WFSFLGEAYDGAR.D
sp|P11489|PEPA_MACMU	R.ANNQVGLAPVA.-
sp|P11489|PEPA_MACMU	R.NLSEHGLLK.D
sp|P11489|PEPA_MACMU	R.QYFTVFDR.A
sp|P12545|PLMN_MACMU	F.CGGTLISPEWVLTAAHCLEK.S
sp|P12545|PLMN_MACMU	G.EPLDDYVNTK.G
sp|P12545|PLMN_MACMU	K.ATTVTGTPCQ.E
sp|P12545|PLMN_MACMU	K.ATTVTGTPCQEWAAQEPH.S
sp|P12545|PLMN_MACMU	K.ATTVTGTPCQEWAAQEPHSHR.I
sp|P12545|PLMN_MACMU	K.CEEEEEFTCR.S
sp|P12545|PLMN_MACMU	K.CSGTEGS.V
sp|P12545|PLMN_MACMU	K.CSGTEGSVAAPPP.V
sp|P12545|PLMN_MACMU	K.CSGTEGSVAAPPPVAQLPDAETPSEEDCM*FGNGK.G
sp|P12545|PLMN_MACMU	K.CSGTEGSVAAPPPVAQLPDAETPSEEDCMFGNGK.G
sp|P12545|PLMN_MACMU	K.CSGTEGSVAAPPPVAQLPDAETPSEEDCMFGNGKG.Y
sp|P12545|PLMN_MACMU	K.EARLPVIENK.V
sp|P12545|PLMN_MACMU	K.EQQCVIM*AEN.R
sp|P12545|PLMN_MACMU	K.EQQCVIM*AENR.K
sp|P12545|PLMN_MACMU	K.EQQCVIM*AENRK.S
sp|P12545|PLMN_MACMU	K.EQQCVIMAENR.K
sp|P12545|PLMN_MACMU	K.EQQCVIMAENRK.S
sp|P12545|PLMN_MACMU	K.GASLFSITK.K
sp|P12545|PLMN_MACMU	K.GASLFSITKK.Q
sp|P12545|PLMN_MACMU	K.GTGENYR.G
sp|P12545|PLMN_MACMU	K.KCSGTEGSVAAPPP.V
sp|P12545|PLMN_MACMU	K.KQLGAGSIEECAAK.C
sp|P12545|PLMN_MACMU	K.KQLGAGSIEECAAKCEEEEEFTCR.S
sp|P12545|PLMN_MACMU	K.KVYLSECK.T
sp|P12545|PLMN_MACMU	K.LFDYCDVP.Q
sp|P12545|PLMN_MACMU	K.LFDYCDVPQCAA.S
sp|P12545|PLMN_MACMU	K.LFDYCDVPQCAAS.S
sp|P12545|PLMN_MACMU	K.LFDYCDVPQCAASSFDCGKPQVEPK.K
sp|P12545|PLMN_MACMU	K.LSSPAIITDK.V
sp|P12545|PLMN_MACMU	K.LSSPAIITDKVIPA.C
sp|P12545|PLMN_MACMU	K.LSSPAIITDKVIPACLPSPN.Y
sp|P12545|PLMN_MACMU	K.LSSPAIITDKVIPACLPSPNYVVADR.T
sp|P12545|PLMN_MACMU	K.LSSPAIITDKVIPACLPSPNYVVADRTECFITGWGETQGTYGAGLLK.E
sp|P12545|PLMN_MACMU	K.M*FSEPAR.A
sp|P12545|PLMN_MACMU	K.MFSEPAR.A
sp|P12545|PLMN_MACMU	K.MFSEPARADIALLK.L
sp|P12545|PLMN_MACMU	K.NLDENYCR.N
sp|P12545|PLMN_MACMU	K.NLDENYCRNPDGEK.A
sp|P12545|PLMN_MACMU	K.NLDENYCRNPDGEKAPWCYTTNSQVR.W
sp|P12545|PLMN_MACMU	K.NYCRNPDGDVGGPWCYTTNPR.K
sp|P12545|PLMN_MACMU	K.NYCRNPDGEPR.P
sp|P12545|PLMN_MACMU	K.QLGAGSIEECAAK.C
sp|P12545|PLMN_MACMU	K.QLGAGSIEECAAKCEEEEEFTCR.S
sp|P12545|PLMN_MACMU	K.RWELCDIPR.C
sp|P12545|PLMN_MACMU	K.SSRPSFYK.V
sp|P12545|PLMN_MACMU	K.TPENFPNAGLTM*NYCR.N
sp|P12545|PLMN_MACMU	K.TPENFPNAGLTM.N
sp|P12545|PLMN_MACMU	K.TPENFPNAGLTMN.Y
sp|P12545|PLMN_MACMU	K.TPENFPNAGLTMNYCR.N
sp|P12545|PLMN_MACMU	K.TTELCAGHLAGGTDSCQGDSGGPLVCFEK.D
sp|P12545|PLMN_MACMU	K.TTELCAGHLAGGTDSCQGDSGGPLVCFEKDK.Y
sp|P12545|PLMN_MACMU	K.VILGAHR.E
sp|P12545|PLMN_MACMU	K.VIPACLPSPNYVVADR.T
sp|P12545|PLMN_MACMU	K.VIPACLPSPNYVVADRTECFITGWGETQGTYGAGLLK.E
sp|P12545|PLMN_MACMU	K.VYLSECK.T
sp|P12545|PLMN_MACMU	N.YVVADRTECFITGWGETQGTYGAGLLK.E
sp|P12545|PLMN_MACMU	P.LDDYVNTK.G
sp|P12545|PLMN_MACMU	R.CTTPPPSSGP.T
sp|P12545|PLMN_MACMU	R.CTTPPPSSGPT.Y
sp|P12545|PLMN_MACMU	R.CTTPPPSSGPTYQCLK.G
sp|P12545|PLMN_MACMU	R.DVVLFEK.K
sp|P12545|PLMN_MACMU	R.DVVLFEKK.V
sp|P12545|PLMN_MACMU	R.EVHLEPHVQEIEVSK.M
sp|P12545|PLMN_MACMU	R.FDYCDIPECEDECM*HCSGENYDGK.I
sp|P12545|PLMN_MACMU	R.FDYCDIPECEDECMHCSGENYDGK.I
sp|P12545|PLMN_MACMU	R.FVTWIEGVM*R.N
sp|P12545|PLMN_MACMU	R.FVTWIEGVMR.N
sp|P12545|PLMN_MACMU	R.IFTPETNPR.A
sp|P12545|PLMN_MACMU	R.KLFDYCDVPQCAASSFDCGKPQVEPK.K
sp|P12545|PLMN_MACMU	R.KSSIVFR.M
sp|P12545|PLMN_MACMU	R.LGM*HFCGGTLISPEWVLTAAHCLEK.S
sp|P12545|PLMN_MACMU	R.LGMHFCGGTLISPEWVLTAAHCLEK.S
sp|P12545|PLMN_MACMU	R.M*RDVVLFEK.K
sp|P12545|PLMN_MACMU	R.MRDVVLFEK.K
sp|P12545|PLMN_MACMU	R.MRDVVLFEKK.V
sp|P12545|PLMN_MACMU	R.NPDADKGP.W
sp|P12545|PLMN_MACMU	R.NPDADKGPWCFTTDPSVR.W
sp|P12545|PLMN_MACMU	R.NPDGDVGGPWCYTTNPR.K
sp|P12545|PLMN_MACMU	R.NPDGEKAPWCY.T
sp|P12545|PLMN_MACMU	R.NPDGEKAPWCYTTN.S
sp|P12545|PLMN_MACMU	R.NPDGEKAPWCYTTNSQVR.W
sp|P12545|PLMN_MACMU	R.NPDGEPRPWCFTTDPNK.R
sp|P12545|PLMN_MACMU	R.NPDGEPRPWCFTTDPNKR.W
sp|P12545|PLMN_MACMU	R.NPDNDGQGPWCY.T
sp|P12545|PLMN_MACMU	R.NPDNDGQGPWCYTTDPEER.F
sp|P12545|PLMN_MACMU	R.SFQYHSK.E
sp|P12545|PLMN_MACMU	R.TECFITGWGETQGTYGAGLLK.E
sp|P12545|PLMN_MACMU	R.TGITCQK.W
sp|P12545|PLMN_MACMU	R.TPENFPCK.N
sp|P12545|PLMN_MACMU	R.TPENFPCKNLDENYCR.N
sp|P12545|PLMN_MACMU	R.VVGGCVAYPHSWPWQISLR.T
sp|P12545|PLMN_MACMU	R.WELCDIPR.C
sp|P12545|PLMN_MACMU	R.WEYCNLK.K
sp|P12545|PLMN_MACMU	R.WEYCNLKK.C
sp|P14417|APOA_MACMU	K.STELCAGHLAGGTDR.C
sp|P14417|APOA_MACMU	K.VILGAHQEVNLESHVQEIEVSR.L
sp|P14417|APOA_MACMU	K.VIPACLPSPN.Y
sp|P14417|APOA_MACMU	R.GSFSTTVTGR.I
sp|P14417|APOA_MACMU	R.GTFSTTVTGR.T
sp|P14417|APOA_MACMU	R.GTSSTTVTGR.N
sp|P14417|APOA_MACMU	R.GTYFTTVTGR.T
sp|P14417|APOA_MACMU	R.GTYSTTVTGR.T
sp|P14417|APOA_MACMU	R.LFLEPIGADIALLK.L
sp|P14417|APOA_MACMU	R.LGVQECYHSNGQSYR.G
sp|P14417|APOA_MACMU	R.NPDAEIRPWCYTM*DPSVR.W
sp|P14417|APOA_MACMU	R.NPDAEIRPWCYTMDPR.V
sp|P14417|APOA_MACMU	R.NPDAEIRPWCYTMDPSVR.W
sp|P14417|APOA_MACMU	R.NPDPVAAP.W
sp|P14417|APOA_MACMU	R.NPDPVAAPWCY.T
sp|P14417|APOA_MACMU	R.NPDPVAAPWCYTTDPSVR.W
sp|P14417|APOA_MACMU	R.NPDPVAAPYCYTM*DPNVR.W
sp|P14417|APOA_MACMU	R.NPDPVAAPYCYTMDPNVR.W
sp|P14417|APOA_MACMU	R.TIEYYPNGGLTK.N
sp|P14417|APOA_MACMU	R.TPENHPNDDLTM*NYCR.N
sp|P14417|APOA_MACMU	R.TPENHPNDDLTMNYCR.N
sp|P14417|APOA_MACMU	R.TPENYPNAGLTR.N
sp|P14417|APOA_MACMU	R.TPENYPNAGLVK.N
sp|P14417|APOA_MACMU	R.TPENYPNGGLIR.N
sp|P14417|APOA_MACMU	R.TTEYYPDGGLTR.N
sp|P14417|APOA_MACMU	Y.CYTMDPNVR.W
sp|P15426|TPIS_MACMU	K.DCGATWVVLGHSER.R
sp|P15426|TPIS_MACMU	K.ELASQPDVDGFLVGGASLKPEFVDIINAK.-
sp|P15426|TPIS_MACMU	K.ELASQPDVDGFLVGGASLKPEFVDIINAKQ.-
sp|P15426|TPIS_MACMU	K.IAVAAQNCYK.V
sp|P15426|TPIS_MACMU	K.QNLGELIGTLNAAK.V
sp|P15426|TPIS_MACMU	K.SNVSEAVAQSTR.I
sp|P15426|TPIS_MACMU	K.TATPQQAQEVHEK.F
sp|P15426|TPIS_MACMU	K.VAHALAEGLGVIACIGEK.L
sp|P15426|TPIS_MACMU	K.VAHALAEGLGVIACIGEKLDER.E
sp|P15426|TPIS_MACMU	K.VAHALAEGLGVIACIGEKLDEREAGITEK.V
sp|P15426|TPIS_MACMU	K.VIADNVK.D
sp|P15426|TPIS_MACMU	K.VIADNVKDWSK.A
sp|P15426|TPIS_MACMU	K.VPADTEVVCAPP.T
sp|P15426|TPIS_MACMU	K.VPADTEVVCAPPTAYIDFAR.Q
sp|P15426|TPIS_MACMU	K.VTNGAFTGEISPGM*IK.D
sp|P15426|TPIS_MACMU	K.VTNGAFTGEISPGMIK.D
sp|P15426|TPIS_MACMU	K.VVFEQTK.V
sp|P15426|TPIS_MACMU	K.VVLAYEPVWAIGTGK.T
sp|P15426|TPIS_MACMU	R.HVFGESDELIGQK.V
sp|P15426|TPIS_MACMU	R.IIYGGSVTGATCK.E
sp|P15426|TPIS_MACMU	R.KQNLGELIGTLNAAK.V
sp|P15426|TPIS_MACMU	R.KQNLGELIGTLNAAKVPADTEVVCAPPTAYIDFAR.Q
sp|P28469|ADH1A_MACMU	K.ELGATECINPQDYK.K
sp|P28469|ADH1A_MACMU	K.INEGFDLLR.S
sp|P28469|ADH1A_MACMU	R.IIAVDINKDKFAK.A
sp|P29216|A4_MACMU	-.EVCSEQAETGPC.R
sp|P29216|A4_MACMU	-.EVCSEQAETGPCR.A
sp|P29216|A4_MACMU	-.EVCSEQAETGPCRAM*ISR.W
sp|P29216|A4_MACMU	-.EVCSEQAETGPCRAMISR.W
sp|P29216|A4_MACMU	K.CAPFFYGGCGGNR.N
sp|P29216|A4_MACMU	R.WYFDVTEGK.C
sp|P29451|THIO_MACMU	K.CM*PTFQFFK.K
sp|P29451|THIO_MACMU	K.CMPTFQFFK.K
sp|P29451|THIO_MACMU	K.EKLEATINELV.-
sp|P29451|THIO_MACMU	K.LEATINELV.-
sp|P29451|THIO_MACMU	K.LVVVDFSATWCGPCK.M
sp|P29451|THIO_MACMU	K.M*IKPFFHSLSEK.Y
sp|P29451|THIO_MACMU	K.VGEFSGANK.E
sp|P29451|THIO_MACMU	K.VGEFSGANKEK.L
sp|P29451|THIO_MACMU	K.VGEFSGANKEKLEATINELV.-
sp|P29451|THIO_MACMU	K.YSNVVFLEVDVDDCQDVASECEVK.C
sp|P30201|LYSC_MACMU	C.HISCNALLQDNIADAVTCAK.R
sp|P30201|LYSC_MACMU	C.HISCNALLQDNIADAVTCAKR.V
sp|P30201|LYSC_MACMU	C.NALLQDNIADAVTCAK.R
sp|P30201|LYSC_MACMU	K.RLGLDGYR.G
sp|P30201|LYSC_MACMU	K.RVVSDPQ.G
sp|P30201|LYSC_MACMU	K.RVVSDPQGIR.A
sp|P30201|LYSC_MACMU	K.TPGAVNAC.H
sp|P30201|LYSC_MACMU	K.TPGAVNACH.I
sp|P30201|LYSC_MACMU	K.TPGAVNACHIS.C
sp|P30201|LYSC_MACMU	K.TPGAVNACHISC.N
sp|P30201|LYSC_MACMU	K.TPGAVNACHISCN.A
sp|P30201|LYSC_MACMU	K.TPGAVNACHISCNALLQDNIAD.A
sp|P30201|LYSC_MACMU	K.TPGAVNACHISCNALLQDNIADAVTCAK.R
sp|P30201|LYSC_MACMU	K.WESNYNTQATNYNPGDQSTDYGIF.Q
sp|P30201|LYSC_MACMU	N.ALLQDNIADAVTCAK.R
sp|P30201|LYSC_MACMU	R.AWVAWR.N
sp|P30201|LYSC_MACMU	R.DVSQYVQ.G
sp|P30201|LYSC_MACMU	R.DVSQYVQGC.G
sp|P30201|LYSC_MACMU	R.DVSQYVQGCG.V
sp|P30201|LYSC_MACMU	R.DVSQYVQGCGV.-
sp|P30201|LYSC_MACMU	R.GISLANWVCLAK.W
sp|P30201|LYSC_MACMU	R.LGLDGYR.G
sp|P30201|LYSC_MACMU	R.VVSDPQGIR.A
sp|P33617|HLAF_MACMU	K.WAAVVVPSGEEQR.Y
sp|P33617|HLAF_MACMU	R.YLENGKETLQR.A
sp|P40286|H1T_MACMU	K.ALAAAGYDVEK.N
sp|P55151|PRL_MACMU	K.AVEIEEQTKR.L
sp|P55151|PRL_MACMU	K.ENEIYPVWTGLPSLQM*ADEESR.L
sp|P55151|PRL_MACMU	K.ENEIYPVWTGLPSLQMADEESR.L
sp|P55151|PRL_MACMU	R.GM*EEAPEAILSK.A
sp|P55151|PRL_MACMU	R.GMEEAPEAILSK.A
sp|P55151|PRL_MACMU	R.IIHNNNC.-
sp|P55151|PRL_MACMU	R.LLEGMELIVSQVHPETK.E
sp|P55151|PRL_MACMU	R.SWNEPLYHLVTEVR.G
sp|P55245|EGFR_MACMU	K.ATGQVCHALCSPEGCWGPEPR.D
sp|P55245|EGFR_MACMU	K.EISDGDVIISGNK.N
sp|P55245|EGFR_MACMU	K.IICAQQCSGR.C
sp|P55245|EGFR_MACMU	K.TIQEVAGYVLIALNTVER.I
sp|P55245|EGFR_MACMU	R.ESDCLVCR.K
sp|P55245|EGFR_MACMU	R.FSNNPALCNVESIQWR.D
sp|P55245|EGFR_MACMU	R.GDSFTHTPPLDPQELDILK.T
sp|P55245|EGFR_MACMU	R.TDLHAFENLEIIR.G
sp|P57786|TAU_MACMU	K.ESPLQTPAEDGSEELGSETSDAK.S
sp|P57786|TAU_MACMU	K.IGSTENLK.H
sp|P57786|TAU_MACMU	K.STPTAEDVTAPLVDER.A
sp|P57786|TAU_MACMU	K.TDHGAEIVYK.S
sp|P57786|TAU_MACMU	R.QEFDVMEDHAGTYGLGDRK.D
sp|P57786|TAU_MACMU	R.SGYSSPGSPGTPGSR.S
sp|P59822|IL1AP_MACMU	K.KVTSEDLKR.S
sp|P59822|IL1AP_MACMU	K.VAFPLEVVQK.D
sp|P59822|IL1AP_MACMU	K.VTSEDLKR.S
sp|P59822|IL1AP_MACMU	R.CDDWGLDTMR.Q
sp|P59822|IL1AP_MACMU	R.DLEEPINFR.L
sp|P59822|IL1AP_MACMU	R.DLEEPINFRLPENR.I
sp|P59822|IL1AP_MACMU	R.NEVWWTIDGK.K
sp|P59822|IL1AP_MACMU	R.QDRDLEEPINFRLPENR.I
sp|P59822|IL1AP_MACMU	R.QIQVFEDEPAR.I
sp|P60030|DEF1_MACMU	R.IPACLAGER.R
sp|P60030|DEF1_MACMU	R.IPACLAGERR.Y
sp|P60030|DEF1_MACMU	R.TDEATAAQEQIPTDNPEVVVSLAWDESLAPK.D
sp|P60030|DEF1_MACMU	R.VWAFCC.-
sp|P60877|SNP25_MACMU	K.TRIDEANQR.A
sp|P60877|SNP25_MACMU	R.ADQLADESLESTRR.M
sp|P60877|SNP25_MACMU	R.ENEMDENLEQVSGIIGNLR.H
sp|P60877|SNP25_MACMU	R.NELEEM*QR.R
sp|P60877|SNP25_MACMU	R.RADQLADESLESTR.R
sp|P60877|SNP25_MACMU	R.RADQLADESLESTRR.M
sp|P60877|SNP25_MACMU	R.TLVMLDEQGEQLER.I
sp|P61050|LYNX1_MACMU	A.LDCHVCAYNGDNCFNPM*R.C
sp|P61050|LYNX1_MACMU	A.LDCHVCAYNGDNCFNPMR.C
sp|P61050|LYNX1_MACMU	R.CPAM*VAY.C
sp|P61050|LYNX1_MACMU	R.CPAM*VAYCM*TTR.T
sp|P61050|LYNX1_MACMU	R.CPAMVAY.C
sp|P61050|LYNX1_MACMU	R.DSTHCVTTATR.V
sp|P61050|LYNX1_MACMU	R.VLSNIENLPLVTK.M
sp|P61143|SYUA_MACMU	K.AKEGVVAAAEK.T
sp|P61143|SYUA_MACMU	K.EGVLYVGSK.T
sp|P61143|SYUA_MACMU	K.EGVVAAAEK.T
sp|P61143|SYUA_MACMU	K.EGVVHGVATVAEK.T
sp|P61143|SYUA_MACMU	K.TKEGVVHGVATVAEK.T
sp|P61277|CATK_MACMU	K.GYVTPVK.D
sp|P62940|PPIA_MACMU	K.EGM*NIVEAM*ER.F
sp|P62940|PPIA_MACMU	K.EGM*NIVEAMER.F
sp|P62940|PPIA_MACMU	K.EGMNIVEAM*ER.F
sp|P62940|PPIA_MACMU	K.EGMNIVEAMER.F
sp|P62940|PPIA_MACMU	K.FEDENFILK.H
sp|P62940|PPIA_MACMU	K.HTGPGILSMANAGPNTNGSQFFICTAK.I
sp|P62940|PPIA_MACMU	K.ITIADCGQLE.-
sp|P62940|PPIA_MACMU	K.KITIADCGQLE.-
sp|P62940|PPIA_MACMU	K.SIYGEKFEDENFILK.H
sp|P62940|PPIA_MACMU	K.TEWLDGK.H
sp|P62940|PPIA_MACMU	K.TEWLDGKHVVFGK.V
sp|P62940|PPIA_MACMU	K.VKEGM*NIVEAM*ER.F
sp|P62940|PPIA_MACMU	K.VKEGM*NIVEAMER.F
sp|P62940|PPIA_MACMU	K.VKEGMNIVEAM*ER.F
sp|P62940|PPIA_MACMU	K.VKEGMNIVEAMER.F
sp|P62940|PPIA_MACMU	M.VNPTVFFDIAVDGEPLGR.V
sp|P62940|PPIA_MACMU	R.IIPGFM*CQGGDFTR.H
sp|P62940|PPIA_MACMU	R.IIPGFMCQGGDFTR.H
sp|P62940|PPIA_MACMU	R.VSFELFADKVPK.T
sp|P63108|HBA_MACMU	A.GEYGAEALER.M
sp|P63108|HBA_MACMU	F.LASVSTVLTSK.Y
sp|P63108|HBA_MACMU	G.EYGAEALER.M
sp|P63108|HBA_MACMU	G.GHAGEYGAEALER.M
sp|P63108|HBA_MACMU	G.HAGEYGAEALER.M
sp|P63108|HBA_MACMU	G.KVGGHAGEYGAEALER.M
sp|P63108|HBA_MACMU	H.AGEYGAEALER.M
sp|P63108|HBA_MACMU	K.FLASVSTVLTSK.Y
sp|P63108|HBA_MACMU	K.FLASVSTVLTSKY.R
sp|P63108|HBA_MACMU	K.KVADALTLAVGHVDDM*PNALSALSDLHAHK.L
sp|P63108|HBA_MACMU	K.KVADALTLAVGHVDDMPN.A
sp|P63108|HBA_MACMU	K.LRVDPVNFK.L
sp|P63108|HBA_MACMU	K.TYFPHFDLSHG.S
sp|P63108|HBA_MACMU	K.TYFPHFDLSHGSAQVK.G
sp|P63108|HBA_MACMU	K.TYFPHFDLSHGSAQVKG.H
sp|P63108|HBA_MACMU	K.VADALTLAVG.H
sp|P63108|HBA_MACMU	K.VADALTLAVGHVD.D
sp|P63108|HBA_MACMU	K.VADALTLAVGHVDDM*PNALSAL.S
sp|P63108|HBA_MACMU	K.VADALTLAVGHVDDM*PNALSALSDLHA.H
sp|P63108|HBA_MACMU	K.VADALTLAVGHVDDM*PNALSALSDLHAHK.L
sp|P63108|HBA_MACMU	K.VADALTLAVGHVDDMPNALSALSDLHAHK.L
sp|P63108|HBA_MACMU	K.VADALTLAVGHVDDMPNALSALSDLHAHKLR.V
sp|P63108|HBA_MACMU	K.VGGHAGE.Y
sp|P63108|HBA_MACMU	K.VGGHAGEY.G
sp|P63108|HBA_MACMU	K.VGGHAGEYG.A
sp|P63108|HBA_MACMU	K.VGGHAGEYGA.E
sp|P63108|HBA_MACMU	K.VGGHAGEYGAE.A
sp|P63108|HBA_MACMU	K.VGGHAGEYGAEA.L
sp|P63108|HBA_MACMU	K.VGGHAGEYGAEAL.E
sp|P63108|HBA_MACMU	K.VGGHAGEYGAEALE.R
sp|P63108|HBA_MACMU	K.VGGHAGEYGAEALER.M
sp|P63108|HBA_MACMU	K.VGGHAGEYGAEALERMFLSF.P
sp|P63108|HBA_MACMU	M.VLSPADKSNVK.A
sp|P63108|HBA_MACMU	R.M*FLSFPT.T
sp|P63108|HBA_MACMU	R.M*FLSFPTTK.T
sp|P63108|HBA_MACMU	R.MFLSFPT.T
sp|P63108|HBA_MACMU	R.MFLSFPTT.K
sp|P63108|HBA_MACMU	R.MFLSFPTTK.T
sp|P63108|HBA_MACMU	R.MFLSFPTTKTYFPHFDLSHGS.A
sp|P63108|HBA_MACMU	R.VDPVNFK.L
sp|P63108|HBA_MACMU	V.GGHAGEYGAEALER.M
sp|P63303|SELW_MACMU	K.KLEDEFPGR.L
sp|P67997|PRIO_MACMU	A.VVGGLGGYM*LGSAMSRPLIHFGNDYEDR.Y
sp|P67997|PRIO_MACMU	A.VVGGLGGYMLGSAM*SRPLIHFGNDYEDR.Y
sp|P67997|PRIO_MACMU	A.VVGGLGGYMLGSAMSR.P
sp|P67997|PRIO_MACMU	A.VVGGLGGYMLGSAMSRPLIHFGNDYEDR.Y
sp|P67997|PRIO_MACMU	F.GNDYEDRYYR.E
sp|P67997|PRIO_MACMU	I.HFGNDYEDR.Y
sp|P67997|PRIO_MACMU	K.ESQAYYQR.G
sp|P67997|PRIO_MACMU	K.GENFTETDVK.M
sp|P67997|PRIO_MACMU	K.HMAGAAAAGA.V
sp|P67997|PRIO_MACMU	K.PGGWNTGGSR.Y
sp|P67997|PRIO_MACMU	K.QHTVTTTTK.G
sp|P67997|PRIO_MACMU	K.QHTVTTTTKGENFTETDVK.M
sp|P67997|PRIO_MACMU	L.IHFGNDYEDR.Y
sp|P67997|PRIO_MACMU	M.CITQYEKESQAYYQR.G
sp|P67997|PRIO_MACMU	M.SRPLIHFGNDYEDR.Y
sp|P67997|PRIO_MACMU	P.GGWNTGGSR.Y
sp|P67997|PRIO_MACMU	P.LIHFGNDYEDR.Y
sp|P67997|PRIO_MACMU	R.ENMYRYPNQVY.Y
sp|P67997|PRIO_MACMU	R.PLIHFGNDYEDR.Y
sp|P67997|PRIO_MACMU	R.PLIHFGNDYEDRYYR.E
sp|P67997|PRIO_MACMU	R.VVEQM*CIT.Q
sp|P67997|PRIO_MACMU	R.VVEQM*CITQ.Y
sp|P67997|PRIO_MACMU	R.VVEQM*CITQY.E
sp|P67997|PRIO_MACMU	R.VVEQM*CITQYEK.E
sp|P67997|PRIO_MACMU	R.VVEQM*CITQYEKESQA.Y
sp|P67997|PRIO_MACMU	R.VVEQM*CITQYEKESQAY.Y
sp|P67997|PRIO_MACMU	R.VVEQM*CITQYEKESQAYY.Q
sp|P67997|PRIO_MACMU	R.VVEQM*CITQYEKESQAYYQR.G
sp|P67997|PRIO_MACMU	R.VVEQMC.I
sp|P67997|PRIO_MACMU	R.VVEQMCIT.Q
sp|P67997|PRIO_MACMU	R.VVEQMCITQ.Y
sp|P67997|PRIO_MACMU	R.VVEQMCITQY.E
sp|P67997|PRIO_MACMU	R.VVEQMCITQYE.K
sp|P67997|PRIO_MACMU	R.VVEQMCITQYEK.E
sp|P67997|PRIO_MACMU	R.VVEQMCITQYEKE.S
sp|P67997|PRIO_MACMU	R.VVEQMCITQYEKESQ.A
sp|P67997|PRIO_MACMU	R.VVEQMCITQYEKESQA.Y
sp|P67997|PRIO_MACMU	R.VVEQMCITQYEKESQAY.Y
sp|P67997|PRIO_MACMU	R.VVEQMCITQYEKESQAYY.Q
sp|P67997|PRIO_MACMU	R.VVEQMCITQYEKESQAYYQR.G
sp|P67997|PRIO_MACMU	R.VVEQMCITQYEKESQAYYQRGSSM*VLF.S
sp|P67997|PRIO_MACMU	R.YPGQGSPGG.N
sp|P67997|PRIO_MACMU	R.YPGQGSPGGN.R
sp|P67997|PRIO_MACMU	R.YPGQGSPGGNR.Y
sp|P67997|PRIO_MACMU	R.YPNQVY.Y
sp|P67997|PRIO_MACMU	R.YYRENM*YR.Y
sp|P67997|PRIO_MACMU	R.YYRENMYR.Y
sp|P67997|PRIO_MACMU	Y.EKESQAYYQR.G
sp|P68077|HBG_MACMU	K.EFTPEVQASWQK.M
sp|P68077|HBG_MACMU	K.GTFAQLSELHCDKLHVDPENFR.L
sp|P68077|HBG_MACMU	K.LHVDPENFR.L
sp|P68077|HBG_MACMU	K.VNVEDAGGETLGR.L
sp|P68077|HBG_MACMU	R.FFDSFGNLSSASAIMGNPK.V
sp|P68110|FIBA_MACMU	-.ADTGEGDFLAEGGGV.R
sp|P68110|FIBA_MACMU	-.ADTGEGDFLAEGGGVR.-
sp|P68110|FIBA_MACMU	A.DTGEGDFLAEGGGVR.-
sp|P68110|FIBA_MACMU	E.GDFLAEGGGVR.-
sp|P68110|FIBA_MACMU	G.DFLAEGGGVR.-
sp|P69895|TBB5_MACMU	-.GHYTEGAELVDSVLDVVR.K
sp|P69895|TBB5_MACMU	-.GHYTEGAELVDSVLDVVRK.E
sp|P69895|TBB5_MACMU	K.EAESCDCLQGFQLTHSLGGGTGSGMGTLLISK.I
sp|P69895|TBB5_MACMU	K.EVDEQM*LNVQNK.N
sp|P69895|TBB5_MACMU	K.EVDEQMLNVQNK.N
sp|P69895|TBB5_MACMU	K.FWEVISDEHGIDPTGTYHGDSDLQLDR.I
sp|P69895|TBB5_MACMU	K.IREEYPDR.I
sp|P69895|TBB5_MACMU	K.LAVNMVPFPR.L
sp|P69895|TBB5_MACMU	K.LTTPTYGDLNHLVSATMSGVTTCLR.F
sp|P69895|TBB5_MACMU	K.M*AVTFIGNSTAIQELFK.R
sp|P69895|TBB5_MACMU	K.MAVTFIGNSTAIQELFK.R
sp|P69895|TBB5_MACMU	K.NM*M*AACDPR.H
sp|P69895|TBB5_MACMU	K.NM*MAACDPR.H
sp|P69895|TBB5_MACMU	K.NMM*AACDPR.H
sp|P69895|TBB5_MACMU	K.NMMAACDPR.H
sp|P69895|TBB5_MACMU	K.NSSYFVEWIPNNVK.T
sp|P69895|TBB5_MACMU	K.TAVCDIPPR.G
sp|P69895|TBB5_MACMU	K.VSDTVVEPYNATLS.I
sp|P69895|TBB5_MACMU	R.AILVDLEPGTM*DSVR.S
sp|P69895|TBB5_MACMU	R.AILVDLEPGTMDSVR.S
sp|P69895|TBB5_MACMU	R.ALTVPELTQQVFDAK.N
sp|P69895|TBB5_MACMU	R.EIVHIQAGQCGNQIGAK.F
sp|P69895|TBB5_MACMU	R.FPGQLNADLR.K
sp|P69895|TBB5_MACMU	R.IM*NTFSVVPSPK.V
sp|P69895|TBB5_MACMU	R.IMNTFSVVPSPK.V
sp|P69895|TBB5_MACMU	R.ISEQFTAM*FR.R
sp|P69895|TBB5_MACMU	R.ISEQFTAMFR.R
sp|P69895|TBB5_MACMU	R.ISVYYNEATGGK.Y
sp|P69895|TBB5_MACMU	R.LHFFM*PGFAPLTSR.G
sp|P69895|TBB5_MACMU	R.LHFFMPGFAPLTSR.G
sp|P69895|TBB5_MACMU	R.SGPFGQIFRPDNFVFGQSGAGNNWAK.G
sp|P69895|TBB5_MACMU	R.YLTVAAVFR.G
sp|P69895|TBB5_MACMU	T.EGAELVDSVLDVVR.K
sp|P69895|TBB5_MACMU	T.EGAELVDSVLDVVRK.E
sp|P69895|TBB5_MACMU	V.DLEPGTM*DSVR.S
sp|P69895|TBB5_MACMU	Y.TEGAELVDSVLDVVR.K
sp|P82317|DEF2_MACMU	R.YGTCFYM*GR.V
sp|P82319|DEF4_MACMU	R.ESYSGSCNINGR.I
sp|Q1WK23|PRS23_MACMU	K.GTPLPTYEEAK.Q
sp|Q28502|APOE_MACMU	A.YKSELEEQLSPVAEETR.A
sp|Q28502|APOE_MACMU	E.QLSPVAEETR.A
sp|Q28502|APOE_MACMU	K.AYKSELEEQL.S
sp|Q28502|APOE_MACMU	K.AYKSELEEQLS.P
sp|Q28502|APOE_MACMU	K.AYKSELEEQLSPV.A
sp|Q28502|APOE_MACMU	K.AYKSELEEQLSPVA.E
sp|Q28502|APOE_MACMU	K.AYKSELEEQLSPVAE.E
sp|Q28502|APOE_MACMU	K.AYKSELEEQLSPVAEE.T
sp|Q28502|APOE_MACMU	K.AYKSELEEQLSPVAEETR.A
sp|Q28502|APOE_MACMU	K.AYKSELEEQLSPVAEETRA.R
sp|Q28502|APOE_MACMU	K.AYKSELEEQLSPVAEETRAR.L
sp|Q28502|APOE_MACMU	K.ELQAAQAR.L
sp|Q28502|APOE_MACMU	K.SELEEQLSPVAEET.R
sp|Q28502|APOE_MACMU	K.SELEEQLSPVAEETR.A
sp|Q28502|APOE_MACMU	K.SELEEQLSPVAEETRAR.L
sp|Q28502|APOE_MACMU	M.LGQSTEELR.A
sp|Q28502|APOE_MACMU	M.LGQSTEELRARLASHLRK.L
sp|Q28502|APOE_MACMU	Q.LSPVAEETR.A
sp|Q28502|APOE_MACMU	Q.VTQELTTLMDETMK.E
sp|Q28502|APOE_MACMU	R.DADDLQK.R
sp|Q28502|APOE_MACMU	R.DADDLQKR.-
sp|Q28502|APOE_MACMU	R.LGADM*EDVR.S
sp|Q28502|APOE_MACMU	R.LGADM*EDVRS.R
sp|Q28502|APOE_MACMU	R.LGADM*EDVRSR.L
sp|Q28502|APOE_MACMU	R.LGADMEDVR.S
sp|Q28502|APOE_MACMU	R.LGADMEDVRS.R
sp|Q28502|APOE_MACMU	R.LGADMEDVRSR.L
sp|Q28502|APOE_MACMU	R.LGADMEDVRSRLVQYRSEVQAMLG.Q
sp|Q28502|APOE_MACMU	R.LGADMEDVRSRLVQYRSEVQAMLGQ.S
sp|Q28502|APOE_MACMU	R.LLRDADDLQK.R
sp|Q28502|APOE_MACMU	R.LLRDADDLQKR.-
sp|Q28502|APOE_MACMU	R.LSKELQAAQAR.L
sp|Q28502|APOE_MACMU	R.LSKELQAAQARLGADMEDVR.S
sp|Q28502|APOE_MACMU	R.LVQYRSEVQAM*LGQSTEELR.A
sp|Q28502|APOE_MACMU	R.LVQYRSEVQAMLGQSTEELR.A
sp|Q28502|APOE_MACMU	R.LVQYRSEVQAMLGQSTEELRAR.L
sp|Q28502|APOE_MACMU	R.SEVQAM*LGQSTEELR.A
sp|Q28502|APOE_MACMU	R.SEVQAM*LGQSTEELRAR.L
sp|Q28502|APOE_MACMU	R.SEVQAMLG.Q
sp|Q28502|APOE_MACMU	R.SEVQAMLGQ.S
sp|Q28502|APOE_MACMU	R.SEVQAMLGQSTEELR.A
sp|Q28502|APOE_MACMU	R.SEVQAMLGQSTEELRAR.L
sp|Q28502|APOE_MACMU	R.SEVQAMLGQSTEELRARLASH.L
sp|Q28502|APOE_MACMU	Y.KSELEEQLSPVAEETR.A
sp|Q28502|APOE_MACMU	Y.RSEVQAM*LGQSTEELR.A
sp|Q28502|APOE_MACMU	Y.RSEVQAMLGQSTEELR.A
sp|Q28506|PROC_MACMU	K.STTDNDIALLR.L
sp|Q28506|PROC_MACMU	R.ELTQAGQETLVTGWGYHSSR.E
sp|Q28506|PROC_MACMU	R.LAQPATLSQTIVPICLPDSGLAER.E
sp|Q28506|PROC_MACMU	R.TFILNFIK.I
sp|Q28507|HBE_MACMU	K.EFTPEVQAAWQK.L
sp|Q28507|HBE_MACMU	K.EFTPEVQAAWQKLVSAVAIAL.A
sp|Q28507|HBE_MACMU	R.LLVVYPWTQ.R
sp|Q28507|HBE_MACMU	R.LLVVYPWTQR.F
sp|Q28514|GSTP1_MACMU	K.AFLASPEHVNLPINGNGKQ.-
sp|Q28514|GSTP1_MACMU	K.ALPGQLKPFETLLSQNQGGK.T
sp|Q28514|GSTP1_MACMU	K.ASCLYGQLPK.F
sp|Q28514|GSTP1_MACMU	K.FQDGDLTLYQ.S
sp|Q28514|GSTP1_MACMU	K.FQDGDLTLYQSNTFLR.H
sp|Q28514|GSTP1_MACMU	K.YLSLIYTNYEAGKDDYVK.A
sp|Q28514|GSTP1_MACMU	R.EAALVDM*VNDGVEDLR.C
sp|Q28514|GSTP1_MACMU	R.EAALVDMVNDGVEDLR.C
sp|Q28514|GSTP1_MACMU	R.M*LLADQGQSWKEEVVTMETWQEGSLK.A
sp|Q28514|GSTP1_MACMU	R.MLLADQGQSWKEEVVTM*ETWQEGSLK.A
sp|Q28514|GSTP1_MACMU	R.MLLADQGQSWKEEVVTMETWQEGSLK.A
sp|Q28514|GSTP1_MACMU	R.TLGLYGK.D
sp|Q28514|GSTP1_MACMU	R.TLGLYGKDQR.E
sp|Q28514|GSTP1_MACMU	Y.TVVYFPVR.G
sp|Q28520|PROS_MACMU	F.AVSLVDSTSEK.S
sp|Q28520|PROS_MACMU	K.DCKDVDECSLKPN.M
sp|Q28520|PROS_MACMU	K.DCKDVDECSLKPNMCGTAVCK.N
sp|Q28520|PROS_MACMU	K.DVDECSLKPNM*CGTAVCK.N
sp|Q28520|PROS_MACMU	K.DVDECSLKPNMCGTAVCK.N
sp|Q28520|PROS_MACMU	K.EAVMDINKPGPLFKPENGLLETK.V
sp|Q28520|PROS_MACMU	K.FRLPEISR.F
sp|Q28520|PROS_MACMU	K.HCLVTVEK.G
sp|Q28520|PROS_MACMU	K.IETISQEELQTQLAILDK.A
sp|Q28520|PROS_MACMU	K.IETISQEELQTQLAILDKAMKG.K
sp|Q28520|PROS_MACMU	K.IEVQLKNEHTSK.I
sp|Q28520|PROS_MACMU	K.ITTGGDIINNGLWNM*VSVEELEHSISIK.I
sp|Q28520|PROS_MACMU	K.ITTGGDIINNGLWNM*VSVEELEHSISIKIAKEA.V
sp|Q28520|PROS_MACMU	K.ITTGGDIINNGLWNMVSVEELEHSISIK.I
sp|Q28520|PROS_MACMU	K.NIPGDFECECPEGYR.Y
sp|Q28520|PROS_MACMU	K.NIPGDFECECPEGYRYNLK.S
sp|Q28520|PROS_MACMU	K.QGASGIKEIIQEK.Q
sp|Q28520|PROS_MACMU	K.QNKHCLVTVEK.G
sp|Q28520|PROS_MACMU	K.QQASQVLV.R
sp|Q28520|PROS_MACMU	K.SCEAVSVCLPL.L
sp|Q28520|PROS_MACMU	K.SCEAVSVCLPLNLDTK.Y
sp|Q28520|PROS_MACMU	K.SCEAVSVCLPLNLDTKYELLYLAEQFAGVVLYLK.F
sp|Q28520|PROS_MACMU	K.SGFVM*LSNK.K
sp|Q28520|PROS_MACMU	K.SGFVM*LSNKK.D
sp|Q28520|PROS_MACMU	K.SGFVMLSNK.K
sp|Q28520|PROS_MACMU	K.SGFVMLSNKK.D
sp|Q28520|PROS_MACMU	K.SQDIVISVENTVIYR.I
sp|Q28520|PROS_MACMU	K.VATYLGGLPDVPFSATPVNAFYNGCM*EVNINGVELDLDEAISK.H
sp|Q28520|PROS_MACMU	K.VYFAGFP.R
sp|Q28520|PROS_MACMU	K.VYFAGFPR.K
sp|Q28520|PROS_MACMU	N.MVSVEELEHSISIK.I
sp|Q28520|PROS_MACMU	N.NLELLTPLKIETISQEELQTQLAILDK.A
sp|Q28520|PROS_MACMU	R.AHSCPSVWK.K
sp|Q28520|PROS_MACMU	R.FSAEFDFR.T
sp|Q28520|PROS_MACMU	R.KVESELIKPINPR.L
sp|Q28520|PROS_MACMU	R.NNLELLTPL.K
sp|Q28520|PROS_MACMU	R.NNLELLTPLK.I
sp|Q28520|PROS_MACMU	R.NNLELLTPLKIETISQEELQTQLAILDK.A
sp|Q28520|PROS_MACMU	R.NNLELLTPLKIETISQEELQTQLAILDKAMKGK.V
sp|Q28520|PROS_MACMU	R.QSTDAYPDLR.S
sp|Q28520|PROS_MACMU	R.SCVNAIPDQCSPLPCNEDGYM*SCK.D
sp|Q28520|PROS_MACMU	R.SCVNAIPDQCSPLPCNEDGYM*SCKDGK.A
sp|Q28520|PROS_MACMU	R.SCVNAIPDQCSPLPCNEDGYM*SCKDGKASFTC.T
sp|Q28520|PROS_MACMU	R.SCVNAIPDQCSPLPCNEDGYMSCK.D
sp|Q28520|PROS_MACMU	R.SCVNAIPDQCSPLPCNEDGYMSCKDGK.A
sp|Q28520|PROS_MACMU	R.SFQSGLFTAAR.Q
sp|Q28520|PROS_MACMU	R.SWNLM*K.Q
sp|Q28520|PROS_MACMU	R.SWNLMK.Q
sp|Q28520|PROS_MACMU	R.VNRNNLELLTPLK.I
sp|Q28520|PROS_MACMU	R.VNRNNLELLTPLKIETISQEELQTQLAILDK.A
sp|Q28521|ROA1_MACMU	K.IEVIEIMTDR.G
sp|Q28521|ROA1_MACMU	K.LFIGGLSFETTDESLR.S
sp|Q28521|ROA1_MACMU	K.SESPKEPEQLR.K
sp|Q28521|ROA1_MACMU	K.YHTVNGHNCEVR.K
sp|Q28521|ROA1_MACMU	R.NQGGYGGSSSSSSYGSGR.R
sp|Q28522|ALBU_MACMU	A.AADPHECYAK.V
sp|Q28522|ALBU_MACMU	A.ADPHECYAK.V
sp|Q28522|ALBU_MACMU	A.DDKEACFAEEGPK.F
sp|Q28522|ALBU_MACMU	A.DESAENCDK.S
sp|Q28522|ALBU_MACMU	A.DLPSLAADYVESK.D
sp|Q28522|ALBU_MACMU	A.DMCTLSEKEK.Q
sp|Q28522|ALBU_MACMU	A.DPHECYAK.V
sp|Q28522|ALBU_MACMU	A.ECCQAADK.A
sp|Q28522|ALBU_MACMU	A.EDYLSVVLNR.L
sp|Q28522|ALBU_MACMU	A.EVENDEMPADLPSLAADYVESK.D
sp|Q28522|ALBU_MACMU	A.FAECCQAADK.A
sp|Q28522|ALBU_MACMU	A.FAECCQAADKAACLLPK.L
sp|Q28522|ALBU_MACMU	A.FHDNEATFLK.K
sp|Q28522|ALBU_MACMU	A.FSQYLQQCPFEEHVK.L
sp|Q28522|ALBU_MACMU	A.KAYEATLEK.C
sp|Q28522|ALBU_MACMU	A.KTCVADESAENCDK.S
sp|Q28522|ALBU_MACMU	A.KVFDEFQPLVEEPQNLVK.Q
sp|Q28522|ALBU_MACMU	A.LELDEAYVPK.A
sp|Q28522|ALBU_MACMU	A.TLRETYGEMADCCAK.Q
sp|Q28522|ALBU_MACMU	C.AAADPHECYAK.V
sp|Q28522|ALBU_MACMU	C.AEDYLSVVLNR.L
sp|Q28522|ALBU_MACMU	C.AEDYLSVVLNRLCVLHEK.T
sp|Q28522|ALBU_MACMU	C.CAAADPHECYAK.V
sp|Q28522|ALBU_MACMU	C.CDKPLLEK.S
sp|Q28522|ALBU_MACMU	C.CHGDLLECADDR.A
sp|Q28522|ALBU_MACMU	C.CHGDLLECADDRADLAK.Y
sp|Q28522|ALBU_MACMU	C.CKADDKEACFAEEGPK.F
sp|Q28522|ALBU_MACMU	C.CQAADKAACLLPK.L
sp|Q28522|ALBU_MACMU	C.CTESLVNR.R
sp|Q28522|ALBU_MACMU	C.ELFEQLGEYK.F
sp|Q28522|ALBU_MACMU	C.ELFEQLGEYKFQNALLVR.Y
sp|Q28522|ALBU_MACMU	C.ENQDSISSK.L
sp|Q28522|ALBU_MACMU	C.FSALELDEAYVPK.A
sp|Q28522|ALBU_MACMU	C.HGDLLECADDR.A
sp|Q28522|ALBU_MACMU	C.HGDLLECADDRADLAK.Y
sp|Q28522|ALBU_MACMU	C.LAEVENDEM*PADLPSLAADYVESK.D
sp|Q28522|ALBU_MACMU	C.LAEVENDEMPADLPSLAADYVESK.D
sp|Q28522|ALBU_MACMU	C.TAFHDNEATFLK.K
sp|Q28522|ALBU_MACMU	C.TAFHDNEATFLKK.Y
sp|Q28522|ALBU_MACMU	C.VADESAENCDK.S
sp|Q28522|ALBU_MACMU	D.DKEACFAEEGPK.F
sp|Q28522|ALBU_MACMU	D.EFQPLVEEPQNLVK.Q
sp|Q28522|ALBU_MACMU	D.EM*PADLPSLAADYVESK.D
sp|Q28522|ALBU_MACMU	D.EMPADLPSLAADYVESK.D
sp|Q28522|ALBU_MACMU	D.ESAENCDK.S
sp|Q28522|ALBU_MACMU	D.KEACFAEEGPK.F
sp|Q28522|ALBU_MACMU	D.KLCTVATLR.E
sp|Q28522|ALBU_MACMU	D.LLECADDR.A
sp|Q28522|ALBU_MACMU	D.LLECADDRADLAK.Y
sp|Q28522|ALBU_MACMU	D.LPSLAADYVESK.D
sp|Q28522|ALBU_MACMU	D.MCTLSEKEK.Q
sp|Q28522|ALBU_MACMU	D.NFAAFVEK.C
sp|Q28522|ALBU_MACMU	D.NPNLPPLVRPEVDVMCTAFHDNEATFLK.K
sp|Q28522|ALBU_MACMU	D.PHECYAK.V
sp|Q28522|ALBU_MACMU	E.ACFAEEGPK.F
sp|Q28522|ALBU_MACMU	E.CADDRADLAK.Y
sp|Q28522|ALBU_MACMU	E.CCDKPLLEK.S
sp|Q28522|ALBU_MACMU	E.CCHGDLLECADDR.A
sp|Q28522|ALBU_MACMU	E.CCHGDLLECADDRADLAK.Y
sp|Q28522|ALBU_MACMU	E.CCQAADK.A
sp|Q28522|ALBU_MACMU	E.CCQAADKAACLLPK.L
sp|Q28522|ALBU_MACMU	E.DYLSVVLNR.L
sp|Q28522|ALBU_MACMU	E.FQPLVEEPQNLVK.Q
sp|Q28522|ALBU_MACMU	E.LDEAYVPK.A
sp|Q28522|ALBU_MACMU	E.M*PADLPSLAADYVESK.D
sp|Q28522|ALBU_MACMU	E.MPADLPSLAADYVESK.D
sp|Q28522|ALBU_MACMU	E.NCDKSLHTLFGDK.L
sp|Q28522|ALBU_MACMU	E.NDEM*PADLPSLAADYVESK.D
sp|Q28522|ALBU_MACMU	E.NDEMPADLPSLAADYVESK.D
sp|Q28522|ALBU_MACMU	E.NQDSISSK.L
sp|Q28522|ALBU_MACMU	E.TYGEM*ADCCAK.Q
sp|Q28522|ALBU_MACMU	E.TYGEMADCCAK.Q
sp|Q28522|ALBU_MACMU	E.VENDEM*PADLPSLAADYVESK.D
sp|Q28522|ALBU_MACMU	E.VENDEMPADLPSLAADYVESK.D
sp|Q28522|ALBU_MACMU	F.AECCQAADK.A
sp|Q28522|ALBU_MACMU	F.AKTCVADESAENCDK.S
sp|Q28522|ALBU_MACMU	F.DEFQPLVEEPQNLVK.Q
sp|Q28522|ALBU_MACMU	F.GDKLCTVATLR.E
sp|Q28522|ALBU_MACMU	F.HADM*CTLSEK.E
sp|Q28522|ALBU_MACMU	F.HADM*CTLSEKEK.Q
sp|Q28522|ALBU_MACMU	F.HADMCTLSEK.E
sp|Q28522|ALBU_MACMU	F.HADMCTLSEKEK.Q
sp|Q28522|ALBU_MACMU	F.HDNEATFLK.K
sp|Q28522|ALBU_MACMU	F.LGM*FLYEYAR.R
sp|Q28522|ALBU_MACMU	F.LGMFLYEYAR.R
sp|Q28522|ALBU_MACMU	F.NAETFTFHADM*CTLSEKEK.Q
sp|Q28522|ALBU_MACMU	F.NAETFTFHADMCTLSEKEK.Q
sp|Q28522|ALBU_MACMU	F.QPLVEEPQNLVK.Q
sp|Q28522|ALBU_MACMU	F.SALELDEAYVPK.A
sp|Q28522|ALBU_MACMU	F.SQYLQQCPFEEHVK.L
sp|Q28522|ALBU_MACMU	F.SQYLQQCPFEEHVKLVNEVTEFAK.T
sp|Q28522|ALBU_MACMU	F.TFHADM*CTLSEK.E
sp|Q28522|ALBU_MACMU	F.TFHADM*CTLSEKEK.Q
sp|Q28522|ALBU_MACMU	F.TFHADMCTLSEK.E
sp|Q28522|ALBU_MACMU	F.TFHADMCTLSEKEK.Q
sp|Q28522|ALBU_MACMU	F.YAPELLFFAAR.Y
sp|Q28522|ALBU_MACMU	G.DKLCTVATLR.E
sp|Q28522|ALBU_MACMU	G.DLLECADDRADLAK.Y
sp|Q28522|ALBU_MACMU	G.EM*ADCCAK.Q
sp|Q28522|ALBU_MACMU	G.EMADCCAK.Q
sp|Q28522|ALBU_MACMU	G.LVLVAFSQYLQQCPFEEHVK.L
sp|Q28522|ALBU_MACMU	G.MFLYEYAR.R
sp|Q28522|ALBU_MACMU	H.ADMCTLSEK.E
sp|Q28522|ALBU_MACMU	H.ADMCTLSEKEK.Q
sp|Q28522|ALBU_MACMU	H.CLAEVENDEM*PADLPSLAADYVESK.D
sp|Q28522|ALBU_MACMU	H.CLAEVENDEMPADLPSLAADYVESK.D
sp|Q28522|ALBU_MACMU	H.DNEATFLK.K
sp|Q28522|ALBU_MACMU	H.GDLLECADDRADLAK.Y
sp|Q28522|ALBU_MACMU	H.TECCHGDLLECADDR.A
sp|Q28522|ALBU_MACMU	H.TECCHGDLLECADDRADLAK.Y
sp|Q28522|ALBU_MACMU	H.TLFGDKLCTVATLR.E
sp|Q28522|ALBU_MACMU	K.AACLLPK.L
sp|Q28522|ALBU_MACMU	K.AACLLPKLDELR.D
sp|Q28522|ALBU_MACMU	K.AACLLPKLDELRDEGK.A
sp|Q28522|ALBU_MACMU	K.AACLLPKLDELRDEGKASSAK.Q
sp|Q28522|ALBU_MACMU	K.AAFAECC.Q
sp|Q28522|ALBU_MACMU	K.AAFAECCQ.A
sp|Q28522|ALBU_MACMU	K.AAFAECCQA.A
sp|Q28522|ALBU_MACMU	K.AAFAECCQAA.D
sp|Q28522|ALBU_MACMU	K.AAFAECCQAAD.K
sp|Q28522|ALBU_MACMU	K.AAFAECCQAADK.A
sp|Q28522|ALBU_MACMU	K.AAFAECCQAADKA.A
sp|Q28522|ALBU_MACMU	K.AAFAECCQAADKAA.C
sp|Q28522|ALBU_MACMU	K.AAFAECCQAADKAAC.L
sp|Q28522|ALBU_MACMU	K.AAFAECCQAADKAACLL.P
sp|Q28522|ALBU_MACMU	K.AAFAECCQAADKAACLLP.K
sp|Q28522|ALBU_MACMU	K.AAFAECCQAADKAACLLPK.L
sp|Q28522|ALBU_MACMU	K.AAFAECCQAADKAACLLPKLDELR.D
sp|Q28522|ALBU_MACMU	K.AAFAECCQAADKAACLLPKLDELRDEG.K
sp|Q28522|ALBU_MACMU	K.AAFAECCQAADKAACLLPKLDELRDEGK.A
sp|Q28522|ALBU_MACMU	K.ADDKEACFA.E
sp|Q28522|ALBU_MACMU	K.ADDKEACFAE.E
sp|Q28522|ALBU_MACMU	K.ADDKEACFAEE.G
sp|Q28522|ALBU_MACMU	K.ADDKEACFAEEG.P
sp|Q28522|ALBU_MACMU	K.ADDKEACFAEEGP.K
sp|Q28522|ALBU_MACMU	K.ADDKEACFAEEGPK.F
sp|Q28522|ALBU_MACMU	K.ADDKEACFAEEGPKF.V
sp|Q28522|ALBU_MACMU	K.ADDKEACFAEEGPKFV.A
sp|Q28522|ALBU_MACMU	K.ADDKEACFAEEGPKFVAA.S
sp|Q28522|ALBU_MACMU	K.ADDKEACFAEEGPKFVAAS.Q
sp|Q28522|ALBU_MACMU	K.ADDKEACFAEEGPKFVAASQ.A
sp|Q28522|ALBU_MACMU	K.ADDKEACFAEEGPKFVAASQA.A
sp|Q28522|ALBU_MACMU	K.ADDKEACFAEEGPKFVAASQAA.L
sp|Q28522|ALBU_MACMU	K.ADDKEACFAEEGPKFVAASQAAL.A
sp|Q28522|ALBU_MACMU	K.ADDKEACFAEEGPKFVAASQAALA.-
sp|Q28522|ALBU_MACMU	K.AEFAEVSK.L
sp|Q28522|ALBU_MACMU	K.AEFAEVSKL.V
sp|Q28522|ALBU_MACMU	K.AEFAEVSKLVTD.L
sp|Q28522|ALBU_MACMU	K.AEFAEVSKLVTDLT.K
sp|Q28522|ALBU_MACMU	K.AEFAEVSKLVTDLTK.V
sp|Q28522|ALBU_MACMU	K.AEFAEVSKLVTDLTKVHT.E
sp|Q28522|ALBU_MACMU	K.AEFAEVSKLVTDLTKVHTEC.C
sp|Q28522|ALBU_MACMU	K.AFNAETF.T
sp|Q28522|ALBU_MACMU	K.AFNAETFT.F
sp|Q28522|ALBU_MACMU	K.AFNAETFTF.H
sp|Q28522|ALBU_MACMU	K.AFNAETFTFH.A
sp|Q28522|ALBU_MACMU	K.AFNAETFTFHA.D
sp|Q28522|ALBU_MACMU	K.AFNAETFTFHAD.M
sp|Q28522|ALBU_MACMU	K.AFNAETFTFHADM*.C
sp|Q28522|ALBU_MACMU	K.AFNAETFTFHADM*C.T
sp|Q28522|ALBU_MACMU	K.AFNAETFTFHADM*CT.L
sp|Q28522|ALBU_MACMU	K.AFNAETFTFHADM*CTL.S
sp|Q28522|ALBU_MACMU	K.AFNAETFTFHADM*CTLS.E
sp|Q28522|ALBU_MACMU	K.AFNAETFTFHADM*CTLSEK.E
sp|Q28522|ALBU_MACMU	K.AFNAETFTFHADM*CTLSEKEK.Q
sp|Q28522|ALBU_MACMU	K.AFNAETFTFHADM*CTLSEKEKQV.K
sp|Q28522|ALBU_MACMU	K.AFNAETFTFHADM.C
sp|Q28522|ALBU_MACMU	K.AFNAETFTFHADMC.T
sp|Q28522|ALBU_MACMU	K.AFNAETFTFHADMCTL.S
sp|Q28522|ALBU_MACMU	K.AFNAETFTFHADMCTLS.E
sp|Q28522|ALBU_MACMU	K.AFNAETFTFHADMCTLSEK.E
sp|Q28522|ALBU_MACMU	K.AFNAETFTFHADMCTLSEKEK.Q
sp|Q28522|ALBU_MACMU	K.AFNAETFTFHADMCTLSEKEKQV.K
sp|Q28522|ALBU_MACMU	K.AFNAETFTFHADMCTLSEKEKQVK.K
sp|Q28522|ALBU_MACMU	K.AFNAETFTFHADMCTLSEKEKQVKKQTAL.V
sp|Q28522|ALBU_MACMU	K.ATKEQLK.A
sp|Q28522|ALBU_MACMU	K.ATKEQLKGVMDNFAAFVEK.C
sp|Q28522|ALBU_MACMU	K.AYEATLE.K
sp|Q28522|ALBU_MACMU	K.AYEATLEK.C
sp|Q28522|ALBU_MACMU	K.AYEATLEKC.C
sp|Q28522|ALBU_MACMU	K.AYEATLEKCCAAADPHE.C
sp|Q28522|ALBU_MACMU	K.AYEATLEKCCAAADPHECYAK.V
sp|Q28522|ALBU_MACMU	K.CASLQKFGDR.A
sp|Q28522|ALBU_MACMU	K.CCAAAD.P
sp|Q28522|ALBU_MACMU	K.CCAAADP.H
sp|Q28522|ALBU_MACMU	K.CCAAADPH.E
sp|Q28522|ALBU_MACMU	K.CCAAADPHE.C
sp|Q28522|ALBU_MACMU	K.CCAAADPHEC.Y
sp|Q28522|ALBU_MACMU	K.CCAAADPHECY.A
sp|Q28522|ALBU_MACMU	K.CCAAADPHECYA.K
sp|Q28522|ALBU_MACMU	K.CCAAADPHECYAK.V
sp|Q28522|ALBU_MACMU	K.CCAAADPHECYAKVF.D
sp|Q28522|ALBU_MACMU	K.CCAAADPHECYAKVFDEF.K
sp|Q28522|ALBU_MACMU	K.CCAAADPHECYAKVFDEFQ.P
sp|Q28522|ALBU_MACMU	K.CCAAADPHECYAKVFDEFQP.L
sp|Q28522|ALBU_MACMU	K.CCAAADPHECYAKVFDEFQPLVEEPQNLVK.Q
sp|Q28522|ALBU_MACMU	K.CCKADDKEA.C
sp|Q28522|ALBU_MACMU	K.CCKADDKEACFAEEG.P
sp|Q28522|ALBU_MACMU	K.CCKADDKEACFAEEGPK.F
sp|Q28522|ALBU_MACMU	K.CCKADDKEACFAEEGPKFVAASQAALA.-
sp|Q28522|ALBU_MACMU	K.CCKLPEAK.R
sp|Q28522|ALBU_MACMU	K.CCKLPEAKR.M
sp|Q28522|ALBU_MACMU	K.CCKLPEAKRMPC.A
sp|Q28522|ALBU_MACMU	K.CCTESLV.N
sp|Q28522|ALBU_MACMU	K.CCTESLVN.R
sp|Q28522|ALBU_MACMU	K.CCTESLVNR.R
sp|Q28522|ALBU_MACMU	K.CCTESLVNRR.P
sp|Q28522|ALBU_MACMU	K.CCTESLVNRRP.C
sp|Q28522|ALBU_MACMU	K.CCTESLVNRRPC.F
sp|Q28522|ALBU_MACMU	K.CCTESLVNRRPCFSALELD.E
sp|Q28522|ALBU_MACMU	K.CCTESLVNRRPCFSALELDE.A
sp|Q28522|ALBU_MACMU	K.CCTESLVNRRPCFSALELDEA.Y
sp|Q28522|ALBU_MACMU	K.CCTESLVNRRPCFSALELDEAYVPK.A
sp|Q28522|ALBU_MACMU	K.CCTESLVNRRPCFSALELDEAYVPKAFNAET.F
sp|Q28522|ALBU_MACMU	K.DDNPNLPP.L
sp|Q28522|ALBU_MACMU	K.DDNPNLPPL.V
sp|Q28522|ALBU_MACMU	K.DDNPNLPPLV.R
sp|Q28522|ALBU_MACMU	K.DDNPNLPPLVR.P
sp|Q28522|ALBU_MACMU	K.DDNPNLPPLVRP.E
sp|Q28522|ALBU_MACMU	K.DDNPNLPPLVRPE.V
sp|Q28522|ALBU_MACMU	K.DDNPNLPPLVRPEVD.V
sp|Q28522|ALBU_MACMU	K.DDNPNLPPLVRPEVDVM*.C
sp|Q28522|ALBU_MACMU	K.DDNPNLPPLVRPEVDVM*C.T
sp|Q28522|ALBU_MACMU	K.DDNPNLPPLVRPEVDVM*CT.A
sp|Q28522|ALBU_MACMU	K.DDNPNLPPLVRPEVDVM*CTA.F
sp|Q28522|ALBU_MACMU	K.DDNPNLPPLVRPEVDVM*CTAF.H
sp|Q28522|ALBU_MACMU	K.DDNPNLPPLVRPEVDVM*CTAFHD.N
sp|Q28522|ALBU_MACMU	K.DDNPNLPPLVRPEVDVM*CTAFHDN.E
sp|Q28522|ALBU_MACMU	K.DDNPNLPPLVRPEVDVM*CTAFHDNEAT.F
sp|Q28522|ALBU_MACMU	K.DDNPNLPPLVRPEVDVM*CTAFHDNEATF.L
sp|Q28522|ALBU_MACMU	K.DDNPNLPPLVRPEVDVM*CTAFHDNEATFLK.K
sp|Q28522|ALBU_MACMU	K.DDNPNLPPLVRPEVDVM*CTAFHDNEATFLKK.Y
sp|Q28522|ALBU_MACMU	K.DDNPNLPPLVRPEVDVM.C
sp|Q28522|ALBU_MACMU	K.DDNPNLPPLVRPEVDVMC.T
sp|Q28522|ALBU_MACMU	K.DDNPNLPPLVRPEVDVMCT.A
sp|Q28522|ALBU_MACMU	K.DDNPNLPPLVRPEVDVMCTA.F
sp|Q28522|ALBU_MACMU	K.DDNPNLPPLVRPEVDVMCTAF.H
sp|Q28522|ALBU_MACMU	K.DDNPNLPPLVRPEVDVMCTAFH.D
sp|Q28522|ALBU_MACMU	K.DDNPNLPPLVRPEVDVMCTAFHD.N
sp|Q28522|ALBU_MACMU	K.DDNPNLPPLVRPEVDVMCTAFHDN.E
sp|Q28522|ALBU_MACMU	K.DDNPNLPPLVRPEVDVMCTAFHDNE.A
sp|Q28522|ALBU_MACMU	K.DDNPNLPPLVRPEVDVMCTAFHDNEA.T
sp|Q28522|ALBU_MACMU	K.DDNPNLPPLVRPEVDVMCTAFHDNEAT.F
sp|Q28522|ALBU_MACMU	K.DDNPNLPPLVRPEVDVMCTAFHDNEATF.L
sp|Q28522|ALBU_MACMU	K.DDNPNLPPLVRPEVDVMCTAFHDNEATFL.K
sp|Q28522|ALBU_MACMU	K.DDNPNLPPLVRPEVDVMCTAFHDNEATFLK.K
sp|Q28522|ALBU_MACMU	K.DDNPNLPPLVRPEVDVMCTAFHDNEATFLKK.Y
sp|Q28522|ALBU_MACMU	K.DDNPNLPPLVRPEVDVMCTAFHDNEATFLKKY.L
sp|Q28522|ALBU_MACMU	K.DLGEEHF.K
sp|Q28522|ALBU_MACMU	K.DLGEEHFK.G
sp|Q28522|ALBU_MACMU	K.DVCKNYAEAK.D
sp|Q28522|ALBU_MACMU	K.DVCKNYAEAKDVFLGM*FLYEYAR.R
sp|Q28522|ALBU_MACMU	K.DVCKNYAEAKDVFLGMFLYEYAR.R
sp|Q28522|ALBU_MACMU	K.DVFLGM*F.L
sp|Q28522|ALBU_MACMU	K.DVFLGM*FL.Y
sp|Q28522|ALBU_MACMU	K.DVFLGM*FLY.E
sp|Q28522|ALBU_MACMU	K.DVFLGM*FLYE.Y
sp|Q28522|ALBU_MACMU	K.DVFLGM*FLYEY.A
sp|Q28522|ALBU_MACMU	K.DVFLGM*FLYEYA.R
sp|Q28522|ALBU_MACMU	K.DVFLGM*FLYEYAR.R
sp|Q28522|ALBU_MACMU	K.DVFLGM*FLYEYARR.H
sp|Q28522|ALBU_MACMU	K.DVFLGM*FLYEYARRH.P
sp|Q28522|ALBU_MACMU	K.DVFLGM*FLYEYARRHPDYSV.M
sp|Q28522|ALBU_MACMU	K.DVFLGMF.L
sp|Q28522|ALBU_MACMU	K.DVFLGMFL.Y
sp|Q28522|ALBU_MACMU	K.DVFLGMFLY.E
sp|Q28522|ALBU_MACMU	K.DVFLGMFLYE.Y
sp|Q28522|ALBU_MACMU	K.DVFLGMFLYEY.A
sp|Q28522|ALBU_MACMU	K.DVFLGMFLYEYA.R
sp|Q28522|ALBU_MACMU	K.DVFLGMFLYEYAR.R
sp|Q28522|ALBU_MACMU	K.DVFLGMFLYEYARR.H
sp|Q28522|ALBU_MACMU	K.DVFLGMFLYEYARRHPDYSVM*LLLRLAKAYEATLEKCCAAA.D
sp|Q28522|ALBU_MACMU	K.DVFLGMFLYEYARRHPDYSVMLLLR.L
sp|Q28522|ALBU_MACMU	K.EACFAEEGPK.F
sp|Q28522|ALBU_MACMU	K.EACFAEEGPKFVAASQAALA.-
sp|Q28522|ALBU_MACMU	K.ECCDKPLLEK.S
sp|Q28522|ALBU_MACMU	K.EQLKGVM*DNFAAFVEK.C
sp|Q28522|ALBU_MACMU	K.EQLKGVMDNFAAFVEK.C
sp|Q28522|ALBU_MACMU	K.FPKAEFAEVSK.L
sp|Q28522|ALBU_MACMU	K.FPKAEFAEVSKLVTDLT.K
sp|Q28522|ALBU_MACMU	K.FPKAEFAEVSKLVTDLTK.V
sp|Q28522|ALBU_MACMU	K.FQNALLV.R
sp|Q28522|ALBU_MACMU	K.FQNALLVR.Y
sp|Q28522|ALBU_MACMU	K.FQNALLVRY.T
sp|Q28522|ALBU_MACMU	K.FVAASQA.A
sp|Q28522|ALBU_MACMU	K.FVAASQAA.L
sp|Q28522|ALBU_MACMU	K.FVAASQAAL.A
sp|Q28522|ALBU_MACMU	K.FVAASQAALA.-
sp|Q28522|ALBU_MACMU	K.GLVLVAFS.Q
sp|Q28522|ALBU_MACMU	K.GLVLVAFSQ.Y
sp|Q28522|ALBU_MACMU	K.GLVLVAFSQY.L
sp|Q28522|ALBU_MACMU	K.GLVLVAFSQYL.Q
sp|Q28522|ALBU_MACMU	K.GLVLVAFSQYLQ.Q
sp|Q28522|ALBU_MACMU	K.GLVLVAFSQYLQQ.C
sp|Q28522|ALBU_MACMU	K.GLVLVAFSQYLQQC.P
sp|Q28522|ALBU_MACMU	K.GLVLVAFSQYLQQCP.F
sp|Q28522|ALBU_MACMU	K.GLVLVAFSQYLQQCPF.E
sp|Q28522|ALBU_MACMU	K.GLVLVAFSQYLQQCPFE.E
sp|Q28522|ALBU_MACMU	K.GLVLVAFSQYLQQCPFEE.H
sp|Q28522|ALBU_MACMU	K.GLVLVAFSQYLQQCPFEEH.V
sp|Q28522|ALBU_MACMU	K.GLVLVAFSQYLQQCPFEEHV.K
sp|Q28522|ALBU_MACMU	K.GLVLVAFSQYLQQCPFEEHVK.L
sp|Q28522|ALBU_MACMU	K.GLVLVAFSQYLQQCPFEEHVKL.V
sp|Q28522|ALBU_MACMU	K.GLVLVAFSQYLQQCPFEEHVKLVNEVT.E
sp|Q28522|ALBU_MACMU	K.GLVLVAFSQYLQQCPFEEHVKLVNEVTEFA.K
sp|Q28522|ALBU_MACMU	K.GLVLVAFSQYLQQCPFEEHVKLVNEVTEFAK.T
sp|Q28522|ALBU_MACMU	K.GLVLVAFSQYLQQCPFEEHVKLVNEVTEFAKTCVADESAEN.C
sp|Q28522|ALBU_MACMU	K.GVM*DNFA.A
sp|Q28522|ALBU_MACMU	K.GVM*DNFAA.F
sp|Q28522|ALBU_MACMU	K.GVM*DNFAAF.V
sp|Q28522|ALBU_MACMU	K.GVM*DNFAAFV.E
sp|Q28522|ALBU_MACMU	K.GVM*DNFAAFVEK.C
sp|Q28522|ALBU_MACMU	K.GVM*DNFAAFVEKC.C
sp|Q28522|ALBU_MACMU	K.GVM*DNFAAFVEKCCK.A
sp|Q28522|ALBU_MACMU	K.GVMDNFA.A
sp|Q28522|ALBU_MACMU	K.GVMDNFAA.F
sp|Q28522|ALBU_MACMU	K.GVMDNFAAF.V
sp|Q28522|ALBU_MACMU	K.GVMDNFAAFV.E
sp|Q28522|ALBU_MACMU	K.GVMDNFAAFVE.K
sp|Q28522|ALBU_MACMU	K.GVMDNFAAFVEK.C
sp|Q28522|ALBU_MACMU	K.GVMDNFAAFVEKC.C
sp|Q28522|ALBU_MACMU	K.GVMDNFAAFVEKCCK.A
sp|Q28522|ALBU_MACMU	K.GVMDNFAAFVEKCCKAD.D
sp|Q28522|ALBU_MACMU	K.GVMDNFAAFVEKCCKADDKEACF.A
sp|Q28522|ALBU_MACMU	K.GVMDNFAAFVEKCCKADDKEACFAEEGPK.F
sp|Q28522|ALBU_MACMU	K.KQTALVEL.L
sp|Q28522|ALBU_MACMU	K.KQTALVELV.K
sp|Q28522|ALBU_MACMU	K.KQTALVELVK.H
sp|Q28522|ALBU_MACMU	K.KVPQVSTP.T
sp|Q28522|ALBU_MACMU	K.KVPQVSTPT.L
sp|Q28522|ALBU_MACMU	K.KVPQVSTPTL.V
sp|Q28522|ALBU_MACMU	K.KVPQVSTPTLV.E
sp|Q28522|ALBU_MACMU	K.KVPQVSTPTLVE.V
sp|Q28522|ALBU_MACMU	K.KVPQVSTPTLVEV.S
sp|Q28522|ALBU_MACMU	K.KVPQVSTPTLVEVS.R
sp|Q28522|ALBU_MACMU	K.KVPQVSTPTLVEVSR.N
sp|Q28522|ALBU_MACMU	K.KVPQVSTPTLVEVSRNL.G
sp|Q28522|ALBU_MACMU	K.KVPQVSTPTLVEVSRNLGK.V
sp|Q28522|ALBU_MACMU	K.KVPQVSTPTLVEVSRNLGKVG.A
sp|Q28522|ALBU_MACMU	K.KYLYEVAR.R
sp|Q28522|ALBU_MACMU	K.KYLYEVARR.H
sp|Q28522|ALBU_MACMU	K.LCTVATL.R
sp|Q28522|ALBU_MACMU	K.LCTVATLR.E
sp|Q28522|ALBU_MACMU	K.LCTVATLRETYGE.M
sp|Q28522|ALBU_MACMU	K.LCTVATLRETYGEM*ADCCAK.Q
sp|Q28522|ALBU_MACMU	K.LCTVATLRETYGEMADCCAK.Q
sp|Q28522|ALBU_MACMU	K.LDELRDEGK.A
sp|Q28522|ALBU_MACMU	K.LDELRDEGKASSAK.Q
sp|Q28522|ALBU_MACMU	K.LKECCDK.P
sp|Q28522|ALBU_MACMU	K.LKECCDKPL.L
sp|Q28522|ALBU_MACMU	K.LKECCDKPLL.E
sp|Q28522|ALBU_MACMU	K.LKECCDKPLLE.K
sp|Q28522|ALBU_MACMU	K.LKECCDKPLLEK.S
sp|Q28522|ALBU_MACMU	K.LVNEVTE.F
sp|Q28522|ALBU_MACMU	K.LVNEVTEF.A
sp|Q28522|ALBU_MACMU	K.LVNEVTEFA.K
sp|Q28522|ALBU_MACMU	K.LVNEVTEFAK.T
sp|Q28522|ALBU_MACMU	K.LVNEVTEFAKT.C
sp|Q28522|ALBU_MACMU	K.LVNEVTEFAKTCVADES.A
sp|Q28522|ALBU_MACMU	K.LVNEVTEFAKTCVADESA.E
sp|Q28522|ALBU_MACMU	K.LVNEVTEFAKTCVADESAENC.D
sp|Q28522|ALBU_MACMU	K.LVNEVTEFAKTCVADESAENCDK.S
sp|Q28522|ALBU_MACMU	K.LVTDLTKVHTECCHGDLLE.C
sp|Q28522|ALBU_MACMU	K.LVTDLTKVHTECCHGDLLECADDR.A
sp|Q28522|ALBU_MACMU	K.LVTDLTKVHTECCHGDLLECADDRADLAK.Y
sp|Q28522|ALBU_MACMU	K.NYAEAKDVF.L
sp|Q28522|ALBU_MACMU	K.NYAEAKDVFLGM*FLYEYAR.R
sp|Q28522|ALBU_MACMU	K.NYAEAKDVFLGMFLYEYAR.R
sp|Q28522|ALBU_MACMU	K.QEPERNECFL.Q
sp|Q28522|ALBU_MACMU	K.QEPERNECFLQ.H
sp|Q28522|ALBU_MACMU	K.QEPERNECFLQH.K
sp|Q28522|ALBU_MACMU	K.QEPERNECFLQHK.D
sp|Q28522|ALBU_MACMU	K.QEPERNECFLQHKD.D
sp|Q28522|ALBU_MACMU	K.QEPERNECFLQHKDD.N
sp|Q28522|ALBU_MACMU	K.QEPERNECFLQHKDDN.P
sp|Q28522|ALBU_MACMU	K.QEPERNECFLQHKDDNPN.L
sp|Q28522|ALBU_MACMU	K.QEPERNECFLQHKDDNPNL.P
sp|Q28522|ALBU_MACMU	K.QEPERNECFLQHKDDNPNLPP.L
sp|Q28522|ALBU_MACMU	K.QEPERNECFLQHKDDNPNLPPL.V
sp|Q28522|ALBU_MACMU	K.QEPERNECFLQHKDDNPNLPPLV.R
sp|Q28522|ALBU_MACMU	K.QEPERNECFLQHKDDNPNLPPLVRPEVDVM*.C
sp|Q28522|ALBU_MACMU	K.QEPERNECFLQHKDDNPNLPPLVRPEVDVM*CTAFHDNEATFLK.K
sp|Q28522|ALBU_MACMU	K.QEPERNECFLQHKDDNPNLPPLVRPEVDVM*CTAFHDNEATFLKK.Y
sp|Q28522|ALBU_MACMU	K.QEPERNECFLQHKDDNPNLPPLVRPEVDVM.C
sp|Q28522|ALBU_MACMU	K.QEPERNECFLQHKDDNPNLPPLVRPEVDVMCTAFHDNEATFLK.K
sp|Q28522|ALBU_MACMU	K.QEPERNECFLQHKDDNPNLPPLVRPEVDVMCTAFHDNEATFLKK.Y
sp|Q28522|ALBU_MACMU	K.QNCELFE.Q
sp|Q28522|ALBU_MACMU	K.QNCELFEQ.L
sp|Q28522|ALBU_MACMU	K.QNCELFEQL.G
sp|Q28522|ALBU_MACMU	K.QNCELFEQLG.E
sp|Q28522|ALBU_MACMU	K.QNCELFEQLGE.Y
sp|Q28522|ALBU_MACMU	K.QNCELFEQLGEY.K
sp|Q28522|ALBU_MACMU	K.QNCELFEQLGEYK.F
sp|Q28522|ALBU_MACMU	K.QNCELFEQLGEYKF.Q
sp|Q28522|ALBU_MACMU	K.QNCELFEQLGEYKFQ.N
sp|Q28522|ALBU_MACMU	K.QNCELFEQLGEYKFQN.A
sp|Q28522|ALBU_MACMU	K.QNCELFEQLGEYKFQNA.C
sp|Q28522|ALBU_MACMU	K.QNCELFEQLGEYKFQNAL.L
sp|Q28522|ALBU_MACMU	K.QNCELFEQLGEYKFQNALL.V
sp|Q28522|ALBU_MACMU	K.QNCELFEQLGEYKFQNALLV.R
sp|Q28522|ALBU_MACMU	K.QNCELFEQLGEYKFQNALLVR.Y
sp|Q28522|ALBU_MACMU	K.QNCELFEQLGEYKFQNALLVRY.T
sp|Q28522|ALBU_MACMU	K.QTALVELV.K
sp|Q28522|ALBU_MACMU	K.QTALVELVK.H
sp|Q28522|ALBU_MACMU	K.QTALVELVKHKPKATK.E
sp|Q28522|ALBU_MACMU	K.RM*PCAEDYLSVVL.N
sp|Q28522|ALBU_MACMU	K.RM*PCAEDYLSVVLN.Q
sp|Q28522|ALBU_MACMU	K.RM*PCAEDYLSVVLNR.L
sp|Q28522|ALBU_MACMU	K.RMPCAED.Y
sp|Q28522|ALBU_MACMU	K.RMPCAEDYL.S
sp|Q28522|ALBU_MACMU	K.RMPCAEDYLS.V
sp|Q28522|ALBU_MACMU	K.RMPCAEDYLSVV.L
sp|Q28522|ALBU_MACMU	K.RMPCAEDYLSVVL.N
sp|Q28522|ALBU_MACMU	K.RMPCAEDYLSVVLN.Q
sp|Q28522|ALBU_MACMU	K.RMPCAEDYLSVVLNR.L
sp|Q28522|ALBU_MACMU	K.RMPCAEDYLSVVLNRL.C
sp|Q28522|ALBU_MACMU	K.RMPCAEDYLSVVLNRLC.V
sp|Q28522|ALBU_MACMU	K.RMPCAEDYLSVVLNRLCV.L
sp|Q28522|ALBU_MACMU	K.RMPCAEDYLSVVLNRLCVLH.E
sp|Q28522|ALBU_MACMU	K.RMPCAEDYLSVVLNRLCVLHEK.T
sp|Q28522|ALBU_MACMU	K.SHCIAEV.E
sp|Q28522|ALBU_MACMU	K.SHCIAEVE.K
sp|Q28522|ALBU_MACMU	K.SHCIAEVEN.D
sp|Q28522|ALBU_MACMU	K.SHCIAEVEND.E
sp|Q28522|ALBU_MACMU	K.SHCIAEVENDE.M
sp|Q28522|ALBU_MACMU	K.SHCIAEVENDEM*.P
sp|Q28522|ALBU_MACMU	K.SHCIAEVENDEM*P.A
sp|Q28522|ALBU_MACMU	K.SHCIAEVENDEM*PA.D
sp|Q28522|ALBU_MACMU	K.SHCIAEVENDEM*PAD.L
sp|Q28522|ALBU_MACMU	K.SHCIAEVENDEM*PADL.P
sp|Q28522|ALBU_MACMU	K.SHCIAEVENDEM*PADLP.S
sp|Q28522|ALBU_MACMU	K.SHCIAEVENDEM*PADLPS.L
sp|Q28522|ALBU_MACMU	K.SHCIAEVENDEM*PADLPSL.A
sp|Q28522|ALBU_MACMU	K.SHCIAEVENDEM*PADLPSLA.A
sp|Q28522|ALBU_MACMU	K.SHCIAEVENDEM*PADLPSLAA.D
sp|Q28522|ALBU_MACMU	K.SHCIAEVENDEM*PADLPSLAAD.F
sp|Q28522|ALBU_MACMU	K.SHCIAEVENDEM*PADLPSLAADFVESK.D
sp|Q28522|ALBU_MACMU	K.SHCIAEVENDEM.P
sp|Q28522|ALBU_MACMU	K.SHCIAEVENDEMP.A
sp|Q28522|ALBU_MACMU	K.SHCIAEVENDEMPA.D
sp|Q28522|ALBU_MACMU	K.SHCIAEVENDEMPAD.L
sp|Q28522|ALBU_MACMU	K.SHCIAEVENDEMPADL.P
sp|Q28522|ALBU_MACMU	K.SHCIAEVENDEMPADLP.S
sp|Q28522|ALBU_MACMU	K.SHCIAEVENDEMPADLPS.L
sp|Q28522|ALBU_MACMU	K.SHCIAEVENDEMPADLPSL.A
sp|Q28522|ALBU_MACMU	K.SHCIAEVENDEMPADLPSLA.A
sp|Q28522|ALBU_MACMU	K.SHCIAEVENDEMPADLPSLAA.D
sp|Q28522|ALBU_MACMU	K.SHCIAEVENDEMPADLPSLAAD.F
sp|Q28522|ALBU_MACMU	K.SHCLAEVENDEM*PADLPSLAADY.V
sp|Q28522|ALBU_MACMU	K.SHCLAEVENDEM*PADLPSLAADYV.E
sp|Q28522|ALBU_MACMU	K.SHCLAEVENDEM*PADLPSLAADYVESK.D
sp|Q28522|ALBU_MACMU	K.SHCLAEVENDEM*PADLPSLAADYVESKD.V
sp|Q28522|ALBU_MACMU	K.SHCLAEVENDEM*PADLPSLAADYVESKDV.C
sp|Q28522|ALBU_MACMU	K.SHCLAEVENDEM*PADLPSLAADYVESKDVCK.N
sp|Q28522|ALBU_MACMU	K.SHCLAEVENDEM*PADLPSLAADYVESKDVCKNYAE.A
sp|Q28522|ALBU_MACMU	K.SHCLAEVENDEM*PADLPSLAADYVESKDVCKNYAEA.K
sp|Q28522|ALBU_MACMU	K.SHCLAEVENDEMPADLPSLAADY.V
sp|Q28522|ALBU_MACMU	K.SHCLAEVENDEMPADLPSLAADYV.E
sp|Q28522|ALBU_MACMU	K.SHCLAEVENDEMPADLPSLAADYVESK.D
sp|Q28522|ALBU_MACMU	K.SHCLAEVENDEMPADLPSLAADYVESKD.V
sp|Q28522|ALBU_MACMU	K.SHCLAEVENDEMPADLPSLAADYVESKDV.C
sp|Q28522|ALBU_MACMU	K.SHCLAEVENDEMPADLPSLAADYVESKDVCK.N
sp|Q28522|ALBU_MACMU	K.SHCLAEVENDEMPADLPSLAADYVESKDVCKN.Y
sp|Q28522|ALBU_MACMU	K.SHCLAEVENDEMPADLPSLAADYVESKDVCKNYAEAKDVFLGM.F
sp|Q28522|ALBU_MACMU	K.SLHTLFGDK.L
sp|Q28522|ALBU_MACMU	K.SLHTLFGDKL.C
sp|Q28522|ALBU_MACMU	K.SLHTLFGDKLC.T
sp|Q28522|ALBU_MACMU	K.SLHTLFGDKLCT.V
sp|Q28522|ALBU_MACMU	K.SLHTLFGDKLCTV.A
sp|Q28522|ALBU_MACMU	K.SLHTLFGDKLCTVA.T
sp|Q28522|ALBU_MACMU	K.SLHTLFGDKLCTVAT.L
sp|Q28522|ALBU_MACMU	K.SLHTLFGDKLCTVATL.R
sp|Q28522|ALBU_MACMU	K.SLHTLFGDKLCTVATLR.E
sp|Q28522|ALBU_MACMU	K.SLHTLFGDKLCTVATLRETYG.E
sp|Q28522|ALBU_MACMU	K.SLHTLFGDKLCTVATLRETYGEM*ADCCAK.Q
sp|Q28522|ALBU_MACMU	K.SLHTLFGDKLCTVATLRETYGEMADCCAK.Q
sp|Q28522|ALBU_MACMU	K.TCVADES.A
sp|Q28522|ALBU_MACMU	K.TCVADESA.E
sp|Q28522|ALBU_MACMU	K.TCVADESAE.N
sp|Q28522|ALBU_MACMU	K.TCVADESAEN.C
sp|Q28522|ALBU_MACMU	K.TCVADESAENC.D
sp|Q28522|ALBU_MACMU	K.TCVADESAENCD.K
sp|Q28522|ALBU_MACMU	K.TCVADESAENCDK.S
sp|Q28522|ALBU_MACMU	K.TCVADESAENCDKS.L
sp|Q28522|ALBU_MACMU	K.TCVADESAENCDKSL.H
sp|Q28522|ALBU_MACMU	K.TCVADESAENCDKSLH.T
sp|Q28522|ALBU_MACMU	K.TCVADESAENCDKSLHTLF.G
sp|Q28522|ALBU_MACMU	K.TCVADESAENCDKSLHTLFGD.K
sp|Q28522|ALBU_MACMU	K.TCVADESAENCDKSLHTLFGDK.L
sp|Q28522|ALBU_MACMU	K.TCVADESAENCDKSLHTLFGDKL.C
sp|Q28522|ALBU_MACMU	K.TCVADESAENCDKSLHTLFGDKLCTVA.T
sp|Q28522|ALBU_MACMU	K.TCVADESAENCDKSLHTLFGDKLCTVATL.R
sp|Q28522|ALBU_MACMU	K.TCVADESAENCDKSLHTLFGDKLCTVATLR.E
sp|Q28522|ALBU_MACMU	K.TCVADESAENCDKSLHTLFGDKLCTVATLRE.T
sp|Q28522|ALBU_MACMU	K.TCVADESAENCDKSLHTLFGDKLCTVATLRET.Y
sp|Q28522|ALBU_MACMU	K.TPVSEKVTK.C
sp|Q28522|ALBU_MACMU	K.TPVSEKVTKCCTESLVNR.R
sp|Q28522|ALBU_MACMU	K.VFDEFQP.L
sp|Q28522|ALBU_MACMU	K.VFDEFQPL.V
sp|Q28522|ALBU_MACMU	K.VFDEFQPLV.E
sp|Q28522|ALBU_MACMU	K.VFDEFQPLVE.E
sp|Q28522|ALBU_MACMU	K.VFDEFQPLVEE.P
sp|Q28522|ALBU_MACMU	K.VFDEFQPLVEEP.Q
sp|Q28522|ALBU_MACMU	K.VFDEFQPLVEEPQ.N
sp|Q28522|ALBU_MACMU	K.VFDEFQPLVEEPQN.L
sp|Q28522|ALBU_MACMU	K.VFDEFQPLVEEPQNL.V
sp|Q28522|ALBU_MACMU	K.VFDEFQPLVEEPQNLV.K
sp|Q28522|ALBU_MACMU	K.VFDEFQPLVEEPQNLVK.Q
sp|Q28522|ALBU_MACMU	K.VFDEFQPLVEEPQNLVKQN.C
sp|Q28522|ALBU_MACMU	K.VFDEFQPLVEEPQNLVKQNCE.L
sp|Q28522|ALBU_MACMU	K.VFDEFQPLVEEPQNLVKQNCEL.F
sp|Q28522|ALBU_MACMU	K.VFDEFQPLVEEPQNLVKQNCELF.E
sp|Q28522|ALBU_MACMU	K.VFDEFQPLVEEPQNLVKQNCELFEQ.L
sp|Q28522|ALBU_MACMU	K.VFDEFQPLVEEPQNLVKQNCELFEQLGE.Y
sp|Q28522|ALBU_MACMU	K.VFDEFQPLVEEPQNLVKQNCELFEQLGEYK.F
sp|Q28522|ALBU_MACMU	K.VFDEFQPLVEEPQNLVKQNCELFEQLGEYKF.Q
sp|Q28522|ALBU_MACMU	K.VFDEFQPLVEEPQNLVKQNCELFEQLGEYKFQNALL.V
sp|Q28522|ALBU_MACMU	K.VFDEFQPLVEEPQNLVKQNCELFEQLGEYKFQNALLVRYTKK.V
sp|Q28522|ALBU_MACMU	K.VHTECC.H
sp|Q28522|ALBU_MACMU	K.VHTECCH.G
sp|Q28522|ALBU_MACMU	K.VHTECCHG.D
sp|Q28522|ALBU_MACMU	K.VHTECCHGD.L
sp|Q28522|ALBU_MACMU	K.VHTECCHGDL.L
sp|Q28522|ALBU_MACMU	K.VHTECCHGDLL.E
sp|Q28522|ALBU_MACMU	K.VHTECCHGDLLE.C
sp|Q28522|ALBU_MACMU	K.VHTECCHGDLLEC.A
sp|Q28522|ALBU_MACMU	K.VHTECCHGDLLECA.D
sp|Q28522|ALBU_MACMU	K.VHTECCHGDLLECAD.D
sp|Q28522|ALBU_MACMU	K.VHTECCHGDLLECADD.R
sp|Q28522|ALBU_MACMU	K.VHTECCHGDLLECADDR.A
sp|Q28522|ALBU_MACMU	K.VHTECCHGDLLECADDRA.D
sp|Q28522|ALBU_MACMU	K.VHTECCHGDLLECADDRAD.L
sp|Q28522|ALBU_MACMU	K.VHTECCHGDLLECADDRADL.A
sp|Q28522|ALBU_MACMU	K.VHTECCHGDLLECADDRADLA.K
sp|Q28522|ALBU_MACMU	K.VHTECCHGDLLECADDRADLAK.Y
sp|Q28522|ALBU_MACMU	K.VHTECCHGDLLECADDRADLAKY.I
sp|Q28522|ALBU_MACMU	K.VHTECCHGDLLECADDRADLAKYM*CE.N
sp|Q28522|ALBU_MACMU	K.VHTECCHGDLLECADDRADLAKYM*CENQ.D
sp|Q28522|ALBU_MACMU	K.VHTECCHGDLLECADDRADLAKYMCENQDSISSKLKECCDK.P
sp|Q28522|ALBU_MACMU	K.VPQVSTP.T
sp|Q28522|ALBU_MACMU	K.VPQVSTPT.L
sp|Q28522|ALBU_MACMU	K.VPQVSTPTL.V
sp|Q28522|ALBU_MACMU	K.VPQVSTPTLVEVSR.N
sp|Q28522|ALBU_MACMU	K.VPQVSTPTLVEVSRNLGK.V
sp|Q28522|ALBU_MACMU	K.VPQVSTPTLVEVSRNLGKVGA.K
sp|Q28522|ALBU_MACMU	K.VTKCCTESLVNR.R
sp|Q28522|ALBU_MACMU	K.YLYEVAR.R
sp|Q28522|ALBU_MACMU	K.YLYEVARR.H
sp|Q28522|ALBU_MACMU	K.YM*CENQ.D
sp|Q28522|ALBU_MACMU	K.YM*CENQD.S
sp|Q28522|ALBU_MACMU	K.YM*CENQDS.I
sp|Q28522|ALBU_MACMU	K.YM*CENQDSIS.S
sp|Q28522|ALBU_MACMU	K.YM*CENQDSISS.K
sp|Q28522|ALBU_MACMU	K.YM*CENQDSISSK.L
sp|Q28522|ALBU_MACMU	K.YM*CENQDSISSKL.K
sp|Q28522|ALBU_MACMU	K.YM*CENQDSISSKLK.E
sp|Q28522|ALBU_MACMU	K.YM*CENQDSISSKLKECCDKPLLEKSHCLAE.V
sp|Q28522|ALBU_MACMU	K.YMCENQ.D
sp|Q28522|ALBU_MACMU	K.YMCENQD.S
sp|Q28522|ALBU_MACMU	K.YMCENQDS.I
sp|Q28522|ALBU_MACMU	K.YMCENQDSI.S
sp|Q28522|ALBU_MACMU	K.YMCENQDSIS.S
sp|Q28522|ALBU_MACMU	K.YMCENQDSISS.K
sp|Q28522|ALBU_MACMU	K.YMCENQDSISSK.L
sp|Q28522|ALBU_MACMU	K.YMCENQDSISSKL.K
sp|Q28522|ALBU_MACMU	K.YMCENQDSISSKLK.E
sp|Q28522|ALBU_MACMU	K.YMCENQDSISSKLKE.C
sp|Q28522|ALBU_MACMU	K.YMCENQDSISSKLKECCDKPLLEKSHCLAEVENDEM*PADLPSLA.A
sp|Q28522|ALBU_MACMU	L.AADYVESK.D
sp|Q28522|ALBU_MACMU	L.CVLHEKTPVSEK.V
sp|Q28522|ALBU_MACMU	L.ECADDRADLAK.Y
sp|Q28522|ALBU_MACMU	L.ELDEAYVPK.A
sp|Q28522|ALBU_MACMU	L.FEQLGEYK.F
sp|Q28522|ALBU_MACMU	L.FGDKLCTVATLR.E
sp|Q28522|ALBU_MACMU	L.HTLFGDKLCTVATLR.E
sp|Q28522|ALBU_MACMU	L.KGVMDNFAAFVEK.C
sp|Q28522|ALBU_MACMU	L.LECADDRADLAK.Y
sp|Q28522|ALBU_MACMU	L.PSLAADYVESK.D
sp|Q28522|ALBU_MACMU	L.QQCPFEEHVK.L
sp|Q28522|ALBU_MACMU	L.RETYGEM*ADCCAK.Q
sp|Q28522|ALBU_MACMU	L.RETYGEMADCCAK.Q
sp|Q28522|ALBU_MACMU	L.VAFSQYLQQCPFEEHVK.L
sp|Q28522|ALBU_MACMU	L.VEEPQNLVK.Q
sp|Q28522|ALBU_MACMU	L.VLVAFSQYLQQCPFEEHVK.L
sp|Q28522|ALBU_MACMU	L.VNEVTEFAK.T
sp|Q28522|ALBU_MACMU	M.CTAFHDNEATFLK.K
sp|Q28522|ALBU_MACMU	M.CTAFHDNEATFLKK.Y
sp|Q28522|ALBU_MACMU	M.DNFAAFVEK.C
sp|Q28522|ALBU_MACMU	M.PADLPSLAADYVESK.D
sp|Q28522|ALBU_MACMU	M.PCAEDYLSVVLNR.L
sp|Q28522|ALBU_MACMU	N.AETFTFHADM*CTLSEKEK.Q
sp|Q28522|ALBU_MACMU	N.CELFEQLGEYK.F
sp|Q28522|ALBU_MACMU	N.CELFEQLGEYKFQNALLVR.Y
sp|Q28522|ALBU_MACMU	N.DEM*PADLPSLAADYVESK.D
sp|Q28522|ALBU_MACMU	N.DEMPADLPSLAADYVESK.D
sp|Q28522|ALBU_MACMU	N.ECFLQHK.D
sp|Q28522|ALBU_MACMU	N.LPPLVRPEVDVMCTAFHDNEATFLK.K
sp|Q28522|ALBU_MACMU	N.LPPLVRPEVDVMCTAFHDNEATFLKK.Y
sp|Q28522|ALBU_MACMU	N.PNLPPLVRPEVDVMCTAFHDNEATFLK.K
sp|Q28522|ALBU_MACMU	N.PNLPPLVRPEVDVMCTAFHDNEATFLKK.Y
sp|Q28522|ALBU_MACMU	P.ADLPSLAADYVESK.D
sp|Q28522|ALBU_MACMU	P.CAEDYLSVVLNR.L
sp|Q28522|ALBU_MACMU	P.CFSALELDEAYVPK.A
sp|Q28522|ALBU_MACMU	P.DYSVMLLLR.L
sp|Q28522|ALBU_MACMU	P.KAEFAEVSK.L
sp|Q28522|ALBU_MACMU	P.KAFNAETFTFHADM*CTLSEKEK.Q
sp|Q28522|ALBU_MACMU	P.KAFNAETFTFHADMCTLSEKEK.Q
sp|Q28522|ALBU_MACMU	P.LVEEPQNLVK.Q
sp|Q28522|ALBU_MACMU	P.QVSTPTLVEVSR.N
sp|Q28522|ALBU_MACMU	P.SLAADYVESK.D
sp|Q28522|ALBU_MACMU	P.YFYAPELLFFAAR.Y
sp|Q28522|ALBU_MACMU	Q.CPFEEHVK.L
sp|Q28522|ALBU_MACMU	Q.EPERNECFLQHK.D
sp|Q28522|ALBU_MACMU	Q.NCELFEQLGEYK.F
sp|Q28522|ALBU_MACMU	Q.NCELFEQLGEYKFQNALLVR.Y
sp|Q28522|ALBU_MACMU	Q.QCPFEEHVK.L
sp|Q28522|ALBU_MACMU	Q.VSTPTLVEVSR.N
sp|Q28522|ALBU_MACMU	Q.YLQQCPFEEHVK.L
sp|Q28522|ALBU_MACMU	R.ADLAKYM*CENQDSISSK.L
sp|Q28522|ALBU_MACMU	R.ADLAKYMCENQDSISSK.L
sp|Q28522|ALBU_MACMU	R.AFKAWAVAR.L
sp|Q28522|ALBU_MACMU	R.ATTVLTQHWPIIMEK.W
sp|Q28522|ALBU_MACMU	R.DTHKSEVA.H
sp|Q28522|ALBU_MACMU	R.DTHKSEVAHR.F
sp|Q28522|ALBU_MACMU	R.ETYGEM*A.D
sp|Q28522|ALBU_MACMU	R.ETYGEM*AD.C
sp|Q28522|ALBU_MACMU	R.ETYGEM*ADC.C
sp|Q28522|ALBU_MACMU	R.ETYGEM*ADCC.A
sp|Q28522|ALBU_MACMU	R.ETYGEM*ADCCA.K
sp|Q28522|ALBU_MACMU	R.ETYGEM*ADCCAK.Q
sp|Q28522|ALBU_MACMU	R.ETYGEM*ADCCAKQE.P
sp|Q28522|ALBU_MACMU	R.ETYGEM*ADCCAKQEP.E
sp|Q28522|ALBU_MACMU	R.ETYGEM*ADCCAKQEPER.N
sp|Q28522|ALBU_MACMU	R.ETYGEM*ADCCAKQEPERNECFL.Q
sp|Q28522|ALBU_MACMU	R.ETYGEM*ADCCAKQEPERNECFLQHK.D
sp|Q28522|ALBU_MACMU	R.ETYGEMA.D
sp|Q28522|ALBU_MACMU	R.ETYGEMAD.C
sp|Q28522|ALBU_MACMU	R.ETYGEMADC.C
sp|Q28522|ALBU_MACMU	R.ETYGEMADCC.A
sp|Q28522|ALBU_MACMU	R.ETYGEMADCCA.K
sp|Q28522|ALBU_MACMU	R.ETYGEMADCCAK.Q
sp|Q28522|ALBU_MACMU	R.ETYGEMADCCAKQEPER.N
sp|Q28522|ALBU_MACMU	R.ETYGEMADCCAKQEPERNECFLQHK.D
sp|Q28522|ALBU_MACMU	R.ETYGEMADCCAKQEPERNECFLQHKDDNP.N
sp|Q28522|ALBU_MACMU	R.FKDLGEEH.F
sp|Q28522|ALBU_MACMU	R.FKDLGEEHF.K
sp|Q28522|ALBU_MACMU	R.FKDLGEEHFK.G
sp|Q28522|ALBU_MACMU	R.FKDLGEEHFKG.L
sp|Q28522|ALBU_MACMU	R.HPDYSVM*.L
sp|Q28522|ALBU_MACMU	R.HPDYSVM*LLLR.L
sp|Q28522|ALBU_MACMU	R.HPDYSVM.L
sp|Q28522|ALBU_MACMU	R.HPDYSVML.L
sp|Q28522|ALBU_MACMU	R.HPDYSVMLL.L
sp|Q28522|ALBU_MACMU	R.HPDYSVMLLL.R
sp|Q28522|ALBU_MACMU	R.HPDYSVMLLLR.L
sp|Q28522|ALBU_MACMU	R.HPYFYAP.E
sp|Q28522|ALBU_MACMU	R.HPYFYAPELL.F
sp|Q28522|ALBU_MACMU	R.HPYFYAPELLF.F
sp|Q28522|ALBU_MACMU	R.HPYFYAPELLFF.A
sp|Q28522|ALBU_MACMU	R.HPYFYAPELLFFA.A
sp|Q28522|ALBU_MACMU	R.HPYFYAPELLFFAA.R
sp|Q28522|ALBU_MACMU	R.HPYFYAPELLFFAAR.Y
sp|Q28522|ALBU_MACMU	R.HPYFYAPELLFFAARYKAAFAECCQAADK.A
sp|Q28522|ALBU_MACMU	R.LAKAYEATLEK.C
sp|Q28522|ALBU_MACMU	R.LCVLHEK.T
sp|Q28522|ALBU_MACMU	R.LCVLHEKTPV.S
sp|Q28522|ALBU_MACMU	R.LCVLHEKTPVS.E
sp|Q28522|ALBU_MACMU	R.LCVLHEKTPVSEK.V
sp|Q28522|ALBU_MACMU	R.LCVLHEKTPVSEKVTK.C
sp|Q28522|ALBU_MACMU	R.LKCASLQK.F
sp|Q28522|ALBU_MACMU	R.LSQKFPK.A
sp|Q28522|ALBU_MACMU	R.LSQKFPKAEFAEVSK.L
sp|Q28522|ALBU_MACMU	R.M*PCAEDYL.S
sp|Q28522|ALBU_MACMU	R.M*PCAEDYLS.V
sp|Q28522|ALBU_MACMU	R.M*PCAEDYLSVVL.N
sp|Q28522|ALBU_MACMU	R.M*PCAEDYLSVVLN.Q
sp|Q28522|ALBU_MACMU	R.M*PCAEDYLSVVLNR.L
sp|Q28522|ALBU_MACMU	R.M*PCAEDYLSVVLNRL.C
sp|Q28522|ALBU_MACMU	R.M*PCAEDYLSVVLNRLCVLHEK.T
sp|Q28522|ALBU_MACMU	R.M*PCAEDYLSVVLNRLCVLHEKTPVSEK.V
sp|Q28522|ALBU_MACMU	R.MPCAEDYL.S
sp|Q28522|ALBU_MACMU	R.MPCAEDYLSVVL.N
sp|Q28522|ALBU_MACMU	R.MPCAEDYLSVVLN.Q
sp|Q28522|ALBU_MACMU	R.MPCAEDYLSVVLNR.L
sp|Q28522|ALBU_MACMU	R.MPCAEDYLSVVLNRL.C
sp|Q28522|ALBU_MACMU	R.MPCAEDYLSVVLNRLCVLHEK.T
sp|Q28522|ALBU_MACMU	R.MPCAEDYLSVVLNRLCVLHEKTPVSEK.V
sp|Q28522|ALBU_MACMU	R.NECFLQHK.D
sp|Q28522|ALBU_MACMU	R.NECFLQHKDDNPNLP.P
sp|Q28522|ALBU_MACMU	R.NECFLQHKDDNPNLPPLV.R
sp|Q28522|ALBU_MACMU	R.NECFLQHKDDNPNLPPLVRPEVDVM*.C
sp|Q28522|ALBU_MACMU	R.NECFLQHKDDNPNLPPLVRPEVDVM*CTAFHDNEATFLK.K
sp|Q28522|ALBU_MACMU	R.NECFLQHKDDNPNLPPLVRPEVDVM.C
sp|Q28522|ALBU_MACMU	R.NECFLQHKDDNPNLPPLVRPEVDVMCTAFHDNEATFLK.K
sp|Q28522|ALBU_MACMU	R.NLGKVGAK.C
sp|Q28522|ALBU_MACMU	R.PCFSALELDEAYVPK.A
sp|Q28522|ALBU_MACMU	R.RHPDYSVM*.L
sp|Q28522|ALBU_MACMU	R.RHPDYSVM*L.L
sp|Q28522|ALBU_MACMU	R.RHPDYSVM*LL.L
sp|Q28522|ALBU_MACMU	R.RHPDYSVM*LLL.R
sp|Q28522|ALBU_MACMU	R.RHPDYSVM*LLLR.L
sp|Q28522|ALBU_MACMU	R.RHPDYSVM.L
sp|Q28522|ALBU_MACMU	R.RHPDYSVML.L
sp|Q28522|ALBU_MACMU	R.RHPDYSVMLL.L
sp|Q28522|ALBU_MACMU	R.RHPDYSVMLLL.R
sp|Q28522|ALBU_MACMU	R.RHPDYSVMLLLR.L
sp|Q28522|ALBU_MACMU	R.RHPYFYAP.E
sp|Q28522|ALBU_MACMU	R.RHPYFYAPELL.F
sp|Q28522|ALBU_MACMU	R.RHPYFYAPELLF.F
sp|Q28522|ALBU_MACMU	R.RHPYFYAPELLFF.A
sp|Q28522|ALBU_MACMU	R.RHPYFYAPELLFFAA.R
sp|Q28522|ALBU_MACMU	R.RHPYFYAPELLFFAAR.Y
sp|Q28522|ALBU_MACMU	R.RPCFSAL.E
sp|Q28522|ALBU_MACMU	R.RPCFSALEL.D
sp|Q28522|ALBU_MACMU	R.RPCFSALELD.E
sp|Q28522|ALBU_MACMU	R.RPCFSALELDE.A
sp|Q28522|ALBU_MACMU	R.RPCFSALELDEA.Y
sp|Q28522|ALBU_MACMU	R.RPCFSALELDEAY.V
sp|Q28522|ALBU_MACMU	R.RPCFSALELDEAYVP.K
sp|Q28522|ALBU_MACMU	R.RPCFSALELDEAYVPK.A
sp|Q28522|ALBU_MACMU	R.RPCFSALELDEAYVPKA.F
sp|Q28522|ALBU_MACMU	R.RPCFSALELDEAYVPKAFN.A
sp|Q28522|ALBU_MACMU	R.RPCFSALELDEAYVPKAFNAETF.T
sp|Q28522|ALBU_MACMU	R.RPCFSALELDEAYVPKAFNAETFT.F
sp|Q28522|ALBU_MACMU	R.RPCFSALELDEAYVPKAFNAETFTFH.A
sp|Q28522|ALBU_MACMU	R.RPCFSALELDEAYVPKAFNAETFTFHADM*CTLSEKEKQ.V
sp|Q28522|ALBU_MACMU	R.RPCFSALELDEAYVPKAFNAETFTFHADMCT.L
sp|Q28522|ALBU_MACMU	R.YKAAFAEC.C
sp|Q28522|ALBU_MACMU	R.YKAAFAECC.Q
sp|Q28522|ALBU_MACMU	R.YKAAFAECCQAA.D
sp|Q28522|ALBU_MACMU	R.YKAAFAECCQAADK.A
sp|Q28522|ALBU_MACMU	R.YKAAFAECCQAADKA.A
sp|Q28522|ALBU_MACMU	R.YKAAFAECCQAADKAA.C
sp|Q28522|ALBU_MACMU	R.YKAAFAECCQAADKAAC.L
sp|Q28522|ALBU_MACMU	R.YKAAFAECCQAADKAACLLPK.L
sp|Q28522|ALBU_MACMU	R.YTKKVPQVSTPTLVEVSR.N
sp|Q28522|ALBU_MACMU	S.ALELDEAYVPK.A
sp|Q28522|ALBU_MACMU	S.HCLAEVENDEM*PADLPSLAADYVESK.D
sp|Q28522|ALBU_MACMU	S.HCLAEVENDEMPADLPSLAADYVESK.D
sp|Q28522|ALBU_MACMU	S.KLVTDLTK.V
sp|Q28522|ALBU_MACMU	S.LAADYVESK.D
sp|Q28522|ALBU_MACMU	S.QYLQQCPFEEHVK.L
sp|Q28522|ALBU_MACMU	T.AFHDNEATFLK.K
sp|Q28522|ALBU_MACMU	T.AFHDNEATFLKK.Y
sp|Q28522|ALBU_MACMU	T.CVADESAENCDK.S
sp|Q28522|ALBU_MACMU	T.FTFHADMCTLSEKEK.Q
sp|Q28522|ALBU_MACMU	T.KCCTESLVNR.R
sp|Q28522|ALBU_MACMU	T.LFGDKLCTVATLR.E
sp|Q28522|ALBU_MACMU	T.LRETYGEMADCCAK.Q
sp|Q28522|ALBU_MACMU	T.YGEM*ADCCAK.Q
sp|Q28522|ALBU_MACMU	T.YGEMADCCAK.Q
sp|Q28522|ALBU_MACMU	V.FDEFQPLVEEPQNLVK.Q
sp|Q28522|ALBU_MACMU	V.HTECCHGDLLECADDRADLAK.Y
sp|Q28522|ALBU_MACMU	V.KLVNEVTEFAK.T
sp|Q28522|ALBU_MACMU	V.NEVTEFAK.T
sp|Q28522|ALBU_MACMU	V.RPEVDVMCTAFHDNEATFLKK.Y
sp|Q28522|ALBU_MACMU	V.STPTLVEVSR.N
sp|Q28522|ALBU_MACMU	Y.AKVFDEFQPLVEEPQNLVK.Q
sp|Q28522|ALBU_MACMU	Y.APELLFFAAR.Y
sp|Q28522|ALBU_MACMU	Y.FYAPELLFFAAR.Y
sp|Q28522|ALBU_MACMU	Y.GEM*ADCCAK.Q
sp|Q28522|ALBU_MACMU	Y.GEMADCCAK.Q
sp|Q28522|ALBU_MACMU	Y.KAAFAECCQAADK.A
sp|Q28522|ALBU_MACMU	Y.LQQCPFEEHVK.L
sp|Q28522|ALBU_MACMU	Y.TKKVPQVSTPTLVEVSR.N
sp|Q28864|TFPI1_MACMU	Q.EKPDFCFLEEDPGICR.G
sp|Q28864|TFPI1_MACMU	R.FYYNSVIGK.C
sp|Q28864|TFPI1_MACMU	R.IIQTALQQEKPDFCFLEEDPGICR.G
sp|Q2Q426|AGRE2_MACMU	K.VQDLDRDFK.T
sp|Q2Q426|AGRE2_MACMU	R.NTEGSYDCVCNPGYELVSGAK.T
sp|Q3S8M4|ELOV4_MACMU	K.WMKDREPFQM*R.L
sp|Q50DM8|GPR56_MACMU	R.DLQLLSQFLK.H
sp|Q53CG4|CX6B1_MACMU	K.GGNVSVCEWYQR.V
sp|Q53CG4|CX6B1_MACMU	K.TAPFDSR.F
sp|Q53CG4|CX6B1_MACMU	R.FPNQNQTR.N
sp|Q53CG4|CX6B1_MACMU	R.VYQSLCPTSWVTDWDEQRAEGTFPGKI.-
sp|Q5J5Z9|DB122_MACMU	K.DQPHLPQR.T
sp|Q5J5Z9|DB122_MACMU	K.VYVFCMSGK.L
sp|Q5NKV6|ICAM1_MACMU	K.CLKDGTFPLPIGQSVTVTR.D
sp|Q5NKV6|ICAM1_MACMU	K.DGTFPLPIGQSVTVTR.D
sp|Q5NKV6|ICAM1_MACMU	K.MYELSNVQEDSQPMCYSNCPDGQSSAK.T
sp|Q5NKV6|ICAM1_MACMU	K.VTAEEEGTQQLLCGVM*LGNQTQETR.Q
sp|Q5NKV6|ICAM1_MACMU	K.VTAEEEGTQQLLCGVMLGNQTQETR.Q
sp|Q5NKV6|ICAM1_MACMU	R.CQVEGGAPR.A
sp|Q5NKV6|ICAM1_MACMU	R.DLEGTYLCQAR.S
sp|Q5NKV6|ICAM1_MACMU	R.EVTVNVLSPR.Y
sp|Q5NKV6|ICAM1_MACMU	R.QSAVGEPAEVTTTVPVGR.D
sp|Q5NKV6|ICAM1_MACMU	R.TELDLRPYVLK.L
sp|Q5TM25|AIF1_MACMU	K.LIGEVSSGSGETFSYPDFLR.M
sp|Q5TM59|GNL1_MACMU	R.EQVLQPVSAEVLELDIR.E
sp|Q6DN04|MIF_MACMU	K.LLCGLLAER.L
sp|Q6DN04|MIF_MACMU	M.PM*FIVNTNVPR.A
sp|Q6DN04|MIF_MACMU	M.PMFIVNTNVPR.A
sp|Q6DN04|MIF_MACMU	R.ASVPDGFLSELTQQLAQATGK.P
sp|Q6V7J5|B2MG_MACMU	E.FTPNEKDEYACR.V
sp|Q6V7J5|B2MG_MACMU	F.TPNEKDEYACR.V
sp|Q6V7J5|B2MG_MACMU	K.DWSFYLLY.Y
sp|Q6V7J5|B2MG_MACMU	K.DWSFYLLYYTEFTPNEKDEYACR.V
sp|Q6V7J5|B2MG_MACMU	K.IQVYSRHPPENGK.P
sp|Q6V7J5|B2MG_MACMU	K.M*GKVEHSDLSFSK.D
sp|Q6V7J5|B2MG_MACMU	K.MGKVEHSDLSFSK.D
sp|Q6V7J5|B2MG_MACMU	K.VEHSDLSFSK.D
sp|Q6V7J5|B2MG_MACMU	K.VEHSDLSFSKDWSFY.L
sp|Q6V7J5|B2MG_MACMU	K.VEHSDLSFSKDWSFYLLYYTEFTPNEKDEYACR.V
sp|Q6V7J5|B2MG_MACMU	L.YYTEFTPNEKDEYACR.V
sp|Q6V7J5|B2MG_MACMU	N.CYVSGFHPSDIEVDLLK.N
sp|Q6V7J5|B2MG_MACMU	N.EKDEYACR.V
sp|Q6V7J5|B2MG_MACMU	N.FLNCYVSGFHPSDIEVDLLK.N
sp|Q6V7J5|B2MG_MACMU	P.NEKDEYACR.V
sp|Q6V7J5|B2MG_MACMU	P.SDIEVDLLK.N
sp|Q6V7J5|B2MG_MACMU	R.HPPENGKP.N
sp|Q6V7J5|B2MG_MACMU	R.HPPENGKPN.F
sp|Q6V7J5|B2MG_MACMU	R.HPPENGKPNFLNCYVSGFHPSDIEVDLLK.N
sp|Q6V7J5|B2MG_MACMU	R.TVKWDR.D
sp|Q6V7J5|B2MG_MACMU	R.TVKWDRDM*.-
sp|Q6V7J5|B2MG_MACMU	R.TVKWDRDM.-
sp|Q6V7J5|B2MG_MACMU	R.VNHVTLSGPR.T
sp|Q6V7J5|B2MG_MACMU	S.GFHPSDIEVDLLK.N
sp|Q6V7J5|B2MG_MACMU	T.EFTPNEKDEYACR.V
sp|Q6V7J5|B2MG_MACMU	Y.LLYYTEFTPNEKDEYACR.V
sp|Q6V7J5|B2MG_MACMU	Y.TEFTPNEKDEYACR.V
sp|Q6V7J5|B2MG_MACMU	Y.VSGFHPSDIEVDLLK.N
sp|Q6V7J5|B2MG_MACMU	Y.YTEFTPNEKDEYACR.V
sp|Q71SP5|CNR1_MACMU	K.LGYFPQKFP.L
sp|Q7YRN1|SFRP4_MACMU	K.WIDITPDMMVQERPLDVDCK.R
sp|Q7YRN1|SFRP4_MACMU	K.WIDITPDMMVQERPLDVDCKR.L
sp|Q7YRN1|SFRP4_MACMU	R.ARDDCEPLM*K.M
sp|Q7YRN1|SFRP4_MACMU	R.ARDDCEPLMK.M
sp|Q7YRN1|SFRP4_MACMU	R.GAPCEAVR.I
sp|Q7YRN1|SFRP4_MACMU	R.GVCISPEAIV.T
sp|Q7YRN1|SFRP4_MACMU	R.GVCISPEAIVTDLPEDVK.W
sp|Q7YRN1|SFRP4_MACMU	R.MMLLENCLVEK.W
sp|Q7YRN1|SFRP4_MACMU	R.SGCNEVTTVVDVK.E
sp|Q7YRN1|SFRP4_MACMU	R.SIQWEER.L
sp|Q861Q8|OPTN_MACMU	R.SSEDPTDDSRLPR.A
sp|Q861Q8|OPTN_MACMU	R.TVSIGTSR.S
sp|Q8HXP2|SODM_MACMU	K.AIWNVINWENVTER.Y
sp|Q8HXP2|SODM_MACMU	K.DFGSFEK.F
sp|Q8HXP2|SODM_MACMU	K.GDVTAQIALQPALK.F
sp|Q8HXP2|SODM_MACMU	K.YQEALAK.G
sp|Q8HXQ0|SODC_MACMU	D.SPVQGTINFEQK.E
sp|Q8HXQ0|SODC_MACMU	K.ADDLGKGGNEESK.K
sp|Q8HXQ0|SODC_MACMU	K.AVCVLKGDSPVQGTINFEQK.E
sp|Q8HXQ0|SODC_MACMU	K.AVCVLKGDSPVQGTINFEQKES.N
sp|Q8HXQ0|SODC_MACMU	K.AVCVLKGDSPVQGTINFEQKESN.G
sp|Q8HXQ0|SODC_MACMU	K.ESNGPVK.V
sp|Q8HXQ0|SODC_MACMU	K.GDSPVQG.T
sp|Q8HXQ0|SODC_MACMU	K.GDSPVQGTINFEQK.E
sp|Q8HXQ0|SODC_MACMU	K.GDSPVQGTINFEQKE.S
sp|Q8HXQ0|SODC_MACMU	K.GDSPVQGTINFEQKES.N
sp|Q8HXQ0|SODC_MACMU	K.GDSPVQGTINFEQKESN.G
sp|Q8HXQ0|SODC_MACMU	K.VSFEDSVI.S
sp|Q8HXQ0|SODC_MACMU	K.VSFEDSVISL.S
sp|Q8HXQ0|SODC_MACMU	K.VSFEDSVISLSGDHSIIGR.T
sp|Q8HXQ0|SODC_MACMU	K.VSFEDSVISLSGDHSIIGRT.L
sp|Q8HXQ0|SODC_MACMU	R.HVGDLGNVTAGK.D
sp|Q8HXQ0|SODC_MACMU	R.HVGDLGNVTAGKDGVAK.V
sp|Q8HXQ0|SODC_MACMU	R.LACGVIGIAQ.-
sp|Q8HXQ0|SODC_MACMU	R.QHGGPKDEER.H
sp|Q8HXQ0|SODC_MACMU	R.TLVVHEK.A
sp|Q8HXQ0|SODC_MACMU	R.TLVVHEKADDLGK.G
sp|Q8HXQ0|SODC_MACMU	R.TLVVHEKADDLGKGGNEESKK.T
sp|Q8MIZ1|CXL10_MACMU	R.CLNPESK.A
sp|Q8SPN5|RNAS1_MACMU	C.EGSPHVPVHFDASVEDST.-
sp|Q8SPN5|RNAS1_MACMU	F.VHEPLVDVQNVCFQEK.V
sp|Q8SPN5|RNAS1_MACMU	G.SPHVPVHFDASVEDST.-
sp|Q8SPN5|RNAS1_MACMU	K.ERHIIVAC.E
sp|Q8SPN5|RNAS1_MACMU	K.NGQTNCFK.S
sp|Q8SPN5|RNAS1_MACMU	K.SSM*HITDCR.L
sp|Q8SPN5|RNAS1_MACMU	K.SSMHITDCR.L
sp|Q8SPN5|RNAS1_MACMU	K.VTCKNGQTNCFK.S
sp|Q8SPN5|RNAS1_MACMU	R.CKPVNTFVHEPLVDVQNVCFQEK.V
sp|Q8SPN5|RNAS1_MACMU	R.HIIVACEG.S
sp|Q8SPN5|RNAS1_MACMU	R.HIIVACEGSPH.V
sp|Q8SPN5|RNAS1_MACMU	R.HIIVACEGSPHVPVHFDASVEDST.-
sp|Q8SPN5|RNAS1_MACMU	R.LTNGSRYPN.C
sp|Q8SPN5|RNAS1_MACMU	R.LTNGSRYPNCAYR.T
sp|Q8SPN5|RNAS1_MACMU	R.YPNCAY.R
sp|Q8SPN5|RNAS1_MACMU	R.YPNCAYR.T
sp|Q8WMG7|NLGNX_MACMU	K.TGPEDTTVLIETK.R
sp|Q8WN63|ANGI_MACMU	K.DINTFVHGNR.H
sp|Q8WN63|ANGI_MACMU	K.HYDATPQG.R
sp|Q8WN63|ANGI_MACMU	K.HYDATPQGR.N
sp|Q8WN63|ANGI_MACMU	P.TLAQDNPR.Y
sp|Q8WN63|ANGI_MACMU	R.AGLQVYNQCWK.F
sp|Q8WN63|ANGI_MACMU	R.GGSPRPPCQYR.A
sp|Q8WN63|ANGI_MACMU	R.HHITAICGDENGSPYGGNLR.I
sp|Q8WN63|ANGI_MACMU	R.ISTSPFQVTTCK.L
sp|Q8WN63|ANGI_MACMU	R.ISTSPFQVTTCKLRGGSPRPP.C
sp|Q8WN63|ANGI_MACMU	R.NDRYCESTM*R.R
sp|Q8WN63|ANGI_MACMU	R.NDRYCESTMR.R
sp|Q8WN63|ANGI_MACMU	R.NIVVGCENGLPVHLDESIF.R
sp|Q8WN63|ANGI_MACMU	R.NIVVGCENGLPVHLDESIFRP.-
sp|Q8WN63|ANGI_MACMU	R.YCESTM*R.R
sp|Q8WN63|ANGI_MACMU	R.YCESTMR.R
sp|Q8WN63|ANGI_MACMU	R.YRDFLAK.H
sp|Q95196|SEMG2_MACMU	K.ISYQSSSTEER.R
sp|Q95198|LYAM1_MACMU	K.AEIEYLEK.T
sp|Q95198|LYAM1_MACMU	K.NKEDCVEIYIK.R
sp|Q95198|LYAM1_MACMU	K.SLTQEAENWGDGEPNNKK.N
sp|Q95198|LYAM1_MACMU	K.TLPFSPSYYWIGIR.K
sp|Q95KL9|TIMP1_MACMU	A.CTCVLPHPQTAFCNSDLVIR.A
sp|Q95KL9|TIMP1_MACMU	C.SFVAPWNSLSLAQR.R
sp|Q95KL9|TIMP1_MACMU	F.CNSDIVIR.A
sp|Q95KL9|TIMP1_MACMU	K.GFQALGDAA.D
sp|Q95KL9|TIMP1_MACMU	K.GFQALGDAADIR.F
sp|Q95KL9|TIMP1_MACMU	K.LQDGLLHITTCSFVAPWNSLSLAQR.R
sp|Q95KL9|TIMP1_MACMU	K.LQSGTHC.L
sp|Q95KL9|TIMP1_MACMU	K.LQSGTHCLWTDQLLQGSEK.G
sp|Q95KL9|TIMP1_MACMU	K.M*YKGFQALGDAADIR.F
sp|Q95KL9|TIMP1_MACMU	K.MYKGFQALGDAADIR.F
sp|Q95KL9|TIMP1_MACMU	K.TYTVGCEECTVFPC.L
sp|Q95KL9|TIMP1_MACMU	K.TYTVGCEECTVFPCLSIPCK.L
sp|Q95KL9|TIMP1_MACMU	R.EPGLCTWQ.S
sp|Q95KL9|TIMP1_MACMU	R.EPGLCTWQSL.R
sp|Q95KL9|TIMP1_MACMU	R.EPGLCTWQSLR.T
sp|Q95KL9|TIMP1_MACMU	R.EPGLCTWQSLRT.R
sp|Q95KL9|TIMP1_MACMU	R.FVYTPAM*ESVCGYFHR.S
sp|Q95KL9|TIMP1_MACMU	R.FVYTPAMESVCGYFHR.S
sp|Q95KL9|TIMP1_MACMU	R.SEEFLIAGK.L
sp|Q95M25|LEAP2_MACMU	R.CSLSVAQE.-
sp|Q9BG90|SRY_MACMU	R.DQKRKMALENPK.M
sp|Q9GLV5|CAMP_MACMU	K.SPEDCDFKEDGLVK.R
sp|Q9GLV5|CAMP_MACMU	K.SPEDCDFKEDGLVKR.C
sp|Q9GLV5|CAMP_MACMU	R.AIDGINQR.S
sp|Q9GLV5|CAMP_MACMU	R.CVGTVILNQAR.D
sp|Q9GLV5|CAMP_MACMU	R.DSFDISCDK.D
sp|Q9GLV5|CAMP_MACMU	R.DSFDISCDKDN.R
sp|Q9GLV5|CAMP_MACMU	R.DSFDISCDKDNR.R
sp|Q9GLV5|CAMP_MACMU	R.DSFDISCDKDNRR.S
sp|Q9GLV5|CAMP_MACMU	R.SSDANLYR.L
sp|Q9GLV5|CAMP_MACMU	R.SSDANLYRLLDLDPRPTM.D
sp|Q9MYL0|LEPR_MACMU	K.ISWEKPVFPENNLQFQI.R
sp|Q9MYL0|LEPR_MACMU	K.ISWSSPPLVPFPLQYEVK.Y
sp|Q9N0Y0|VAMP2_MACMU	K.LSELDDRADALQAGASQF.E
sp|Q9N0Y0|VAMP2_MACMU	K.LSELDDRADALQAGASQFETS.A
sp|Q9N0Y0|VAMP2_MACMU	R.ADALQAGASQFETSAAK.L
sp|Q9N0Y0|VAMP2_MACMU	R.LQQTQAQVDE.V
sp|Q9N0Y0|VAMP2_MACMU	R.LQQTQAQVDEVVD.I
sp|Q9N0Y0|VAMP2_MACMU	R.LQQTQAQVDEVVDIM*R.V
sp|Q9N0Y0|VAMP2_MACMU	R.LQQTQAQVDEVVDIMR.V
sp|Q9N0Y0|VAMP2_MACMU	R.RLQQTQAQVDE.V
sp|Q9N0Y0|VAMP2_MACMU	R.RLQQTQAQVDEVVDIM*R.V
sp|Q9N0Y0|VAMP2_MACMU	R.RLQQTQAQVDEVVDIMR.V
sp|Q9N0Y0|VAMP2_MACMU	R.VNVDKVLER.D
sp|Q9XSW6|NPY_MACMU	P.SKPDNPGEDAPAEDM*AR.Y
sp|Q9XSW6|NPY_MACMU	P.SKPDNPGEDAPAEDMAR.Y
sp|Q9XSW6|NPY_MACMU	P.SKPDNPGEDAPAEDMARYYSALR.H
sp|Q9XSW6|NPY_MACMU	R.ESTENVPR.T
sp|Q9XSW6|NPY_MACMU	R.ESTENVPRT.R
sp|Q9XSW6|NPY_MACMU	R.LEDPSM*W.-
sp|Q9XSW6|NPY_MACMU	R.LEDPSMW.-
sp|Q9XSW6|NPY_MACMU	R.SSPETLISDLLM*.R
sp|Q9XSW6|NPY_MACMU	R.SSPETLISDLLM*R.E
sp|Q9XSW6|NPY_MACMU	R.SSPETLISDLLMR.E
sp|Q9XSW6|NPY_MACMU	R.TRLEDPSM*W.-
tr|A0A0B4J1D0|A0A0B4J1D0_MACMU	G.YAQNFQGR.V
tr|A0A0B4J1D0|A0A0B4J1D0_MACMU	K.ASGYTFTSY.Y
tr|A0A0B4J1D0|A0A0B4J1D0_MACMU	K.ASGYTFTSYYMHWVRQAPG.Q
tr|A0A0B4J1D0|A0A0B4J1D0_MACMU	K.GYAQNFQGR.V
tr|A0A0B4J1D0|A0A0B4J1D0_MACMU	R.SEDTAVYYCTR.-
tr|A0A0B4J1D0|A0A0B4J1D0_MACMU	T.DTSTSTGYMELSSLR.S
tr|A0A0B4J1D2|A0A0B4J1D2_MACMU	K.DTSKNQVVLTMTNMDPVDTATYYCAR.V
tr|A0A0B4J1D2|A0A0B4J1D2_MACMU	K.ESGPALVK.P
tr|A0A0B4J1D2|A0A0B4J1D2_MACMU	K.NQVVLTM*TNM*DPVDTATYYCAR.V
tr|A0A0B4J1D2|A0A0B4J1D2_MACMU	K.NQVVLTM*TNMDPVDTATYYCAR.V
tr|A0A0B4J1D2|A0A0B4J1D2_MACMU	K.NQVVLTMTNM*DPVDTATYYCAR.V
tr|A0A0B4J1D2|A0A0B4J1D2_MACMU	K.NQVVLTMTNMDPVDTATYYCAR.V
tr|A0A0B4J1D2|A0A0B4J1D2_MACMU	K.YYSTSLK.S
tr|A0A0B4J1D2|A0A0B4J1D2_MACMU	R.LTISKDTSK.N
tr|A0A0B4J1D2|A0A0B4J1D2_MACMU	V.DTATYYCAR.V
tr|A2BDG6|A2BDG6_MACMU	R.VAAAGAAAGAAAGAAAGLAAGSGWR.R
tr|A2BDG6|A2BDG6_MACMU	R.YGAPGSSLR.V
tr|A3FEZ5|A3FEZ5_MACMU	A.YVDDTQFVR.F
tr|A3FEZ5|A3FEZ5_MACMU	K.DYIALNEDLR.S
tr|A3FEZ5|A3FEZ5_MACMU	K.WGAVVVPSGEEQR.Y
tr|A3FEZ5|A3FEZ5_MACMU	R.DGEDQTQDTELVETRPAGDGTFQK.W
tr|A3FEZ5|A3FEZ5_MACMU	R.FDSDAESPR.E
tr|A4K2T4|A4K2T4_MACMU	K.CCEGSCGM*ACM*VPQ.-
tr|A4K2T4|A4K2T4_MACMU	K.CCEGSCGMACMVPQ.-
tr|A4K2T4|A4K2T4_MACMU	R.CLKDTDCPGIK.K
tr|A4Q982|A4Q982_MACMU	R.FDSDVGEYR.A
tr|B2ZNZ3|B2ZNZ3_MACMU	R.NSSPQPPTQAP.-
tr|B3Y6B8|B3Y6B8_MACMU	A.TTPEPCELDDEDFR.C
tr|B3Y6B8|B3Y6B8_MACMU	H.SLDLSHNSLR.A
tr|B3Y6B8|B3Y6B8_MACMU	K.FPALQNLALR.N
tr|B3Y6B8|B3Y6B8_MACMU	K.VLSIAQAHSPAFSCEQVR.A
tr|B3Y6B8|B3Y6B8_MACMU	L.EATGLALSSLR.L
tr|B3Y6B8|B3Y6B8_MACMU	R.AFPALTSLDLSDNPGLGER.G
tr|B3Y6B8|B3Y6B8_MACMU	R.ATANPSAPR.C
tr|B3Y6B8|B3Y6B8_MACMU	R.CM*WSSALNSLNLSFAGLEQVPK.G
tr|B3Y6B8|B3Y6B8_MACMU	R.CMWSSALNSLNLSFAGLEQVPK.G
tr|B3Y6B8|B3Y6B8_MACMU	R.GLIAALCPH.K
tr|B3Y6B8|B3Y6B8_MACMU	R.GLIAALCPHK.F
tr|B3Y6B8|B3Y6B8_MACMU	R.GLIAALCPHKFPALQNLALR.N
tr|B3Y6B8|B3Y6B8_MACMU	R.LQELTLED.L
tr|B3Y6B8|B3Y6B8_MACMU	R.LQELTLEDLEITGT.M
tr|B3Y6B8|B3Y6B8_MACMU	R.LQELTLEDLEITGTM*PPLPL.E
tr|B3Y6B8|B3Y6B8_MACMU	R.LQELTLEDLEITGTM*PPLPLEA.T
tr|B3Y6B8|B3Y6B8_MACMU	R.LQELTLEDLEITGTM*PPLPLEATGLALSSLR.L
tr|B3Y6B8|B3Y6B8_MACMU	R.LQELTLEDLEITGTMPPLPLEATGLALSSLR.L
tr|B3Y6B8|B3Y6B8_MACMU	R.LQELTLEDLEITGTMPPLPLEATGLALSSLRLHNVSWAT.G
tr|B3Y6B8|B3Y6B8_MACMU	R.LQELTLEDLEITGTMPPLPLEATGLALSSLRLHNVSWATGRS.W
tr|B3Y6B8|B3Y6B8_MACMU	R.LTVGAAQVPAQLLVGALR.V
tr|B3Y6B8|B3Y6B8_MACMU	R.NTGM*ETP.T
tr|B3Y6B8|B3Y6B8_MACMU	R.NTGM*ETPT.G
tr|B3Y6B8|B3Y6B8_MACMU	R.NTGM*ETPTGVC.A
tr|B3Y6B8|B3Y6B8_MACMU	R.NTGM*ETPTGVCAALAAAGVQPH.S
tr|B3Y6B8|B3Y6B8_MACMU	R.NTGMETPT.G
tr|B3Y6B8|B3Y6B8_MACMU	R.NTGMETPTGVCAALAAAGVQPH.S
tr|B3Y6B8|B3Y6B8_MACMU	R.QYADTIK.A
tr|B3Y6B8|B3Y6B8_MACMU	R.RLTVGAAQVPAQLLVGALR.V
tr|B3Y6B8|B3Y6B8_MACMU	R.RPRPDELPQVDNLALDGNPFLV.P
tr|B3Y6B8|B3Y6B8_MACMU	R.VDPDADPR.Q
tr|B3Y6B8|B3Y6B8_MACMU	R.VGGLSLEPF.L
tr|B3Y6B8|B3Y6B8_MACMU	R.VGGLSLEPFLT.R
tr|B3Y6B8|B3Y6B8_MACMU	R.VGGLSLEPFLTR.V
tr|B3Y6B8|B3Y6B8_MACMU	R.VGGLSLEPFLTRVDPDADPR.Q
tr|B3Y6B8|B3Y6B8_MACMU	R.VLDLSCNR.L
tr|B3Y6B8|B3Y6B8_MACMU	T.TPEPCELDDEDFR.C
tr|B6EBK4|B6EBK4_MACMU	R.EQANLNSR.T
tr|F5CI18|F5CI18_MACMU	K.CDEPILSNR.S
tr|F5CI18|F5CI18_MACMU	K.FKVASFR.K
tr|F5CI18|F5CI18_MACMU	K.GNDISSGT.V
tr|F5CI18|F5CI18_MACMU	K.GNDISSGTVLSDYVGSGPPK.G
tr|F5CI18|F5CI18_MACMU	K.KYELGAPVAG.A
tr|F5CI18|F5CI18_MACMU	K.KYELGAPVAGACYQAEWDDYVPK.L
tr|F5CI18|F5CI18_MACMU	K.LYEQLSGK.-
tr|F5CI18|F5CI18_MACMU	K.LYTLVLTDPDAPSR.K
tr|F5CI18|F5CI18_MACMU	K.LYTLVLTDPDAPSRK.D
tr|F5CI18|F5CI18_MACMU	K.LYTLVLTDPDAPSRKDPK.Y
tr|F5CI18|F5CI18_MACMU	K.NRPTSISWDGLDSGK.L
tr|F5CI18|F5CI18_MACMU	K.NRPTSISWDGLDSGKLYTLVLTDPDAPSR.K
tr|F5CI18|F5CI18_MACMU	K.VLTPTQVK.N
tr|F5CI18|F5CI18_MACMU	K.WSGPLSLQEVDEQPQHPLHVTYAGAALDELGK.V
tr|F5CI18|F5CI18_MACMU	K.YELGAPVAG.A
tr|F5CI18|F5CI18_MACMU	K.YELGAPVAGACYQAEWDDYVPK.L
tr|F5CI18|F5CI18_MACMU	R.KKYELGAPVAGACYQAEWDDYVPK.L
tr|F5CI18|F5CI18_MACMU	R.YVWLVYEQAR.P
tr|F5CI18|F5CI18_MACMU	R.YVWLVYEQARPLK.C
tr|F5CI18|F5CI18_MACMU	R.YVWLVYEQARPLKCDEPILSNR.S
tr|F5CI18|F5CI18_MACMU	Y.AGAALDELGK.V
tr|F5CI18|F5CI18_MACMU	Y.QAEWDDYVPK.L
tr|F6PIN3|F6PIN3_MACMU	K.ADLINNLGTIAK.S
tr|F6PIN3|F6PIN3_MACMU	K.ADLINNLGTIAKSEDQTEY.L
tr|F6PIN3|F6PIN3_MACMU	K.EKYIDQEELNK.T
tr|F6PIN3|F6PIN3_MACMU	K.EQVANSAFVER.V
tr|F6PIN3|F6PIN3_MACMU	K.IDIIPNPQER.T
tr|F6PIN3|F6PIN3_MACMU	K.SLTNDWEDHLAVK.H
tr|F6PIN3|F6PIN3_MACMU	K.TKPIWTR.N
tr|F6PIN3|F6PIN3_MACMU	K.YIDQEELNK.T
tr|F6PIN3|F6PIN3_MACMU	R.GFEVVYMTEPIDEYCVQQLK.E
tr|F6PIN3|F6PIN3_MACMU	R.NPDDITQEEYGEFYK.S
tr|F6PIN3|F6PIN3_MACMU	R.TLTIVDTGIGMTK.A
tr|F6PIN3|F6PIN3_MACMU	R.TLTIVDTGIGMTKADLINNLGTIAK.S
tr|F6PIN3|F6PIN3_MACMU	R.YESLTDPSK.L
tr|F6PIN3|F6PIN3_MACMU	R.YESLTDPSKLDSGK.E
tr|F6PIN3|F6PIN3_MACMU	R.YESLTDPSKLDSGKELK.I
tr|F6PJ83|F6PJ83_MACMU	K.VETYNEESRIKATVM*DVK.S
tr|F6PJ83|F6PJ83_MACMU	M.YQACPTQECNKK.V
tr|F6PJA1|F6PJA1_MACMU	K.DIHFEGGDIATVFTPSAK.H
tr|F6PJA1|F6PJA1_MACMU	K.DIYVDLDM*K.G
tr|F6PJA1|F6PJA1_MACMU	K.DSVTETLPR.V
tr|F6PJA1|F6PJA1_MACMU	K.SCALSNLACIR.D
tr|F6PJA1|F6PJA1_MACMU	K.VVTGFSLK.S
tr|F6PJA1|F6PJA1_MACMU	R.DVFPNTVFADSNIDSVMAPDAFVCR.R
[truncated: 26,648 more rows]
