# Supplementary material for: Preconditioning in the Rhesus Macaque Induces a Proteomic Signature Following Cerebral Ischemia that Is Associated with Neuroprotection
Source: Springer Nature journal article supplement (doi:10.1007/s12975-018-0670-7), 2018-10-19
Supplement: MOESM5 [file 16212868]

## Sheet: Macaque Protein Mapped to Human
Title: Preconditioning in the rhesus macaque induces a proteomic signature following cerebral ischemia that is associated with neuroprotection.
Journal: Translational Stroke Research
Authors: Susan L Stevens, Tao Liu, Frances Rena Bahjat, Vladislav A. Petyuk, Athena A. Schepmoes, Ryan L. Sontag, Marina A. Gritsenko, Chaochao Wu, Sheng Wang,
Anil K. Shukla, Jon M. Jacobs, Richard D. Smith, Karin D. Rodland, G. Alexander West, Steven G. Kohama, Christine Glynn, Mary P. Stenzel-Poore
Corresponding Author: Dr. Mary Stenzel-Poore; Department of Molecular Microbiology and Immunology, Oregon Health & Science University, Portland, Oregon, USA; E-mail: poorem@ohsu.edu
Supplementary Table 4: Macaque proteins that mapped to human orthologues using the InParanoid database*.
*Values calculated as ratio of sample abundance to abundance of pooled reference and then log2 transformed to obtain relative expression values.
InParanoid_Ortho_Group_ID	UniProt_Hsa	UniProt_Mmu	Protein	GeneSymbol_Hsa	CNTL1	CNTL2	CNTL3	CNTL4	CNTL5	DP1	DP2	DP3	DP4	DP5	DNP1	DNP2	DNP3	DNP4	DNP5	Naive1	Naive2	Naive3	Naive4
12409	A0PJX4	F7F4E1	tr|F7F4E1|F7F4E1_MACMU	SHISA3	NA	NA	NA	NA	NA	NA	NA	NA	NA	NA	NA	NA	NA	NA	NA	-0.863	0.0237	0.0867	-0.0237
180	A2RRP1	F7F4R5	tr|F7F4R5|F7F4R5_MACMU	NBAS	NA	NA	NA	NA	NA	NA	NA	NA	NA	NA	NA	NA	NA	NA	NA	0.00879	-0.222	0.0225	-0.00879
4551	A2RU67	F6UQ54	tr|F6UQ54|F6UQ54_MACMU	FAM234B	NA	NA	NA	NA	NA	NA	NA	NA	0.214	-0.653	-0.277	-0.227	0	0.0169	-0.194	-0.214	0.314	0.283	0.648
1313	A2RUS2	F7GUE8	tr|F7GUE8|F7GUE8_MACMU	DENND3	NA	NA	NA	NA	NA	NA	NA	NA	NA	NA	NA	NA	NA	NA	NA	-0.00326	0.0189	0.00326	-0.0192
15293	A2VDF0	F7HIM6	tr|F7HIM6|F7HIM6_MACMU	FUOM	NA	NA	NA	NA	NA	NA	NA	NA	NA	NA	NA	NA	NA	NA	NA	-0.0888	0.165	0.0888	-0.098
663	A2VDJ0	F7EGI4	tr|F7EGI4|F7EGI4_MACMU	KIAA0922	NA	NA	NA	NA	NA	NA	NA	NA	NA	NA	NA	NA	NA	NA	NA	0.318	-0.7	-0.263	0.263
1793	A4D0V7	F6PKV8	tr|F6PKV8|F6PKV8_MACMU	CPED1	-0.0183	0.259	-0.0086	0.191	-0.345	0.0086	0.25	-0.358	NA	NA	NA	NA	NA	NA	NA	NA	NA	NA	NA
68	A4UGR9	F6ZJF6	tr|F6ZJF6|F6ZJF6_MACMU	XIRP2	NA	NA	NA	NA	NA	NA	NA	NA	-0.145	0.389	0	0.145	-0.247	-0.379	0.0309	NA	NA	NA	NA
1758	A6BM72	F7HLD7	tr|F7HLD7|F7HLD7_MACMU	MEGF11	-0.29	-0.255	-0.189	-0.232	-0.0296	0.0942	0.128	0.304	0.12	0	-0.56	0.145	-0.198	-0.225	-0.0663	0.203	0.299	0.267	0.0478
16318	A6NC86	F6QRK5	tr|F6QRK5|F6QRK5_MACMU	PINLYP	-0.412	-0.237	0.236	-0.17	0	0.129	0.729	1.73	0.578	1.51	-0.623	-0.368	-0.736	-0.485	1.13	NA	NA	NA	NA
13290	A6NCQ9	F7DVF1	tr|F7DVF1|F7DVF1_MACMU	RNF222	NA	NA	NA	NA	NA	NA	NA	NA	0.313	-0.117	0.1	0	-0.661	-0.0625	0.11	NA	NA	NA	NA
5371	A6NGE4	F6ZUV5	tr|F6ZUV5|F6ZUV5_MACMU	DCAF8L1	NA	NA	NA	NA	NA	NA	NA	NA	0.274	-0.0668	0	0.0204	-1.26	-0.653	0.501	NA	NA	NA	NA
15634	A6NJ16	H9H576	tr|H9H576|H9H576_MACMU		NA	NA	NA	NA	NA	NA	NA	NA	0.0047	1.45	-0.0119	-0.282	1.23	-0.531	0	NA	NA	NA	NA
15897	A6NJS3	H9H495	tr|H9H495|H9H495_MACMU		-0.976	-0.594	0.157	0	0.331	-0.212	1.16	0.672	0.58	-0.132	-0.407	0.873	-0.556	-0.45	0.778	1.02	-0.344	-0.501	0.58
14456	A6NLP5	F7FZ36	tr|F7FZ36|F7FZ36_MACMU	TTC36	NA	NA	NA	NA	NA	NA	NA	NA	NA	NA	NA	NA	NA	NA	NA	-0.173	0.257	-0.52	0.173
13725	A6NLU5	H9H377	tr|H9H377|H9H377_MACMU	VSTM2B	0.246	-0.035	-0.283	0.0907	-0.154	0.0333	0	-0.139	-0.0583	-0.157	0.0508	0.0955	0.0467	0.318	-0.227	-0.0732	0.36	0.691	-0.056
1091	A7MBM2	F7E6M7	tr|F7E6M7|F7E6M7_MACMU	DISP2	-0.0169	-0.371	-0.345	0.0561	-0.26	0.241	-0.191	0	-0.0393	0.148	-0.135	0.177	0.145	0.557	-0.131	0.0585	0.0531	0.639	-0.315
5075	A8K979	F7APV0	tr|F7APV0|F7APV0_MACMU	ERI2	NA	NA	NA	NA	NA	NA	NA	NA	0.0886	-0.127	0.283	0	-0.154	-0.224	0.632	NA	NA	NA	NA
4242	A9YTQ3	F6RS45	tr|F6RS45|F6RS45_MACMU	AHRR	-0.437	-0.47	0.0585	-0.0349	-0.583	0.319	0.056	0.275	0.172	0	-0.276	0.237	-0.318	-0.278	0.242	NA	NA	NA	NA
12503	B1AL88	F7HHG3	tr|F7HHG3|F7HHG3_MACMU	FAM155A	-0.423	-0.425	0.0808	-0.375	0.115	-0.0808	0.35	0.116	NA	NA	NA	NA	NA	NA	NA	NA	NA	NA	NA
14919	B2RUY7	F6X639	tr|F6X639|F6X639_MACMU	VWC2L	NA	NA	NA	NA	NA	NA	NA	NA	0.593	-1.38	0	0.497	-0.303	0.32	-1.45	NA	NA	NA	NA
726	B5MCY1	F7CET4	tr|F7CET4|F7CET4_MACMU	TDRD15	NA	NA	NA	NA	NA	NA	NA	NA	0.00567	0.33	0.0436	-0.505	0	-0.358	-0.148	NA	NA	NA	NA
11855	C9JMV9	F6PY01	tr|F6PY01|F6PY01_MACMU		-0.255	-0.188	0.179	0.0327	-0.0426	0.04	0.452	0.459	0.259	0.171	-0.137	0.248	0.161	-0.172	-0.205	0	-0.116	-0.364	-0.0391
8119	C9JR72	F6XG13	tr|F6XG13|F6XG13_MACMU	KBTBD13	NA	NA	NA	NA	NA	NA	NA	NA	-0.186	0	-0.0423	-0.0798	1.36	0.00639	0.571	NA	NA	NA	NA
16102	E7EM73	F7B5D9	tr|F7B5D9|F7B5D9_MACMU		NA	NA	NA	NA	NA	NA	NA	NA	0.421	-0.206	0.445	0	-0.353	-0.312	0.148	NA	NA	NA	NA
1955	E7EW31	F7CZ22	tr|F7CZ22|F7CZ22_MACMU	PROB1	-0.0609	-0.221	-0.0966	0.0609	0.0627	0.477	-0.279	0.158	NA	NA	NA	NA	NA	NA	NA	NA	NA	NA	NA
1554	H0Y858	F6UZJ0	tr|F6UZJ0|F6UZJ0_MACMU		0.254	0.15	0.0617	0.153	0.104	0.0912	-0.216	-0.00193	-0.114	0.0666	0.153	-0.23	-0.149	0	0.0396	-0.81	-0.691	-0.813	-0.564
15829	H7C1X1	F7G0V7	tr|F7G0V7|F7G0V7_MACMU		-0.306	-0.235	-0.763	0.419	0.13	-0.519	0.0695	0.376	-0.723	0.605	0.418	0.308	-0.742	-0.634	0.341	1.27	0.157	-0.448	0.83
10696	O00115	F6YXJ2	tr|F6YXJ2|F6YXJ2_MACMU	DNASE2	0	-0.302	0.12	-0.582	0.0382	0.34	-0.507	-0.271	0.16	-0.0497	0.11	-0.4	0.0825	-0.0809	-0.17	0.552	0.0639	0.0205	-0.0921
3760	O00139	F6X5C6	tr|F6X5C6|F6X5C6_MACMU	KIF2A	NA	NA	NA	NA	NA	NA	NA	NA	0.527	0.15	-0.399	0.438	-0.431	-0.462	0	NA	NA	NA	NA
2066	O00159	F7BZA5	tr|F7BZA5|F7BZA5_MACMU	MYO1C	NA	NA	NA	NA	NA	NA	NA	NA	0.0969	0.095	-1.03	0	-1.37	0.18	0.549	-0.00794	0.182	-0.266	-0.0574
15601	O00175	F6TX08	tr|F6TX08|F6TX08_MACMU	CCL24	NA	NA	NA	NA	NA	NA	NA	NA	-0.0796	-0.529	0.691	-0.555	0.166	0.112	-0.0614	0.351	0.506	-0.0742	0
10633	O00180	F6X4F1	tr|F6X4F1|F6X4F1_MACMU	KCNK1	NA	NA	NA	NA	NA	NA	NA	NA	NA	NA	NA	NA	NA	NA	NA	-0.0585	0.266	-0.287	0.0585
3589	O00187	F6SW75	tr|F6SW75|F6SW75_MACMU	MASP2	-0.322	-0.394	0.157	0.342	-0.0863	0	0.71	0.541	0.131	0.523	-0.334	-0.0913	0.364	-0.171	0.603	-0.174	-0.578	-0.575	0.143
10541	O00231	F6Y609	tr|F6Y609|F6Y609_MACMU	PSMD11	-0.077	0.306	-0.222	0.494	-0.405	0.000114	-0.171	-0.254	-0.243	0.061	0	-0.44	-0.296	0.0255	0.0326	0.18	0.304	0.372	-0.128
7346	O00232	F6UPJ2	tr|F6UPJ2|F6UPJ2_MACMU	PSMD12	-0.167	-0.0281	0.235	0.231	-0.108	-0.113	0.284	0.32	0.173	0.478	-0.0953	-0.0943	-0.296	0.0102	0.115	0.151	-0.427	-0.75	0
16210	O00244	F6Y7M3	tr|F6Y7M3|F6Y7M3_MACMU	ATOX1	1.01	0.54	0.24	0.0166	0.196	-0.766	-0.571	-0.845	-0.607	-0.301	0.481	0.184	0.425	-0.329	-0.451	-0.149	-0.293	0.136	0
15194	O00253	F7H591	tr|F7H591|F7H591_MACMU	AGRP	NA	NA	NA	NA	NA	NA	NA	NA	NA	NA	NA	NA	NA	NA	NA	-0.561	0.118	0.444	-0.118
13721	O00264	F7BA07	tr|F7BA07|F7BA07_MACMU	PGRMC1	0.0212	-0.113	0.0062	-0.103	-0.0104	0.0456	0	-0.231	-0.164	-0.00404	0.0852	-0.131	-0.128	0.0529	-0.113	0.19	0.0958	0.47	0.193
10885	O00273	F7HGW2	tr|F7HGW2|F7HGW2_MACMU	DFFA	NA	NA	NA	NA	NA	NA	NA	NA	NA	NA	NA	NA	NA	NA	NA	0.00642	-0.00642	0.463	-0.175
2256	O00339	F7GQT9	tr|F7GQT9|F7GQT9_MACMU	MATN2	0.0232	-0.0375	0.137	-0.29	-0.0742	-0.109	0.236	-0.00882	0.038	0	0.0247	-0.0812	-0.076	0.0122	-0.178	0.151	0.244	0.0165	-0.0303
3322	O00391	F7HHU1	tr|F7HHU1|F7HHU1_MACMU	QSOX1	-0.153	-0.118	-0.197	-0.139	-0.238	0.128	0.0727	0.109	0.0944	0.00208	-0.136	0	-0.0975	-0.086	-0.182	0.173	0.0509	0.167	0.308
1340	O00410	F6Z6Q9	tr|F6Z6Q9|F6Z6Q9_MACMU	IPO5	NA	NA	NA	NA	NA	NA	NA	NA	NA	NA	NA	NA	NA	NA	NA	0.21	-0.138	0.138	-0.482
9411	O00451	F7E8A0	tr|F7E8A0|F7E8A0_MACMU	GFRA2	0.176	0.389	-0.199	0.144	0	-0.268	-0.112	-0.29	-0.205	-0.23	-0.104	0.457	-0.181	0.192	-0.231	0.125	0.403	0.545	0.15
3746	O00461	H9H468	tr|H9H468|H9H468_MACMU	GOLIM4	-0.135	-0.0218	0.0159	-0.215	0.0378	-0.0295	0.172	0.216	0.374	-0.121	-0.0555	0.0533	-0.0689	-0.0416	0	0.293	0.435	0.316	-0.022
2536	O00462	F6S0B9	tr|F6S0B9|F6S0B9_MACMU	MANBA	0.101	-0.269	-0.107	-0.251	-0.177	0.0594	-0.0927	-0.151	0.0661	0.124	0.177	-0.312	-0.413	0.067	-0.107	0.198	0	0.0448	0.106
447	O00468	F7G642	tr|F7G642|F7G642_MACMU	AGRN	-0.114	-0.0829	-0.0988	0.0522	-0.0511	0.129	0	-0.106	0.0862	-0.133	0.0924	-0.0962	-0.0133	0.23	-0.147	0.144	0.208	0.378	0.26
3723	O00469	F6WSU7	tr|F6WSU7|F6WSU7_MACMU	PLOD2	-0.0296	-0.0758	0.0165	-0.476	-0.0727	0	0.293	0.11	-0.00773	-0.0766	-0.0143	-0.000534	0.422	0.0716	0.0685	1.01	0.306	-0.058	0.117
10649	O00487	F7HMX1	tr|F7HMX1|F7HMX1_MACMU	PSMD14	NA	NA	NA	NA	NA	NA	NA	NA	NA	NA	NA	NA	NA	NA	NA	-0.176	-0.262	0.417	0.176
1136	O00533	F7B8S4	tr|F7B8S4|F7B8S4_MACMU	CHL1	0.171	0.26	-0.247	0.199	0.0722	-0.378	-0.319	-0.355	0	-0.326	-0.236	0.394	0.0163	0.381	-0.302	-0.146	0.0516	0.57	-0.249
4302	O00566	F6VJQ2	tr|F6VJQ2|F6VJQ2_MACMU	MPHOSPH10	NA	NA	NA	NA	NA	NA	NA	NA	0	0.259	0.712	0.662	-0.758	-0.519	-0.185	NA	NA	NA	NA
6141	O00567	F6R553	tr|F6R553|F6R553_MACMU	NOP56	NA	NA	NA	NA	NA	NA	NA	NA	NA	NA	NA	NA	NA	NA	NA	-0.188	0.188	-0.613	0.189
11979	O00584	F7ASF6	tr|F7ASF6|F7ASF6_MACMU	RNASET2	-0.152	-0.435	0	-0.34	-0.0604	0.32	-0.173	0.0027	0.147	-0.0976	0.324	-0.466	0.0265	0.0107	-0.0542	0.815	0.705	-0.202	0.33
12666	O00587	F6VUT4	tr|F6VUT4|F6VUT4_MACMU	MFNG	-0.0744	-0.173	0	-0.248	-0.0363	-0.142	0.106	0.0162	0.183	0.0268	-0.0179	0.0623	0.0049	0.0316	-0.0236	-0.148	-0.0776	0.119	0.0813
10543	O00602	F7BW36	tr|F7BW36|F7BW36_MACMU	FCN1	NA	NA	NA	NA	NA	NA	NA	NA	-0.358	0.0169	0.44	-0.261	0.252	-1.09	0.177	0	0.4	-0.65	-0.391
11079	O00625	F6S6S2	tr|F6S6S2|F6S6S2_MACMU	PIR	NA	NA	NA	NA	NA	NA	NA	NA	NA	NA	NA	NA	NA	NA	NA	-0.215	-0.00661	0.00661	0.301
5880	O00629	F7EGK1	tr|F7EGK1|F7EGK1_MACMU	KPNA4	0.288	0.154	-0.0101	0.275	0.162	0.14	-0.00323	-0.252	NA	NA	NA	NA	NA	NA	NA	-0.398	-0.343	-0.259	0.00323
6178	O00748	F6UNJ2	tr|F6UNJ2|F6UNJ2_MACMU	CES2	NA	NA	NA	NA	NA	NA	NA	NA	0	0.113	-0.789	1.96	-0.103	-0.252	0.16	NA	NA	NA	NA
2096	O00754	F7BW43	tr|F7BW43|F7BW43_MACMU	MAN2B1	-0.137	0.0369	0.141	-0.194	-0.191	0.0643	-0.202	0.139	0.154	0.0831	0.194	-0.119	-0.018	-0.047	-0.0742	0.293	0.237	-0.272	0
11507	O00764	F7DLS4	tr|F7DLS4|F7DLS4_MACMU	PDXK	NA	NA	NA	NA	NA	NA	NA	NA	-0.671	0.0838	0.861	-0.143	0.0358	0.0258	0.339	0	-0.601	-0.495	-0.31
7727	O14498	F7GQX1	tr|F7GQX1|F7GQX1_MACMU	ISLR	-0.0199	-0.0117	0.00339	-0.296	-0.0348	-0.272	0.322	0	0.236	-0.0959	-0.138	-0.0659	0.0536	0.237	0.109	0.000762	0.462	-0.0498	0.459
548	O14514	F7GRY4	tr|F7GRY4|F7GRY4_MACMU	ADGRB1	-0.000554	0.159	-0.0844	-0.0587	0	-0.0957	0.135	-0.0659	0.383	-0.485	-0.202	0.377	0.194	0.0911	-0.598	-0.155	0.263	0.574	0.333
5101	O14531	H9H4A5	tr|H9H4A5|H9H4A5_MACMU	DPYSL4	NA	NA	NA	NA	NA	NA	NA	NA	-0.626	0.769	0.519	-0.0872	0.674	0	0.815	0.107	-0.399	-0.168	-0.0252
14564	O14558	F6PQ65	tr|F6PQ65|F6PQ65_MACMU	HSPB6	NA	NA	NA	NA	NA	NA	NA	NA	NA	NA	NA	NA	NA	NA	NA	-0.113	-0.23	0.222	0.113
3971	O14576	F6WW23	tr|F6WW23|F6WW23_MACMU	DYNC1I1	0.368	0.402	0.0505	0.422	0.0878	-0.253	-0.725	-0.535	-0.778	-0.302	0.698	0	0.155	0.0245	-0.241	0.00195	-0.351	-0.3	-0.274
10902	O14579	F7FFE8	tr|F7FFE8|F7FFE8_MACMU	COPE	NA	NA	NA	NA	NA	NA	NA	NA	0.62	-0.203	0.137	-0.345	0.388	0.273	0.00521	-0.317	-0.787	-0.0111	0
938	O14594	F7G512	tr|F7G512|F7G512_MACMU	NCAN	-0.177	0.334	0.236	0	-0.052	0.0457	-0.375	-0.416	0.212	-0.215	0.012	0.231	-0.371	0.17	-0.23	-0.087	0.0728	0.284	-0.152
11858	O14618	F7FL64	tr|F7FL64|F7FL64_MACMU	CCS	NA	NA	NA	NA	NA	NA	NA	NA	NA	NA	NA	NA	NA	NA	NA	0.465	-0.005	-0.835	0.005
2160	O14638	F7GU58	tr|F7GU58|F7GU58_MACMU	ENPP3	-0.307	0.381	-0.135	0.00523	-0.00523	-0.362	0.395	0.927	NA	NA	NA	NA	NA	NA	NA	NA	NA	NA	NA
706	O14647	F7HNG3	tr|F7HNG3|F7HNG3_MACMU	CHD2	-1.06	-0.606	0	-0.526	0.217	0.0942	0.341	0.402	-0.245	-0.765	-0.13	0.209	0.315	0.03	-1.52	NA	NA	NA	NA
13919	O14653	F6ZS33	tr|F6ZS33|F6ZS33_MACMU	GOSR2	NA	NA	NA	NA	NA	NA	NA	NA	0.551	0.0214	0.4	-0.474	0	-0.577	0.334	-0.86	-0.213	0.551	-0.0322
13053	O14668	F7GMP4	tr|F7GMP4|F7GMP4_MACMU	PRRG1	-0.0958	-0.0876	0	-0.149	-0.172	0.243	0.0647	-0.023	0.0651	-0.189	-0.0257	-0.556	0.564	0.399	-0.184	0.533	0.225	0.00695	0.28
2826	O14672	F6V4A7	tr|F6V4A7|F6V4A7_MACMU	ADAM10	-0.000301	-0.353	-0.183	-0.229	-0.226	-0.0365	0.228	0.153	0.0379	-0.118	-0.463	0.293	0.388	0.295	0.0879	-0.028	0.072	0	0.0221
15436	O14737	F6S8R2	tr|F6S8R2|F6S8R2_MACMU	PDCD5	0.41	0.412	0.187	0.187	0.23	-0.239	0.0871	0.0939	-0.332	-0.441	1.2	0	0.329	-0.0262	-0.546	-0.271	-0.255	-0.268	-0.0722
9671	O14745	F6TPX1	tr|F6TPX1|F6TPX1_MACMU	SLC9A3R1	0.235	0.228	0.155	0.122	0.247	-0.108	-0.0422	-0.00488	-0.17	-0.0692	-0.0868	-0.133	0	-0.351	0.121	0.185	0.119	-0.00311	0.242
5082	O14773	F7C288	tr|F7C288|F7C288_MACMU	TPP1	0.278	-0.244	0.142	-0.186	-0.0796	0.319	-0.151	0.233	0.767	-0.0967	0.152	-0.246	0.108	-0.19	-0.0882	0.737	0.436	0	-0.089
1886	O14786	F7HHM6	tr|F7HHM6|F7HHM6_MACMU	NRP1	NA	NA	NA	NA	NA	NA	NA	NA	0.0286	0.142	-0.304	0.146	-0.15	-0.442	0.16	-0.00066	0.483	-0.0226	0
10585	O14792	F7DQN3	tr|F7DQN3|F7DQN3_MACMU	HS3ST1	NA	NA	NA	NA	NA	NA	NA	NA	NA	NA	NA	NA	NA	NA	NA	0.117	-0.117	0.18	-0.754
8587	O14793	A1C2U6	sp|A1C2U6|GDF8_MACMU	MSTN	0.085	-0.161	-0.239	-0.178	-0.0574	0.221	0.14	0	0.227	-0.0639	-0.252	-0.464	-0.0322	0.308	-0.00495	0.0773	0.356	0.609	0.352
15180	O14810	F7ALI1	tr|F7ALI1|F7ALI1_MACMU	CPLX1	0.539	0.507	0.231	0.268	0.115	-0.386	-0.461	-0.665	-0.339	-0.175	0.147	0	0.133	0.199	0.356	-0.176	-0.423	-0.394	-0.597
13478	O14818	F7H5U7	tr|F7H5U7|F7H5U7_MACMU	PSMA7	-0.395	-0.123	0.526	0.14	0.237	0.226	-0.343	0.721	0	0.422	-0.279	-0.0154	-0.0674	0.0021	0.437	0.0512	-0.17	-0.102	-0.0285
9952	O14904	F7HS08	tr|F7HS08|F7HS08_MACMU	WNT9A	NA	NA	NA	NA	NA	NA	NA	NA	0.0317	-0.175	0.0366	-0.056	0	0.00305	-0.658	NA	NA	NA	NA
10529	O14908	F6TQM4	tr|F6TQM4|F6TQM4_MACMU	GIPC1	-0.448	-0.495	0.196	-0.196	0.256	-0.218	0.5	0.501	NA	NA	NA	NA	NA	NA	NA	NA	NA	NA	NA
1151	O14917	F6XGK9	tr|F6XGK9|F6XGK9_MACMU	PCDH17	0.0396	0	-0.0915	-0.134	0.0126	-0.155	-0.0736	-0.21	-0.083	0.0498	-0.0822	-0.136	0.00906	0.0127	0.0251	-0.0132	0.289	0.483	0.224
13305	O14925	F7A164	tr|F7A164|F7A164_MACMU	TIMM23	NA	NA	NA	NA	NA	NA	NA	NA	-0.354	-0.624	0.292	0.413	0.605	-0.03	0	NA	NA	NA	NA
14284	O14950	F6RFU8	tr|F6RFU8|F6RFU8_MACMU	MYL12A	0.0517	0.179	0	0.342	0.15	0.0938	-0.0176	0.275	-0.337	-0.0182	-0.124	-0.529	0.171	0.244	-0.165	-0.364	-0.202	-0.111	0.104
14705	O14960	F6VHJ2	tr|F6VHJ2|F6VHJ2_MACMU	LECT2	NA	NA	NA	NA	NA	NA	NA	NA	NA	NA	NA	NA	NA	NA	NA	0.143	-0.0185	-0.928	0.0185
1722	O14974	F6QPK6	tr|F6QPK6|F6QPK6_MACMU	PPP1R12A	0.83	0.275	0.528	0.454	0.257	-0.0151	0.0718	-0.18	-0.159	-0.255	1	-0.0469	0.249	0	-0.133	0.273	-0.224	-0.0441	-0.244
1415	O14980	F6ZZ03	tr|F6ZZ03|F6ZZ03_MACMU	XPO1	NA	NA	NA	NA	NA	NA	NA	NA	NA	NA	NA	NA	NA	NA	NA	0.134	-0.0134	0.0134	-0.156
714	O15014	F7D3M2	tr|F7D3M2|F7D3M2_MACMU	ZNF609	NA	NA	NA	NA	NA	NA	NA	NA	NA	NA	NA	NA	NA	NA	NA	-0.045	0.417	0.045	-0.051
170	O15020	F6W8M4	tr|F6W8M4|F6W8M4_MACMU	SPTBN2	0.423	0.3	0.0264	0.36	0.158	-0.286	-0.162	-0.346	-0.853	-0.21	0.514	0.889	0.0735	0.198	-0.0776	0	-0.225	-0.328	-0.915
395	O15031	F7E8S5	tr|F7E8S5|F7E8S5_MACMU	PLXNB2	0.0537	-0.163	-0.0637	-0.169	-0.0152	-0.0375	0.0176	0.0226	0.0214	-0.042	-0.0647	0	-0.0347	0.172	-0.0543	0.214	0.155	0.432	0.172
2466	O15033	F7DTA5	tr|F7DTA5|F7DTA5_MACMU	AREL1	NA	NA	NA	NA	NA	NA	NA	NA	NA	NA	NA	NA	NA	NA	NA	-0.0241	-1.58	0.0752	0.0241
3014	O15041	F6VAS8	tr|F6VAS8|F6VAS8_MACMU	SEMA3E	-0.0909	-0.0736	-0.143	-0.137	0.0528	0.235	-0.0268	-0.0442	0.237	0.204	-0.0938	-0.157	0.22	0.26	0	0.531	0.583	-0.000817	0.186
984	O15072	F7DSS6	tr|F7DSS6|F7DSS6_MACMU	ADAMTS3	0.16	0.144	-0.0787	0.13	-0.14	-0.0894	-0.191	-0.0535	-0.112	0	-0.252	0.192	0.0929	0.171	-0.11	-0.0148	0.337	0.721	0.0972
2077	O15083	F7E3M5	tr|F7E3M5|F7E3M5_MACMU	ERC2	NA	NA	NA	NA	NA	NA	NA	NA	-0.526	-0.442	-0.122	0	1.75	0.0109	0.672	NA	NA	NA	NA
3144	O15117	F7GW10	tr|F7GW10|F7GW10_MACMU	FYB	NA	NA	NA	NA	NA	NA	NA	NA	0.114	0.0639	-0.522	0.112	-0.171	-0.14	0	NA	NA	NA	NA
12192	O15120	F7HKS0	tr|F7HKS0|F7HKS0_MACMU	AGPAT2	-1.49	-0.755	0.2	1.01	-0.243	-0.2	0.928	1.27	NA	NA	NA	NA	NA	NA	NA	NA	NA	NA	NA
6211	O15123	F6QXG9	tr|F6QXG9|F6QXG9_MACMU	ANGPT2	-0.6	0.203	0.147	-0.516	-0.676	0.569	-0.308	0.153	-0.1	-0.0765	0.102	-0.269	0.301	0	-0.39	0.0313	0.176	0.291	-0.207
11174	O15126	F7G220	tr|F7G220|F7G220_MACMU	SCAMP1	-0.0593	-0.279	-0.0906	-0.187	0	0.255	-0.047	-0.265	0.0698	0.0871	0.0318	-0.126	0.0371	0.00652	-0.276	0.683	0.213	0.46	-0.366
9258	O15143	F7BKH1	tr|F7BKH1|F7BKH1_MACMU	ARPC1B	-0.276	-0.0149	0.101	0.0374	0.372	0.687	0.139	0.967	-0.236	0.438	-0.485	-0.459	-0.295	0.146	-0.288	-0.471	0.0174	-0.532	0
10977	O15144	F6UWC3	tr|F6UWC3|F6UWC3_MACMU	ARPC2	NA	NA	NA	NA	NA	NA	NA	NA	0.0482	0.435	-0.0634	0.0749	0.0241	0.182	-0.0135	0	-0.0307	-0.0991	-0.192
14053	O15145	F7H998	tr|F7H998|F7H998_MACMU	ARPC3	0.193	0	0.0849	0.213	0.14	0.351	-0.299	0.812	-0.187	0.113	-0.197	0.261	-0.309	0.247	-0.403	-0.54	-0.298	-0.0137	-0.304
1623	O15197	F7GJU4	tr|F7GJU4|F7GJU4_MACMU	EPHB6	0.00313	0.171	-0.341	-0.0537	-0.119	-0.221	-0.211	0.111	0	-0.193	-0.295	0.412	0.0128	0.0702	-0.118	-0.0203	0.12	0.977	0.189
7038	O15204	F7GJP1	tr|F7GJP1|F7GJP1_MACMU	ADAMDEC1	-0.292	-0.31	0.42	-0.188	0.0773	0.214	0.288	0.66	NA	NA	NA	NA	NA	NA	NA	-0.164	-0.216	0.16	-0.0773
8112	O15232	F7GV78	tr|F7GV78|F7GV78_MACMU	MATN3	NA	NA	NA	NA	NA	NA	NA	NA	NA	NA	NA	NA	NA	NA	NA	0.0306	-0.0306	0.828	-0.325
5081	O15240	F6QHR1	tr|F6QHR1|F6QHR1_MACMU	VGF	0.00656	-0.00978	-0.393	-0.464	-0.315	-0.2	0.271	0.406	-0.0623	-0.0738	-0.396	0.118	0	0.185	-0.229	0.345	0.036	0.693	0.192
4809	O15287	F6WT79	tr|F6WT79|F6WT79_MACMU	FANCG	-1.22	-0.599	0.00665	1.32	0.173	0.752	-0.932	-0.159	0.101	-0.351	0.368	-0.634	-0.261	0	0.0188	NA	NA	NA	NA
13227	O15318	F6Y5L0	tr|F6Y5L0|F6Y5L0_MACMU	POLR3G	NA	NA	NA	NA	NA	NA	NA	NA	NA	NA	NA	NA	NA	NA	NA	-1.07	1.57	-0.554	0.554
2053	O15327	F6SGG6	tr|F6SGG6|F6SGG6_MACMU	INPP4B	NA	NA	NA	NA	NA	NA	NA	NA	NA	NA	NA	NA	NA	NA	NA	0.101	0.133	-0.153	-0.101
9376	O15335	F7HBU3	tr|F7HBU3|F7HBU3_MACMU	CHAD	NA	NA	NA	NA	NA	NA	NA	NA	NA	NA	NA	NA	NA	NA	NA	0.097	0.499	-0.134	-0.097
4609	O15354	F7B4P4	tr|F7B4P4|F7B4P4_MACMU	GPR37	0.291	-0.117	-0.177	-0.188	-0.311	0.165	-0.0426	-0.0226	0	-0.229	0.0834	-0.381	0.422	0.229	-0.0216	0.241	0.358	0.567	0.0879
8472	O15382	F6ZG15	tr|F6ZG15|F6ZG15_MACMU	BCAT2	NA	NA	NA	NA	NA	NA	NA	NA	0.375	0.035	-0.0986	-0.0807	-0.0603	0.0958	0	NA	NA	NA	NA
6419	O15389	F7EMT7	tr|F7EMT7|F7EMT7_MACMU	SIGLEC5	-0.645	-0.246	-0.0151	-0.397	-0.164	0.794	0.478	-0.0542	-0.347	0.0428	0	0.17	-0.222	0.19	-0.346	0.44	0.234	0.691	0.171
2644	O15394	F6ZL56	tr|F6ZL56|F6ZL56_MACMU	NCAM2	0	0.325	-0.142	-0.15	0.242	-0.0127	-0.188	-0.432	-0.126	-0.451	0.159	0.109	0.0754	0.858	-0.415	-0.012	0.198	0.784	0.195
12439	O15400	F7ATP9	tr|F7ATP9|F7ATP9_MACMU	STX7	0.156	0	-0.175	-0.29	0.111	-0.154	0.482	0.627	0.153	-0.789	-0.374	0.384	0.379	0.323	-0.718	-0.142	0.203	-0.231	-0.429
7083	O15427	F6R637	tr|F6R637|F6R637_MACMU	SLC16A3	NA	NA	NA	NA	NA	NA	NA	NA	NA	NA	NA	NA	NA	NA	NA	0.133	-0.133	0.163	-0.209
9475	O15466	F7HKN6	tr|F7HKN6|F7HKN6_MACMU	ST8SIA5	0.0431	0.332	-0.341	0	0.128	-0.00504	-0.172	-0.416	-0.0703	-0.0158	-0.346	0.148	-0.18	0.0719	-0.14	0.346	0.332	0.568	0.18
9157	O15482	F7HSV3	tr|F7HSV3|F7HSV3_MACMU	TEX28	NA	NA	NA	NA	NA	NA	NA	NA	-0.15	-0.261	0.0927	0	0.000922	-0.0184	0.00472	NA	NA	NA	NA
13787	O15498	F6PLE2	tr|F6PLE2|F6PLE2_MACMU	YKT6	0.258	0.166	0.127	0	0.138	-0.0566	-0.308	-0.424	0.00167	-0.0548	-0.127	0.147	-0.407	-0.438	0.185	-0.424	0.223	-0.569	0.169
15191	O15540	F6TB55	tr|F6TB55|F6TB55_MACMU	FABP7	-0.224	0.326	0.0967	0.244	-0.0256	-0.0495	-0.0347	0.14	-0.176	0	-0.17	-0.0658	0.247	-0.235	0.0763	0.13	0.0052	-0.582	0.336
2726	O43143	F6YQX3	tr|F6YQX3|F6YQX3_MACMU	DHX15	NA	NA	NA	NA	NA	NA	NA	NA	NA	NA	NA	NA	NA	NA	NA	0.136	-0.453	0.106	-0.106
8625	O43173	F7GIS7	tr|F7GIS7|F7GIS7_MACMU	ST8SIA3	0.0138	0.0248	-0.0884	0.171	-0.216	-0.194	-0.27	0.137	NA	NA	NA	NA	NA	NA	NA	-0.293	0.0163	-0.0138	0.0481
6504	O43236	F6VBY7	tr|F6VBY7|F6VBY7_MACMU	2017-09-04	NA	NA	NA	NA	NA	NA	NA	NA	NA	NA	NA	NA	NA	NA	NA	0.131	-0.56	0.156	-0.131
6935	O43237	F6WNX7	tr|F6WNX7|F6WNX7_MACMU	DYNC1LI2	0.375	0.0983	-0.117	0.327	0.0195	-0.0414	-0.269	-0.25	NA	NA	NA	NA	NA	NA	NA	0.465	-0.0353	-0.00312	0.00312
12497	O43240	F6QBF7	tr|F6QBF7|F6QBF7_MACMU	KLK10	-0.167	-0.146	0.00172	-0.376	-0.0134	0	0.314	0.159	0.025	-0.177	-0.106	0.192	-0.143	-0.28	0.244	0.374	0.106	-0.0287	0.304
5822	O43242	F6UFI7	tr|F6UFI7|F6UFI7_MACMU	PSMD3	-0.187	-0.0144	-0.186	0.0144	-0.104	0.31	0.178	0.278	NA	NA	NA	NA	NA	NA	NA	NA	NA	NA	NA
5522	O43278	F7EVK9	tr|F7EVK9|F7EVK9_MACMU	SPINT1	0.183	-0.0279	-0.0862	-0.222	0.102	0	0.0195	-0.195	-0.26	-0.239	0.253	0.32	0.0942	-0.0094	-0.193	0.246	-0.097	0.128	0.0615
7335	O43280	F7HST2	tr|F7HST2|F7HST2_MACMU	TREH	NA	NA	NA	NA	NA	NA	NA	NA	0.397	-0.322	0.112	0.47	0	0.383	-0.584	0.398	-0.293	-0.37	-0.249
12348	O43291	F6UFK3	tr|F6UFK3|F6UFK3_MACMU	SPINT2	-0.0131	-0.0643	-0.344	0.321	-0.0477	-0.044	0.0781	0.0208	-0.334	-0.0855	0.208	0	-0.152	0.26	0.0275	0.0456	0.0575	0.461	-0.0346
3456	O43299	F6WXU7	tr|F6WXU7|F6WXU7_MACMU	AP5Z1	0.374	-0.371	-0.0797	-0.00923	-0.0558	-0.368	0.202	0	0.104	0.0101	-0.457	0.144	0.0518	0.279	-0.378	-0.26	-0.147	0.166	0.0577
5684	O43300	F7DN23	tr|F7DN23|F7DN23_MACMU	LRRTM2	NA	NA	NA	NA	NA	NA	NA	NA	NA	NA	NA	NA	NA	NA	NA	-0.294	0.278	0.143	-0.143
3956	O43301	F7GLU5	tr|F7GLU5|F7GLU5_MACMU	HSPA12A	1.38	1.16	0.0796	0.931	0.323	-0.445	-1.03	-0.887	0.63	-0.478	-0.348	0.577	0.337	0	-0.29	-0.455	-0.781	-0.378	0.0757
6030	O43307	F7GHA1	tr|F7GHA1|F7GHA1_MACMU	ARHGEF9	NA	NA	NA	NA	NA	NA	NA	NA	NA	NA	NA	NA	NA	NA	NA	0.292	-0.292	0.325	-1.11
4516	O43309	F7HGS0	tr|F7HGS0|F7HGS0_MACMU		NA	NA	NA	NA	NA	NA	NA	NA	0.646	0.0391	0	0.139	-0.5	-0.548	-0.206	NA	NA	NA	NA
11595	O43315	F6WY03	tr|F6WY03|F6WY03_MACMU	AQP9	NA	NA	NA	NA	NA	NA	NA	NA	0.492	0	-0.195	-0.227	0.412	-0.11	0.304	NA	NA	NA	NA
4000	O43390	F7GDH1	tr|F7GDH1|F7GDH1_MACMU	HNRNPR	NA	NA	NA	NA	NA	NA	NA	NA	0	0.148	0.0354	-0.224	0.0569	0.0288	-0.248	0.0629	-0.928	-1.04	-0.805
11179	O43396	F6S0P0	tr|F6S0P0|F6S0P0_MACMU	TXNL1	0.803	1.02	0.171	0.725	0.109	-0.154	-0.56	-0.896	-0.56	-0.103	0.72	-0.288	0.269	0.107	0.0297	0	-0.0534	-0.357	-0.201
5379	O43405	F7C5Y0	tr|F7C5Y0|F7C5Y0_MACMU	COCH	0.202	0.0704	-1.08	-0.229	-0.624	0.389	-0.386	0.698	0.00548	0.322	-0.00766	-0.421	-0.0771	0.324	-0.563	-0.333	0.00714	0.883	0
680	O43426	F7DSU6	tr|F7DSU6|F7DSU6_MACMU	SYNJ1	0.494	0.272	0.304	0	0.197	-0.743	-0.28	-0.449	1.13	0.805	0.403	-0.787	-0.356	-0.882	-0.291	NA	NA	NA	NA
7347	O43464	F6UNT9	tr|F6UNT9|F6UNT9_MACMU	HTRA2	0	-0.0637	-0.131	-0.17	0.0514	-0.268	0.418	-0.113	0.0563	0.186	-0.375	0.115	0.0169	-0.128	0.226	0.0872	-0.349	0.181	-0.0727
8778	O43493	F6R9H5	tr|F6R9H5|F6R9H5_MACMU	TGOLN2	-0.0121	-0.0647	-0.147	-0.0934	-0.0298	-0.151	0.106	-0.0274	0.0223	-0.368	0.00858	0.0499	0	0.132	-0.291	0.205	0.362	0.651	0.0582
7907	O43505	F6XMM3	tr|F6XMM3|F6XMM3_MACMU	B4GAT1	0.26	0.0717	-0.272	-0.137	0	-0.179	-0.177	-0.338	0.338	-0.128	-0.282	0.132	-0.0145	0.527	-0.501	0.171	0.138	0.562	0.0495
5645	O43516	F7ACT1	tr|F7ACT1|F7ACT1_MACMU	WIPF1	NA	NA	NA	NA	NA	NA	NA	NA	-0.169	0	0.268	-0.0114	-0.022	-0.189	-0.201	0.504	0.418	0.732	0.646
9082	O43529	F7FA34	tr|F7FA34|F7FA34_MACMU	CHST10	-0.211	0.00429	-0.213	-0.0138	-0.0217	0	0.0309	0.358	0.27	-0.063	0.122	-0.0299	-0.161	0.191	0.106	-0.222	0.26	-0.0469	0.159
7184	O43556	F7G2E1	tr|F7G2E1|F7G2E1_MACMU	SGCE	-0.0157	-0.124	-0.189	0.0493	0	-0.0398	0.0376	-0.341	0.286	-0.176	-0.0127	-0.31	0.00759	0.408	-0.0744	0.0241	0.418	0.521	0.36
9538	O43567	F7EGQ3	tr|F7EGQ3|F7EGQ3_MACMU	RNF13	-0.188	-0.0068	0	0.0909	-0.207	0.0736	-0.0759	-0.287	-0.046	-0.221	0.154	-0.588	-0.0162	0.331	0.142	0.0859	0.245	0.101	0.00562
14554	O43583	F7GK79	tr|F7GK79|F7GK79_MACMU	DENR	NA	NA	NA	NA	NA	NA	NA	NA	NA	NA	NA	NA	NA	NA	NA	0.0429	-0.422	-0.0429	0.336
10798	O43610	F7G6M6	tr|F7G6M6|F7G6M6_MACMU	SPRY3	0.188	-0.086	0.269	-0.402	0.086	-0.398	0.311	-1.94	NA	NA	NA	NA	NA	NA	NA	NA	NA	NA	NA
15292	O43612	F7GWM3	tr|F7GWM3|F7GWM3_MACMU	HCRT	-0.133	-0.23	-0.285	-0.378	-0.359	0.445	-0.617	-0.141	0.0218	0	0.0122	-0.672	0.00243	0.903	-0.825	0.101	0.193	0.538	0.198
13400	O43633	F7HNZ9	tr|F7HNZ9|F7HNZ9_MACMU	CHMP2A	NA	NA	NA	NA	NA	NA	NA	NA	NA	NA	NA	NA	NA	NA	NA	-0.0534	-0.36	0.0534	0.211
6093	O43670	F7BQH6	tr|F7BQH6|F7BQH6_MACMU	ZNF207	NA	NA	NA	NA	NA	NA	NA	NA	NA	NA	NA	NA	NA	NA	NA	0.251	0.0462	-0.338	-0.0462
11363	O43681	F7H2U4	tr|F7H2U4|F7H2U4_MACMU	ASNA1	NA	NA	NA	NA	NA	NA	NA	NA	NA	NA	NA	NA	NA	NA	NA	-0.0658	-0.341	0.0658	0.135
11700	O43692	F7GZU6	tr|F7GZU6|F7GZU6_MACMU	PI15	0.138	-0.219	0.0897	0.00101	-0.0335	0	0.0786	0.035	0.16	-0.245	-0.0119	-0.157	-0.24	-0.172	0.107	-0.373	0.47	-0.323	0.326
2044	O43707	F7HU82	tr|F7HU82|F7HU82_MACMU	ACTN4	-0.186	0.0623	0.0824	0.421	0.0378	-0.127	-0.103	0.871	0	0.164	0.0753	-0.126	0.0511	-0.093	-0.00368	-0.125	-0.158	-0.512	0.262
13535	O43708	F6PW84	tr|F6PW84|F6PW84_MACMU	GSTZ1	NA	NA	NA	NA	NA	NA	NA	NA	NA	NA	NA	NA	NA	NA	NA	0.0477	0.202	-0.0477	-0.112
12041	O43736	F7ETL1	tr|F7ETL1|F7ETL1_MACMU	ITM2A	0.286	-0.0503	-0.0881	0.000565	0.252	0.303	0.251	-0.196	NA	NA	NA	NA	NA	NA	NA	0.0102	-0.0888	-0.000565	-0.0531
3162	O43747	F7FWK5	tr|F7FWK5|F7FWK5_MACMU	AP1G1	NA	NA	NA	NA	NA	NA	NA	NA	0.276	-0.161	-0.252	-0.114	-0.608	-0.501	0.284	0.388	0.15	0.323	0
15856	O43768	F6PXF4	tr|F6PXF4|F6PXF4_MACMU	ENSA	0.988	1.05	0.251	0.929	0.457	0	-0.755	-1.26	-1.04	-0.727	0.535	0.259	0.656	0.328	-0.273	-0.546	-0.526	-0.613	-0.509
7933	O43813	F7B2A9	tr|F7B2A9|F7B2A9_MACMU	LANCL1	1.08	0.442	0.399	1.37	-0.262	-0.175	-0.556	-0.586	NA	NA	NA	NA	NA	NA	NA	0.334	-0.228	0.0666	-0.0666
9514	O43827	F7HQR6	tr|F7HQR6|F7HQR6_MACMU	ANGPTL7	-0.15	0.1	-0.0129	-0.666	-0.11	-0.266	0.228	0.0129	NA	NA	NA	NA	NA	NA	NA	1.16	-1.12	0.643	0.215
10144	O43852	F6ZZ64	tr|F6ZZ64|F6ZZ64_MACMU	CALU	NA	NA	NA	NA	NA	NA	NA	NA	0.0786	0.0481	0.182	-0.318	-0.189	-0.354	0	NA	NA	NA	NA
5589	O43865	F7GIN0	tr|F7GIN0|F7GIN0_MACMU	AHCYL1	0.0297	0.45	0.43	0.663	0.366	-0.327	-0.313	0.193	-0.504	0.321	0.516	-0.0987	-0.211	-0.268	-0.148	0	-0.522	0.225	-0.216
9741	O43866	F7FUB7	tr|F7FUB7|F7FUB7_MACMU	CD5L	-0.526	-0.474	0.591	0.0732	-0.155	-0.275	0.54	0.763	0.0591	0.0724	0.632	-0.182	-0.0631	-0.398	-0.288	0.227	0.192	-0.931	0
9109	O43889	F7GSV7	tr|F7GSV7|F7GSV7_MACMU	CREB3	-0.0279	0.0279	0.227	0.0388	-0.0627	0.255	-0.105	-0.0377	NA	NA	NA	NA	NA	NA	NA	NA	NA	NA	NA
4199	O43900	F6VGC9	tr|F6VGC9|F6VGC9_MACMU	PRICKLE3	NA	NA	NA	NA	NA	NA	NA	NA	NA	NA	NA	NA	NA	NA	NA	-0.0919	0.621	-0.369	0.0919
7956	O43916	F6TF94	tr|F6TF94|F6TF94_MACMU	CHST1	0.274	0.397	0	0.0506	-0.0404	-0.189	-0.207	-0.315	0.143	-0.229	-0.0177	0.0694	0.0401	0.178	-0.183	-0.351	0.0533	0.317	-0.0942
10557	O60218	F6ZUT0	tr|F6ZUT0|F6ZUT0_MACMU	AKR1B10	0.174	0.989	-0.226	0.35	-0.23	-0.225	-0.288	-0.454	0.208	0.495	-0.154	0.307	-0.727	0.0463	0	-0.0214	0.00696	-0.33	0.00391
15777	O60220	F7BGN5	tr|F7BGN5|F7BGN5_MACMU	TIMM8A	NA	NA	NA	NA	NA	NA	NA	NA	NA	NA	NA	NA	NA	NA	NA	1.49	-0.247	0.247	-0.871
15317	O60234	F6RMY6	tr|F6RMY6|F6RMY6_MACMU	GMFG	0.0995	-0.0368	0.157	0	0.232	0.458	0.076	0.254	-0.295	-0.104	0.172	-0.363	0.0206	0.105	-0.277	-0.39	-0.278	-0.385	-0.313
751	O60241	F7FAA5	tr|F7FAA5|F7FAA5_MACMU	ADGRB2	0.353	0.234	-0.274	0.125	-0.0486	-0.0945	-0.0509	-0.256	-0.00526	0.0714	-0.163	0.291	0.213	0.423	-0.131	-0.158	0.159	0.876	0
8042	O60243	F7DV61	tr|F7DV61|F7DV61_MACMU	HS6ST1	-0.0232	0.0827	0.00972	-0.154	-0.566	-0.0842	0.206	0	0.455	0.402	-0.288	-0.481	-1.41	-0.394	-0.56	0.316	0.27	0.307	0.263
1787	O60245	F7HN04	tr|F7HN04|F7HN04_MACMU	PCDH7	0.064	0.0712	-0.193	-0.226	-0.108	0.00171	0.209	0.0346	0.252	-0.0511	0	0.178	-0.163	-0.0495	-0.411	-0.0493	0.127	0.239	-0.107
16184	O60262	F7BB02	tr|F7BB02|F7BB02_MACMU	GNG7	0.168	-0.165	0.214	-0.126	0.186	0.146	-0.411	-0.466	-0.806	-0.358	0	0.416	0.128	-0.139	0.43	NA	NA	NA	NA
1079	O60271	F6YGG7	tr|F6YGG7|F6YGG7_MACMU	SPAG9	NA	NA	NA	NA	NA	NA	NA	NA	NA	NA	NA	NA	NA	NA	NA	-0.0553	0.811	-0.0595	0.0553
4611	O60279	F7AR46	tr|F7AR46|F7AR46_MACMU	SUSD5	0.149	0.207	-0.196	-0.0605	0.1	0.0283	-0.165	-0.24	-0.0384	-0.42	-0.286	0.239	0	0.367	-0.301	0.143	0.216	0.845	-0.0155
4590	O60347	F7GRJ6	tr|F7GRJ6|F7GRJ6_MACMU	TBC1D12	-0.818	-0.126	-0.00726	-0.148	-0.0233	0.167	0.155	0.187	0.0133	-0.165	-0.0312	0	-0.421	-0.518	0.0717	0.185	0.284	0.5	0.437
389	O60449	F6PSN6	tr|F6PSN6|F6PSN6_MACMU	LY75	-0.1	0.667	0.443	-0.14	0.237	-0.34	-0.404	-0.0805	-0.245	0.116	0.373	-0.202	-0.0733	-0.124	0.409	0.573	0.719	0.18	0
1828	O60462	F7G9W5	tr|F7G9W5|F7G9W5_MACMU	NRP2	-0.132	-0.144	-0.168	0.317	-0.179	-0.0856	0.0998	0.245	-0.0489	-0.135	0	0.00446	0.129	0.213	-0.204	-0.0279	0.121	0.497	0.104
4006	O60476	F7F0Q3	tr|F7F0Q3|F7F0Q3_MACMU	MAN1A2	NA	NA	NA	NA	NA	NA	NA	NA	0.0469	-0.082	-0.394	-0.0313	-0.122	-0.315	0.199	0.343	0.101	0.13	0
531	O60486	F7E0G3	tr|F7E0G3|F7E0G3_MACMU	PLXNC1	NA	NA	NA	NA	NA	NA	NA	NA	-1.81	-0.376	-0.473	0.0945	0	0.0155	0.331	NA	NA	NA	NA
14499	O60493	F6W8H1	tr|F6W8H1|F6W8H1_MACMU	SNX3	0	0.22	0.187	0.225	-0.0564	0.856	-0.0471	0.122	-0.0863	-0.297	-0.532	0.12	1.34	0.192	0.652	-0.11	-0.521	-0.68	-0.0598
4340	O60502	F6QIP2	tr|F6QIP2|F6QIP2_MACMU	MGEA5	-0.925	-0.0769	-0.216	-0.127	0.0769	0.786	0.488	0.493	NA	NA	NA	NA	NA	NA	NA	NA	NA	NA	NA
9685	O60513	F7HPG1	tr|F7HPG1|F7HPG1_MACMU	B4GALT4	NA	NA	NA	NA	NA	NA	NA	NA	NA	NA	NA	NA	NA	NA	NA	0.147	-0.216	0.234	-0.147
8830	O60547	F6W0W9	tr|F6W0W9|F6W0W9_MACMU	GMDS	NA	NA	NA	NA	NA	NA	NA	NA	NA	NA	NA	NA	NA	NA	NA	0.0791	-0.254	-0.0791	0.442
3570	O60568	F7E119	tr|F7E119|F7E119_MACMU	PLOD3	0.167	-0.0739	0.0628	-0.276	-0.169	0.0437	-0.189	-0.362	0.0766	0	-0.0394	-0.114	0.0724	-0.27	-0.138	0.256	0.296	0.0141	0.0792
3085	O60603	B3Y618	sp|B3Y618|TLR2_MACMU	TLR2	NA	NA	NA	NA	NA	NA	NA	NA	NA	NA	NA	NA	NA	NA	NA	-0.0775	0.0775	-0.0905	0.122
8160	O60609	F6Z669	tr|F6Z669|F6Z669_MACMU	GFRA3	NA	NA	NA	NA	NA	NA	NA	NA	NA	NA	NA	NA	NA	NA	NA	0.0877	-0.0133	0.0133	-0.133
1282	O60610	F6V4Y9	tr|F6V4Y9|F6V4Y9_MACMU	DIAPH1	NA	NA	NA	NA	NA	NA	NA	NA	-0.117	0	-0.0406	-0.0121	0.718	0.686	1.13	NA	NA	NA	NA
16075	O60613	F6W591	tr|F6W591|F6W591_MACMU	SELENOF	NA	NA	NA	NA	NA	NA	NA	NA	0.06	0.0377	-0.517	-0.362	0.199	-0.041	-0.217	0.0409	0.401	-0.294	0
12177	O60637	F6QHJ8	tr|F6QHJ8|F6QHJ8_MACMU	TSPAN3	NA	NA	NA	NA	NA	NA	NA	NA	NA	NA	NA	NA	NA	NA	NA	0.0391	-0.109	0.0728	-0.0391
8855	O60664	F6YNG4	tr|F6YNG4|F6YNG4_MACMU	PLIN3	NA	NA	NA	NA	NA	NA	NA	NA	-0.12	0	-0.28	-0.214	0.114	0.4	0.281	-0.682	0.267	-0.69	0.111
6191	O60749	F7CPF6	tr|F7CPF6|F7CPF6_MACMU	SNX2	0.247	0.141	-0.0352	0.406	0	0.0242	0.0538	-0.159	-0.0672	0.131	-0.217	-0.149	0.175	0.291	-0.00989	-0.998	0.253	-0.501	-0.189
2019	O60763	F7EIK3	tr|F7EIK3|F7EIK3_MACMU	USO1	NA	NA	NA	NA	NA	NA	NA	NA	NA	NA	NA	NA	NA	NA	NA	0.284	0.987	-0.284	-0.763
6614	O60784	F7AB60	tr|F7AB60|F7AB60_MACMU	TOM1	0.519	0.324	-0.114	0.213	0.0857	0.14	-0.439	-0.546	-0.718	-0.413	0.224	0.208	0.225	0.04	0	-0.125	-0.268	-0.245	-0.249
1093	O60841	F6YEC2	tr|F6YEC2|F6YEC2_MACMU	EIF5B	0.267	-0.285	0.135	-0.639	0.311	-0.26	0.957	-0.315	0.423	0	0.194	0.817	-0.457	-0.55	0.368	-0.618	0.0187	-0.852	-0.53
14887	O60869	F7DDP0	tr|F7DDP0|F7DDP0_MACMU	EDF1	0.381	0.171	0	0.249	0.0835	0.0576	-0.146	-0.254	-0.508	0.181	0.134	-0.247	0.539	-0.0455	0.217	-1.1	-0.897	-0.139	-0.463
6450	O60883	F6TEF3	tr|F6TEF3|F6TEF3_MACMU	GPR37L1	-0.44	-0.291	0.135	0.313	-0.328	-0.29	0.206	0.115	-0.127	-0.252	-0.565	0.151	0.319	0.13	-0.0322	0	0.142	0.131	-0.0396
10048	O60911	F6U683	tr|F6U683|F6U683_MACMU	CTSV	-0.347	-0.27	-0.274	-0.145	-0.176	-0.271	1.44	-0.408	0.493	0	0.766	-0.203	0.595	0.119	-0.47	0.767	0.41	0.542	0.162
15503	O60925	F7FK57	tr|F7FK57|F7FK57_MACMU	PFDN1	NA	NA	NA	NA	NA	NA	NA	NA	NA	NA	NA	NA	NA	NA	NA	0.827	-0.423	0.0319	-0.0319
13590	O60936	F6UJ43	tr|F6UJ43|F6UJ43_MACMU	NOL3	NA	NA	NA	NA	NA	NA	NA	NA	NA	NA	NA	NA	NA	NA	NA	-0.19	-1.27	0.394	0.19
9412	O60938	F7EGW3	tr|F7EGW3|F7EGW3_MACMU	KERA	NA	NA	NA	NA	NA	NA	NA	NA	-0.13	0.273	-0.713	-0.0365	0	-0.111	0.0293	0.432	0.382	-9.73e-07	0.72
1473	O75044	F6Z6L0	tr|F6Z6L0|F6Z6L0_MACMU	SRGAP2	NA	NA	NA	NA	NA	NA	NA	NA	NA	NA	NA	NA	NA	NA	NA	-1.38	-0.31	0.31	0.46
304	O75051	F6RXZ3	tr|F6RXZ3|F6RXZ3_MACMU	PLXNA2	-0.0339	0.176	-0.222	-0.115	0.227	0.058	0.0339	-0.157	NA	NA	NA	NA	NA	NA	NA	NA	NA	NA	NA
1119	O75054	F7HE18	tr|F7HE18|F7HE18_MACMU	IGSF3	NA	NA	NA	NA	NA	NA	NA	NA	-0.656	-0.346	0.254	0.833	0.0598	0	-0.0519	NA	NA	NA	NA
8055	O75056	F6Z7J1	tr|F6Z7J1|F6Z7J1_MACMU	SDC3	0	0.207	-0.433	0.023	-0.208	0.0811	-0.286	-0.0705	0.136	-0.0227	-0.576	0.453	0.0282	0.175	-0.239	-0.0258	0.18	0.335	-0.0617
8058	O75063	F7H529	tr|F7H529|F7H529_MACMU	FAM20B	-0.0926	-0.391	-0.252	-0.245	-0.0536	0.0893	0	-0.0137	0.0516	-0.309	0.149	-0.489	-0.181	0.226	0.598	0.118	0.529	0.112	0.535
6861	O75071	F7AV87	tr|F7AV87|F7AV87_MACMU	EFCAB14	-0.0667	-0.463	-0.136	0.0826	-0.139	-0.0601	0	0.113	0.213	-0.0727	0.0869	-0.166	-0.208	0.0182	0.352	-0.015	0.203	0.34	0.216
2871	O75078	F7G5P9	tr|F7G5P9|F7G5P9_MACMU	ADAM11	NA	NA	NA	NA	NA	NA	NA	NA	NA	NA	NA	NA	NA	NA	NA	0.154	0.469	-0.315	-0.154
4581	O75083	F6QX90	tr|F6QX90|F6QX90_MACMU	WDR1	0.362	0.406	0.0616	0.332	-0.119	-0.189	-0.269	0.234	-0.133	0.172	0.0718	-0.19	-0.0608	0	0.266	0.0737	-0.152	-0.152	-0.107
4731	O75084	F6X7X4	tr|F6X7X4|F6X7X4_MACMU	FZD7	NA	NA	NA	NA	NA	NA	NA	NA	-0.148	0.856	-0.734	0.206	0	-0.0635	0.484	NA	NA	NA	NA
540	O75093	F7CX22	tr|F7CX22|F7CX22_MACMU	SLIT1	0.121	-0.421	-0.284	-0.104	-0.06	-0.113	-0.291	0.0935	-0.244	-0.126	0	0.233	0.02	0.592	-0.619	0.572	0.152	0.801	0.159
466	O75095	F7HHF2	tr|F7HHF2|F7HHF2_MACMU	MEGF6	-0.368	-0.421	-0.39	-0.491	0.0103	0.738	0.269	0.0887	-0.0656	-0.555	-0.423	-0.202	0	0.0601	0.0537	0.441	0.82	0.0867	-0.00236
261	O75096	F6ZUP6	tr|F6ZUP6|F6ZUP6_MACMU	LRP4	-0.466	-0.0408	-0.664	-0.0252	-0.00571	1.19	0.242	0.0782	NA	NA	NA	NA	NA	NA	NA	0.137	0.00571	0.355	-0.0613
2950	O75106	F7GP69	tr|F7GP69|F7GP69_MACMU	AOC2	-0.0898	-0.442	0.0056	-0.113	0	-1.31	0.55	0.199	0.281	0.0486	-0.673	0.401	-0.226	-0.0257	0.00433	NA	NA	NA	NA
777	O75116	F6VT97	tr|F6VT97|F6VT97_MACMU	ROCK2	-0.0894	0.0274	-0.226	0.0673	-0.0274	0.91	-0.186	0.185	NA	NA	NA	NA	NA	NA	NA	NA	NA	NA	NA
3985	O75127	F7DP81	tr|F7DP81|F7DP81_MACMU	PTCD1	NA	NA	NA	NA	NA	NA	NA	NA	0.402	0.127	0.114	-0.049	0	-0.114	-0.202	NA	NA	NA	NA
5488	O75131	F7HIT5	tr|F7HIT5|F7HIT5_MACMU	CPNE3	NA	NA	NA	NA	NA	NA	NA	NA	0.0619	0.0659	-0.215	-0.241	-0.169	0.097	0	NA	NA	NA	NA
1160	O75132	F6ZB42	tr|F6ZB42|F6ZB42_MACMU	ZBED4	-0.557	-0.114	0.062	-0.062	0.121	-0.0714	0.545	0.165	NA	NA	NA	NA	NA	NA	NA	NA	NA	NA	NA
11769	O75144	F7BC56	tr|F7BC56|F7BC56_MACMU	ICOSLG	0	0.0446	-0.00529	-0.304	-0.276	-0.0176	-0.0778	0.069	-0.572	-0.00161	0.386	0.0916	0.23	0.285	-0.00106	-0.0697	0.0545	0.212	0.0451
2941	O75173	F7FBV4	tr|F7FBV4|F7FBV4_MACMU	ADAMTS4	-0.757	-0.828	-0.0275	-0.678	-0.572	-0.298	0.172	0.642	NA	NA	NA	NA	NA	NA	NA	0.452	0.164	0.779	0.0275
10235	O75190	F7EJQ3	tr|F7EJQ3|F7EJQ3_MACMU	DNAJB6	0.448	0.454	-0.0407	-0.0142	0.0228	0.0142	-0.27	-0.341	NA	NA	NA	NA	NA	NA	NA	NA	NA	NA	NA
13907	O75223	F7E821	tr|F7E821|F7E821_MACMU	GGCT	0.333	0.717	0.183	0.386	0.28	-0.0673	-0.338	-0.491	-0.704	-0.449	0.604	0.244	0.403	0.249	0	-0.213	-0.315	-0.184	-0.21
3718	O75326	F7EMJ2	tr|F7EMJ2|F7EMJ2_MACMU	SEMA7A	0.0452	0	-0.0904	-0.423	0.015	-0.036	-0.0856	-0.219	0.388	-0.18	0.0554	-0.165	-0.0715	0.378	-0.178	0.266	0.494	0.29	0.217
1082	O75339	F6YJ87	tr|F6YJ87|F6YJ87_MACMU	CILP	-0.782	-0.751	0.541	0.17	-0.105	0.705	-0.586	0.105	NA	NA	NA	NA	NA	NA	NA	NA	NA	NA	NA
15770	O75347	F7H4T4	tr|F7H4T4|F7H4T4_MACMU	TBCA	0.2	0.459	0.104	0.27	0.0229	0.109	-0.154	-0.174	-0.583	-0.27	0.682	-0.202	0.213	0.0353	-0.161	0	-0.349	-0.343	-0.799
15553	O75348	F7CJH2	tr|F7CJH2|F7CJH2_MACMU	ATP6V1G1	NA	NA	NA	NA	NA	NA	NA	NA	NA	NA	NA	NA	NA	NA	NA	0.43	-0.044	-0.123	0.044
6896	O75354	F6RV29	tr|F6RV29|F6RV29_MACMU	ENTPD6	NA	NA	NA	NA	NA	NA	NA	NA	NA	NA	NA	NA	NA	NA	NA	-0.125	0.128	0.125	-0.374
2817	O75366	F7GJN7	tr|F7GJN7|F7GJN7_MACMU	AVIL	-0.439	-0.0982	0.0906	-0.613	0.135	-0.0208	0.613	0.615	0.472	-0.0764	0	0.12	-0.524	-0.473	0.544	NA	NA	NA	NA
15727	O75368	F7G304	tr|F7G304|F7G304_MACMU	SH3BGRL	0.625	0.674	0.388	0.489	0.179	0.697	-0.0364	-0.0771	-0.224	-0.124	0.606	0.193	0.299	0	-0.00842	-0.131	-0.187	-0.166	-0.139
15466	O75380	H9H2Z9	tr|H9H2Z9|H9H2Z9_MACMU	NDUFS6	0.174	0.166	0.0477	-0.0789	-0.434	-0.468	0.34	-0.0477	NA	NA	NA	NA	NA	NA	NA	NA	NA	NA	NA
6903	O75390	F7HGU4	tr|F7HGU4|F7HGU4_MACMU	CS	-0.384	-0.337	0	0.189	0.116	0.347	0.163	0.407	-0.172	-0.0654	0.328	0.127	-0.116	-0.37	-0.0682	0.439	-0.182	0.0636	-0.142
1812	O75448	F7H1Q1	tr|F7H1Q1|F7H1Q1_MACMU	MED24	0.209	0.0193	-0.311	0.031	-0.0193	-0.0449	0.0825	-0.163	NA	NA	NA	NA	NA	NA	NA	NA	NA	NA	NA
8364	O75462	F7HLW0	tr|F7HLW0|F7HLW0_MACMU	CRLF1	NA	NA	NA	NA	NA	NA	NA	NA	NA	NA	NA	NA	NA	NA	NA	-0.309	0.0585	0.707	-0.0585
5209	O75487	F7EBS1	tr|F7EBS1|F7EBS1_MACMU	GPC4	NA	NA	NA	NA	NA	NA	NA	NA	-0.122	-0.405	-0.00436	0	0.377	0.301	-0.146	0.383	0.291	0.381	-0.034
10088	O75493	F6XJ15	tr|F6XJ15|F6XJ15_MACMU	CA11	0.0734	-0.172	-0.0784	-0.261	0	-0.12	-0.0523	-0.0993	0.347	0.157	-0.316	0.224	0.0238	0.226	-0.0937	0.174	0.191	0.183	-0.0795
9201	O75503	F7E6R3	tr|F7E6R3|F7E6R3_MACMU	CLN5	0.264	-0.239	-0.232	-0.281	-0.227	0.313	-0.395	0	-0.948	-1.28	0.132	0.491	0.242	-0.142	0.235	0.474	0.475	-0.137	0.136
4343	O75509	F7HMX4	tr|F7HMX4|F7HMX4_MACMU	TNFRSF21	-0.0331	-0.17	0	0.0907	0.0587	-0.203	0.0865	-0.00105	0.19	-0.0904	-0.0604	0.118	-0.235	0.0488	-0.0234	0.202	0.25	0.756	-0.0534
15857	O75531	F6T830	tr|F6T830|F6T830_MACMU	BANF1	0.14	0.377	0.0889	0.33	-0.0406	0.566	-0.518	-0.228	-0.052	0.121	0.000645	0.145	0	-0.358	0.405	-0.268	-0.168	-0.348	-0.1
838	O75533	F6X4D3	tr|F6X4D3|F6X4D3_MACMU	SF3B1	NA	NA	NA	NA	NA	NA	NA	NA	NA	NA	NA	NA	NA	NA	NA	-0.145	0.015	-0.015	0.0508
12438	O75586	F6W0V8	tr|F6W0V8|F6W0V8_MACMU	MED6	-1.33	-0.0365	-0.0785	0.398	0.0365	0.237	-0.885	0.9	NA	NA	NA	NA	NA	NA	NA	NA	NA	NA	NA
14275	O75594	H9H398	tr|H9H398|H9H398_MACMU	PGLYRP1	-1.04	-1.83	1.07	-0.769	0.623	1.61	0.0745	2.32	1.03	1.01	-0.145	-0.295	-1.36	0.158	0	-0.146	-0.272	-0.00783	0.769
12782	O75608	F6Z819	tr|F6Z819|F6Z819_MACMU	LYPLA1	NA	NA	NA	NA	NA	NA	NA	NA	0.189	-0.181	0	0.499	-0.0149	0.33	-0.109	NA	NA	NA	NA
13165	O75629	F7HE16	tr|F7HE16|F7HE16_MACMU	CREG1	-0.434	-0.698	-0.163	-0.328	-0.00487	0.818	0.228	0.219	0	0.21	-0.305	-0.0157	0.147	0.206	0.386	-0.0059	0.1	-0.075	0.098
13487	O75631	F6TBY3	tr|F6TBY3|F6TBY3_MACMU	UPK3A	NA	NA	NA	NA	NA	NA	NA	NA	-2.16	-0.036	0.0055	0.593	0.0037	-0.802	0	NA	NA	NA	NA
12004	O75636	F7HFD3	tr|F7HFD3|F7HFD3_MACMU	FCN3	-0.69	-0.318	-0.167	0.644	-0.307	0	-0.0292	0.544	0.455	-1.54	-0.0811	0.655	0.13	0.374	-0.426	0.374	-0.331	0.137	0.133
231	O75643	F7FKG4	tr|F7FKG4|F7FKG4_MACMU	SNRNP200	NA	NA	NA	NA	NA	NA	NA	NA	-0.0536	0.622	-0.964	0.168	0.447	-0.53	0	NA	NA	NA	NA
9984	O75683	F6ZIP0	tr|F6ZIP0|F6ZIP0_MACMU	SURF6	NA	NA	NA	NA	NA	NA	NA	NA	NA	NA	NA	NA	NA	NA	NA	0.0325	-0.0325	0.909	-0.348
6578	O75688	F6XPC8	tr|F6XPC8|F6XPC8_MACMU	PPM1B	-0.0532	0.00315	0.199	0.315	0.242	-0.00315	0.173	0.0298	NA	NA	NA	NA	NA	NA	NA	-0.152	-0.176	-0.24	-0.0441
15751	O75711	F6PPY8	tr|F6PPY8|F6PPY8_MACMU	SCRG1	0.157	-0.61	-0.447	-0.508	-0.46	-0.378	-0.0196	0.0747	0.338	0.0224	-0.673	-0.401	0.108	0.463	-0.0969	0	0.164	0.132	0.425
12917	O75715	F6Q074	tr|F6Q074|F6Q074_MACMU	GPX5	0.0556	-0.0575	-0.242	0.22	-0.306	0	0.256	0.104	0.333	0.0981	-0.0642	0.00728	-0.197	-0.209	-0.00388	-0.0186	0.405	0.519	-0.104
1468	O75717	F6YVJ8	tr|F6YVJ8|F6YVJ8_MACMU	WDHD1	-0.000767	-0.333	0.000767	-0.139	0.149	-0.202	0.287	0.578	NA	NA	NA	NA	NA	NA	NA	NA	NA	NA	NA
9750	O75752	F6UCJ0	tr|F6UCJ0|F6UCJ0_MACMU	B3GALNT1	0.0197	-0.00819	-0.17	0.0361	-0.0155	0.0616	-0.0963	0.0666	0.126	0	-0.16	-0.0387	0.126	-0.0322	-0.268	0.283	0.027	0.477	-0.0814
1336	O75762	F7FYD9	tr|F7FYD9|F7FYD9_MACMU	TRPA1	NA	NA	NA	NA	NA	NA	NA	NA	NA	NA	NA	NA	NA	NA	NA	0.385	-0.298	0.0311	-0.0311
11168	O75781	F6WMF8	tr|F6WMF8|F6WMF8_MACMU	PALM	0.14	0.205	0.222	0.24	0.278	-0.847	-0.895	-0.514	-1.14	-0.908	0.548	1.13	-0.0438	-0.102	-0.915	0.0547	0	0.197	-0.394
11856	O75828	F6R9X5	tr|F6R9X5|F6R9X5_MACMU	CBR3	-0.0674	0.297	-0.0266	-0.0277	0.0224	0.857	-0.356	0.167	-0.103	-0.158	-0.0654	-0.0847	1.13	0.137	0.355	-0.0687	0.366	0	0.156
11424	O75829	F7FYW5	tr|F7FYW5|F7FYW5_MACMU	LECT1	-0.128	-0.209	0.191	0	-0.225	0.288	0.198	0.0257	0.145	-0.0997	-0.0144	0.514	0.188	-0.351	0.311	-0.328	-0.397	-0.587	0.491
8001	O75874	F7GN57	tr|F7GN57|F7GN57_MACMU	IDH1	0	0.248	-0.0445	0.407	0.435	0.093	-0.0755	0.0608	-0.00606	0.105	0.0356	-0.213	-0.145	-0.091	0.0956	0.0806	-0.181	-0.114	-0.294
11166	O75880	F6SYX2	tr|F6SYX2|F6SYX2_MACMU	SCO1	NA	NA	NA	NA	NA	NA	NA	NA	NA	NA	NA	NA	NA	NA	NA	-1.25	0.227	-0.227	0.509
735	O75882	F6X848	tr|F6X848|F6X848_MACMU	ATRN	-0.172	-0.483	-0.15	-0.281	0.173	-0.18	1.06	0.799	0.279	0.0737	-0.145	0.336	0.0504	-0.141	0.258	-0.591	0	-0.477	0.526
13811	O75884	F6XKW1	tr|F6XKW1|F6XKW1_MACMU	RBBP9	0.108	0.159	0.0168	0.0148	0.118	0.0842	-0.128	-0.0572	-0.279	-0.287	-0.0769	0	-0.0102	0.161	-0.0711	-0.0284	-0.739	0.161	0.143
2234	O75891	F7HB04	tr|F7HB04|F7HB04_MACMU	ALDH1L1	NA	NA	NA	NA	NA	NA	NA	NA	-0.575	0	0.134	-0.192	0.26	-0.914	0.0142	0.235	-0.413	0.33	-0.384
8489	O75936	F6YUX3	tr|F6YUX3|F6YUX3_MACMU	BBOX1	NA	NA	NA	NA	NA	NA	NA	NA	NA	NA	NA	NA	NA	NA	NA	0.14	-0.0649	0.0649	-0.311
2250	O76024	F6Z3A4	tr|F6Z3A4|F6Z3A4_MACMU	WFS1	0.673	0.363	0.634	0.171	0.651	-0.369	-0.759	-0.828	-0.621	-0.336	0.584	0.452	0.23	-0.0169	0.242	-0.773	-0.252	0	-0.75
10686	O76061	F6WDI3	tr|F6WDI3|F6WDI3_MACMU	STC2	-0.106	0	-0.127	0.0509	-0.0117	0.0592	0.231	0.324	-0.00948	-0.13	0.0231	-0.167	-0.113	0.0645	-0.158	0.0125	0.211	0.398	-0.00586
15515	O76070	F7H4X8	tr|F7H4X8|F7H4X8_MACMU	SNCG	0.371	0.393	0.108	0	-0.117	-0.324	-0.085	-0.37	-0.555	0.0642	0.194	0.0057	0.309	0.281	0.151	-0.197	-0.356	-0.122	-0.272
5380	O76082	F7ERN1	tr|F7ERN1|F7ERN1_MACMU	SLC22A5	NA	NA	NA	NA	NA	NA	NA	NA	NA	NA	NA	NA	NA	NA	NA	-0.00816	0.646	-0.268	0.00816
11575	O94760	F7HB67	tr|F7HB67|F7HB67_MACMU	DDAH1	-0.0421	0.0667	-0.202	0.216	0.0349	-0.176	-0.251	-0.338	-0.15	0.0856	0.106	-0.407	-0.209	0.0874	-0.231	0.123	0.211	0.311	0
11218	O94766	F6S2B3	tr|F6S2B3|F6S2B3_MACMU	B3GAT3	0.12	0.000498	-0.248	-0.177	0	-0.0329	-0.0743	-0.0468	-0.0022	-0.0818	-0.131	0.0452	0.0211	0.136	-0.0529	0.0876	0.403	0.255	0.205
1401	O94779	F6V5U5	tr|F6V5U5|F6V5U5_MACMU	CNTN5	-0.141	0	-0.121	-0.174	-0.0177	-0.0744	0.0773	-0.0444	0.0447	-0.321	-0.265	0.0808	0.0883	0.162	0.0333	-0.12	0.174	0.434	0.121
7862	O94788	F7D2Y0	tr|F7D2Y0|F7D2Y0_MACMU	ALDH1A2	0.0573	2.12	-0.0633	0.992	-0.439	0.0304	-0.328	0.0547	-0.141	0.145	0.407	-0.375	-0.0663	0.00718	-0.238	0.0909	-0.407	-0.411	0
2166	O94804	F7GZF5	tr|F7GZF5|F7GZF5_MACMU	STK10	NA	NA	NA	NA	NA	NA	NA	NA	0.0879	-0.473	-0.349	0.0102	0.108	0	-0.151	NA	NA	NA	NA
13206	O94811	F6YD17	tr|F6YD17|F6YD17_MACMU	TPPP	0.921	0.517	-0.0856	-0.016	-0.11	-0.363	0.0358	-0.294	-0.256	0.262	0.123	0.0236	0.00526	-0.0193	0.255	-0.296	0.074	-0.0182	0
4664	O94826	F7GGN2	tr|F7GGN2|F7GGN2_MACMU	TOMM70	0	-0.647	0.228	-0.553	-0.0964	0.215	0.189	-0.734	0.509	-0.769	0.229	0.302	-0.27	0.29	-0.525	0.52	0.0993	-0.0897	-0.00233
3597	O94844	F7FD59	tr|F7FD59|F7FD59_MACMU	RHOBTB1	NA	NA	NA	NA	NA	NA	NA	NA	0.292	0.131	-0.657	0	-0.953	-0.482	0.00647	NA	NA	NA	NA
3068	O94874	F7F4F6	tr|F7F4F6|F7F4F6_MACMU	UFL1	0.0516	-0.323	0.335	0.633	-0.0516	-0.174	0.6	-0.157	NA	NA	NA	NA	NA	NA	NA	NA	NA	NA	NA
1742	O94898	F6TF31	tr|F6TF31|F6TF31_MACMU	LRIG2	-0.491	-0.182	0	-0.278	0.0734	-0.232	0.0436	0.164	0.239	0.0234	-0.21	-0.103	-0.219	0.00115	-0.116	-0.218	0.00444	0.01	0.055
11879	O94903	F6R5U2	tr|F6R5U2|F6R5U2_MACMU	PROSC	0.206	0.522	0.0741	0.676	0.0622	-0.0338	-0.381	-0.137	-0.643	-0.0364	0.521	-0.133	0.19	0.0798	0.0772	0	-0.108	-0.038	-0.369
2531	O94906	F6Q8L4	tr|F6Q8L4|F6Q8L4_MACMU	PRPF6	0.548	0.342	-0.0716	-0.1	-0.0314	-0.484	0.0644	-0.315	0.209	0.133	-0.0171	0.478	0.191	0	-0.658	NA	NA	NA	NA
621	O94910	F7C0V2	tr|F7C0V2|F7C0V2_MACMU	ADGRL1	0.0484	-0.0409	-0.265	-0.00513	-0.0489	0.0396	-0.0235	-0.11	0.106	-0.108	-0.232	0	0.0675	0.195	-0.0663	0.076	0.38	0.385	0.0407
6480	O94919	F7AJA1	tr|F7AJA1|F7AJA1_MACMU	ENDOD1	0.175	0.179	-0.00646	-0.0187	-0.0708	-0.239	-0.0325	-0.176	-0.0379	-0.125	0.176	0	0.0171	0.261	-0.259	0.225	0.175	0.487	0.447
1860	O94933	F7GMP9	tr|F7GMP9|F7GMP9_MACMU	SLITRK3	NA	NA	NA	NA	NA	NA	NA	NA	NA	NA	NA	NA	NA	NA	NA	-0.0803	0.11	0.00217	-0.00217
2184	O94973	F6QED1	tr|F6QED1|F6QED1_MACMU	AP2A2	NA	NA	NA	NA	NA	NA	NA	NA	0.348	0.153	-0.0461	0	0.146	0.32	0.077	-0.16	-0.308	-0.0517	-0.0924
1706	O94985	F7HLB8	tr|F7HLB8|F7HLB8_MACMU	CLSTN1	-0.23	-0.21	0.133	-0.22	0.0721	-0.116	0.34	0.307	0.362	-0.0193	0	-0.0446	-0.161	0.0573	0.122	-0.198	0.26	-0.0852	0.102
1784	O94991	F7HHZ1	tr|F7HHZ1|F7HHZ1_MACMU	SLITRK5	0.0681	0.109	-0.277	-0.117	-0.0773	0.0205	-0.243	-0.396	0	-0.139	0.14	-0.168	-0.274	0.188	-0.296	0.121	0.289	0.654	0.0149
94	O95071	F7HEG3	tr|F7HEG3|F7HEG3_MACMU	UBR5	NA	NA	NA	NA	NA	NA	NA	NA	0.357	-0.281	-0.0156	1.02	0.144	0.591	-0.133	-0.366	-0.497	0	0.322
8382	O95084	Q1WK23	sp|Q1WK23|PRS23_MACMU	PRSS23	NA	NA	NA	NA	NA	NA	NA	NA	-0.464	-0.0863	-0.414	-0.0986	0.39	0.0826	0	-0.303	0.231	0.111	0.197
11128	O95159	F6ZWZ7	tr|F6ZWZ7|F6ZWZ7_MACMU	ZFPL1	NA	NA	NA	NA	NA	NA	NA	NA	-1.1	0.0559	-1.37	0	-0.237	-0.332	1.01	0.127	0.176	0.254	-0.253
13912	O95169	F7H444	tr|F7H444|F7H444_MACMU	NDUFB8	-1.58	-0.679	-0.182	0.182	0.395	0.244	1.46	-0.238	NA	NA	NA	NA	NA	NA	NA	NA	NA	NA	NA
15883	O95183	F6ZVR0	tr|F6ZVR0|F6ZVR0_MACMU	VAMP5	0	-0.348	-0.305	-0.00647	-0.143	0.406	0.38	0.299	0.354	0.156	0.33	-0.0307	-0.0942	-0.074	0.177	0.313	-0.542	-0.147	0.823
5535	O95196	F7BKT3	tr|F7BKT3|F7BKT3_MACMU	CSPG5	0.163	0.194	-0.224	0.248	0.146	-0.116	-0.138	0	0.262	-0.189	-0.0104	0.344	0.0372	0.236	-0.359	-0.123	-0.124	0.435	-0.002
1488	O95206	F7HA59	tr|F7HA59|F7HA59_MACMU	PCDH8	0	0.204	-0.298	0.309	0.0538	0.0223	-0.0745	0.0404	-0.0811	-0.224	-0.002	0.467	-0.0322	0.0888	-0.0435	-0.158	0.0124	0.499	-0.219
7681	O95219	F6TZZ6	tr|F6TZZ6|F6TZZ6_MACMU	SNX4	NA	NA	NA	NA	NA	NA	NA	NA	0.131	0	-0.393	0.0258	-0.402	-0.41	0.0716	NA	NA	NA	NA
7807	O95232	F7H6R2	tr|F7H6R2|F7H6R2_MACMU	LUC7L3	-0.316	-0.171	0.171	-0.22	0.179	-0.323	0.468	0.325	NA	NA	NA	NA	NA	NA	NA	NA	NA	NA	NA
12636	O95292	F7ATW4	tr|F7ATW4|F7ATW4_MACMU	VAPB	NA	NA	NA	NA	NA	NA	NA	NA	NA	NA	NA	NA	NA	NA	NA	0.0618	-0.304	0.064	-0.0618
12685	O95297	F7HPB4	tr|F7HPB4|F7HPB4_MACMU	MPZL1	NA	NA	NA	NA	NA	NA	NA	NA	0.0225	-0.154	-0.2	0.0636	-0.133	0.0331	0	NA	NA	NA	NA
4866	O95302	F7HEF9	tr|F7HEF9|F7HEF9_MACMU	FKBP9	NA	NA	NA	NA	NA	NA	NA	NA	-0.275	-0.853	0.733	-0.736	-0.325	0.0151	-0.17	0	0.206	0.0361	0.291
13237	O95336	F7HJF1	tr|F7HJF1|F7HJF1_MACMU	PGLS	0.0968	0.14	0.313	0.327	0.00614	0.0666	-0.0921	-0.0448	-0.175	0.107	0	0.0206	-0.000828	-0.0973	0.18	-0.0881	-0.0268	-0.187	-0.117
1193	O95347	F7GYQ6	tr|F7GYQ6|F7GYQ6_MACMU	SMC2	NA	NA	NA	NA	NA	NA	NA	NA	0.244	0	-0.209	0.133	-0.351	-0.422	0.481	NA	NA	NA	NA
8266	O95363	F7GQ38	tr|F7GQ38|F7GQ38_MACMU	FARS2	NA	NA	NA	NA	NA	NA	NA	NA	-2.66	-0.246	1.05	-0.527	0.0095	0	0.17	NA	NA	NA	NA
954	O95382	F7HFE8	tr|F7HFE8|F7HFE8_MACMU	MAP3K6	0.0388	0.106	0.00195	0.181	-0.00195	-0.77	-0.731	-1.02	NA	NA	NA	NA	NA	NA	NA	NA	NA	NA	NA
11679	O95390	F7H0W8	tr|F7H0W8|F7H0W8_MACMU	GDF11	-0.0129	-0.0955	-0.271	0.106	-0.141	0.263	0.0133	0	-0.167	-0.157	0.0306	-0.362	-0.081	0.121	0.0442	0.129	0.173	0.127	-0.0814
4659	O95391	F6UYL6	tr|F6UYL6|F6UYL6_MACMU	SLU7	NA	NA	NA	NA	NA	NA	NA	NA	0.0464	-0.508	0.141	-0.0471	0.808	0	0.571	-0.297	0.449	-0.999	-0.641
5579	O95394	F7FDZ2	tr|F7FDZ2|F7FDZ2_MACMU	PGM3	-0.127	0.595	-0.0339	0.672	0.0657	0.00379	-0.105	0.244	0.0687	0.23	-0.00203	-0.144	0	0.0195	0.207	-0.151	-0.29	-0.0886	-0.344
960	O95428	F6WT57	tr|F6WT57|F6WT57_MACMU	PAPLN	0.557	0.345	-0.0214	-0.207	-0.13	-0.017	-0.178	-0.000351	0	0.183	-0.0466	-0.251	0.315	0.567	-0.0653	0.209	0.128	1.02	0.455
9696	O95433	F7FRS5	tr|F7FRS5|F7FRS5_MACMU	AHSA1	0.603	0.747	0.306	0.217	0.171	-0.0931	-0.239	-0.379	-0.519	-0.103	0.711	-0.0887	0.292	0.266	0.241	-0.357	-0.28	-0.165	0
4324	O95447	F7D2V2	tr|F7D2V2|F7D2V2_MACMU	LCA5L	0.31	0.298	0.322	-0.328	-0.0834	0.0042	-0.0042	-0.379	NA	NA	NA	NA	NA	NA	NA	NA	NA	NA	NA
995	O95450	F7HGS6	tr|F7HGS6|F7HGS6_MACMU	ADAMTS2	0.137	-0.0946	-0.252	-0.00688	-0.118	0.437	0.205	0.276	0	0.153	-0.369	-0.272	0.547	1.03	-0.0403	-0.671	0.354	-0.18	0.0819
2937	O95461	F6QJZ2	tr|F6QJZ2|F6QJZ2_MACMU	LARGE1	NA	NA	NA	NA	NA	NA	NA	NA	NA	NA	NA	NA	NA	NA	NA	-0.0724	0.0724	0.176	-0.243
12001	O95478	F6USY1	tr|F6USY1|F6USY1_MACMU	NSA2	NA	NA	NA	NA	NA	NA	NA	NA	NA	NA	NA	NA	NA	NA	NA	-0.0535	-0.237	1.01	0.0535
2852	O95479	F7GGI8	tr|F7GGI8|F7GGI8_MACMU	H6PD	NA	NA	NA	NA	NA	NA	NA	NA	NA	NA	NA	NA	NA	NA	NA	0.143	-0.256	0.123	-0.123
6394	O95497	F6WUX9	tr|F6WUX9|F6WUX9_MACMU	VNN1	-0.217	-0.0873	-0.0422	0.371	0.162	-0.028	0.302	0.505	0.0208	0.17	0	0.00658	-0.37	-0.418	0.232	-0.457	-0.0121	-0.266	0.532
7221	O95502	F7AP45	tr|F7AP45|F7AP45_MACMU	NPTXR	0.471	0.235	-0.481	-0.0472	-0.143	-0.0677	-0.154	-0.406	0.124	0	-0.294	0.0786	0.173	0.435	-0.345	-0.111	0.308	0.674	0.196
93	O95613	F6S0J0	tr|F6S0J0|F6S0J0_MACMU	PCNT	NA	NA	NA	NA	NA	NA	NA	NA	0	-0.102	-0.238	0.505	-0.305	0.222	0.00369	NA	NA	NA	NA
12578	O95633	F7F6P1	tr|F7F6P1|F7F6P1_MACMU	FSTL3	0.143	0.455	-0.054	-0.253	-0.176	-0.114	-0.126	0.176	-0.31	-0.239	0.166	0.301	0	-0.197	-0.146	0.166	0.0509	0.342	0.244
5973	O95678	F7E5F7	tr|F7E5F7|F7E5F7_MACMU	KRT75	NA	NA	NA	NA	NA	NA	NA	NA	0	-0.707	0.262	-0.314	1.06	-0.676	0.578	NA	NA	NA	NA
14553	O95711	F7EXD4	tr|F7EXD4|F7EXD4_MACMU	LY86	-0.924	0.411	-0.346	-0.672	-0.547	0	0.264	0.121	0.0933	-0.779	0.343	-0.632	-0.31	0.306	0.0991	0.424	-0.0517	0.463	-0.44
5914	O95747	F6SQU7	tr|F6SQU7|F6SQU7_MACMU	OXSR1	NA	NA	NA	NA	NA	NA	NA	NA	NA	NA	NA	NA	NA	NA	NA	-0.102	0.102	-0.216	0.143
2751	O95757	F6VUK9	tr|F6VUK9|F6VUK9_MACMU	HSPA4L	0.124	-0.107	0.184	0.107	-0.486	1.54	-1.75	-0.137	NA	NA	NA	NA	NA	NA	NA	NA	NA	NA	NA
15885	O95777	F7AG10	tr|F7AG10|F7AG10_MACMU	LSM8	NA	NA	NA	NA	NA	NA	NA	NA	0.157	0.183	-0.352	-0.0161	0.275	-0.152	0.259	0	-0.171	-0.143	0.0975
5050	O95817	F6R2V4	tr|F6R2V4|F6R2V4_MACMU	BAG3	0.0117	0.401	0.252	0.179	-0.13	0	-0.468	-0.78	-0.45	-0.263	0.148	0.274	0.131	-0.246	-0.0462	0.23	-0.758	0.106	-0.261
13928	O95825	F6SFJ5	tr|F6SFJ5|F6SFJ5_MACMU	CRYZL1	0.698	0.139	0.134	-0.0758	0.0224	-0.0224	-0.0424	-0.514	NA	NA	NA	NA	NA	NA	NA	NA	NA	NA	NA
3897	O95834	F6R3N5	tr|F6R3N5|F6R3N5_MACMU	EML2	0.148	0.404	0.0904	0.413	-0.0614	-0.0358	0.103	0.215	-0.113	-0.0398	0.0657	-0.0631	0.066	-0.289	0.971	0	-0.0541	-0.116	-0.0992
1199	O95835	F6WYK6	tr|F6WYK6|F6WYK6_MACMU	LATS1	NA	NA	NA	NA	NA	NA	NA	NA	0.0636	0.249	0	-0.0983	-0.251	-0.422	0.328	NA	NA	NA	NA
7895	O95841	F6TGU7	tr|F6TGU7|F6TGU7_MACMU	ANGPTL1	-0.0259	-0.167	-0.131	0.0122	0.193	-0.0226	-0.0609	0.0127	-0.0258	-0.395	0.0268	-0.213	0.297	0.23	-0.088	0	0.00772	0.0905	0.315
13810	O95848	F6RM61	tr|F6RM61|F6RM61_MACMU	NUDT14	-0.0936	-0.0561	-0.109	0.341	0.0561	0.525	0.136	-0.11	NA	NA	NA	NA	NA	NA	NA	NA	NA	NA	NA
11543	O95865	F6SMQ4	tr|F6SMQ4|F6SMQ4_MACMU	DDAH2	0.013	0.0735	0	0.535	0.0141	0.0871	-0.0983	-0.0281	-0.167	-0.0501	0.0585	-0.115	0.159	0.15	-0.108	0.0105	-0.22	-0.233	-0.147
6982	O95897	F6U4R3	tr|F6U4R3|F6U4R3_MACMU	OLFM2	NA	NA	NA	NA	NA	NA	NA	NA	0.345	-0.463	0	-0.157	0.322	0.282	-0.0166	-0.0631	0.113	0.0445	-0.037
5000	O95965	F7HFS4	tr|F7HFS4|F7HFS4_MACMU	ITGBL1	-0.0672	-0.0788	0.0209	-0.145	-0.0431	0.272	0.141	0.164	0.307	-0.138	-0.0277	0	-0.0199	-0.00877	0.225	0.556	0.404	-0.213	0.148
11846	O95967	F6QSI0	tr|F6QSI0|F6QSI0_MACMU	EFEMP2	-0.0127	-0.188	0.0335	-0.394	-0.0326	-0.0759	0.302	0.191	0.219	-0.00346	-0.0677	-0.0568	0	0.0431	-0.0309	0.311	0.467	0.437	0.0737
5098	O95970	F7GS70	tr|F7GS70|F7GS70_MACMU	LGI1	0.29	0	0.207	-0.359	0.0332	0.342	-0.268	-0.149	0.0112	-0.101	-0.0688	-0.0484	0.617	-0.127	-0.142	0.123	0.334	0.0238	-0.163
1594	O95980	F6Z6L8	tr|F6Z6L8|F6Z6L8_MACMU	RECK	-0.0986	0	-0.0534	-0.356	-0.0142	0.0351	0.0618	0.0289	0.157	0.025	-0.0317	-0.0891	-0.15	-0.0815	-0.0522	0.155	0.235	0.345	0.108
14305	O95989	F7CRJ0	tr|F7CRJ0|F7CRJ0_MACMU	NUDT3	NA	NA	NA	NA	NA	NA	NA	NA	-0.378	-0.104	0.0222	0.124	0.774	-0.127	0.529	-0.0833	0	0.0689	-0.114
7113	O95995	F6X594	tr|F6X594|F6X594_MACMU	GAS8	NA	NA	NA	NA	NA	NA	NA	NA	NA	NA	NA	NA	NA	NA	NA	0.00849	-0.48	0.155	-0.00849
7482	O96019	F6ZQD7	tr|F6ZQD7|F6ZQD7_MACMU	ACTL6A	NA	NA	NA	NA	NA	NA	NA	NA	NA	NA	NA	NA	NA	NA	NA	-0.994	1.54	-0.555	0.555
15078	P00167	F7FB28	tr|F7FB28|F7FB28_MACMU	CYB5A	NA	NA	NA	NA	NA	NA	NA	NA	0.428	-0.28	0.0138	0	0.231	-0.0157	-0.0431	0.612	0.0902	-0.182	-0.42
10211	P00338	F6R1N2	tr|F6R1N2|F6R1N2_MACMU	LDHA	0.568	0.446	0.282	0.354	0.428	-0.405	-0.313	-0.207	-0.459	-0.188	0.314	0.231	0.0864	-0.0501	-0.0418	0	-0.31	0.116	-0.448
6150	P00352	F6YY71	tr|F6YY71|F6YY71_MACMU	ALDH1A1	-0.513	0.364	-0.25	1.36	-0.797	0.152	-0.354	0.951	-0.0856	0.209	0.904	-0.38	-0.0857	0.318	0.369	-0.0328	0	-0.164	0.0726
6405	P00367	F7HP31	tr|F7HP31|F7HP31_MACMU	GLUD1	0	0.267	1.03	0.584	0.144	0.285	-0.0505	-0.114	-0.375	0.649	-0.254	0.0456	0.579	-0.24	1.03	-0.399	-0.0686	-0.372	-0.0423
14889	P00441	Q8HXQ0	sp|Q8HXQ0|SODC_MACMU	SOD1	0.275	0.0242	-0.0859	0.274	0.149	-0.311	-0.149	-0.442	-0.227	-0.408	0.182	0	-0.0927	0.231	-0.305	0.0831	0.112	0.518	-0.107
1386	P00450	F7GFB4	tr|F7GFB4|F7GFB4_MACMU	CP	-0.328	-0.118	0.081	-0.0354	-0.000969	0.0187	0.415	0.35	0.11	-0.11	0.175	0.0764	-0.0304	-0.0757	0.295	0.371	-0.173	0	-0.178
187	P00451	F6QMC6	tr|F6QMC6|F6QMC6_MACMU	F8	-0.22	-0.0609	0.05	0	0.00697	-0.0778	0.32	0.365	0.103	-0.0465	0.228	0.372	-0.161	-0.0463	0.109	0.0702	-0.342	-0.0694	-0.114
3279	P00488	F7D3L5	tr|F7D3L5|F7D3L5_MACMU	F13A1	0.0215	-0.161	0.134	-0.0124	-0.0093	0.188	0.517	0.477	0.231	0.294	-0.0314	-0.143	-0.344	0.139	0	-0.309	-0.136	-0.133	0.31
11560	P00491	F7H566	tr|F7H566|F7H566_MACMU	PNP	0.121	0.124	0.146	0.286	0.0375	-0.0863	-0.0848	0.149	-0.497	0.36	0.072	0.0602	-0.104	-0.0399	0.0681	-0.341	-0.111	-0.639	-0.262
13480	P00492	F7H6Y5	tr|F7H6Y5|F7H6Y5_MACMU	HPRT1	0.481	0.477	0.373	0.431	0.557	-0.238	-0.105	-0.0196	-0.29	-0.0553	0.671	0.481	0.213	0.254	-0.115	-0.114	-0.125	-0.0454	0
7682	P00505	F6UDV1	tr|F6UDV1|F6UDV1_MACMU	GOT2	0.576	0.162	0.147	0.695	0.174	-0.189	-0.209	-0.416	NA	NA	NA	NA	NA	NA	NA	-0.147	-0.276	-0.274	0.196
8077	P00558	F6UJ08	tr|F6UJ08|F6UJ08_MACMU	PGK1	0.631	0.708	0	0.634	0.428	-0.0365	-0.012	-0.134	-0.363	0.327	0.8	-0.372	0.107	0.386	0.126	-0.0534	-0.228	-0.364	-0.136
14971	P00709	F6X0Y7	tr|F6X0Y7|F6X0Y7_MACMU	LALBA	1.11	0.205	0.379	-0.376	0.582	0.675	-0.203	-0.0457	-1.04	-0.161	2.36	0.355	0.871	0.405	-0.137	-0.239	-0.333	0	-0.467
5577	P00734	F7CHB6	tr|F7CHB6|F7CHB6_MACMU	F2	-0.449	-0.27	0.147	-0.0449	-0.129	-0.281	0.557	0.267	0.13	0.436	-0.547	0.338	0.0357	-0.0524	0.216	-0.193	-0.0649	0	0.57
5483	P00736	F7DNJ5	tr|F7DNJ5|F7DNJ5_MACMU	C1R	0.0742	0.28	0.319	-0.116	-0.00801	0.181	-0.112	0.0716	0.139	0	0.463	-0.1	0.045	-0.206	-0.0565	0.173	-0.0388	-0.118	-0.157
9468	P00738	F6Z0T5	tr|F6Z0T5|F6Z0T5_MACMU	HP	0.227	0.701	-0.551	1.21	-0.632	-0.144	0.553	-0.704	-0.293	-0.299	0.322	0.518	0.73	0.703	-1.75	0.101	-0.622	-0.226	0
6727	P00740	F7GHR4	tr|F7GHR4|F7GHR4_MACMU	F9	-0.446	0.038	-0.111	0.0388	-0.198	-0.0357	0.5	0.137	-0.287	0.422	-0.239	0.101	0.016	0.0235	0.0696	0	-0.103	-0.166	-0.042
12361	P00746	F6YBP7	tr|F6YBP7|F6YBP7_MACMU	CFD	-0.0129	-0.173	0.0621	-0.16	-0.328	0.109	-0.0713	0.00489	0	0.0326	0.0912	-0.112	-0.107	-0.0876	-0.0532	0.563	0.333	0.865	0.0884
2530	P00747	P12545	sp|P12545|PLMN_MACMU	PLG	-0.457	-0.0985	-0.161	0.0943	0.0344	-0.0938	0.606	0.519	0.204	0.669	-0.43	0.147	-0.288	0	0.222	-0.092	-0.0334	-0.362	0.279
4358	P00748	F7FY72	tr|F7FY72|F7FY72_MACMU	F12	-0.143	-0.294	-0.0815	-0.274	-0.112	0.0461	0.287	0.321	0.201	0.511	-0.232	0.211	-0.492	-0.436	0.451	0	0.383	-0.261	0.365
3121	P00751	F6YJY7	tr|F6YJY7|F6YJY7_MACMU	CFB	0.153	0.17	0.133	0.0167	0	0.17	-0.0664	-0.0599	0.175	-0.0392	0.361	-0.0293	-0.0753	0.138	-0.192	0.242	-0.705	-0.176	-0.278
9353	P00813	F7CBG9	tr|F7CBG9|F7CBG9_MACMU	ADA	0	-0.337	0.15	0.0683	-0.146	0.137	-0.298	-0.19	0.126	-0.357	0.0476	-0.0163	-0.36	-0.0746	0.12	0.41	0.0781	0.842	-0.39
12203	P00915	P00916	sp|P00916|CAH1_MACMU	CA1	-0.883	-0.899	-0.345	0.372	-0.304	-0.169	0.287	1.32	0.317	0.665	-0.414	-0.551	0.0132	0.773	0.138	-0.494	0.774	-1.14	0
11880	P00918	F6TQ14	tr|F6TQ14|F6TQ14_MACMU	CA2	-0.0227	0.0806	-0.00498	1.96	-0.278	0.295	-0.0867	0.552	-0.138	0.323	0	-0.258	0.519	1.36	-0.0369	-0.664	0.971	-0.803	0.401
16065	P00995	F7HE31	tr|F7HE31|F7HE31_MACMU	SPINK1	0.427	0.318	-0.254	-0.0897	0	-0.134	-0.103	-0.328	0.375	0.0733	-0.346	-0.0916	0.0167	-0.044	-0.119	0.0573	0.241	0.303	0.28
7774	P01008	F6Y0N9	tr|F6Y0N9|F6Y0N9_MACMU	SERPINC1	-0.458	-0.32	-0.097	-0.0415	0.00499	0	0.492	0.359	0.345	0.56	-0.349	0.199	-0.24	-0.25	0.144	-0.225	0.0788	-0.301	0.17
8638	P01009	F6SEN6	tr|F6SEN6|F6SEN6_MACMU	SERPINA1	-0.226	0.157	-0.129	-0.0645	-0.084	-0.314	0.218	0.403	0.262	0.694	-0.276	0.18	-0.63	-0.128	0.228	0.2	-0.537	0.276	0
9078	P01011	F6SL79	tr|F6SL79|F6SL79_MACMU	SERPINA3	0.808	1.33	0.47	0.226	0.801	-0.288	-0.406	-0.529	-0.742	-0.0547	0.457	1.27	0.11	0.0107	0	-0.167	-2.04	-0.00724	-1.13
7360	P01019	F6TLR3	tr|F6TLR3|F6TLR3_MACMU	AGT	0.297	0.00926	0	-0.0603	-0.0689	-0.22	-0.0629	-0.143	0.356	-0.431	0.315	-0.208	-0.0258	0.457	-0.489	0.171	0.326	0.349	0.511
720	P01023	F6TNV9	tr|F6TNV9|F6TNV9_MACMU	A2M	-0.335	0	0.425	-0.102	-0.139	-0.397	0.0596	0.269	-0.219	0.582	-0.244	0.147	-0.386	-0.436	0.375	0.149	-0.325	0.379	0.157
522	P01031	F7GHV1	tr|F7GHV1|F7GHV1_MACMU	C5	-0.558	-0.508	0.102	-0.148	0.0357	0	0.807	0.913	0.15	0.82	-0.462	0.306	-0.535	-0.0762	0.558	-0.299	-0.28	-0.285	0.157
13283	P01033	Q95KL9	sp|Q95KL9|TIMP1_MACMU	TIMP1	0.304	1.04	0.545	-0.0498	0.546	-0.116	0.0012	0.158	-0.298	0.0263	0.212	1.52	-0.115	-0.447	-0.18	0	-0.27	-0.171	-0.17
14913	P01034	O19092	sp|O19092|CYTC_MACMU	CST3	0.111	-0.423	-0.431	-0.0842	-0.332	0	0.0138	0.169	0.134	-0.248	-0.0643	-0.243	-0.0296	0.355	-0.0896	0.314	0.597	0.767	0.0339
15316	P01036	F6ZNT9	tr|F6ZNT9|F6ZNT9_MACMU	CST4	-0.316	0.171	-0.271	-0.0632	-0.389	0.475	0.352	0.162	0.00161	-0.112	1.47	-0.491	-0.623	-0.365	0	0.623	1.05	0.618	-0.172
4341	P01042	F6SG43	tr|F6SG43|F6SG43_MACMU	KNG1	-0.674	-0.545	0.0526	-0.18	0.0121	-0.056	0.734	0.466	0.456	0.795	-0.466	0.171	-0.523	-0.14	0.483	0	-0.118	-0.26	0.478
12463	P01127	F7HKP4	tr|F7HKP4|F7HKP4_MACMU	PDGFB	-1.12	0.071	-0.293	0.00164	-0.34	0.156	-0.465	0.107	0	-0.245	-0.176	0.0219	0.012	0.385	-0.482	-0.234	-0.377	0.202	0.0308
1142	P01133	F6TFM0	tr|F6TFM0|F6TFM0_MACMU	EGF	NA	NA	NA	NA	NA	NA	NA	NA	0.165	0.0531	0	-0.046	-0.355	-0.281	0.0818	NA	NA	NA	NA
12530	P01138	F6T3M7	tr|F6T3M7|F6T3M7_MACMU	NGF	NA	NA	NA	NA	NA	NA	NA	NA	NA	NA	NA	NA	NA	NA	NA	-0.0431	0.0431	-0.0775	0.15
15111	P01178	F7AXI7	tr|F7AXI7|F7AXI7_MACMU	OXT	-0.276	0	0.0782	-0.0648	-0.0581	0.161	0.183	0.107	0.0713	-0.00133	-0.0889	-0.0561	-0.339	-0.113	-0.073	0.13	0.473	0.0652	0.385
12114	P01189	F7GBI0	tr|F7GBI0|F7GBI0_MACMU	POMC	NA	NA	NA	NA	NA	NA	NA	NA	0	-0.0415	0.259	-0.191	0.0874	-0.116	-0.0946	0.149	1.55	-0.851	0.228
12027	P01210	F7H3N8	tr|F7H3N8|F7H3N8_MACMU	PENK	0.348	-0.331	-0.55	-0.418	-0.394	-0.0623	0.241	0.382	0.242	-0.0649	-0.711	-0.384	0.236	0.606	0	-0.0154	0.59	0.506	0.341
12563	P01213	F6R267	tr|F6R267|F6R267_MACMU	PDYN	-0.215	-0.0111	-0.394	-0.319	-0.547	0.0359	0	0.148	-0.0175	0.0131	-0.834	0.0855	-0.181	0.281	0.0159	-0.44	0.156	0.315	0.206
12956	P01236	P55151	sp|P55151|PRL_MACMU	PRL	0.248	0.0973	-0.158	-0.233	0.295	-0.411	0.0141	-0.376	-0.474	-0.426	0.403	-0.325	1.58	0	0.307	2.34	-0.0382	-0.416	0.187
15818	P01303	Q9XSW6	sp|Q9XSW6|NPY_MACMU	NPY	-0.013	0.055	-0.452	-0.0216	-0.205	0.19	0	-0.072	-0.0102	0.0416	-0.12	-0.28	0.151	0.236	-0.122	0.0501	0.0633	0.548	0.312
14605	P01591	F7HLZ2	tr|F7HLZ2|F7HLZ2_MACMU	JCHAIN	-0.35	-0.322	0.265	-0.0784	-0.132	0.117	0.823	0.953	0.776	1.04	-0.386	0.591	0	-0.198	-0.169	1.22	-0.432	-0.404	0.656
15656	P01602	F7BMY9	tr|F7BMY9|F7BMY9_MACMU		-0.463	-0.491	-0.0226	0.2	0.0515	-0.239	0.899	0.295	0.563	0	-0.0882	0.217	-0.499	-0.206	0.684	0.376	-0.16	-0.321	0.254
12971	P01732	F7DXL7	tr|F7DXL7|F7DXL7_MACMU	CD8A	NA	NA	NA	NA	NA	NA	NA	NA	-0.167	0.108	0.211	-0.264	-0.0918	-0.0101	-0.307	0.958	0	0.446	0.423
15708	P01764	H9H366	tr|H9H366|H9H366_MACMU		NA	NA	NA	NA	NA	NA	NA	NA	0.708	0	-0.339	-0.289	-0.409	1.47	1.07	NA	NA	NA	NA
4228	P01833	F6WY82	tr|F6WY82|F6WY82_MACMU	PIGR	-0.622	-0.35	0.127	-0.0895	-0.213	-0.111	0.0823	0.24	-0.233	0.495	-0.446	-0.0925	-0.134	0.563	0	0.35	0.283	0.411	0.676
9086	P01854	H9H4Y2	tr|H9H4Y2|H9H4Y2_MACMU		NA	NA	NA	NA	NA	NA	NA	NA	0.569	1.47	-0.64	-0.0237	0.417	-0.463	0.54	-0.509	-0.103	0	0.247
8359	P01871	F6W3M2	tr|F6W3M2|F6W3M2_MACMU		-0.886	-0.6	0.708	-0.49	-0.47	0.106	0.705	1.14	0.285	0.766	-0.71	0.581	0	-0.253	-0.354	1.82	-1.02	-0.831	0.435
10976	P01876	H9H4Y3	tr|H9H4Y3|H9H4Y3_MACMU		-0.928	-0.548	0.994	-0.26	-0.106	-0.221	1.32	1.79	1.38	1.32	0	1.12	-1.39	-0.9	0.0279	1.17	-0.244	-0.25	1.16
12481	P01911	A4Q982	tr|A4Q982|A4Q982_MACMU	HLA-DRB1	-0.0952	0.0954	-0.0137	-0.00674	-0.329	0.769	0.0629	0.00674	NA	NA	NA	NA	NA	NA	NA	NA	NA	NA	NA
14902	P02100	Q28507	sp|Q28507|HBE_MACMU	HBE1	-0.299	-0.637	-0.597	2.14	-0.563	0.265	-0.0321	2.01	0.125	0.995	-0.624	-0.973	1.24	2.15	0	-0.825	1.2	-1.27	0.267
14796	P02144	F7ARV1	tr|F7ARV1|F7ARV1_MACMU	MB	-0.396	-0.174	0.255	0.122	0.318	-0.0217	0.628	0.418	1.01	-0.00621	-0.359	0	0.197	-0.0529	0.225	-0.337	-0.366	-0.939	0.882
599	P02452	F7BJV7	tr|F7BJV7|F7BJV7_MACMU	COL1A1	-0.29	-0.447	-0.45	-0.074	0.0294	0.619	0	0.447	-0.182	-0.113	0.113	-0.368	0.163	0.512	0.12	-0.244	1.02	-1.02	0.0373
523	P02458	F7B3Z7	tr|F7B3Z7|F7B3Z7_MACMU	COL2A1	0.032	-0.424	-0.265	-0.368	-0.00672	0.127	0.178	0.122	0	0.137	-0.219	-0.207	0.361	0.304	-0.0539	0.214	0.855	-0.198	-0.161
524	P02461	F6V7P3	tr|F6V7P3|F6V7P3_MACMU	COL3A1	-0.203	-0.243	-0.321	0.0165	0.00214	0.323	-0.0741	0.279	0.128	-0.0605	0	-0.309	0.248	0.403	0.203	-0.0955	0.673	-0.676	-0.172
14364	P02489	P02488	sp|P02488|CRYAA_MACMU	CRYAA	NA	NA	NA	NA	NA	NA	NA	NA	-0.108	2.87	-0.153	0.373	0	0.108	0.0374	-0.572	-0.313	0.596	-0.0684
14151	P02511	F7H3G0	tr|F7H3G0|F7H3G0_MACMU	CRYAB	0.304	0.19	0	0.64	-0.477	0.223	-0.315	-0.0578	-0.75	0.8	0.0454	-0.575	0.566	-0.441	0.215	-0.272	-0.358	-0.362	0.031
4257	P02545	F7GLE9	tr|F7GLE9|F7GLE9_MACMU	LMNA	-0.625	-0.39	0.152	1.03	0.186	-0.132	0.332	0.409	0.2	0.766	-0.376	0.175	-0.25	-0.0611	1.01	0	-0.225	-0.125	-0.396
14625	P02585	F7HGA7	tr|F7HGA7|F7HGA7_MACMU	TNNC2	0.831	0.349	0.768	1.34	0.905	-0.548	-0.815	-0.789	-0.557	-0.102	1.32	0.621	0	0.154	0.0271	-0.439	-0.357	-0.548	-0.321
16154	P02652	P02653	sp|P02653|APOA2_MACMU	APOA2	-0.286	-0.51	0.364	-0.0405	-0.151	-0.447	1.02	0.437	0.427	0.437	-0.597	0.0314	-0.359	0	0.466	-0.714	0.181	-1.07	0.0645
16267	P02654	F6Z2H8	tr|F6Z2H8|F6Z2H8_MACMU	APOC1	0	0.0387	0.0201	-0.103	-0.378	-0.489	0.381	0.672	-0.414	0.0801	-0.821	0.522	0.000841	-0.135	-0.192	-0.583	0.23	-0.561	0.547
16002	P02656	F7FQN1	tr|F7FQN1|F7FQN1_MACMU	APOC3	-0.594	-0.686	-0.0779	0.303	-0.381	-0.174	1.21	0.377	0.0675	-0.242	-0.359	0.331	0.0862	0.189	0.0442	-0.448	0.233	-0.492	0
6233	P02675	F6UZ87	tr|F6UZ87|F6UZ87_MACMU	FGB	-0.0965	0.0751	0	-1.36	0.449	-0.308	1.28	1.41	0.88	-1.02	-0.417	0.743	0.381	0.114	-1.2	-0.351	-0.425	-0.469	0.621
7077	P02679	F6UYY8	tr|F6UYY8|F6UYY8_MACMU	FGG	-0.103	0.0576	0	-1.83	0.575	-0.207	1.44	1.65	0.96	-1.25	-0.286	0.83	0.44	0.213	-1.39	-0.405	-0.529	-0.602	1.01
15233	P02689	F7GMK1	tr|F7GMK1|F7GMK1_MACMU	PMP2	NA	NA	NA	NA	NA	NA	NA	NA	-0.324	1	0.377	-0.628	0	-0.00676	0.494	NA	NA	NA	NA
3866	P02730	F7H5B9	tr|F7H5B9|F7H5B9_MACMU	SLC4A1	NA	NA	NA	NA	NA	NA	NA	NA	-0.471	0.199	0	-0.0871	0.343	1.37	-0.126	-0.842	0.53	-0.35	0.376
13413	P02741	F7DHQ1	tr|F7DHQ1|F7DHQ1_MACMU	CRP	-0.163	-0.119	-0.122	1.38	0.469	0.508	0.32	2.01	-0.486	-0.442	0.612	0.391	-1.05	-0.309	0.48	0	-0.412	1.04	-0.628
13429	P02743	F7H1V9	tr|F7H1V9|F7H1V9_MACMU	APCS	-0.849	0.331	-0.111	0.799	-0.166	-0.249	0.616	0.573	0.264	0.0163	-0.254	0.599	0.327	0.103	-0.0261	-0.54	0	-0.486	-0.458
12318	P02747	F7HEL0	tr|F7HEL0|F7HEL0_MACMU	C1QC	-0.0332	0	0.248	-0.259	-0.0788	-0.0206	0.0625	0.468	0.0282	-0.107	0.0449	0.244	-0.3	-0.31	0.144	0.261	-0.237	0.0891	-0.41
5712	P02748	F7GRY2	tr|F7GRY2|F7GRY2_MACMU	C9	-0.471	0	-0.242	0.0592	-0.0296	-0.343	0.667	0.343	0.221	0.28	-0.428	0.125	-0.354	0.0287	0.372	-0.0305	-0.726	-0.131	0.158
9862	P02749	F6XLC3	tr|F6XLC3|F6XLC3_MACMU	APOH	-0.415	-0.126	0.0696	-0.155	-0.337	0	0.381	0.305	0.112	0.721	-0.397	0.0851	-0.255	-0.329	0.102	-0.124	-0.0392	0.0158	0.445
10368	P02750	F7HCV8	tr|F7HCV8|F7HCV8_MACMU	LRG1	0	-0.418	-0.315	-0.221	0.104	-0.147	0.641	0.505	0.277	0.58	-0.245	-0.471	-0.425	-0.108	0.376	0.338	-0.523	0.486	0.119
635	P02751	F7EJH1	tr|F7EJH1|F7EJH1_MACMU	FN1	-0.022	0.103	-0.28	-0.738	0	-0.0159	0.178	-0.0891	0.241	-0.855	0.0834	0.0888	-0.33	-0.00245	-0.385	0.35	0.43	0.00479	0.26
10819	P02760	F6UQI4	tr|F6UQI4|F6UQI4_MACMU	AMBP	-0.562	-0.276	0.103	0	0.125	-0.191	0.83	0.482	0.0872	0.708	-0.44	0.279	-0.236	-0.0874	0.333	-0.345	-0.375	-0.497	0.413
14068	P02763	F7H7G9	tr|F7H7G9|F7H7G9_MACMU	ORM1	-0.514	0	-0.274	0.336	-0.328	0.118	0.448	0.636	0.504	0.696	-0.366	-0.415	-0.341	-0.521	0.158	1.31	-1.48	0.513	-0.367
9957	P02765	F6WRS6	tr|F6WRS6|F6WRS6_MACMU	AHSG	-0.369	-0.493	0.208	-0.336	0.18	-0.138	0.576	0.27	0.671	0.516	-0.256	0	-0.244	-0.687	0.224	-0.179	0.766	-0.459	0.436
15014	P02766	F6VU69	tr|F6VU69|F6VU69_MACMU	TTR	-0.901	-0.156	0.15	-0.837	0.102	0.503	0.309	0.193	-0.193	0.0601	0.291	-0.565	0	-0.0996	-0.0667	-0.00106	-0.699	1.75	0.242
4920	P02768	Q28522	sp|Q28522|ALBU_MACMU	ALB	-0.179	-0.0184	0.343	-0.22	0.247	-0.0374	0.593	0.58	0.635	0.124	0	0.396	-0.386	-0.405	0.618	-0.307	0.695	-0.914	-0.0382
7112	P02774	F6WR34	tr|F6WR34|F6WR34_MACMU	GC	-0.602	-0.241	-0.12	-0.338	0.056	-0.0208	0.65	0.297	0.228	0.654	-0.412	0.0725	-0.608	-0.138	0.181	0.132	0	-0.158	0.208
15415	P02775	F6SCP6	tr|F6SCP6|F6SCP6_MACMU	PPBP	-0.156	-0.0843	0.00946	2.48	0.0911	1.13	0.328	0.445	0	0.739	-0.045	-0.19	2.29	1.38	-0.0461	-0.0519	-0.563	-0.116	-0.0687
15881	P02776	F6SCN9	tr|F6SCN9|F6SCN9_MACMU	PF4	NA	NA	NA	NA	NA	NA	NA	NA	NA	NA	NA	NA	NA	NA	NA	-0.301	0.208	-0.208	1.16
15838	P02778	Q8MIZ1	sp|Q8MIZ1|CXL10_MACMU	CXCL10	NA	NA	NA	NA	NA	NA	NA	NA	0	0.108	-0.0493	-0.29	0.701	-0.467	0.413	NA	NA	NA	NA
3318	P02786	F6UX47	tr|F6UX47|F6UX47_MACMU	TFRC	-0.112	-0.253	0.259	0.0215	-0.0601	-0.077	0.278	0.374	-0.0979	0.0406	-0.000535	0.388	-0.106	-0.178	0.26	0	0.143	0.00675	-0.0926
3928	P02787	F7DHR8	tr|F7DHR8|F7DHR8_MACMU	TF	-0.0586	0.0217	0.0042	-0.128	-0.171	-0.0741	0	-0.0498	0.181	0.0908	-0.0988	0.00454	-0.341	-0.148	-0.121	0.319	0.207	0.392	0.167
4135	P02788	F7BYZ5	tr|F7BYZ5|F7BYZ5_MACMU	LTF	-0.43	-0.484	0.649	-0.266	0	0.453	0.339	1.84	0.218	0.969	-0.00818	-0.177	-0.473	-0.503	0.715	-0.0998	-0.101	0.248	0.0278
6669	P02790	F7C9A4	tr|F7C9A4|F7C9A4_MACMU	HPX	0.0695	0.219	-0.0676	0.29	-0.278	-0.162	-0.0773	-0.103	0.135	0.114	-0.0581	0.402	0	-0.129	-0.44	0.487	-0.204	0.543	0.18
14347	P02792	F6ZV45	tr|F6ZV45|F6ZV45_MACMU	FTL	NA	NA	NA	NA	NA	NA	NA	NA	0.197	-0.0614	0.0656	0	0.0686	-0.268	0.114	-0.554	-0.232	0.0681	-0.242
14018	P02794	F6S3E9	tr|F6S3E9|F6S3E9_MACMU	FTH1	-0.153	-0.223	-0.422	-0.111	-0.122	0.396	0.0878	0.252	-0.179	0.309	0	-0.375	-0.142	0.23	0.0786	0.219	0.185	0.772	-0.12
15454	P03950	Q8WN63	sp|Q8WN63|ANGI_MACMU	ANG	-0.0285	-0.0179	0.0909	-0.121	-0.218	0.629	-0.177	-0.166	-0.198	0.193	0.194	-0.271	0.349	0.447	-0.251	0.484	0	0.819	0.444
6611	P03951	F6PJA1	tr|F6PJA1|F6PJA1_MACMU	F11	-0.386	-0.0354	0.0223	0.035	-0.131	-0.088	0.588	0.389	0.143	0.36	-0.11	0.119	-0.0947	0	0.253	-0.181	0.0156	-0.145	-0.0784
4464	P03952	F6PJA8	tr|F6PJA8|F6PJA8_MACMU	KLKB1	-0.561	-0.299	0.0957	0.231	-0.158	0	0.418	0.674	0.19	0.565	-0.161	-0.0267	-0.145	-0.189	0.607	-0.132	0.366	-0.5	0.334
15130	P03973	F6R9W4	tr|F6R9W4|F6R9W4_MACMU	SLPI	0.101	0.0653	-0.247	-0.299	0.353	-0.112	0.33	0	-0.00769	0.272	0.192	0.355	-0.406	-0.421	-0.216	-0.0798	0.58	-0.256	0.135
5106	P04003	F6RNZ2	tr|F6RNZ2|F6RNZ2_MACMU	C4BPA	-0.464	-0.287	0.142	0.653	0	-0.029	1.27	1.16	0.512	1.31	-0.31	0.444	-0.018	-0.000279	1.08	-0.338	-0.475	-0.454	1.04
6875	P04004	F6SSW9	tr|F6SSW9|F6SSW9_MACMU	VTN	-0.147	-0.136	0.0957	0.182	0.0941	-0.252	0.61	-0.0341	0.00601	0.58	-0.314	0.313	-0.0354	0.0228	0.0684	-0.215	0	-0.697	-0.286
5557	P04040	F6PLF0	tr|F6PLF0|F6PLF0_MACMU	CAT	-0.771	-0.582	-0.101	0.682	-0.0227	0.149	0	1.63	0.327	0.0704	-0.341	-0.516	-0.0622	0.435	0.335	-0.721	0.157	-0.134	0.000615
6376	P04053	F7A3Y1	tr|F7A3Y1|F7A3Y1_MACMU	DNTT	0.0749	0.0526	-0.648	-0.0526	-0.085	2.83	-0.375	0.533	NA	NA	NA	NA	NA	NA	NA	NA	NA	NA	NA
8471	P04062	F6WS88	tr|F6WS88|F6WS88_MACMU	GBA	-0.2	0.0641	-0.0423	-0.151	-0.0915	-0.000364	0.0608	0.251	0.0352	0.231	-0.149	0.201	-0.0926	0.121	-0.253	0.546	0	0.0245	-0.105
7897	P04066	F6Z3H3	tr|F6Z3H3|F6Z3H3_MACMU	FUCA1	NA	NA	NA	NA	NA	NA	NA	NA	NA	NA	NA	NA	NA	NA	NA	0.0684	-0.222	0.013	-0.013
9194	P04075	F6SYL4	tr|F6SYL4|F6SYL4_MACMU	ALDOA	0.155	0.74	0.422	0.363	0.457	-0.626	-0.518	-0.277	-0.525	0.0231	0.521	0.183	0	-0.0767	-0.306	-0.241	-0.635	-0.333	0.0264
15825	P04080	F7DLR1	tr|F7DLR1|F7DLR1_MACMU	CSTB	-0.109	-0.247	-0.477	0	0.0028	0.431	0.478	0.645	-0.542	-0.3	0.194	0.0842	0.24	0.338	0.25	-0.0266	-0.373	-0.489	-0.242
9987	P04083	F7D2H1	tr|F7D2H1|F7D2H1_MACMU	ANXA1	0.0278	0.132	-0.0339	0.324	0.0377	0.168	0	0.516	0.356	0.331	-0.267	-0.15	-0.592	-0.0841	0.163	-0.312	-0.397	-0.46	-0.208
27	P04114	F7CEU1	tr|F7CEU1|F7CEU1_MACMU	APOB	-0.469	-0.367	0.306	0.356	-0.214	-0.257	0.983	0.635	0.0743	0.652	-0.186	0.12	0	-0.111	0.325	-0.395	-0.327	-0.547	0.74
11841	P04156	P67997	sp|P67997|PRIO_MACMU	PRNP	0.329	0.000936	-0.206	-0.0583	0	-0.214	0.136	-0.177	0.107	-0.0383	-0.412	0.48	0.0707	0.324	-0.113	-0.213	-0.105	0.558	0.191
13432	P04179	Q8HXP2	sp|Q8HXP2|SODM_MACMU	SOD2	0.258	0	-0.0291	0.61	-0.0757	-0.164	-0.101	0.249	0.144	0.215	-0.159	0.0528	0.258	-0.184	0.18	-0.181	-0.0429	-0.00965	0.0183
12017	P04180	F6RNE3	tr|F6RNE3|F6RNE3_MACMU	LCAT	0	-0.523	-0.536	-0.0445	-0.0135	-0.0685	0.372	-0.0806	0.601	0.0128	-0.48	-0.493	0.321	0.744	-0.0382	0.279	0.438	0.772	0.278
5774	P04196	F6ZZL9	tr|F6ZZL9|F6ZZL9_MACMU	HRG	-0.345	-0.134	0.161	-0.372	0.222	-0.618	0.855	0.418	0.884	1.22	-0.441	0.744	-0.448	0	0.558	-0.602	-0.218	-1.03	0.357
14712	P04216	O62643	sp|O62643|THY1_MACMU	THY1	0.0943	0.158	-0.0466	0	0.0544	-0.215	-0.125	-0.2	0.154	-0.102	0.111	0.000755	-0.171	-0.222	-0.00313	-0.105	0.0583	0.213	0.00372
11669	P04217	F7FJQ0	tr|F7FJQ0|F7FJQ0_MACMU	A1BG	-0.865	-0.667	-0.28	-0.327	-0.0314	0	0.658	0.729	0.647	0.714	-0.548	0.0234	-0.827	-0.461	0.0865	0.0228	0.145	-0.604	0.562
11921	P04233	F7E9S4	tr|F7E9S4|F7E9S4_MACMU	CD74	0.058	0.268	0.276	0.105	-0.058	-0.0982	-0.165	-0.641	NA	NA	NA	NA	NA	NA	NA	NA	NA	NA	NA
4612	P04264	F7B786	tr|F7B786|F7B786_MACMU	KRT1	-0.035	0.129	0.0939	0	-0.113	0.963	-0.209	0.132	-0.0212	-0.325	0.24	-0.0185	0.791	-0.585	0.499	0.865	1.13	-0.0232	-0.0184
15873	P04271	F7ANQ9	tr|F7ANQ9|F7ANQ9_MACMU	S100B	0.28	0	0.0536	0.578	-0.167	-0.0841	0.00546	-0.101	-0.143	0.143	0.204	-0.037	0.0152	-0.432	0.0024	0.0925	-0.166	-0.11	-0.0761
98	P04275	F6WF14	tr|F6WF14|F6WF14_MACMU	VWF	-0.109	0.306	0	0.34	-0.0619	-0.0686	0.289	0.395	-0.0416	0.175	-0.00602	0.211	-0.0184	-0.101	0.0933	0.363	-0.103	0.626	-0.0383
8555	P04278	F6Z7N8	tr|F6Z7N8|F6Z7N8_MACMU	SHBG	-0.2	-0.251	0.0149	-0.309	0.0341	-0.0285	0.557	0.576	0.478	0.843	-0.383	0.0794	-0.123	-0.0983	0.361	-0.338	0.152	-0.144	0
10028	P04406	F6WJJ6	tr|F6WJJ6|F6WJJ6_MACMU	GAPDH	0.412	0.151	0.201	0.522	-0.0133	-0.029	0.0327	0.322	-0.0718	0.283	0.0434	-0.303	0	-0.13	0.112	-0.3	-0.34	-0.526	-0.38
12079	P04632	F6X8A9	tr|F6X8A9|F6X8A9_MACMU	CAPNS1	-0.0543	0.221	0.0194	0.691	-0.0403	0.109	-0.374	0.206	-0.442	0.029	0.32	-0.0549	0.106	-0.149	0.342	-0.0617	-0.00835	-0.0568	0
5721	P04746	F7GYU4	tr|F7GYU4|F7GYU4_MACMU	AMY2A	-0.381	0.311	-0.109	0.0641	0	-0.00351	0.297	0.376	-0.0977	0.138	-0.108	0.228	0.4	-0.343	-0.254	-0.288	-0.385	0.122	0.0301
13340	P04792	F6XTF7	tr|F6XTF7|F6XTF7_MACMU	HSPB1	0.528	0.444	0.108	0.696	-0.303	-0.12	-0.118	0.536	-0.199	0.411	0.239	-0.0146	0.571	0	0.258	-0.191	-0.332	-0.392	-0.0928
9375	P04899	F7GK45	tr|F7GK45|F7GK45_MACMU	GNAI2	0.364	0.134	0.0237	-0.0997	0.277	0.0501	-0.0507	-0.149	-0.208	0.0513	-0.0943	-0.032	0.512	0.131	-0.227	0.204	0	-0.248	-0.331
13671	P05019	F6VZY3	tr|F6VZY3|F6VZY3_MACMU	IGF1	-0.246	-0.427	0.0479	0.0487	-0.00215	0.213	-0.0482	0.298	-0.193	-0.224	-0.383	0.299	0.435	0	0.371	-0.172	0.23	-0.251	0.294
1607	P05023	F7HE86	tr|F7HE86|F7HE86_MACMU	ATP1A1	-0.0519	-0.0162	0.0437	0.0999	0	0.251	0.231	0.156	-0.293	0.0633	0.00347	-0.268	-0.0519	-0.23	0.151	-0.0372	0.0353	-0.00639	-0.237
4108	P05060	F6RXB4	tr|F6RXB4|F6RXB4_MACMU	CHGB	0.431	-0.207	-0.502	-0.104	-0.15	-0.137	0.184	-0.346	0.318	-0.0534	-0.523	0	0.192	0.42	-0.311	0.133	0.349	0.755	0.298
14413	P05090	F7FST1	tr|F7FST1|F7FST1_MACMU	APOD	-0.434	0.25	0.415	-0.137	0	-0.136	-0.0109	-0.438	-0.0117	-0.0313	0.106	0.837	-0.591	0.107	0.176	0.192	-0.058	0.956	0.218
3265	P05107	F6QYS6	tr|F6QYS6|F6QYS6_MACMU	ITGB2	-0.142	0.142	0.32	-0.338	0.161	-0.00572	0.136	0.35	-0.015	-0.128	0.0439	0.0755	-0.0217	-0.247	0	0.16	-0.12	0.107	-0.223
15940	P05109	F6QJD8	tr|F6QJD8|F6QJD8_MACMU	S100A8	-0.0253	-0.177	-0.00363	0	0.0691	0.36	0.0768	2.38	0.351	0.749	-0.154	-0.515	-0.0591	-0.169	0.0715	-0.193	-0.0584	0.352	0.437
15813	P05114	F7G6Z9	tr|F7G6Z9|F7G6Z9_MACMU	HMGN1	NA	NA	NA	NA	NA	NA	NA	NA	NA	NA	NA	NA	NA	NA	NA	0.356	0.149	-0.149	-0.587
8542	P05121	F6Y5D7	tr|F6Y5D7|F6Y5D7_MACMU	SERPINE1	-0.23	0.0354	0.216	-0.0155	-0.299	0.0155	-0.164	0.391	NA	NA	NA	NA	NA	NA	NA	NA	NA	NA	NA
9196	P05154	F6WYB6	tr|F6WYB6|F6WYB6_MACMU	SERPINA5	0.494	0.633	0.41	-0.437	0.217	-0.489	-0.0229	-0.155	0.188	-0.195	0.393	0.474	0	-0.148	-0.0125	0.0652	-0.269	-0.322	0.134
7052	P05155	F7F4G6	tr|F7F4G6|F7F4G6_MACMU	SERPING1	0.116	0.143	0.239	-0.0661	-0.167	-0.021	0.335	0	0.0595	0.5	0.124	0.513	-0.123	-0.0797	-0.205	-0.0894	-0.132	-0.0973	0.0158
11826	P05156	F7HTT9	tr|F7HTT9|F7HTT9_MACMU	CFI	-0.485	-0.167	0.0321	-0.135	-0.0424	-0.0384	0.542	0.616	0.189	0.402	-0.215	0.117	-0.147	-0.191	0.466	0.166	-0.187	0	0.312
3665	P05160	F6XAB8	tr|F6XAB8|F6XAB8_MACMU	F13B	-0.405	0.407	-0.0367	0.258	-0.131	-0.129	0.562	0.592	0.267	0.6	-0.155	0	0.031	-0.352	0.617	-0.00693	-0.0997	-0.499	0.397
3396	P05164	F7BAA9	tr|F7BAA9|F7BAA9_MACMU	MPO	-0.483	-0.873	0.377	-0.715	-0.0185	0.109	0.533	2.19	0.488	0.89	-0.723	-0.298	-0.672	-0.283	1.05	0.0299	-0.134	0.445	0
5647	P05166	F7DJ09	tr|F7DJ09|F7DJ09_MACMU	PCCB	NA	NA	NA	NA	NA	NA	NA	NA	NA	NA	NA	NA	NA	NA	NA	0.246	-0.612	0.17	-0.17
5816	P05186	F6W7W1	tr|F6W7W1|F6W7W1_MACMU	ALPL	-0.132	-0.206	-0.00259	-0.155	-0.155	0.329	0.0934	0.217	0.0125	-0.0373	-0.523	0.00545	-0.0206	0.219	0	0.33	0.0195	-0.00334	0.272
10720	P05198	F7EFD7	tr|F7EFD7|F7EFD7_MACMU	EIF2S1	NA	NA	NA	NA	NA	NA	NA	NA	-0.321	-0.0378	0.103	0.116	-0.0489	0	0.245	NA	NA	NA	NA
6769	P05362	Q5NKV6	sp|Q5NKV6|ICAM1_MACMU	ICAM1	-0.183	0.0797	-0.0913	0.0146	-0.115	0	-0.129	-0.0898	0.0183	-0.252	0.0832	-0.0716	-0.224	0.129	-0.164	0.971	0.0508	1.04	0.0019
15549	P05386	F6TQ53	tr|F6TQ53|F6TQ53_MACMU	RPLP1	NA	NA	NA	NA	NA	NA	NA	NA	0.315	0.2	-0.16	0.744	0.463	0.534	-0.348	0	-0.62	-0.293	-0.206
15611	P05387	F7CGS1	tr|F7CGS1|F7CGS1_MACMU	RPLP2	0.899	0.775	0.629	0.359	0.608	-0.248	-0.269	-0.131	-0.0783	-0.0184	0	0.566	-0.039	0.381	0.508	-0.0492	-0.517	0.271	-0.125
10784	P05388	F6WU88	tr|F6WU88|F6WU88_MACMU	RPLP0	NA	NA	NA	NA	NA	NA	NA	NA	0.133	0.678	-0.946	0	-1.05	-0.487	0.603	NA	NA	NA	NA
13089	P05408	F7DRU4	tr|F7DRU4|F7DRU4_MACMU	SCG5	-0.259	-0.169	-0.314	0	-0.231	0.127	0.0104	-0.184	0.0526	0.132	-0.0781	-0.292	0.0259	0.33	-0.465	0.268	-0.0277	0.681	0.161
13580	P05452	F6T0W5	tr|F6T0W5|F6T0W5_MACMU	CLEC3B	-0.277	-0.24	-0.401	0.0867	0.0715	-0.0883	0.0628	0.085	0.28	-0.153	-0.433	0.293	-0.114	0	-0.0166	0.284	0.605	-0.288	0.162
9243	P05543	F7DIN9	tr|F7DIN9|F7DIN9_MACMU	SERPINA7	-0.23	0	0.0124	-0.105	0.0975	-0.067	0.294	0.145	0.276	-0.0968	-0.179	0.267	-0.265	-0.0576	0.281	0.32	-0.233	-0.293	0.409
6560	P05546	F6XIG8	tr|F6XIG8|F6XIG8_MACMU	SERPIND1	-0.246	-0.174	-0.22	-0.476	-0.296	-0.25	0.477	0.155	0.707	0	-0.135	-0.388	0.135	0.197	-0.246	0.284	0.256	0.575	0.381
3534	P05556	F7EUQ4	tr|F7EUQ4|F7EUQ4_MACMU	ITGB1	-0.038	-0.126	-0.0283	0	-0.00483	0.0278	0.0632	0.231	-0.00468	-0.0714	-0.0769	-0.0845	-0.0639	0.0456	0.0135	0.461	0.121	0.372	0.038
12527	P05937	F7H3Y5	tr|F7H3Y5|F7H3Y5_MACMU	CALB1	0.161	-0.177	0.0319	-0.0901	0.223	-0.179	0.226	0.171	0	-0.169	0.226	0.327	0.108	-0.0485	0.119	-0.229	-0.243	-0.286	-0.242
7705	P05981	F6QHU6	tr|F6QHU6|F6QHU6_MACMU	HPN	NA	NA	NA	NA	NA	NA	NA	NA	NA	NA	NA	NA	NA	NA	NA	-0.405	0.0578	-0.0578	1.14
704	P05997	F6V6S9	tr|F6V6S9|F6V6S9_MACMU	COL5A2	-0.046	-0.276	-0.158	-0.347	0.187	0.151	0.0495	0.159	0.391	0.0635	-0.455	-0.281	0.183	-0.0231	0	-0.221	0.404	-0.0985	0.18
9712	P06132	F7HR87	tr|F7HR87|F7HR87_MACMU	UROD	NA	NA	NA	NA	NA	NA	NA	NA	0	0.217	-0.115	-0.186	0.0892	0.467	0.262	-0.226	0.0271	-0.274	-0.35
7290	P06280	F7BGG3	tr|F7BGG3|F7BGG3_MACMU	GLA	-0.007	0.211	-0.00123	-0.0441	-0.0153	0.0324	0.0411	0.0486	0.0141	0.0146	0	-0.023	0.33	-0.0621	0.0828	-0.0505	-0.00697	-0.02	0.515
16053	P06307	F6QMJ5	tr|F6QMJ5|F6QMJ5_MACMU	CCK	-0.301	0.00797	-0.298	-0.229	-0.12	0	-0.0699	0.623	-0.842	0.0353	0.138	0.466	-0.0151	0.635	-0.176	-0.169	0.576	0.869	0.107
15526	P06312	F7HU19	tr|F7HU19|F7HU19_MACMU		-0.524	-0.219	-0.26	-0.0132	0.124	0.31	0.97	0.449	0.278	0.388	-0.104	0.419	0	-0.259	0.546	-0.000525	-0.21	-0.514	1.38
2862	P06396	F7HP21	tr|F7HP21|F7HP21_MACMU	GSN	0.0336	-0.136	0.0899	-0.349	-0.31	-0.246	0	-0.0888	0.0323	-0.136	-0.051	0.0323	-0.172	0.121	-0.153	0.212	0.273	0.337	0.155
15646	P06454	F7GZS2	tr|F7GZS2|F7GZS2_MACMU	PTMA	NA	NA	NA	NA	NA	NA	NA	NA	0.089	-0.00373	0.519	-0.17	0.533	0	-0.036	NA	NA	NA	NA
6171	P06576	F7F3I6	tr|F7F3I6|F7F3I6_MACMU	ATP5B	-0.0781	-0.136	0.0363	-0.0778	0.0392	0.398	0	-0.223	0.122	0.166	-0.163	0.0345	0.105	-0.0188	0.216	0.21	-0.264	-0.334	-0.424
3107	P06681	F6YK65	tr|F6YK65|F6YK65_MACMU	C2	0.152	0.118	-0.0367	0.00892	-0.0793	-0.194	0.192	0.148	0.0804	-0.00217	0.0773	0.095	-0.123	-0.175	-0.136	0.341	0	-0.351	-0.251
15642	P06702	F7F8G8	tr|F7F8G8|F7F8G8_MACMU	S100A9	-0.645	-0.585	-0.138	-0.254	-0.0805	0.462	0.0634	2.77	0.27	0.75	-0.309	-0.185	-0.429	0	0.189	0.0925	-0.203	0.354	0.0859
15938	P06703	F7DI51	tr|F7DI51|F7DI51_MACMU	S100A6	0.0653	0.0284	-0.132	0.437	-0.27	-0.169	0.0713	0.959	0.168	0.188	-0.0037	-0.322	-0.111	-0.358	0.356	-0.227	0.191	-0.932	0
9716	P06727	F6XU42	tr|F6XU42|F6XU42_MACMU		-0.333	-0.235	-0.0626	-0.229	0	0.0731	0.672	0.464	0.929	0.127	-0.66	0.266	-0.24	0.35	-0.117	-0.0547	0.562	-0.234	0.802
5151	P06744	F6TLQ6	tr|F6TLQ6|F6TLQ6_MACMU	GPI	0.0629	0.143	0.177	0.426	0.317	-0.119	0	0.853	-0.164	0.454	0.466	-0.28	-0.127	-0.136	0.105	-0.0433	-0.391	-0.172	-0.114
11659	P06748	F7HKB2	tr|F7HKB2|F7HKB2_MACMU	NPM1	0.607	0.901	1.21	0.532	1.2	0.0919	-0.31	-0.328	NA	NA	NA	NA	NA	NA	NA	-0.0919	-0.429	-0.381	-0.23
11983	P06753	F7GS30	tr|F7GS30|F7GS30_MACMU	TPM3	0.151	0.217	0.406	0.868	0.425	-0.439	-0.335	-0.251	0	0.363	0.188	0.0916	-0.225	-0.34	0.194	-0.518	-0.502	-0.507	-0.305
13945	P06850	F7E8Q2	tr|F7E8Q2|F7E8Q2_MACMU	CRH	-0.456	-0.685	0.159	-0.408	0.0641	0.356	0.287	0.305	0.366	-0.423	-0.328	0	-0.0871	-0.235	0.278	-0.37	0.372	0.189	-0.0195
8404	P06858	F6RD28	tr|F6RD28|F6RD28_MACMU	LPL	-0.327	-0.116	0	-0.229	0.0273	0.326	-0.228	-0.104	0.00125	-0.253	-0.313	0.225	0.374	0.496	-0.141	0.151	-0.023	0.701	0.34
5474	P06865	F7GCB0	tr|F7GCB0|F7GCB0_MACMU	HEXA	0.227	-0.0652	0.0656	0.0226	0	-0.0939	-0.0269	-0.103	0.37	-0.0216	-0.0758	-0.0105	0.0307	0.133	-0.217	0.338	0.371	-0.126	0.0653
13963	P06870	F7GYN8	tr|F7GYN8|F7GYN8_MACMU	KLK1	0.0241	-0.368	-0.149	-0.0765	0.0995	0.319	0.0498	-0.00995	NA	NA	NA	NA	NA	NA	NA	-0.0756	-0.36	0.289	0.00995
8798	P07093	F7HSW0	tr|F7HSW0|F7HSW0_MACMU	SERPINE2	0.153	0	-0.0991	-0.747	-0.0453	-0.354	-0.0108	-0.212	0.000185	-0.383	-0.225	0.164	0.0946	0.0204	-0.666	0.444	0.635	0.44	0.0718
7035	P07099	F6VUG2	tr|F6VUG2|F6VUG2_MACMU	EPHX1	NA	NA	NA	NA	NA	NA	NA	NA	NA	NA	NA	NA	NA	NA	NA	0.16	-0.16	0.209	-0.667
10155	P07195	F7BCH4	tr|F7BCH4|F7BCH4_MACMU	LDHB	NA	NA	NA	NA	NA	NA	NA	NA	-0.941	-0.74	0.154	0.604	0.000304	0	-0.409	NA	NA	NA	NA
5984	P07196	F7ED68	tr|F7ED68|F7ED68_MACMU	NEFL	0.863	0.684	0.137	0.337	0	-0.538	-0.556	-0.966	-0.97	-0.196	0.651	-0.469	0.821	0.428	0.706	-0.241	-0.166	0.182	-0.546
2432	P07197	F6XT64	tr|F6XT64|F6XT64_MACMU	NEFM	0.609	0.735	0.122	0.183	0.0134	-0.362	-0.503	-0.776	-0.687	-0.299	0.934	-0.308	0.531	0.148	0.436	-0.396	-0.579	0	-0.311
14808	P07203	F7GVP7	tr|F7GVP7|F7GVP7_MACMU	GPX1	-0.118	0.0956	-0.0715	0.349	0	0.269	0.279	0.286	-0.309	0.0756	-0.16	-0.399	0.373	0.406	-0.195	-0.768	0.028	-0.905	-0.0151
8174	P07205	F7H0D2	tr|F7H0D2|F7H0D2_MACMU	PGK2	NA	NA	NA	NA	NA	NA	NA	NA	0	0.389	-0.466	0.16	-0.861	-0.213	0.613	NA	NA	NA	NA
4056	P07225	Q28520	sp|Q28520|PROS_MACMU	PROS1	0.245	-0.207	-0.0374	-0.45	-0.244	0.087	-0.0606	0	0.191	-0.149	0.186	-0.104	0.0884	-0.107	-0.0265	0.509	0.0666	0.194	0.0694
7688	P07237	F7H8I0	tr|F7H8I0|F7H8I0_MACMU	P4HB	0.0803	0.0207	-0.121	0.0478	0.0373	0.167	-0.0666	-0.23	0.0556	-0.205	-0.22	0	-0.15	0.121	-0.213	-0.059	0.183	-0.165	0.25
14051	P07305	F7DZP5	tr|F7DZP5|F7DZP5_MACMU	H1F0	-0.131	-0.0936	0.143	-0.773	0.0936	-0.17	0.535	0.359	NA	NA	NA	NA	NA	NA	NA	NA	NA	NA	NA
15845	P07311	F7DGK4	tr|F7DGK4|F7DGK4_MACMU	ACYP1	-0.0559	-0.365	-0.198	-0.33	0.0121	0.0812	-0.071	-0.0764	-0.166	0.0543	0.303	-0.501	0	0.578	-0.299	0.524	0.454	0.129	0.49
9325	P07327	P28469	sp|P28469|ADH1A_MACMU	ADH1A	NA	NA	NA	NA	NA	NA	NA	NA	-0.457	-0.0546	0.324	-0.223	0.399	-0.0488	0	0.777	0.124	1.1	-0.469
8363	P07339	F7H7Y3	tr|F7H7Y3|F7H7Y3_MACMU	CTSD	0.162	0.24	0.159	-0.213	0.248	-0.151	-0.411	-0.273	-0.0171	-0.23	0	-0.0326	0.434	0.0947	-0.237	0.724	0.297	0.00668	-0.0464
10045	P07355	F7H0C7	tr|F7H0C7|F7H0C7_MACMU	ANXA2	0.0596	0.137	-0.377	-0.238	0.143	0.431	-0.0149	0.0025	0.123	0.0954	-0.432	-0.384	-0.166	-0.285	0	0.0349	0.13	-0.253	-0.173
4948	P07357	F6U5Q9	tr|F6U5Q9|F6U5Q9_MACMU	C8A	-0.32	-0.134	0	-0.113	0.171	-0.166	0.776	0.578	0.288	0.545	-0.344	0.251	-0.15	-0.202	0.274	0.226	-0.139	-0.46	0.136
4747	P07358	F6TP36	tr|F6TP36|F6TP36_MACMU	C8B	-0.103	-0.0123	0	-0.0475	0.308	-0.282	0.775	0.512	0.336	0.721	-0.282	0.421	-0.0849	-0.122	0.309	0.349	-0.232	-0.57	0.0649
15461	P07360	F7GRA6	tr|F7GRA6|F7GRA6_MACMU	C8G	-0.306	-0.186	0.0059	-0.183	0.084	-0.189	0.408	0.227	0	0.101	-0.3	0.085	0.0571	-0.172	0.267	0.13	-0.118	-0.488	-0.0703
3464	P07384	F6ZLR4	tr|F6ZLR4|F6ZLR4_MACMU	CAPN1	0.248	-0.0669	-0.049	0.176	-0.0169	-0.0864	0	0.861	0.0475	0.168	0.0896	-0.038	0.104	0.292	0.234	-0.416	-0.0113	-0.435	-0.285
7166	P07437	P69895	sp|P69895|TBB5_MACMU	TUBB	0.774	0.414	0.121	0.842	-0.183	0.0538	0.0139	-0.105	-0.29	0.766	-0.0355	-0.259	0.209	-0.232	0.701	0	-0.469	-0.182	-0.0986
11817	P07451	F6TQ33	tr|F6TQ33|F6TQ33_MACMU	CA3	NA	NA	NA	NA	NA	NA	NA	NA	1.1	0	-0.455	-0.892	1.18	-0.409	-0.187	0.409	-0.192	0.097	1.11
15810	P07492	F6SRX2	tr|F6SRX2|F6SRX2_MACMU	GRP	-0.81	-0.0243	-0.0987	-0.179	0.349	0.988	0.215	0.0243	NA	NA	NA	NA	NA	NA	NA	NA	NA	NA	NA
9409	P07585	F6PRM5	tr|F6PRM5|F6PRM5_MACMU	DCN	0.425	-0.173	0.354	-0.00692	-0.115	0.0581	-0.156	-0.195	-0.0612	0.0158	0.00218	-0.118	0.178	-0.512	0	0.287	0.423	-0.134	0.443
5715	P07602	F7GVI7	tr|F7GVI7|F7GVI7_MACMU	PSAP	0.0925	0	-0.00168	-0.2	-0.0724	-0.145	-0.237	-0.441	0.196	-0.188	0.024	-0.151	0.2	0.211	-0.286	0.272	0.426	0.401	0.0102
5413	P07686	F7FNG8	tr|F7FNG8|F7FNG8_MACMU	HEXB	-0.101	-0.191	0.148	-0.174	0	-0.0828	0.0527	-0.000261	0.365	0.0525	0.134	-0.254	-0.0791	0.173	-0.224	0.351	0.432	-0.0043	0.254
9799	P07711	F6VSF4	tr|F6VSF4|F6VSF4_MACMU	CTSL	0.00276	-0.208	-0.113	-0.153	-0.208	0.853	-0.273	-0.195	0.13	-0.112	0	-0.258	0.0444	0.0639	-0.271	0.552	0.266	0.675	0.0327
14955	P07737	F7H2A5	tr|F7H2A5|F7H2A5_MACMU	PFN1	0.16	0.442	0	0.559	0.00225	0.0891	0.169	-0.0722	-0.305	0.00308	0.111	-0.0488	-0.27	0.0892	-0.0735	-0.176	-0.247	-0.156	-0.135
12016	P07738	F6Q944	tr|F6Q944|F6Q944_MACMU	BPGM	0.0227	0.354	-0.126	-0.151	-0.307	-0.285	0.135	0.359	0.268	0.294	-0.376	0.897	-0.385	0.118	0	-0.306	0.212	-0.0881	-0.0131
14425	P07741	F6T5C3	tr|F6T5C3|F6T5C3_MACMU	APRT	NA	NA	NA	NA	NA	NA	NA	NA	-0.546	-0.0705	0.2	-0.493	0.362	0.258	0	0.0861	-0.274	0.00631	-0.369
614	P07814	F7E161	tr|F7E161|F7E161_MACMU	EPRS	NA	NA	NA	NA	NA	NA	NA	NA	0.396	-0.187	-0.188	-0.123	0.175	-0.232	0.218	-0.273	0.294	0	0.372
9254	P07858	F6QQ66	tr|F6QQ66|F6QQ66_MACMU	CTSB	0.025	0.0434	0.705	-0.357	-0.0757	-0.216	-0.0831	0.0813	0.121	-0.0954	0.801	0.408	-0.049	0	-0.393	0.244	-0.107	0.12	-0.117
8579	P07902	F7HA02	tr|F7HA02|F7HA02_MACMU	GALT	0.223	0.0564	0	0.0441	-0.142	0.111	-0.126	0.301	-0.138	-0.245	0.0396	-0.265	0.102	-0.274	-0.00771	0.0655	-0.353	-0.521	0.0368
10986	P07910	F7GMW9	tr|F7GMW9|F7GMW9_MACMU	HNRNPC	-0.104	0.499	0.518	0.0884	0.6	-0.267	-0.405	-0.0884	NA	NA	NA	NA	NA	NA	NA	NA	NA	NA	NA
4102	P07911	F7E1R3	tr|F7E1R3|F7E1R3_MACMU	UMOD	NA	NA	NA	NA	NA	NA	NA	NA	0.308	-0.186	-0.128	0	0.0114	0.0997	-0.103	NA	NA	NA	NA
336	P07942	F7HPY4	tr|F7HPY4|F7HPY4_MACMU	LAMB1	-0.0487	-0.139	0	-0.0251	0.00561	0.138	-0.0354	-0.0435	-0.177	0.393	0.154	-0.25	-0.0254	0.0868	-0.0796	0.261	0.303	0.0654	0.0563
6344	P07954	F6VWV9	tr|F6VWV9|F6VWV9_MACMU	FH	NA	NA	NA	NA	NA	NA	NA	NA	0.263	0	0.296	-0.21	-0.297	-0.00317	-0.0399	0.444	0.199	0.235	-0.144
9124	P07988	F7DWA9	tr|F7DWA9|F7DWA9_MACMU	SFTPB	NA	NA	NA	NA	NA	NA	NA	NA	NA	NA	NA	NA	NA	NA	NA	-0.253	0.371	0.069	-0.069
915	P07996	F6WIY2	tr|F6WIY2|F6WIY2_MACMU	THBS1	-0.276	-0.34	0.227	0	0.102	0.0265	-0.116	0.068	-0.114	0.00731	0.0424	-0.161	0.415	-0.238	-0.0997	-0.0227	-0.0363	0.18	0.198
15044	P07998	Q8SPN5	sp|Q8SPN5|RNAS1_MACMU	RNASE1	-0.356	0.447	-0.267	0	-0.234	0.38	-0.0736	-0.126	0.219	-0.349	0.232	-0.317	-0.0487	0.558	-0.213	0.416	0.24	0.604	0.422
4454	P08133	F7H1Y6	tr|F7H1Y6|F7H1Y6_MACMU	ANXA6	0.13	0.141	-0.0822	-0.207	0.22	0.718	-0.127	0.437	-0.0633	0.248	0.0204	-0.488	0.129	-0.119	0.282	0	-0.154	-0.0589	-0.118
7557	P08138	F7GQ23	tr|F7GQ23|F7GQ23_MACMU	NGFR	0.118	0	-0.111	-0.41	-0.305	-0.226	-0.134	-0.126	0.0156	-0.216	0.25	0.0325	0.126	0.357	-0.223	0.549	-0.155	0.32	0.545
10846	P08174	F7HC68	tr|F7HC68|F7HC68_MACMU	CD55	0.0319	0.119	-0.125	0	-0.149	-0.0912	-0.192	-0.172	-0.0712	-0.2	0.0644	0.149	-0.0952	0.361	-0.13	0.0666	0.223	0.637	0.0925
8944	P08185	F7F6V9	tr|F7F6V9|F7F6V9_MACMU	SERPINA6	-0.449	-0.0938	0.121	-0.203	-0.000437	0	0.514	0.163	0.0197	0.0575	-0.106	0.115	-0.335	-0.234	0.396	-0.103	0.297	-0.64	0.613
3586	P08238	F7GST0	tr|F7GST0|F7GST0_MACMU	HSP90AB1	0.183	0.779	0.447	0.266	0.179	-0.0386	-0.104	0	-0.278	0.213	0.452	-0.0567	-0.0812	-0.0427	0.13	0.0666	-0.328	-0.188	-0.416
12819	P08246	F6YCH7	tr|F6YCH7|F6YCH7_MACMU	ELANE	0	-0.217	0.584	-0.237	-0.0972	0.4	0.507	2.62	-0.139	0.734	0.169	-0.121	-0.565	-0.209	1.1	0.0705	-0.212	0.367	-0.266
3535	P08253	F7GIP9	tr|F7GIP9|F7GIP9_MACMU	MMP2	-0.0299	-0.147	-0.141	-0.0243	-0.0956	0.42	-0.0278	0.0836	0.0464	0.0438	0.448	-0.286	0.163	-0.187	-0.048	0.391	0.319	0.325	0
6715	P08254	F6YVN6	tr|F6YVN6|F6YVN6_MACMU	MMP3	-0.0325	0.474	0.05	0.537	-0.135	0.157	0.889	0.508	-0.399	-0.479	0.262	0.912	-0.0796	-0.398	0.126	-0.234	-0.0885	0	-0.0103
12753	P08294	F7H9D9	tr|F7H9D9|F7H9D9_MACMU	SOD3	-0.118	0.0211	0.145	0	-0.0328	0.69	-0.383	0.203	-0.065	0.237	0.758	-0.243	0.593	-0.0581	-0.0232	0.593	0.51	-0.299	-0.0845
13015	P08311	F7GU54	tr|F7GU54|F7GU54_MACMU	CTSG	-0.489	-0.4	0.0634	0	-0.0807	0.244	0.249	2.15	-0.454	0.107	0.124	-0.509	-0.604	-0.462	0.0205	NA	NA	NA	NA
9429	P08567	F7HM67	tr|F7HM67|F7HM67_MACMU	PLEK	NA	NA	NA	NA	NA	NA	NA	NA	-0.156	-0.0187	0	-0.214	1.1	0.119	0.428	NA	NA	NA	NA
9349	P08571	B3Y6B8	tr|B3Y6B8|B3Y6B8_MACMU	CD14	0.137	0.88	0.149	-0.492	-0.169	-0.737	-0.199	0.393	0	0.0402	0.0135	0.507	-0.351	-0.3	0.000507	0.452	-0.608	-0.0749	-0.234
1238	P08575	F7HTR2	tr|F7HTR2|F7HTR2_MACMU	PTPRC	0.14	-0.607	0.551	-0.195	0.429	-0.294	0.198	0.0476	-0.378	0.043	0.188	0	-0.036	0.122	-0.0566	-0.246	-0.37	-0.0237	0.806
732	P08581	F7H1K4	tr|F7H1K4|F7H1K4_MACMU	MET	-0.206	-0.169	0.0149	0.0273	-0.112	-0.00964	0.131	0.0924	-0.0245	0.0831	-0.144	0.196	-0.0576	-0.118	0.25	0	0.0163	0.0527	-0.0529
13921	P08590	F7G4P0	tr|F7G4P0|F7G4P0_MACMU	MYL3	NA	NA	NA	NA	NA	NA	NA	NA	0	0.327	-0.172	-0.151	0.251	0.166	0.271	-0.0108	-0.139	-0.22	0.0748
12571	P08637	A3RFZ7	sp|A3RFZ7|FCGR3_MACMU	FCGR3A	-0.364	-0.249	0	-0.168	-0.116	-0.047	0.316	0.314	0.174	0.48	-0.115	0.063	-0.373	0.0956	-0.128	0.524	-0.239	0.204	0.453
8410	P08670	F7EIV0	tr|F7EIV0|F7EIV0_MACMU	VIM	-0.111	0.269	-0.154	0.91	0.0678	0.316	-0.0596	0.603	0	0.577	0.107	-0.19	0.0615	-0.0949	0.303	-0.35	-0.572	-0.281	-0.324
6876	P08697	F7BTD3	tr|F7BTD3|F7BTD3_MACMU	SERPINF2	-0.261	-0.0119	-0.034	0	0.177	-0.135	0.107	0.17	0.0727	0.653	-0.293	0	-0.266	0.0173	0.0693	0.091	-0.00222	-0.233	0.275
8665	P08709	F7HK40	tr|F7HK40|F7HK40_MACMU	F7	NA	NA	NA	NA	NA	NA	NA	NA	0.421	0	-0.13	0.248	-0.378	-0.316	0.0304	NA	NA	NA	NA
8782	P08727	F7A635	tr|F7A635|F7A635_MACMU	KRT19	-0.248	0.286	-0.148	-0.0267	-0.487	1.8	-0.595	0.277	-0.157	-0.642	0.769	-0.229	1.66	-0.908	0.611	1.26	2.21	0	0.193
11337	P08758	F7HM69	tr|F7HM69|F7HM69_MACMU	ANXA5	0.248	0.507	0	0.37	0.035	0.403	-0.144	-0.14	-0.064	0.0878	0.0018	-0.154	-0.0374	-0.193	-0.0871	-0.0226	-0.159	0.0619	0.234
7302	P08779	F6YKA7	tr|F6YKA7|F6YKA7_MACMU	KRT16	NA	NA	NA	NA	NA	NA	NA	NA	-0.217	-0.396	-0.0515	0.121	0.722	-0.768	0	0.993	0.162	0.618	-0.0228
12245	P08833	F6RF22	tr|F6RF22|F6RF22_MACMU	IGFBP1	0.159	1.21	-0.53	0.256	-0.211	0.224	-1.16	0.0448	-0.669	-0.465	-0.244	2.57	-0.167	-0.711	-0.506	0.42	0	0.277	0.611
11002	P08865	F6U6B5	tr|F6U6B5|F6U6B5_MACMU	RPSA	NA	NA	NA	NA	NA	NA	NA	NA	0.282	-0.0929	0.0856	-0.0389	0.342	0.298	0	-0.102	0.242	-0.0158	-0.0271
6813	P08887	F6U605	tr|F6U605|F6U605_MACMU	IL6R	NA	NA	NA	NA	NA	NA	NA	NA	-0.239	-0.0422	0.29	0.00309	0.175	-0.0146	0	0.343	-0.00844	0.607	-0.0379
7731	P09104	F6X1V9	tr|F6X1V9|F6X1V9_MACMU	ENO2	0.579	0.874	0.444	0.505	0.683	-0.432	-0.447	-0.812	-0.733	-0.135	1.14	0.285	0.0609	0.212	0	-0.376	-0.349	-0.315	-0.367
15131	P09105	F7C7G9	tr|F7C7G9|F7C7G9_MACMU	HBQ1	NA	NA	NA	NA	NA	NA	NA	NA	NA	NA	NA	NA	NA	NA	NA	-0.0531	0.63	0.0245	-0.0245
13434	P09211	Q28514	sp|Q28514|GSTP1_MACMU	GSTP1	0.253	0.432	0.0632	0.489	0.12	0.0205	-0.116	-0.0763	0	0.156	0.193	-0.228	-0.124	0.362	-0.218	-0.137	-0.228	-0.393	-0.129
13605	P09326	F7AH60	tr|F7AH60|F7AH60_MACMU	CD48	-0.497	-0.605	0.309	-0.121	0.515	-0.334	0.121	0.188	NA	NA	NA	NA	NA	NA	NA	NA	NA	NA	NA
15335	P09382	F7HIP9	tr|F7HIP9|F7HIP9_MACMU	LGALS1	0.488	0.386	-0.0659	0.0404	-0.238	-0.252	0.138	0.0671	-0.0677	-0.106	0.097	-0.104	0	-0.0336	0.0986	-0.0808	0.206	-0.202	0.191
12614	P09417	F7DW08	tr|F7DW08|F7DW08_MACMU	QDPR	0	-0.0128	0.133	0.371	0.169	-0.19	0.347	0.266	-0.0667	0.41	0.0491	-0.0855	0.147	-0.0235	0.0765	-0.004	-0.161	-0.176	-0.0194
15017	P09455	F7A9X9	tr|F7A9X9|F7A9X9_MACMU	RBP1	0.078	1.99	0.0124	1.03	-0.153	-0.056	-0.212	-0.338	0.072	0.335	0.398	-0.164	-0.162	-0.031	0.0719	0.306	-0.0877	0	-0.0412
10100	P09467	F6YGC3	tr|F6YGC3|F6YGC3_MACMU	FBP1	-0.425	-0.497	0.0162	-0.488	0.148	0.256	-0.223	0.359	0.505	0.524	-0.51	0.242	0	-0.744	-0.331	-0.0654	-0.311	0.176	0.334
10590	P09486	F7GQU8	tr|F7GQU8|F7GQU8_MACMU	SPARC	-0.0442	-0.14	-0.111	-0.0306	-0.0832	0.421	-0.112	0.111	0	-0.196	0.0884	-0.363	0.484	0.381	-0.0271	0.268	0.291	0.595	0.329
13698	P09488	F7HNH7	tr|F7HNH7|F7HNH7_MACMU	GSTM1	1.61	0.876	0.491	1.43	-0.245	-0.218	-0.0826	-0.77	-0.577	0	0.951	-1.3	1.49	0.0786	-0.457	1.72	0.211	-0.223	-0.618
12745	P09496	F7AZ71	tr|F7AZ71|F7AZ71_MACMU	CLTA	0.288	0.314	0.151	0.657	-0.0265	0.00165	0.0598	-0.282	0.273	0	-0.285	-0.0883	0.041	-0.404	0.266	-0.019	-0.046	-0.353	-0.199
14399	P09497	F7F718	tr|F7F718|F7F718_MACMU	CLTB	1.85	0.476	0.642	0.301	0.445	-0.878	-0.835	-0.741	-0.452	-0.301	0.257	0.521	0.397	0.0166	0	-0.305	-0.176	-0.327	-0.00154
10717	P09525	F6TG27	tr|F6TG27|F6TG27_MACMU	ANXA4	NA	NA	NA	NA	NA	NA	NA	NA	0.0635	0.322	-0.0839	-0.14	-0.13	-0.0431	0.0752	-0.0616	0.109	0	0.364
5857	P09603	F7HQ08	tr|F7HQ08|F7HQ08_MACMU	CSF1	-0.0926	-0.124	0.0861	-0.0127	-0.0159	0.683	0.168	0.463	1.48	-0.134	0.765	0.334	-1.53	0	-0.545	0.196	-0.0943	0.306	-0.285
1341	P09619	F7BTH1	tr|F7BTH1|F7BTH1_MACMU	PDGFRB	-0.0313	-0.0273	-0.19	0	-0.1	0.0582	-0.0644	-0.0781	0.321	-0.218	0.404	0.0551	-0.138	-0.0205	0.172	0.202	0.103	0.454	0.102
6155	P09622	F7HRR6	tr|F7HRR6|F7HRR6_MACMU	DLD	0.338	0.0407	-0.0525	0.208	0.0789	-0.142	-0.26	-0.118	-0.33	-0.0757	0.158	0.239	0.0474	0	-0.35	0.344	-0.193	0.241	-0.451
9658	P09668	F6R7P5	tr|F6R7P5|F6R7P5_MACMU	CTSH	0.31	0.0603	0.0307	-0.201	0	0.258	-0.0629	-0.153	0.527	0.193	0.98	-0.254	0.0281	-0.321	-0.0134	-0.262	0.0122	-0.397	-0.347
3645	P09871	F7EI47	tr|F7EI47|F7EI47_MACMU	C1S	-0.0622	0.241	0.153	-0.195	-0.072	0.17	-0.0831	0.0253	0.0864	-0.0813	0.454	0	-0.174	-0.0614	-0.113	0.387	-0.173	0.0228	0.0195
13076	P09936	F7H5G4	tr|F7H5G4|F7H5G4_MACMU	UCHL1	0.936	0.486	0.454	0.937	0.294	-0.513	-0.707	-1.12	-0.969	0.182	1.19	-0.552	0.0723	-0.0478	0.551	0	-0.788	-0.612	-0.619
4744	P09960	F7H193	tr|F7H193|F7H193_MACMU	LTA4H	-0.103	0.116	0.231	0.0711	0.312	-0.156	0.348	0.976	0	0.553	0.143	-0.00569	-0.204	-0.0691	0.36	-0.106	-0.151	-0.0195	-0.0624
9266	P09972	F6WHL1	tr|F6WHL1|F6WHL1_MACMU	ALDOC	0.0405	0.807	-0.0684	0.38	0.387	-0.335	-0.14	-0.397	-0.562	-0.00892	0.5	0.203	0.136	0	-0.0583	0.261	-0.53	-0.151	0.191
1608	P0C0L4	H9H2P7	tr|H9H2P7|H9H2P7_MACMU	C4A	0.252	0.142	0.266	-0.311	-0.0733	-0.0796	-0.157	0.0954	-0.0538	-0.386	0.311	0.651	0.115	-0.01	0	0.249	-0.609	-0.581	0.135
13522	P0C2W7	F7F4F1	tr|F7F4F1|F7F4F1_MACMU	CT47B1	NA	NA	NA	NA	NA	NA	NA	NA	NA	NA	NA	NA	NA	NA	NA	0.368	-0.213	0.213	-0.737
7207	P0C6S8	F7ELY7	tr|F7ELY7|F7ELY7_MACMU	LINGO3	NA	NA	NA	NA	NA	NA	NA	NA	0.158	0.0222	-0.409	-0.0846	-0.145	0.387	-0.109	-0.145	0.4	0.488	0
3052	P0C869	F7HAF3	tr|F7HAF3|F7HAF3_MACMU	JMJD7-PLA2G4B	0.113	0.029	-0.0267	-0.241	-0.178	0.21	0.00388	-0.00388	NA	NA	NA	NA	NA	NA	NA	NA	NA	NA	NA
13020	P0CG30	G8F1C9	tr|G8F1C9|G8F1C9_MACMU	GSTT2B	-0.137	0.5	-0.0289	0.544	0.0402	0.0289	0.185	0.152	NA	NA	NA	NA	NA	NA	NA	-0.642	-0.428	-0.748	-0.205
15136	P0CW22	F6U8N3	tr|F6U8N3|F6U8N3_MACMU		0.192	0.756	-1.01	0.0681	-0.185	1.59	-0.0681	-0.48	NA	NA	NA	NA	NA	NA	NA	NA	NA	NA	NA
8964	P0DJD7	P11489	sp|P11489|PEPA_MACMU	PGA4	0.155	-0.499	0.833	-0.302	0.278	-0.16	0.682	-0.225	2.15	0.259	0.241	-0.394	0.757	-0.572	-0.252	-0.0529	0	-0.429	0.618
15654	P0DJI8	F6V9P6	tr|F6V9P6|F6V9P6_MACMU	SAA1	1.53	-0.503	0	1.04	0.588	0.0861	0.536	-0.138	-0.0448	-0.141	-0.5	0.868	0.153	-0.0347	-0.161	0.455	-0.191	0.397	-0.313
14599	P0DKB5	F6UMK6	tr|F6UMK6|F6UMK6_MACMU	TPBGL	NA	NA	NA	NA	NA	NA	NA	NA	0.0572	-0.0861	0.0479	0	0.0959	-0.465	0.372	-0.205	-0.594	0.386	-0.261
3546	P10074	F7EDH8	tr|F7EDH8|F7EDH8_MACMU	ZBTB48	NA	NA	NA	NA	NA	NA	NA	NA	0.221	0.144	-0.49	0	-0.00376	-0.277	0.64	NA	NA	NA	NA
15495	P10092	F6US88	tr|F6US88|F6US88_MACMU	CALCB	-0.0788	-0.12	0	-0.00594	-0.0643	0.426	0.479	0.33	0.538	-0.213	0.192	0.268	-0.571	-0.304	0.43	-0.00202	0.421	-0.453	0.116
14930	P10124	F6Z655	tr|F6Z655|F6Z655_MACMU	SRGN	0	0.152	0.857	0.277	-0.0737	-0.0803	-0.195	0.166	0.238	-0.0225	0.212	0.33	-0.00316	-0.399	-0.508	0.703	-0.288	0.339	-0.00666
2018	P10253	F7AD90	tr|F7AD90|F7AD90_MACMU	GAA	-0.124	-0.207	-0.217	-0.356	-0.117	0.168	0.0587	-0.0739	0.0732	-0.256	0.223	-0.611	0.174	0	-0.185	0.285	0.394	0.341	0.089
13509	P10412	F7HAN9	tr|F7HAN9|F7HAN9_MACMU	HIST1H1E	-1.36	-0.61	-0.00956	-0.499	1.15	2.62	0.00956	1.01	NA	NA	NA	NA	NA	NA	NA	NA	NA	NA	NA
10980	P10451	F6V2X3	tr|F6V2X3|F6V2X3_MACMU	SPP1	0.251	0.412	0.418	-0.222	0.168	-0.0186	-0.204	-0.372	-0.307	-0.279	0.339	0.214	0.235	-0.291	-0.473	0.327	0	0.286	-0.202
4237	P10515	F6ZQ28	tr|F6ZQ28|F6ZQ28_MACMU	DLAT	-0.103	0.028	0.137	-0.0225	0.0225	-0.416	0.0962	-0.195	NA	NA	NA	NA	NA	NA	NA	0.191	-0.438	0.0453	-0.496
15672	P10599	P29451	sp|P29451|THIO_MACMU	TXN	0.402	0.53	0.214	0.427	0.0278	-0.387	-0.342	0.0835	-0.521	-0.108	0.368	0	-0.147	0.0247	-0.129	-0.393	0.00306	-0.0789	-0.286
7741	P10600	F7HDK4	tr|F7HDK4|F7HDK4_MACMU	TGFB3	-0.17	-0.17	-0.377	0.17	-0.538	0.534	0.238	0.427	NA	NA	NA	NA	NA	NA	NA	NA	NA	NA	NA
6526	P10619	F7G1E1	tr|F7G1E1|F7G1E1_MACMU	CTSA	0.229	0.208	0.138	-0.316	-0.11	0.247	-0.293	-0.0994	0.148	0.12	0.106	-0.0208	0.144	0	-0.157	0.556	-0.0426	-0.449	-0.245
2327	P10643	F7ALN6	tr|F7ALN6|F7ALN6_MACMU	C7	0.274	0.0968	0.0949	-0.281	-0.0368	-0.376	-0.0657	0.102	0.0139	0.175	0.338	0	-0.24	-0.0895	-0.145	0.0829	-0.383	0.0754	-0.361
8955	P10644	F6WM87	tr|F6WM87|F6WM87_MACMU	PRKAR1A	0.281	0.349	0	0.0549	0.211	-0.275	-0.0668	-0.248	-0.406	0.0127	-0.0464	-0.128	0.0652	0.0505	0.351	-0.178	-0.0944	-0.0348	0.117
7920	P10645	F6RAA1	tr|F6RAA1|F6RAA1_MACMU	CHGA	0.771	0.74	-0.319	0.245	-0.0614	-0.454	-0.192	-0.451	-0.235	-0.13	-0.0378	1.21	0.147	0.442	-0.412	0	0.216	1.01	0.154
10777	P10646	Q28864	sp|Q28864|TFPI1_MACMU	TFPI	-0.548	-0.581	-0.2	0.44	-0.128	0.124	-0.0992	-0.0279	0	-0.101	0.00736	-0.198	0.207	0.12	-0.379	0.179	0.166	0.0574	0.167
1749	P10721	F6V858	tr|F6V858|F6V858_MACMU	KIT	-0.0285	0.0738	-0.0608	-0.0285	0.157	-0.00981	-0.0118	0.177	-0.00158	0	-0.125	0.246	0.0975	0.134	-0.128	-0.0906	0.239	0.515	0.124
1123	P10745	F7HMX2	tr|F7HMX2|F7HMX2_MACMU	RBP3	0.129	-0.000862	0.105	0.251	0.17	-0.598	-0.083	-0.146	0.354	0.0245	-0.242	-0.102	-0.0351	0	0.383	-0.446	-0.221	0.279	0.249
11220	P10768	F6Z3Y0	tr|F6Z3Y0|F6Z3Y0_MACMU	ESD	0.218	0.475	0.074	0.71	0.0477	-0.0528	-0.162	-0.223	-0.352	0.296	0	-0.0876	0.594	0.0714	-0.195	0.0029	-0.18	-0.182	-0.232
5471	P10809	F7BGB7	tr|F7BGB7|F7BGB7_MACMU	HSPD1	0.111	0.032	-0.444	-0.388	0.121	0.163	-0.159	-0.269	0.381	-0.231	-0.372	0.143	0.0543	-0.393	0.297	0.365	-0.147	0	-0.466
9050	P10915	F7C5P6	tr|F7C5P6|F7C5P6_MACMU	HAPLN1	-0.0762	-0.0595	1.58	-0.122	0.93	-0.352	-0.276	-0.325	0.267	-0.0788	0.237	1.03	-0.0147	0.0672	0	0.082	0.0519	0.547	-0.0358
14533	P10916	F7C5K1	tr|F7C5K1|F7C5K1_MACMU	MYL2	NA	NA	NA	NA	NA	NA	NA	NA	0.752	-0.488	-0.0829	0.533	0.848	0.19	0	-0.698	-0.432	-0.657	0.429
4192	P11021	F7C3R1	tr|F7C3R1|F7C3R1_MACMU	HSPA5	-0.0812	0.08	-0.0815	0.0326	0.0897	-0.0295	-0.023	-0.125	-0.0198	-0.0309	0.0223	0.0348	0.07	0.128	-0.17	0.107	0	0.188	-0.0807
479	P11047	F6WVB2	tr|F6WVB2|F6WVB2_MACMU	LAMC1	-0.152	-0.134	-0.0117	-0.062	0	0.0789	-0.0399	0.189	0.119	-0.0416	-0.149	0.0141	-0.0814	0.0615	-0.0688	0.232	0.293	0.222	0.0532
7726	P11117	F6TCU1	tr|F6TCU1|F6TCU1_MACMU	ACP2	-0.278	-0.24	0.0376	-0.308	0.108	-0.0376	0.219	0.173	NA	NA	NA	NA	NA	NA	NA	NA	NA	NA	NA
4236	P11142	F6RLH5	tr|F6RLH5|F6RLH5_MACMU	HSPA8	0.612	0.639	0.39	0.66	0.348	-0.0552	-0.268	-0.153	-0.499	0	0.448	-0.0235	0.163	0.292	0.123	-0.00929	-0.141	-0.156	-0.0704
3839	P11171	F6WEM9	tr|F6WEM9|F6WEM9_MACMU	EPB41	0.0202	0.0742	0	-0.364	-0.0663	-0.0769	0.0673	0.17	-0.547	-0.0501	-0.0763	0.0925	0.333	0.362	0.0464	-0.421	0.249	-0.136	-0.171
9305	P11177	F6R4J1	tr|F6R4J1|F6R4J1_MACMU	PDHB	NA	NA	NA	NA	NA	NA	NA	NA	NA	NA	NA	NA	NA	NA	NA	0.515	0.0566	-0.0566	-0.487
2401	P11216	F7HK11	tr|F7HK11|F7HK11_MACMU	PYGB	0.402	0.54	0.275	0.963	-0.000571	0.0046	-0.144	-0.0169	-0.147	0.48	0.204	-0.116	0.278	-0.158	0.607	0	-0.325	-0.219	-0.185
2399	P11217	F6Z728	tr|F6Z728|F6Z728_MACMU	PYGM	0.499	0.0846	0.157	0.395	-0.388	-0.224	0.0138	0.333	-0.113	0	-0.076	-0.36	0.184	-0.337	0.676	0.016	-0.397	-0.326	-0.133
12764	P11226	F6T8T5	tr|F6T8T5|F6T8T5_MACMU	MBL2	-0.654	-0.883	0.0168	0.0267	-0.27	0.307	1.11	0.698	0.235	0.311	-0.134	-0.163	0	-0.0712	0.48	-0.509	-0.0115	-0.66	0.037
248	P11277	F6SKK1	tr|F6SKK1|F6SKK1_MACMU	SPTB	-0.551	-0.337	0.406	-0.254	0.123	-0.146	0.175	0.325	0.137	0.35	-0.663	-0.41	0	0.817	-0.221	-0.578	0.784	-0.525	0.214
8473	P11279	F6Y0V7	tr|F6Y0V7|F6Y0V7_MACMU	LAMP1	0.0751	-0.203	-0.079	-0.157	-0.0858	0.0298	-0.134	-0.243	0.464	-0.476	0.149	-0.388	0	0.167	-0.2	0.245	0.391	0.0629	0.182
8231	P11310	F7EKG6	tr|F7EKG6|F7EKG6_MACMU	ACADM	NA	NA	NA	NA	NA	NA	NA	NA	-0.339	-0.506	0	0.00686	0.191	-0.474	-0.476	1.07	0.155	0.243	-0.67
5998	P11413	F7HRU0	tr|F7HRU0|F7HRU0_MACMU	G6PD	NA	NA	NA	NA	NA	NA	NA	NA	0.162	0.742	0.321	-0.225	0	0.462	-0.0114	0.0191	-0.33	-0.164	-0.185
7763	P11473	F7HFI3	tr|F7HFI3|F7HFI3_MACMU	VDR	-1.04	-0.466	0.596	-0.213	-0.493	0.488	1.37	0.199	0	0.565	-0.0393	-0.239	0.19	-0.526	0.313	NA	NA	NA	NA
1131	P11498	F6SC45	tr|F6SC45|F6SC45_MACMU	PC	NA	NA	NA	NA	NA	NA	NA	NA	NA	NA	NA	NA	NA	NA	NA	0.0325	-0.35	0.0289	-0.0289
7348	P11597	F6WSG1	tr|F6WSG1|F6WSG1_MACMU	CETP	-0.201	-0.316	-0.0379	-0.432	0.111	-0.313	0.153	0.262	0.137	0.609	-0.309	0.0395	-0.209	0.0586	0.0908	-0.845	0	-1.1	0.0402
3699	P11678	F7H275	tr|F7H275|F7H275_MACMU	EPX	-0.317	-0.136	0.218	-0.212	2.13	-0.0347	0.438	0.231	-0.238	0.184	0.119	0.955	0.505	0.901	-0.0203	-0.267	0	-0.107	-0.00403
147	P11717	F7AJI7	tr|F7AJI7|F7AJI7_MACMU	IGF2R	0.0146	-0.137	-0.068	0.0958	-0.0688	0.0193	0.00277	0.164	-0.0272	0.0927	-0.239	0.0259	-0.26	-0.0831	-0.113	0.112	-0.221	0.29	0
4285	P11940	F7BM39	tr|F7BM39|F7BM39_MACMU	PABPC1	-0.00537	0	-0.00601	-0.0768	-0.0208	0.342	0.0834	-0.021	0.163	-0.395	0.185	0.249	0.0351	-0.288	0.322	-0.0842	-0.164	5.76e-05	0.0386
12247	P12004	F6ZD63	tr|F6ZD63|F6ZD63_MACMU	PCNA	NA	NA	NA	NA	NA	NA	NA	NA	NA	NA	NA	NA	NA	NA	NA	-0.119	0.223	-0.0626	0.0626
4220	P12036	F6T0J7	tr|F6T0J7|F6T0J7_MACMU	NEFH	0.89	0.827	0.317	0.19	0	-0.44	-0.774	-0.914	-1.58	-0.0944	1.27	-0.324	1.28	0.589	0.959	-0.316	-0.344	0.335	-0.145
1800	P12109	F6ZXR6	tr|F6ZXR6|F6ZXR6_MACMU	COL6A1	0.113	-0.066	-0.0183	-0.324	-0.124	0.151	-0.0101	0.199	0.229	-0.0215	0.298	-0.199	-0.14	0.146	0	0.226	-0.00331	0.28	0.0328
1638	P12110	F6XD59	tr|F6XD59|F6XD59_MACMU	COL6A2	-0.0289	0.0577	0	-0.0766	-0.288	0.134	-0.31	0.00817	-0.0465	-0.404	0.00769	-0.274	-0.229	-0.0727	0.00448	0.24	0.285	0.186	0.02
90	P12111	F7AG82	tr|F7AG82|F7AG82_MACMU	COL6A3	-0.249	-0.119	-0.184	-0.146	-0.0999	0.0317	0.0116	0.0259	0.0279	-0.145	-0.429	0.0811	-0.302	0.0287	0.0479	0	0.107	-0.0564	0.0486
10919	P12235	F6QA37	tr|F6QA37|F6QA37_MACMU	SLC25A4	0.545	0.0669	-0.0669	-0.67	-0.221	0.515	-0.287	0.137	NA	NA	NA	NA	NA	NA	NA	NA	NA	NA	NA
15951	P12273	F6UMA2	tr|F6UMA2|F6UMA2_MACMU	PIP	NA	NA	NA	NA	NA	NA	NA	NA	NA	NA	NA	NA	NA	NA	NA	2.2	-0.0826	-0.179	0.0826
8620	P12277	F6Y4T3	tr|F6Y4T3|F6Y4T3_MACMU	CKB	0.915	0.919	0.476	1.06	0.0289	-0.111	-0.408	-0.591	-0.931	0.366	0.466	-0.354	0.474	0	0.937	-0.00125	-0.798	-0.5	-0.441
9626	P12314	F7FV15	tr|F7FV15|F7FV15_MACMU	FCGR1A	-0.354	0.232	-0.198	0.0955	-0.0955	0.261	0.148	-0.202	NA	NA	NA	NA	NA	NA	NA	NA	NA	NA	NA
10786	P12429	F6Z8Y2	tr|F6Z8Y2|F6Z8Y2_MACMU	ANXA3	-0.497	-0.108	-0.363	-0.182	0	0.48	0.158	3.03	0.445	0.344	0.0994	-0.264	-0.00691	-0.459	0.636	-0.55	-0.303	0.585	1.01
7923	P12532	F7B6Y1	tr|F7B6Y1|F7B6Y1_MACMU	CKMT1A	0.465	0.369	0.42	0.719	0.552	-0.467	-0.348	-0.468	-0.628	-0.11	0.874	0.883	0.0424	-0.275	0	-0.896	-0.184	-0.5	0.601
7022	P12645	F6R9A9	tr|F6R9A9|F6R9A9_MACMU	BMP3	NA	NA	NA	NA	NA	NA	NA	NA	0	0.0469	0.157	-0.282	-1.25	-0.859	0.425	NA	NA	NA	NA
2319	P12814	F7GV42	tr|F7GV42|F7GV42_MACMU	ACTN1	-0.086	0.0468	0	0.333	0.088	0.0433	-0.129	0.836	-0.139	0.314	-0.124	-0.166	0.0779	-0.0226	0.00591	-1.32	0.381	-1.15	-0.0449
931	P12821	F7F5D8	tr|F7F5D8|F7F5D8_MACMU	ACE	-0.0645	-0.206	-0.212	-0.229	0.0988	-0.333	0.265	0.158	0.0731	-0.184	-0.0907	0	-0.234	0.108	-0.261	0.172	0.169	0.299	0.0882
473	P12883	F7G0R4	tr|F7G0R4|F7G0R4_MACMU	MYH7	-0.39	-0.27	-0.102	-0.136	0	0.342	0.22	0.232	0.32	0.708	-0.359	0.206	0.398	-0.307	1.06	-0.132	-0.309	0.0256	-0.0291
6703	P12955	F7AZD4	tr|F7AZD4|F7AZD4_MACMU	PEPD	-0.0534	0.177	0.227	0.37	0.0947	0.0207	0.41	-0.053	-0.206	0	0.435	0.462	-0.158	-0.0896	0.111	-0.182	-0.345	-0.087	-0.261
8434	P13010	F6TSQ5	tr|F6TSQ5|F6TSQ5_MACMU	XRCC5	NA	NA	NA	NA	NA	NA	NA	NA	-0.126	0.226	0.0484	0.111	-0.235	0	0.0225	-0.0294	-0.248	0.251	-0.423
12590	P13284	F6Z5T3	tr|F6Z5T3|F6Z5T3_MACMU	IFI30	-0.368	-0.181	0.0803	0.109	0.0802	-0.137	-0.0433	0.133	0.213	0.359	-0.186	-0.00922	-0.186	-0.131	0.0967	0.143	0.129	0	-0.144
7630	P13489	F7CA88	tr|F7CA88|F7CA88_MACMU	RNH1	0.358	0.535	0.17	0.379	0.175	-0.135	-0.179	-0.172	-0.311	0.174	0.403	0.111	-0.0424	0.0169	0	-0.0461	-0.284	-0.162	-0.249
1521	P13497	F7HAA9	tr|F7HAA9|F7HAA9_MACMU	BMP1	-0.087	-0.225	-0.274	-0.157	-0.245	0.131	-0.0935	0.115	0	-0.0573	-0.21	-0.0993	0.0365	0.15	0.133	0.173	0.0321	0.452	0.222
4629	P13521	F6ZTY9	tr|F6ZTY9|F6ZTY9_MACMU	SCG2	0.231	0	-0.383	-0.165	-0.387	-0.224	0.0546	0.0179	0.0857	-0.087	-0.596	0.0369	0.141	0.353	-0.126	-0.344	-0.0327	0.233	0.225
461	P13533	F7G124	tr|F7G124|F7G124_MACMU	MYH6	0	0.46	0.183	-0.617	0.259	0.444	-0.137	0.558	2.43	1.98	-1.17	-0.00763	0.21	-0.155	1.24	-0.466	-0.53	-0.265	-0.138
2474	P13591	F6RM33	tr|F6RM33|F6RM33_MACMU	NCAM1	0.486	0.0729	-0.109	0.0417	-0.0728	-0.44	-0.0829	-0.474	0.0412	0.0291	-0.226	0.203	0.044	0.16	-0.287	-0.123	0	0.311	-0.0576
12787	P13598	F7FYU5	tr|F7FYU5|F7FYU5_MACMU	ICAM2	-0.0804	-0.133	0.0527	0.063	0	-0.226	0.176	0.0589	-0.162	0.0295	-0.203	-0.086	-0.0418	-0.266	0.231	-0.0163	0.477	0.141	0.352
61	P13611	F7C5T5	tr|F7C5T5|F7C5T5_MACMU	VCAN	-0.257	-0.264	0.39	-0.0883	0.343	-0.167	0.297	-0.0346	0.354	0.0236	0.0311	0	-0.329	-0.0218	-0.0497	0.265	0.0465	0.469	-0.0567
2357	P13639	F7GC25	tr|F7GC25|F7GC25_MACMU	EEF2	-0.0852	0.281	0.0778	0.497	0.188	0.228	-0.0177	0.169	-0.38	0.0809	0	-0.322	0.0451	-0.115	0.0316	-0.141	-0.241	-0.25	-0.203
5722	P13645	F7B5E6	tr|F7B5E6|F7B5E6_MACMU	KRT10	-0.0843	0.122	-0.0192	-0.191	-0.292	1.01	-0.0854	0.123	-0.0348	-0.322	0.511	-0.0853	1.24	-0.552	0.417	0.745	1.78	0	0.23
5090	P13647	F7HGY2	tr|F7HGY2|F7HGY2_MACMU	KRT5	-0.222	0.295	-0.288	0	-0.178	0.845	-0.361	-0.201	-0.237	-0.263	0.146	-0.103	0.492	-0.566	0.255	0.906	0.947	0.196	0.0115
1851	P13671	F7HG52	tr|F7HG52|F7HG52_MACMU	C6	-0.245	-0.0359	0.159	-0.00172	0.229	-0.109	0.734	0.565	0.0594	0.631	-0.239	0.194	-0.0324	-0.068	0.555	0	-0.384	-0.0103	0.465
11336	P13716	F7GY51	tr|F7GY51|F7GY51_MACMU	ALAD	NA	NA	NA	NA	NA	NA	NA	NA	0	0.306	0.32	-0.399	0.558	0.542	-0.0467	-0.365	-0.649	-0.89	0.0147
10506	P13747	F7GQK4	tr|F7GQK4|F7GQK4_MACMU	HLA-E	-0.244	0.481	-0.202	-0.173	-0.0855	0.391	0.147	0.423	-0.04	0	-0.0128	-0.154	0.4	0.64	0.382	-0.292	-0.323	0.103	0.161
4361	P13796	F7HQU5	tr|F7HQU5|F7HQU5_MACMU	LCP1	0.00693	-0.0581	0.405	-0.0336	0.5	0.376	0.448	1.82	0.355	1.31	-0.0569	0	-0.316	-0.0479	0.65	-0.211	-0.141	-0.0538	-0.145
4299	P13797	F7GYM9	tr|F7GYM9|F7GYM9_MACMU	PLS3	0	-0.0891	0.345	-0.276	0.366	0.231	0.297	1.7	0.397	0.893	-0.122	-0.207	-0.423	-0.176	0.611	-0.149	0.0327	-0.147	-0.225
3190	P13798	F7G744	tr|F7G744|F7G744_MACMU	APEH	-0.0942	-0.0982	0.0836	0.726	0.0131	0.175	0.174	0.136	0	-0.159	-0.0728	-0.0461	0.418	0.363	-0.157	-0.364	0.257	-0.438	-0.0345
10477	P13804	F7GP40	tr|F7GP40|F7GP40_MACMU	ETFA	NA	NA	NA	NA	NA	NA	NA	NA	-0.273	-0.326	0.296	0.000484	0.129	-0.549	0.194	0.568	0	-0.0612	-0.587
15408	P13987	F6QCT1	tr|F6QCT1|F6QCT1_MACMU	CD59	0.0585	-0.144	-0.183	-0.205	-0.103	-0.0972	0.0815	0	-0.0507	-0.0895	0.138	0.0937	-0.0862	0.289	-0.209	0.46	0.306	0.864	0.233
11938	P14136	F6ZNF3	tr|F6ZNF3|F6ZNF3_MACMU	GFAP	-0.0115	0.25	0.0613	-0.0366	0.092	0.0272	0.582	-0.206	-0.00011	0.223	-0.00432	0.259	0.142	0.152	-0.0405	0	-0.473	-0.0709	-0.0621
12851	P14138	F7FQK2	tr|F7FQK2|F7FQK2_MACMU	EDN3	-0.274	-0.396	-0.427	0	-0.255	0.719	-0.000645	-0.175	0.242	-0.217	0.134	-0.39	0.291	0.328	-0.0231	0.477	0.571	0.344	0.335
8560	P14151	Q95198	sp|Q95198|LYAM1_MACMU	SELL	-0.271	0	0.876	0.287	0.0201	0.22	-0.0382	0.305	-0.353	0.0626	-0.211	0.453	-0.167	-0.352	0.171	-0.418	-0.127	-0.242	0.0981
15477	P14174	Q6DN04	sp|Q6DN04|MIF_MACMU	MIF	0.922	0.849	0.497	0.326	0.508	-0.556	-0.571	-0.56	-0.945	0.034	1.13	0.107	0	0.37	-0.227	-0.373	-0.25	-0.376	-0.704
11711	P14207	F7CR90	tr|F7CR90|F7CR90_MACMU	FOLR2	0.0334	0.135	-0.0803	0	-0.0655	-0.217	0.397	-0.0783	0.257	0.0445	0.0143	-0.134	-0.0298	0.12	0.266	-0.435	0.325	-0.683	-0.0653
14739	P14209	F6ZS69	tr|F6ZS69|F6ZS69_MACMU	CD99	0.0127	-0.0646	-0.122	-0.316	-0.168	-0.201	0.088	-0.187	0.0204	-0.0684	0	0.0249	-0.301	0.00813	-0.0793	0.057	0.0722	0.0763	0.224
2892	P14210	F7A5G3	tr|F7A5G3|F7A5G3_MACMU	HGF	NA	NA	NA	NA	NA	NA	NA	NA	NA	NA	NA	NA	NA	NA	NA	0.0198	-0.0198	0.355	-0.265
6863	P14314	F7C6C6	tr|F7C6C6|F7C6C6_MACMU	PRKCSH	0.114	0.0757	-0.0549	0.131	0.0789	-0.409	-0.148	-0.227	-0.0545	-0.226	-0.171	0.248	0	0.258	-0.369	0.177	0.107	0.475	-0.0532
6961	P14317	F7FS66	tr|F7FS66|F7FS66_MACMU	HCLS1	NA	NA	NA	NA	NA	NA	NA	NA	0.149	0.429	0	0.0183	-0.211	0.164	-0.00603	-0.332	-0.21	0.112	-0.129
8303	P14384	F6QYY5	tr|F6QYY5|F6QYY5_MACMU	CPM	0.0974	0.157	-0.0112	-0.0922	0.135	0.145	-0.0758	-0.128	0.0275	0	-0.254	-0.0422	-0.119	0.269	-0.0205	0.0894	0.287	0.333	-0.0234
11492	P14415	F6XWE3	tr|F6XWE3|F6XWE3_MACMU	ATP1B2	-0.159	0	-0.164	0.0165	-0.286	0.141	0.0788	-0.123	-0.0775	-0.163	-0.15	-0.0136	0.00371	-0.195	0.0944	0.416	0.158	0.383	0.185
890	P14543	F7DF16	tr|F7DF16|F7DF16_MACMU	NID1	0.295	-0.363	-0.396	-0.25	0.032	-0.401	0.0806	-0.0534	0.227	-0.122	-0.138	-0.407	0	0.148	-0.0272	0.0378	0.636	0.18	0.289
10068	P14550	G7MGP9	tr|G7MGP9|G7MGP9_MACMU	AKR1A1	0.186	0.377	0.276	0.539	0.115	0.0626	-0.176	-0.112	-0.194	-0.00708	0.0904	0.0476	0.543	-0.202	0	-0.191	-0.195	-0.221	-0.109
8720	P14598	F6SL33	tr|F6SL33|F6SL33_MACMU	NCF1	NA	NA	NA	NA	NA	NA	NA	NA	-0.164	0	-0.0466	0.92	-0.547	0.244	0.232	NA	NA	NA	NA
6143	P14618	F6XKL2	tr|F6XKL2|F6XKL2_MACMU	PKM	0.514	0.465	0.259	0.148	0.151	-0.248	-0.297	-0.435	-0.223	-0.0642	0.419	0.0963	0	-0.107	0.17	-0.191	-0.157	0.138	-0.136
16023	P14621	F6UFR3	tr|F6UFR3|F6UFR3_MACMU	ACYP2	0.586	0.33	0.106	0.238	0.106	-0.398	-0.628	-0.722	NA	NA	NA	NA	NA	NA	NA	-0.467	0.217	-0.155	-0.106
2805	P14625	F7EZT6	tr|F7EZT6|F7EZT6_MACMU	HSP90B1	0.149	0.266	0.128	0.0142	0.236	-0.111	-0.0664	-0.117	0	-0.0307	-0.0612	0.0786	0.0516	0.304	-0.0959	-0.012	-0.00674	0.2	-0.0593
3481	P14780	F6W5A7	tr|F6W5A7|F6W5A7_MACMU	MMP9	-0.222	-0.788	0.442	-0.11	0.105	0.252	0.397	0.837	-0.0992	0.0752	0	-0.251	-0.133	-0.192	0.264	NA	NA	NA	NA
15902	P14854	Q53CG4	sp|Q53CG4|CX6B1_MACMU	COX6B1	1.7	0.323	0.571	0.628	0.5	-0.824	-0.722	-1.07	-0.903	-0.62	0.857	1.31	0	0.439	-0.481	0.0659	-1.05	-0.215	-0.514
4588	P14866	F7AN89	tr|F7AN89|F7AN89_MACMU	HNRNPL	-0.268	0.409	0.854	0.214	-0.0363	0.449	0.565	0.334	-0.416	0.125	0.285	-0.613	-0.0314	0.444	-0.397	-0.129	0	-0.173	-0.395
6927	P14868	F7H1D0	tr|F7H1D0|F7H1D0_MACMU	DARS	-0.561	-0.238	0.0118	-0.0118	0.176	0.082	0.581	-0.0188	NA	NA	NA	NA	NA	NA	NA	0.132	-0.107	0.086	-1.09
9152	P14902	F6SGT6	tr|F6SGT6|F6SGT6_MACMU	IDO1	NA	NA	NA	NA	NA	NA	NA	NA	0	0.491	-0.666	0.139	-0.728	-0.44	0.321	NA	NA	NA	NA
3264	P14923	F7H7V0	tr|F7H7V0|F7H7V0_MACMU	JUP	NA	NA	NA	NA	NA	NA	NA	NA	0.465	-0.25	0.362	-0.304	-0.852	0	0.386	0.524	1.33	-0.367	-0.562
15226	P15090	F7GLY0	tr|F7GLY0|F7GLY0_MACMU	FABP4	0.262	0.648	0.156	0.299	0.0422	-0.492	-0.305	-0.666	-0.395	0.182	-0.0156	0.206	0	-0.411	-0.464	0.864	-0.755	0.133	-1.01
8408	P15104	F7CAM5	tr|F7CAM5|F7CAM5_MACMU	GLUL	0.146	0.799	1.65	0.522	0.589	-0.114	-0.183	-0.215	-0.56	0.195	0.0228	0.371	-0.112	-0.164	0.759	-0.115	-0.543	0	-0.172
11721	P15121	F7AZF0	tr|F7AZF0|F7AZF0_MACMU	AKR1B1	0.389	0.173	0.135	-0.4	-0.0608	-0.911	-0.642	-0.502	NA	NA	NA	NA	NA	NA	NA	0.0608	-0.309	0.392	0.452
1947	P15144	F6VKN1	tr|F6VKN1|F6VKN1_MACMU	ANPEP	-0.442	0.0298	-0.135	-0.166	-0.372	-0.000536	0.319	0.0806	0.184	0.218	0	-0.215	-0.316	-0.241	0.39	0.0535	0	-0.194	0.435
13763	P15153	F6XSJ9	tr|F6XSJ9|F6XSJ9_MACMU	RAC2	0.33	0.0188	-0.0168	0.195	0.00903	0.315	0.0742	0.0901	-0.247	-0.00908	-0.168	-0.426	0.201	-0.205	0.171	0	-0.151	-0.47	-0.437
7860	P15169	F6XVC9	tr|F6XVC9|F6XVC9_MACMU	CPN1	-0.359	-0.207	-0.192	0.301	0.0159	0	0.855	0.697	0.344	0.435	-0.292	0.235	-0.0609	-0.147	0.398	-0.185	-0.182	-0.514	0.284
6074	P15289	F7GAI3	tr|F7GAI3|F7GAI3_MACMU	ARSA	-0.198	-0.0611	0	-0.108	-0.0218	0.179	-0.174	-0.169	0.354	-0.177	0.131	-0.292	0.012	0.111	0.0187	0.29	0.623	0.231	-0.0238
8589	P15291	F6WPI5	tr|F6WPI5|F6WPI5_MACMU	B4GALT1	0.322	0.209	-0.0319	-0.182	-0.0514	-0.104	-0.000135	0.0314	0.0484	-0.121	-0.215	0.343	0.251	0.265	0	-0.0406	-0.0461	0.488	0.234
5012	P15311	F6QSQ3	tr|F6QSQ3|F6QSQ3_MACMU	EZR	-0.00895	-0.0294	0.239	0.0501	0.114	0.313	0.0686	0.588	0.012	0.0823	-0.029	-0.351	-0.157	-0.174	-0.0407	0	0.179	-0.157	-0.103
11654	P15328	F7BP60	tr|F7BP60|F7BP60_MACMU	FOLR1	NA	NA	NA	NA	NA	NA	NA	NA	0	-0.209	0.588	-0.404	0.188	-0.198	-0.0241	0.319	0.218	0.281	-0.243
11870	P15559	F6RW03	tr|F6RW03|F6RW03_MACMU	NQO1	NA	NA	NA	NA	NA	NA	NA	NA	-0.0111	0.489	-0.536	0.862	0.086	-0.251	0.161	0	-0.259	-0.128	0.175
5102	P15586	F7HBI0	tr|F7HBI0|F7HBI0_MACMU	GNS	0	-0.163	0.0388	-0.0627	-0.269	0.378	-0.0756	-0.133	0.377	-0.064	0.257	-0.407	0.464	0.213	-0.0587	0.918	0.64	-0.0153	0.144
15158	P15814	F7EDL2	tr|F7EDL2|F7EDL2_MACMU	IGLL1	-0.794	-0.328	0.11	-0.149	-0.365	0.0627	0.381	0.723	0.514	0.371	-0.371	0.0895	-0.988	-0.746	0	0.383	-0.287	-0.667	0.582
8047	P15907	F6TW24	tr|F6TW24|F6TW24_MACMU	ST6GAL1	-0.438	-0.0313	-0.279	0.325	-0.0481	0.268	0.22	0.458	0.127	0.165	-0.23	-0.15	0.296	0.0996	0	-0.0911	-0.272	-0.0524	0.272
95	P15924	F6WDG6	tr|F6WDG6|F6WDG6_MACMU	DSP	-0.658	-0.446	-0.506	-0.293	-0.268	2.87	0	0.254	-0.116	-0.218	0.23	-0.181	0.409	-0.152	0.356	0.373	0.752	0.29	0.121
4059	P16050	F7EPQ4	tr|F7EPQ4|F7EPQ4_MACMU	ALOX15	-0.492	-0.687	-0.48	0.905	0	0.0445	-0.149	0.665	-0.101	0.379	-0.361	-0.305	0.361	0.828	0.116	-0.758	1.13	-0.947	0.0715
13077	P16083	F7H0V0	tr|F7H0V0|F7H0V0_MACMU	NQO2	0.832	0.364	0.135	0.137	0.08	-0.335	-0.17	-0.255	-0.0329	0.135	0.633	-0.193	0	-0.175	0.143	-0.124	0.0937	-0.00383	-0.0356
12097	P16152	F7D1C5	tr|F7D1C5|F7D1C5_MACMU	CBR1	0.448	0.35	0.206	0.598	-0.102	-0.376	-0.549	-0.349	-0.49	0.0101	0.286	-0.458	0.0986	0.068	0	-0.248	0.179	-0.238	-0.266
8327	P16219	F7BL23	tr|F7BL23|F7BL23_MACMU	ACADS	NA	NA	NA	NA	NA	NA	NA	NA	0.588	0.417	-0.278	0.128	-0.575	-0.398	0.203	0.669	-0.467	-0.344	0
1404	P16234	F6SLY4	tr|F6SLY4|F6SLY4_MACMU	PDGFRA	NA	NA	NA	NA	NA	NA	NA	NA	0.44	-0.0246	-0.304	-0.00816	-0.0029	0.0267	-0.225	0.00741	0.148	0.224	0
13351	P16401	F7BRW5	tr|F7BRW5|F7BRW5_MACMU	HIST1H1B	-0.0506	0.0168	0.0665	-0.0586	-0.0168	0.128	-0.133	0.138	NA	NA	NA	NA	NA	NA	NA	NA	NA	NA	NA
4243	P16519	F7GNE5	tr|F7GNE5|F7GNE5_MACMU	PCSK2	-0.35	0.0715	-0.371	-0.00636	-0.334	0.00595	0.0653	0.0121	-0.0301	-0.0184	-0.136	-0.0617	0	0.197	-0.191	0.0708	0.171	0.346	0.187
15972	P16860	H9H5C0	tr|H9H5C0|H9H5C0_MACMU	NPPB	-0.0844	0.355	-0.128	-0.369	0	-0.261	0.159	0.102	-0.194	-0.313	-0.177	-0.285	0.225	-0.0203	0.495	0.216	0.24	0.901	0.103
6467	P16870	F7FE30	tr|F7FE30|F7FE30_MACMU	CPE	0.0713	0.157	-0.0123	-0.301	-0.0245	0.0331	-0.408	-0.238	0.325	-0.0723	-0.0332	-0.262	0.204	0.164	-0.188	0.329	0.311	0.376	0
908	P16885	F7GH26	tr|F7GH26|F7GH26_MACMU	PLCG2	NA	NA	NA	NA	NA	NA	NA	NA	0.00309	-0.409	-0.285	-0.27	0.174	0	0.0386	NA	NA	NA	NA
7853	P16930	F7HLF5	tr|F7HLF5|F7HLF5_MACMU	FAH	0.0166	0.199	-0.122	0.751	0.0674	-0.208	-0.0446	0.55	-0.213	0.592	0.407	-0.332	-0.276	-0.265	-0.404	0.713	0	0.108	-0.978
15015	P16949	F6WZM7	tr|F6WZM7|F6WZM7_MACMU	STMN1	0.839	1.19	0.598	0.71	0.611	-0.244	-0.489	-0.448	-0.603	-0.0133	0.647	0.51	0.355	0.472	0	-0.0428	-0.377	-0.161	-0.351
6670	P17030	F7DV80	tr|F7DV80|F7DV80_MACMU	ZNF25	NA	NA	NA	NA	NA	NA	NA	NA	0.0738	0	-0.105	-0.416	0.374	-0.00435	0.251	NA	NA	NA	NA
9174	P17050	F7GVW2	tr|F7GVW2|F7GVW2_MACMU	NAGA	0.665	-0.218	-0.0267	-0.342	0.164	0.779	-0.17	-0.0894	0.408	0	0.261	-0.182	0.193	-0.265	0.0166	-0.0264	0.508	-0.0686	0.0781
9672	P17174	F6R167	tr|F6R167|F6R167_MACMU	GOT1	0.464	0.398	0	0.22	0.16	-0.652	-0.692	-0.87	-0.547	0.182	0.371	0.0378	-0.37	0.363	-0.527	-0.847	-0.931	-0.22	0.488
6094	P17181	F6Z9E8	tr|F6Z9E8|F6Z9E8_MACMU	IFNAR1	0.305	-0.601	-0.5	-0.162	-0.0243	0.281	-0.0501	-0.0165	-0.527	-0.288	0.22	0.0577	0.253	0.042	0.103	-0.0286	0	0.181	0.121
8646	P17302	F7C314	tr|F7C314|F7C314_MACMU	GJA1	NA	NA	NA	NA	NA	NA	NA	NA	0.156	0.0841	-0.408	-0.0187	0	0.0949	-0.25	NA	NA	NA	NA
4055	P17405	F7C9N4	tr|F7C9N4|F7C9N4_MACMU	SMPD1	-0.037	-0.0209	0.15	-0.114	-0.0562	-0.0247	0	-0.128	0.374	0.183	0.0142	-0.166	0.219	-0.0604	-0.0067	0.78	0.666	0.0686	0.227
7779	P17540	F7E1U1	tr|F7E1U1|F7E1U1_MACMU	CKMT2	0.433	0.577	0.114	0.838	-4.24e-05	-0.428	4.24e-05	-0.202	NA	NA	NA	NA	NA	NA	NA	0.822	-0.568	-0.288	-0.369
3474	P17600	F6VRW8	tr|F6VRW8|F6VRW8_MACMU	SYN1	0.0312	0.963	0.351	0.828	0.494	-0.489	-0.901	-1.11	-0.881	-0.577	0.707	1.03	-0.128	0.424	-0.769	-0.267	0	0.194	-0.245
3508	P17655	F6TJJ5	tr|F6TJJ5|F6TJJ5_MACMU	CAPN2	0.314	0.854	0.268	0.604	-0.095	-0.267	-0.0219	0.288	-0.179	0.255	0.0647	0	0.134	-0.13	0.724	-0.00382	-0.199	-0.13	-0.0514
7293	P17661	F7ERR2	tr|F7ERR2|F7ERR2_MACMU	DES	-0.292	0.257	-0.155	1.38	-0.264	0.107	-0.0926	0.0836	-0.371	0.772	0.249	-0.908	0.0869	0.123	0	-0.314	-0.377	-0.319	0.0563
13147	P17677	F7FEE3	tr|F7FEE3|F7FEE3_MACMU	GAP43	0.451	0.511	0.53	0.1	0.87	-0.571	-0.628	-1.02	-0.913	-0.531	0.867	0.888	0.128	0	-0.00408	-0.173	-0.0527	0.128	-0.0177
4357	P17844	F7A985	tr|F7A985|F7A985_MACMU	DDX5	NA	NA	NA	NA	NA	NA	NA	NA	NA	NA	NA	NA	NA	NA	NA	-0.165	0.138	-0.138	0.15
14006	P17900	F6WMW1	tr|F6WMW1|F6WMW1_MACMU	GM2A	0.324	0	-0.134	-0.14	-0.102	-0.347	-0.0427	-0.478	0.0722	-0.196	-0.222	0.0575	0.128	0.435	-0.334	0.0125	0.128	0.282	0.16
1385	P17927	F7GSU0	tr|F7GSU0|F7GSU0_MACMU	CR1	NA	NA	NA	NA	NA	NA	NA	NA	0.274	-0.267	-0.0986	0.0759	0.168	0	0.338	-0.0773	-0.168	0.0922	-0.15
11025	P17936	F6RF33	tr|F6RF33|F6RF33_MACMU	IGFBP3	-0.00615	0.549	0.152	-0.352	0.299	-0.384	0	-0.0144	-0.127	-0.56	0.0773	0.294	-0.0153	-0.141	-0.0658	0.333	0.889	0.033	0.56
7708	P17980	F6T5K3	tr|F6T5K3|F6T5K3_MACMU	PSMC3	NA	NA	NA	NA	NA	NA	NA	NA	NA	NA	NA	NA	NA	NA	NA	0.07	-0.00345	0.00345	-0.34
5656	P17987	F6T521	tr|F6T521|F6T521_MACMU	TCP1	-0.156	0.431	0.124	0.409	-0.169	0.66	0.0199	-0.0304	-0.669	0	0.0293	-0.289	0.502	0.248	0.739	-0.0714	-0.433	-0.124	-0.0206
9836	P18065	F6YKM5	tr|F6YKM5|F6YKM5_MACMU	IGFBP2	-0.0615	-0.512	-0.163	-0.31	-0.26	0.645	-0.129	0.205	0.108	-0.0258	-0.0591	-0.452	0.592	0.383	0.205	0.311	0.517	0	0.243
7646	P18428	F6T094	tr|F6T094|F6T094_MACMU	LBP	0	0.00838	-0.105	0.146	-0.00339	-0.219	0.0314	0.0884	0.00971	0.221	-0.459	0.0636	-0.465	-0.259	0.0614	-0.175	-0.767	0.0487	-0.232
15186	P18509	F7GJV0	tr|F7GJV0|F7GJV0_MACMU	ADCYAP1	-0.105	-0.473	-0.0839	-0.526	-0.202	-0.353	0.0581	-0.37	0.424	0.195	-0.0322	0.248	0.506	0	-0.152	0.223	0.039	0.481	0.346
2608	P18564	F7HQ11	tr|F7HQ11|F7HQ11_MACMU	ITGB6	-0.422	0.264	0.567	-0.274	0.328	0.306	0.672	0.862	0	-0.106	-0.308	-0.11	-0.207	-0.202	0.138	NA	NA	NA	NA
986	P18583	F7GTY5	tr|F7GTY5|F7GTY5_MACMU	SON	-0.741	-0.386	0.776	0.699	-0.0825	-0.0464	1.1	-0.503	0.438	0	0.198	0.467	-0.593	0.272	0.665	-1.47	0.222	-0.318	-0.222
12115	P18669	F7GGM3	tr|F7GGM3|F7GGM3_MACMU	PGAM1	0.403	0.622	0.28	0.309	0.23	-0.262	-0.231	-0.209	-0.562	-0.0874	0.675	0.111	0	0.154	-0.0615	-0.111	-0.545	-0.0386	0.409
11368	P18827	F6ZI80	tr|F6ZI80|F6ZI80_MACMU	SDC1	NA	NA	NA	NA	NA	NA	NA	NA	-0.068	-0.0521	0.111	0	0.0931	-0.231	0.191	NA	NA	NA	NA
4909	P18850	F6ZR51	tr|F6ZR51|F6ZR51_MACMU	ATF6	-0.57	-0.427	-0.103	-0.201	-0.11	0.423	-0.0691	0	0.0879	0.237	-0.786	0.15	-0.0325	0.238	0.271	0.209	0.227	0.651	-0.0134
7732	P19012	F7A670	tr|F7A670|F7A670_MACMU	KRT15	NA	NA	NA	NA	NA	NA	NA	NA	-0.497	0.178	0	-0.0126	0.0223	-0.467	0.17	0.444	-0.231	-0.495	0.157
2100	P19021	F7BDY1	tr|F7BDY1|F7BDY1_MACMU	PAM	0.15	0.0667	-0.285	-0.0233	-0.09	-0.0376	0	-0.056	0.0717	-0.0516	-0.175	0.0792	0.0594	0.328	-0.193	-0.0511	0.271	0.563	0.186
2189	P19022	F6WI86	tr|F6WI86|F6WI86_MACMU	CDH2	0.31	0.00678	-0.246	0.0704	-0.0207	-0.0528	0	-0.175	-0.1	-0.0369	-0.0468	0.217	0.189	0.512	-0.137	-0.000238	0.246	0.402	0.177
9442	P19086	F7GJC8	tr|F7GJC8|F7GJC8_MACMU	GNAZ	NA	NA	NA	NA	NA	NA	NA	NA	NA	NA	NA	NA	NA	NA	NA	-1.11	-0.141	0.38	0.141
3642	P19320	F6W7X9	tr|F6W7X9|F6W7X9_MACMU	VCAM1	-0.156	-0.347	0.00507	0	-0.161	0.187	-0.00173	0.282	0.0639	-0.27	0.0794	-0.42	-0.084	-0.183	0.11	0.3	-0.332	0.322	0.0746
3599	P19338	H9H3Z4	tr|H9H3Z4|H9H3Z4_MACMU	NCL	-0.15	0.263	0.0301	-0.246	0.236	0.101	0.137	0	-0.445	0.0583	-0.319	0.0264	0.119	-0.308	0.08	-0.375	-0.613	-0.438	-0.609
12273	P19404	F7HLZ3	tr|F7HLZ3|F7HLZ3_MACMU	NDUFV2	1.71	0.728	0.0531	0.937	0.601	-0.447	-0.929	-1.12	-0.545	-0.296	0.62	0.905	0.353	0	-0.197	0.229	-0.199	-0.352	-0.546
7163	P19438	F6YFE9	tr|F6YFE9|F6YFE9_MACMU	TNFRSF1A	0	0.421	0.0787	0.644	0.12	-0.724	-0.203	-0.707	-0.398	-0.3	0.074	-0.0708	0.225	0.188	-0.525	-0.0895	-0.0344	0.213	0.994
10707	P19623	F6S2N2	tr|F6S2N2|F6S2N2_MACMU	SRM	NA	NA	NA	NA	NA	NA	NA	NA	NA	NA	NA	NA	NA	NA	NA	-0.0604	0.0604	-0.321	0.651
2032	P19823	F7DD08	tr|F7DD08|F7DD08_MACMU	ITIH2	-0.555	-0.236	0.16	0	0.0745	-0.094	0.848	0.439	0.0824	0.929	-0.428	0.233	-0.0867	-0.228	0.551	-0.258	-0.21	-0.656	0.313
3509	P19827	F7GAT9	tr|F7GAT9|F7GAT9_MACMU	ITIH1	-0.612	-0.367	0.159	-0.0612	0.0659	-0.00338	0.893	0.316	0	0.793	-0.298	0.05	-0.141	-0.171	0.396	-0.225	0.0388	-0.46	0.163
15532	P19957	A4K2T4	tr|A4K2T4|A4K2T4_MACMU	PI3	0.263	1.17	-0.0701	-0.16	0.156	0.126	-0.127	-0.151	-0.411	-0.583	0.77	0.25	0.156	-0.328	0	NA	NA	NA	NA
7155	P19971	F7GLL7	tr|F7GLL7|F7GLL7_MACMU	TYMP	-0.298	-0.0237	0.00877	0.0471	0.0826	0.194	0.225	0.577	-0.0634	0.111	0.138	-0.181	0	0.115	-0.359	-0.156	-0.341	-0.353	-0.257
2508	P20023	F7GSR2	tr|F7GSR2|F7GSR2_MACMU	CR2	NA	NA	NA	NA	NA	NA	NA	NA	-0.193	0.051	-0.104	0	-0.213	-0.416	0.133	0.956	0.649	1.09	-0.151
10134	P20042	F7EFU6	tr|F7EFU6|F7EFU6_MACMU	EIF2S2	0.274	0.051	0.472	0.325	0.533	0.134	-0.469	-0.179	-0.173	-0.125	0.116	0.139	0.115	-0.352	0	-0.362	-1.14	-0.426	-0.418
8344	P20062	F6Q5F0	tr|F6Q5F0|F6Q5F0_MACMU	TCN2	-0.12	-0.0691	0.375	0.0691	0.0934	0.258	-0.233	-0.475	NA	NA	NA	NA	NA	NA	NA	NA	NA	NA	NA
13005	P20160	F6QFF9	tr|F6QFF9|F6QFF9_MACMU	AZU1	-0.619	-0.562	0.216	-0.594	-0.34	0.146	-0.128	3.93	0.173	0.232	0	-0.0286	0.19	-0.0168	0.364	NA	NA	NA	NA
7114	P20333	F7EAE4	tr|F7EAE4|F7EAE4_MACMU	TNFRSF1B	0.117	0.426	-0.248	-0.244	-0.162	0.469	-0.125	0	-1.05	-0.265	0.353	0.1	0.286	-0.248	0.0268	NA	NA	NA	NA
13052	P20336	F7ASU4	tr|F7ASU4|F7ASU4_MACMU	RAB3A	NA	NA	NA	NA	NA	NA	NA	NA	NA	NA	NA	NA	NA	NA	NA	0.306	-0.25	0.25	-0.309
15258	P20366	F6UEP6	tr|F6UEP6|F6UEP6_MACMU	TAC1	0.642	-0.116	-0.0817	-0.3	-0.221	-0.251	-0.0509	-0.694	0.157	-0.211	-0.27	0.228	0.666	0	0.0289	0.289	0.0251	0.181	0.199
12881	P20396	F7D5R6	tr|F7D5R6|F7D5R6_MACMU	TRH	0.0333	-0.219	-0.211	-0.382	-0.162	0.176	0.366	0.136	0.662	-0.221	-1.02	0.602	0.0945	-0.341	-0.0676	0	-0.0907	0.0648	0.393
15942	P20472	F7DKF9	tr|F7DKF9|F7DKF9_MACMU	PVALB	NA	NA	NA	NA	NA	NA	NA	NA	-0.135	-0.296	0.755	0	-0.126	1.04	0.685	NA	NA	NA	NA
4552	P20591	A1E2I4	sp|A1E2I4|MX1_MACMU	MX1	NA	NA	NA	NA	NA	NA	NA	NA	NA	NA	NA	NA	NA	NA	NA	0.298	-0.096	-0.046	0.046
12733	P20618	F7GNS6	tr|F7GNS6|F7GNS6_MACMU	PSMB1	-0.336	-0.0957	0.567	0.192	0.312	0.303	-0.198	0.731	-0.163	0.171	0.0403	-0.134	0.0516	-0.3	0.25	-0.119	-0.0237	-0.058	0
11603	P20645	F7DKQ6	tr|F7DKQ6|F7DKQ6_MACMU	M6PR	NA	NA	NA	NA	NA	NA	NA	NA	-0.268	0.555	-0.65	0.0587	0	-0.129	0.0296	NA	NA	NA	NA
5220	P20700	F6Q273	tr|F6Q273|F6Q273_MACMU	LMNB1	-0.813	-0.335	0.476	-0.387	0.445	0.479	-0.271	0.871	0.208	0.568	0	-0.407	0.0257	-0.163	0.368	-0.521	0.146	-0.227	-0.106
11142	P20774	F6TE11	tr|F6TE11|F6TE11_MACMU	OGN	-0.0676	-0.353	-0.461	-0.0177	-0.126	0.104	0.152	-0.135	0.249	-0.167	0.123	-0.743	0.0963	0.353	-0.0486	0.182	0.564	0	0.284
3821	P20810	F7C6H4	tr|F7C6H4|F7C6H4_MACMU	CAST	0.48	0.641	0.146	0.442	0.317	-0.193	-0.445	-0.432	-0.537	-0.0768	0.789	0.281	0.202	0.354	0	-0.651	-0.0379	-0.552	-0.195
12385	P20851	F6XIH5	tr|F6XIH5|F6XIH5_MACMU	C4BPB	-0.577	-0.314	0.0872	0.168	0	-0.168	1.21	0.696	0.353	1.01	-0.476	0.15	-0.321	-0.0611	0.768	-0.53	-0.359	-0.594	0.616
4323	P20916	F6WAA5	tr|F6WAA5|F6WAA5_MACMU	MAG	0.234	0.171	0.43	-0.0724	0.524	-0.0892	-0.37	-0.701	-0.175	-0.259	0.194	0.205	0.084	0	-0.156	-0.0286	-0.0816	0.497	0.158
11127	P20933	F6T3R7	tr|F6T3R7|F6T3R7_MACMU	AGA	-0.153	0.404	-0.326	-0.235	0	0.241	-0.144	-0.351	0.154	-0.428	0.201	-0.172	0.0146	0.0295	-0.221	0.0814	0.48	0.402	-0.0312
14604	P21246	F7H722	tr|F7H722|F7H722_MACMU	PTN	-0.0291	-0.804	0	-0.203	-0.324	0.204	-0.0803	0.105	0.129	-0.206	0.337	-1.05	-0.179	0.155	-0.0496	0.289	0.539	0.223	0.348
12857	P21266	F7H5D7	tr|F7H5D7|F7H5D7_MACMU	GSTM3	0.619	1.99	-0.0702	1.23	-0.355	-0.378	-0.412	-0.311	-0.149	0.164	0.271	0.0593	0	-0.215	0.545	0.177	-0.26	-0.246	0.0592
6110	P21281	F7GLJ4	tr|F7GLJ4|F7GLJ4_MACMU	ATP6V1B2	0.197	0.24	0.398	0.525	-0.305	0.0251	0.0323	-0.093	-0.493	0.306	-0.000169	-0.319	0.0589	-0.325	0.29	0	-0.191	-0.0995	-0.265
13368	P21291	F7HCD8	tr|F7HCD8|F7HCD8_MACMU	CSRP1	0.85	0.233	0.17	1.03	-0.293	0.0765	-0.336	-0.283	-0.336	-0.0773	0	-0.243	0.263	0.0858	0.408	0.359	-0.276	-0.427	-0.222
10843	P21453	F7EUN9	tr|F7EUN9|F7EUN9_MACMU	S1PR1	NA	NA	NA	NA	NA	NA	NA	NA	0.0134	-0.0682	-0.317	-0.0151	0	0.00549	-0.12	0.0532	0.108	-0.314	0.454
6824	P21554	Q71SP5	sp|Q71SP5|CNR1_MACMU	CNR1	NA	NA	NA	NA	NA	NA	NA	NA	NA	NA	NA	NA	NA	NA	NA	-0.238	0.14	0.0467	-0.0467
11936	P21583	F6SDB0	tr|F6SDB0|F6SDB0_MACMU	KITLG	-0.00449	0.197	-0.2	0.461	-0.372	0.00449	0.206	-0.0628	NA	NA	NA	NA	NA	NA	NA	-0.105	0.168	0.626	-0.166
10266	P21695	F7HTX7	tr|F7HTX7|F7HTX7_MACMU	GPD1	NA	NA	NA	NA	NA	NA	NA	NA	0	-0.0392	0.128	-0.17	0.221	-0.648	0.117	0.673	-0.253	0.39	-0.483
14758	P21741	F7EAF4	tr|F7EAF4|F7EAF4_MACMU	MDK	0.155	-0.775	0.273	-0.358	0.241	0.204	-0.171	0	-0.0345	1.96	0.171	-0.286	-0.239	-0.0126	-0.121	0.234	0.555	0.594	-0.0161
4803	P21802	F7A5X3	tr|F7A5X3|F7A5X3_MACMU	FGFR2	0.121	-0.236	0.125	-0.378	0.472	-0.037	0.0393	-0.0734	-0.075	-0.0143	-0.0919	-0.00276	0	0.25	-0.125	0.15	0.502	0.416	0.132
9019	P21810	F7ESZ3	tr|F7ESZ3|F7ESZ3_MACMU	BGN	0.115	-0.217	-0.0186	0.146	-0.236	0.0212	-0.184	-0.249	-0.0683	0.146	0.122	-0.19	0.248	-0.506	-0.123	0.338	0.345	0	0.135
736	P21860	F7HEH3	tr|F7HEH3|F7HEH3_MACMU	ERBB3	-0.244	-0.591	0.241	-0.558	0.0653	0.491	-0.0653	0.179	NA	NA	NA	NA	NA	NA	NA	NA	NA	NA	NA
6803	P21941	F7HUJ5	tr|F7HUJ5|F7HUJ5_MACMU	MATN1	NA	NA	NA	NA	NA	NA	NA	NA	NA	NA	NA	NA	NA	NA	NA	0.0197	-0.122	0.282	-0.0197
12339	P21964	F6QFW9	tr|F6QFW9|F6QFW9_MACMU	COMT	-0.691	-0.567	-0.399	0.611	-0.407	0	0.58	1.16	0.224	-0.0151	0.148	0.0524	-0.24	-0.409	0.0163	-0.0311	-0.438	0.217	0.179
4385	P21980	F6ZTT6	tr|F6ZTT6|F6ZTT6_MACMU	TGM2	-0.102	-0.229	-0.242	-0.171	-0.241	0.375	0.145	0.102	NA	NA	NA	NA	NA	NA	NA	0.261	0.214	0.134	-0.156
5974	P22004	F7E4H6	tr|F7E4H6|F7E4H6_MACMU	BMP6	0.109	-0.0895	-0.328	0.0719	-0.109	0.124	0.121	0.0676	0.174	0	-0.571	0.108	0.239	-0.382	-0.0543	-0.318	0.139	-0.563	-0.0272
4435	P22303	F7HPD6	tr|F7HPD6|F7HPD6_MACMU	ACHE	-0.207	-0.348	-0.216	-0.242	-0.258	0.923	0.0987	0.0877	-0.19	0.454	-0.271	0	0.115	0.0781	-0.459	0.0383	0.0892	0.207	-0.267
5434	P22304	F6Z687	tr|F6Z687|F6Z687_MACMU	IDS	-0.162	-0.184	-0.148	-0.21	0.00162	0.284	-0.0352	0.0841	0.0685	-0.0212	0.202	-0.263	0	0.4	-1.45e-05	0.301	0.251	-0.0209	0.241
1484	P22314	F7HPQ2	tr|F7HPQ2|F7HPQ2_MACMU	UBA1	0.156	0.58	0.00828	0.809	-0.269	0.0285	-0.193	-0.289	-0.312	0.123	0.0985	-0.289	0.0106	-0.138	0.0913	0	-0.182	-0.155	-0.207
14678	P22392	F7H6X2	tr|F7H6X2|F7H6X2_MACMU	NME1-NME2	0.818	0.792	0.452	0.925	0	-0.285	-0.37	-0.491	-0.616	0.0324	1.41	-0.39	0.448	0.474	0.323	-0.532	-0.299	-0.374	-0.526
15914	P22466	F7E2R8	tr|F7E2R8|F7E2R8_MACMU	GAL	0.19	-0.382	-0.624	-0.506	0.0872	-0.275	0.538	0.175	-0.627	-0.0425	-0.244	-0.4	0.527	0.0722	0.178	0.213	0.189	0	-0.0367
14394	P22492	P40286	sp|P40286|H1T_MACMU	HIST1H1T	NA	NA	NA	NA	NA	NA	NA	NA	0.306	0.57	0.326	-0.217	0	-0.168	-0.194	NA	NA	NA	NA
8954	P22626	F6QE39	tr|F6QE39|F6QE39_MACMU	HNRNPA2B1	NA	NA	NA	NA	NA	NA	NA	NA	-0.369	0.566	0.188	-0.352	0.339	0.542	0.026	-0.323	-0.0949	0	-1.03
2017	P22681	F6SMS3	tr|F6SMS3|F6SMS3_MACMU	CBL	-0.25	-0.272	0.12	-0.575	0.176	0.458	0.208	0.0291	0.0322	-0.155	0.476	-0.331	-0.212	-0.08	0	-0.42	-1.2	1.4	0.474
11632	P22692	F7HF07	tr|F7HF07|F7HF07_MACMU	IGFBP4	0.0835	0.00649	-0.219	-0.312	-0.0143	-0.0809	-0.0429	0.103	0.0981	-0.124	-0.0257	-0.0332	0.0145	0.162	-0.0148	0.283	0.285	0.37	0
11898	P22748	F6PNY6	tr|F6PNY6|F6PNY6_MACMU	CA4	-0.338	-0.301	-0.253	0.302	-0.117	0	-0.00989	-0.00342	0.0337	0.323	-0.0789	-0.234	0.079	0.0344	-0.0224	0.202	0.541	0.679	0.137
5950	P22792	F7B749	tr|F7B749|F7B749_MACMU	CPN2	-0.27	-0.163	0	0.0677	-0.0295	-0.0572	0.632	0.69	0.428	0.448	-0.311	0.263	-0.208	-0.0713	0.361	-0.212	0.0567	-0.212	0.207
8541	P22891	F6SB17	tr|F6SB17|F6SB17_MACMU	PROZ	0	-0.0121	0.162	-0.402	0.272	-0.0201	0.879	0.00871	0.135	-0.0846	-0.338	0.953	0.0576	0.164	0.349	-0.0451	-0.0235	-0.284	-0.123
7282	P22894	F7GG37	tr|F7GG37|F7GG37_MACMU	MMP8	-0.416	-0.418	0.166	-0.27	0.419	-0.134	0.289	1.38	0	1.12	-0.0835	0.0728	-0.658	-0.465	0.623	NA	NA	NA	NA
554	P22897	F6PK24	tr|F6PK24|F6PK24_MACMU	MRC1	-0.000676	-0.0572	0.00283	0.232	-0.116	0.0999	0.124	0.167	-0.148	0.0938	0.223	-0.0502	-0.0775	-0.131	-0.0704	0.0294	0	0.515	-0.0615
3595	P23142	F6PLV7	tr|F6PLV7|F6PLV7_MACMU	FBLN1	0.128	-0.0693	0	-0.131	-0.253	0.116	-0.124	-0.0979	0.0714	-0.183	0.117	-0.127	0.2	0.257	-0.122	0.596	0.415	0.434	-0.105
4706	P23246	F6SSM0	tr|F6SSM0|F6SSM0_MACMU	SFPQ	NA	NA	NA	NA	NA	NA	NA	NA	NA	NA	NA	NA	NA	NA	NA	0.0859	-0.0859	0.58	-0.995
13198	P23284	F7HFK5	tr|F7HFK5|F7HFK5_MACMU	PPIB	0.371	-0.0659	-0.0357	-0.0486	0.187	0.058	0	-0.227	-0.135	-0.129	0.0525	-0.0481	0.427	0.327	-0.132	0.616	0.488	-0.241	0.163
15849	P23297	F7HGE0	tr|F7HGE0|F7HGE0_MACMU	S100A1	1.09	0.27	0.302	0.992	0	-0.272	-0.236	-0.386	-0.206	0.271	0.588	0.127	0.241	-0.211	0.479	-0.181	-0.404	-0.244	-0.408
5761	P23368	F6RIZ9	tr|F6RIZ9|F6RIZ9_MACMU	ME2	NA	NA	NA	NA	NA	NA	NA	NA	NA	NA	NA	NA	NA	NA	NA	0.787	-0.193	0.134	-0.134
6995	P23381	F6QVM3	tr|F6QVM3|F6QVM3_MACMU	WARS	0.242	0.36	0.362	0.383	0.172	-0.0978	0	-0.0576	-0.0595	0.029	0.299	-0.218	0.0947	-0.033	0.0326	-0.366	-0.378	-0.302	-0.262
12613	P23396	F7A782	tr|F7A782|F7A782_MACMU	RPS3	1.38	0.424	0.241	0.486	0.372	-0.22	-0.433	-0.597	-0.239	-0.195	0.376	0.0855	0.00486	0.111	-0.13	-0.263	-0.125	-0.197	0
13905	P23435	F6Z8Z1	tr|F6Z8Z1|F6Z8Z1_MACMU	CBLN1	0.0562	-0.421	-0.391	-0.247	0.218	0	0.00483	-0.087	0.266	-0.228	-0.13	-0.252	-0.0667	0.234	-0.103	0.198	0.463	0.244	0.1
307	P23468	F7DWE1	tr|F7DWE1|F7DWE1_MACMU	PTPRD	0.131	0.133	-0.106	-0.06	0.0219	-0.0089	-0.0595	-0.279	-0.0162	-0.2	0	0.0615	0.0199	0.184	-0.124	-0.0205	0.132	0.365	0.0826
193	P23471	F7DJJ9	tr|F7DJJ9|F7DJJ9_MACMU	PTPRZ1	-0.05	0.135	-0.0683	0.105	0.142	0.00406	-0.2	-0.205	0	-0.198	-0.000804	0.308	-0.185	0.157	-0.267	0.241	-0.028	0.616	0.122
7618	P23515	F7GZA4	tr|F7GZA4|F7GZA4_MACMU	OMG	0	0.00821	-0.112	-0.461	0.0158	-0.417	-0.276	-0.492	0.317	-0.13	-0.107	0.11	-0.145	0.276	-0.168	0.114	0.398	0.268	0.238
7876	P23526	F7DC90	tr|F7DC90|F7DC90_MACMU	AHCY	NA	NA	NA	NA	NA	NA	NA	NA	-0.0533	0.0661	0.325	0.179	0.0442	0	0.141	-0.00844	-0.0209	-0.00759	-0.114
14834	P23528	F6RBB3	tr|F6RBB3|F6RBB3_MACMU	CFL1	0.417	0.369	0.154	0.639	-0.0238	0.0593	-0.249	0.126	-0.639	0.158	0	-0.551	-0.0666	0.0757	0.0197	-0.485	-0.433	-0.76	-0.148
15308	P23582	F7DQS3	tr|F7DQS3|F7DQS3_MACMU	NPPC	0.0963	-0.613	-0.544	-0.0821	-0.204	0.111	-0.188	-0.123	-0.0577	-0.337	0	-0.154	0.128	0.318	0.0475	0.552	0.52	0.942	0.264
4560	P23588	F6QN28	tr|F6QN28|F6QN28_MACMU	EIF4B	0.381	0.23	0.223	0.00531	0.117	-0.489	-0.56	0.367	-0.2	-0.063	0	0.153	-0.0707	-0.0184	-0.271	NA	NA	NA	NA
15564	P23763	F7BYS8	tr|F7BYS8|F7BYS8_MACMU	VAMP1	-0.176	0.155	0	-0.00452	-0.00428	0.378	-0.0674	0.0733	-0.0178	-0.224	0.558	-0.221	0.153	-0.28	0.673	0.0673	0.113	0.366	-0.0373
4020	P23786	F6SJN6	tr|F6SJN6|F6SJN6_MACMU	CPT2	NA	NA	NA	NA	NA	NA	NA	NA	NA	NA	NA	NA	NA	NA	NA	0.356	0.287	-0.287	-0.423
2753	P23921	F6Z9D7	tr|F6Z9D7|F6Z9D7_MACMU	RRM1	NA	NA	NA	NA	NA	NA	NA	NA	0.174	1.07	0	0.53	-0.309	-0.0377	-0.15	0.358	-0.141	-0.0199	0.153
67	P24043	F7H3A8	tr|F7H3A8|F7H3A8_MACMU	LAMA2	-0.0138	-0.0471	0.0527	-0.0628	0.0288	0.2	-0.0142	-0.00831	0.0855	0.128	-0.0457	0	-0.187	-0.0247	-0.0025	0.225	0.216	0.259	0.261
6613	P24298	F6TEF9	tr|F6TEF9|F6TEF9_MACMU	GPT	0	0.0958	0.569	0.195	0.0678	0.183	-0.196	-0.031	-0.387	-0.481	-0.0993	0.311	0.958	-0.746	0.39	-0.337	-0.13	-0.105	0.245
6205	P24347	H9H3A5	tr|H9H3A5|H9H3A5_MACMU	MMP11	-0.00726	0.00726	-0.547	-0.155	0.101	0.0876	-0.426	-0.0904	NA	NA	NA	NA	NA	NA	NA	0.0648	0.113	0.324	-0.057
10236	P24387	F7DGB5	tr|F7DGB5|F7DGB5_MACMU	CRHBP	0.381	0.303	-0.0272	-0.43	0	-0.361	-0.169	-0.117	0.004	-0.118	0.339	-0.0668	0.107	-0.0963	0.0381	0.193	0.194	0.118	-0.266
7318	P24530	F7BXI7	tr|F7BXI7|F7BXI7_MACMU	EDNRB	NA	NA	NA	NA	NA	NA	NA	NA	NA	NA	NA	NA	NA	NA	NA	-0.264	0.264	0.505	-0.651
13006	P24534	F6QN95	tr|F6QN95|F6QN95_MACMU	EEF1B2	0.275	1.12	0.8	1.21	0.683	0.171	-0.233	-0.365	NA	NA	NA	NA	NA	NA	NA	-0.171	-0.394	-0.273	-0.276
11478	P24593	F6YKJ0	tr|F6YKJ0|F6YKJ0_MACMU	IGFBP5	-0.19	-0.298	-0.209	-0.797	0	-0.13	0.633	0.823	0.026	-0.189	0.0627	-0.305	0.0421	0.101	-0.165	-0.0319	0.0497	0.344	0.297
14593	P24666	F7HJ25	tr|F7HJ25|F7HJ25_MACMU	ACP1	-0.266	0.545	-0.154	0.617	0.0406	0.326	-0.0406	-0.0732	-0.363	0.0718	0.433	-0.199	0.273	0.531	0	-0.509	0.187	-0.385	-0.0371
8184	P24752	F6XC62	tr|F6XC62|F6XC62_MACMU	ACAT1	0.372	0.438	-0.487	-0.309	0.159	0.349	-0.0918	-0.29	NA	NA	NA	NA	NA	NA	NA	0.6	-0.468	0.0918	-0.952
1032	P24821	F7HU55	tr|F7HU55|F7HU55_MACMU	TNC	0.414	-0.153	0.928	-0.249	0.451	-0.0921	-0.0165	-0.136	-0.025	0.169	-0.137	0.573	0.0228	0	0.158	0.383	0.0816	-0.115	-0.0947
11942	P24855	F7EHR8	tr|F7EHR8|F7EHR8_MACMU	DNASE1	0.0146	0.241	-0.0811	-0.155	-0.769	0.107	-0.688	0.787	0.444	-0.189	-0.374	-0.13	0.28	-0.667	0.219	0.446	-0.199	0	0.0748
10982	P24941	F6ZHC1	tr|F6ZHC1|F6ZHC1_MACMU	CDK2	NA	NA	NA	NA	NA	NA	NA	NA	NA	NA	NA	NA	NA	NA	NA	0.165	-0.509	-0.165	0.309
12388	P25189	F7DA08	tr|F7DA08|F7DA08_MACMU	MPZ	-0.668	-0.696	-0.549	-0.161	-0.515	0.00529	0.586	0.369	NA	NA	NA	NA	NA	NA	NA	0.179	-0.00529	0.108	0.564
11396	P25311	F6YWS9	tr|F6YWS9|F6YWS9_MACMU	AZGP1	-0.372	-0.175	-0.0586	-0.264	0.0205	-0.0359	0.211	0.354	0.561	0.044	-0.101	0.0543	-0.594	-0.175	0.267	-0.0626	0	0.129	0.0782
15149	P25398	F7HDP3	tr|F7HDP3|F7HDP3_MACMU	RPS12	NA	NA	NA	NA	NA	NA	NA	NA	0.247	0.581	-0.291	-0.196	0	-0.196	0.278	0.391	-0.139	-0.493	0.273
5804	P25705	F7ETD0	tr|F7ETD0|F7ETD0_MACMU	ATP5A1	0.0243	-0.203	0.145	-0.181	0.24	-0.0574	0.192	-0.0628	0.197	0.0679	-0.155	0.378	-0.114	-0.358	0.413	0.0593	0	-0.316	-0.21
16033	P25713	F7C8V1	tr|F7C8V1|F7C8V1_MACMU	MT3	1.04	0.944	0.615	-0.15	0.41	-0.168	-0.321	-0.319	-0.803	-0.628	0.68	0.344	0.0781	0.278	-0.133	-0.0248	0	0.493	-0.908
12134	P25774	F7B4I9	tr|F7B4I9|F7B4I9_MACMU	CTSS	-0.36	-0.184	-0.107	-0.228	-0.155	0.372	-0.0793	0.0311	0.00677	-0.029	0.258	-0.435	0.0057	0	0.0215	0.474	0.471	-0.0421	0.249
12003	P25786	F7GF95	tr|F7GF95|F7GF95_MACMU	PSMA1	NA	NA	NA	NA	NA	NA	NA	NA	NA	NA	NA	NA	NA	NA	NA	-0.198	0.896	-0.202	0.198
12783	P25787	F7AC21	tr|F7AC21|F7AC21_MACMU	PSMA2	0.0179	0.0574	0.091	0.45	0.0384	-0.17	0.0219	0.142	-0.107	0.354	-0.149	-0.163	-0.483	0	0.0169	-0.24	-0.461	-0.621	-0.238
12286	P25788	F7E2S4	tr|F7E2S4|F7E2S4_MACMU	PSMA3	-0.303	-0.084	0.549	0.152	0.252	0.253	-0.0688	0.78	0.0221	0.505	-0.0642	-0.131	0.0521	0	0.237	-0.515	-0.133	-0.868	-0.43
12164	P25789	F7G176	tr|F7G176|F7G176_MACMU	PSMA4	-0.247	-0.204	0.215	-0.066	0.0232	0.211	-0.314	0.328	-0.0458	0.264	0.075	-0.316	-0.00975	-0.0902	0.115	0	0.124	0.0577	-0.235
15867	P25815	F6PWQ7	tr|F6PWQ7|F6PWQ7_MACMU	S100P	-0.438	-0.11	-0.0111	0.291	-0.0339	0.0111	0.63	1.47	NA	NA	NA	NA	NA	NA	NA	NA	NA	NA	NA
11145	P25874	F6VUL7	tr|F6VUL7|F6VUL7_MACMU	UCP1	NA	NA	NA	NA	NA	NA	NA	NA	NA	NA	NA	NA	NA	NA	NA	0.614	-0.0777	0.0777	-0.496
13762	P25942	F6SNI1	tr|F6SNI1|F6SNI1_MACMU	CD40	NA	NA	NA	NA	NA	NA	NA	NA	NA	NA	NA	NA	NA	NA	NA	0.157	-0.368	-0.157	0.222
2728	P26012	F7F3K9	tr|F7F3K9|F7F3K9_MACMU	ITGB8	-0.498	0.0664	-0.136	-0.879	-0.143	0.0441	0.0384	0.168	NA	NA	NA	NA	NA	NA	NA	0.0434	0.24	-0.0384	-0.0978
9106	P26022	F6U8M6	tr|F6U8M6|F6U8M6_MACMU	PTX3	-1.08	-0.107	-0.0246	0.682	0.238	0.417	-0.571	0.235	0	0.0829	-0.25	-0.322	-0.0592	-0.403	0.12	0.478	0.15	0.223	-0.199
5182	P26038	F6RKW0	tr|F6RKW0|F6RKW0_MACMU	MSN	0.136	0	0.109	0.205	0.021	0.0994	-0.0137	0.569	-0.0523	0.231	0.0168	-0.369	-0.0468	-0.154	-0.0624	0.128	-0.0748	-0.279	-0.258
13455	P26373	F6XL94	tr|F6XL94|F6XL94_MACMU	RPL13	NA	NA	NA	NA	NA	NA	NA	NA	0.174	0	-0.0883	-0.0387	-0.214	0.00995	-0.153	-0.0459	0.000774	0.404	0.0287
8018	P26440	F7BAE1	tr|F7BAE1|F7BAE1_MACMU	IVD	NA	NA	NA	NA	NA	NA	NA	NA	NA	NA	NA	NA	NA	NA	NA	0.322	-0.0846	0.0846	-0.956
15689	P26447	F7GDB8	tr|F7GDB8|F7GDB8_MACMU	S100A4	-0.339	-0.231	0	0.418	0.0477	0.691	0.214	1.26	0.0433	0.168	-0.173	-0.371	-0.013	0.356	0.00749	-0.539	-0.25	-0.622	-0.00493
7247	P26641	F7HML3	tr|F7HML3|F7HML3_MACMU	EEF1G	0.391	0.704	0.441	0.561	0.482	-0.224	-0.236	-0.144	0.474	0.0753	0.0564	-0.0352	-0.0448	-0.0575	0.24	-0.121	0	-0.471	-0.339
8696	P26992	F7HC46	tr|F7HC46|F7HC46_MACMU	CNTFR	-0.0646	-0.132	0	-0.0791	-0.0229	0.191	-0.0699	-0.174	0.15	-0.304	0.018	0.0568	0.0336	0.49	-0.0676	0.0414	0.258	0.637	-0.0415
9542	P27169	F7H7J8	tr|F7H7J8|F7H7J8_MACMU	PON1	-0.465	-0.0191	0.635	-0.0796	0.0105	-0.399	0.546	0.34	0.293	0.0218	0	0.165	-0.238	-0.319	0.426	-0.448	-0.00623	-0.589	0.028
12646	P27348	F7H4H9	tr|F7H4H9|F7H4H9_MACMU	YWHAQ	1.09	1.46	0.861	0.884	0.909	-0.737	-0.906	-1.22	-0.863	-0.0799	0.717	0.394	0	0.0551	0.00403	-0.203	-0.831	-0.569	-0.637
10191	P27361	F7EZA7	tr|F7EZA7|F7EZA7_MACMU	MAPK3	NA	NA	NA	NA	NA	NA	NA	NA	NA	NA	NA	NA	NA	NA	NA	0.14	-0.14	1.11	-0.169
7451	P27797	F7FMQ2	tr|F7FMQ2|F7FMQ2_MACMU	CALR	0.256	0.198	-0.104	0.172	0.226	-0.318	-0.306	-0.505	-0.148	-0.334	0.154	0.0548	-0.139	0.253	-0.53	0.0182	0	0.362	-0.137
2254	P27816	F7HR85	tr|F7HR85|F7HR85_MACMU	MAP4	0.324	0.203	0.0995	0.325	-0.148	0.0482	-0.0207	-0.36	-0.431	0.0464	0	-0.195	0.21	0.0691	0.569	-0.223	-0.434	-0.323	-0.498
4453	P27824	F7EFA2	tr|F7EFA2|F7EFA2_MACMU	CANX	-0.636	-0.299	-0.139	0.555	-0.212	0.186	0.026	0.712	0.0485	-0.0805	0	0.132	-0.125	0.263	0.222	-0.753	0.501	-0.738	-0.227
7647	P27918	F7CGG5	tr|F7CGG5|F7CGG5_MACMU	CFP	-0.313	0.179	0.138	-0.249	-0.0904	-0.0838	0.345	0.664	0.21	0.126	0.116	0.371	-0.347	-0.459	0	0.255	-0.204	-0.229	-0.073
8630	P27930	Q8HXR9	tr|Q8HXR9|Q8HXR9_MACMU	IL1R2	-0.264	0.072	0.205	-0.198	-0.206	-0.119	0.343	0.0565	-0.334	0.11	-0.366	0.404	-0.214	-0.241	0.114	0	-0.209	0.103	0.417
4973	P28039	F6XGH3	tr|F6XGH3|F6XGH3_MACMU	AOAH	NA	NA	NA	NA	NA	NA	NA	NA	0.354	-0.265	0.16	-0.557	-0.109	-0.00101	-0.415	0.351	0.149	0.382	0
13269	P28065	F6UNF6	tr|F6UNF6|F6UNF6_MACMU	PSMB9	-0.146	0.125	0.126	0.184	0	0.454	0.00301	0.691	0.0536	0.453	-0.152	-0.632	-0.136	-0.081	0.0492	-0.638	-0.385	-0.516	-0.261
12742	P28066	F6VLE9	tr|F6VLE9|F6VLE9_MACMU	PSMA5	-0.417	-0.296	0.522	0.218	0.298	-0.193	0.229	0.865	0.265	0.505	-0.00331	0	-0.146	-0.389	0.172	-0.269	0.0299	-0.572	-0.127
12029	P28070	F7H4P3	tr|F7H4P3|F7H4P3_MACMU	PSMB4	-0.585	-0.149	0.675	0.109	0.284	1.63	-0.0119	0.885	0	0.277	-0.169	0.0693	0.587	-0.0621	0.652	-0.242	-0.0175	-0.162	-0.0479
12714	P28072	F7HR46	tr|F7HR46|F7HR46_MACMU	PSMB6	-0.381	-0.0656	0.892	0.239	0.66	-0.247	-0.28	0.898	-0.268	0.368	0.0116	0.232	-0.226	0.0732	0.358	0	-0.458	-0.277	-0.325
12018	P28074	F6UDF6	tr|F6UDF6|F6UDF6_MACMU	PSMB5	0.343	-0.0568	0.659	0.181	0.48	-0.529	-0.268	0.429	0.287	0	0.1	-0.00103	0.228	-0.204	-0.0212	-0.288	0.0969	-0.28	-0.349
9528	P28289	F7DS60	tr|F7DS60|F7DS60_MACMU	TMOD1	NA	NA	NA	NA	NA	NA	NA	NA	0.417	0.645	0	1.05	-0.489	-0.248	-0.377	NA	NA	NA	NA
7590	P28300	F7HIF3	tr|F7HIF3|F7HIF3_MACMU	LOX	-0.182	-0.0308	0.37	0.299	-0.0632	0.424	0.546	0.65	NA	NA	NA	NA	NA	NA	NA	-0.0522	0.0308	-0.27	-0.166
9067	P28482	F7ECR3	tr|F7ECR3|F7ECR3_MACMU	MAPK1	0.364	0.21	0.164	0.369	0.115	-0.223	-0.314	-0.376	-0.599	0.131	0.182	-0.0776	0	-0.17	0.075	-0.529	0.0642	-0.0643	-0.278
13412	P28676	F7B9J4	tr|F7B9J4|F7B9J4_MACMU	GCA	-0.424	-0.486	0.627	-0.259	0	0.5	0.314	2.49	0.127	1.58	-0.198	-0.321	-1.11	-0.171	0.919	NA	NA	NA	NA
7833	P28799	F7HAM9	tr|F7HAM9|F7HAM9_MACMU	GRN	-0.287	-0.33	0.00571	-0.698	-0.208	0.104	-0.348	0.0743	-0.412	0.0645	-0.148	0.0168	-0.494	0	-0.32	0.191	0.151	0.199	0.082
917	P28827	F6RJ58	tr|F6RJ58|F6RJ58_MACMU	PTPRM	-0.416	-0.477	-0.15	0	-0.202	0.857	-0.0618	-0.0283	0.273	0.109	-0.0132	-0.182	0.186	0.212	0.013	-0.00498	0.201	0.267	0.327
5982	P28838	F6TQJ2	tr|F6TQJ2|F6TQJ2_MACMU	LAP3	0.216	0.42	0.0932	0.357	-0.0563	0.099	-0.137	-0.193	-0.142	0	0.236	-0.217	0.0422	-0.117	0.262	0.196	-0.191	-0.0942	-0.254
11219	P28907	F6QEE7	tr|F6QEE7|F6QEE7_MACMU	CD38	NA	NA	NA	NA	NA	NA	NA	NA	0.00723	0.0973	-0.194	-0.286	0.0882	0	-0.0123	NA	NA	NA	NA
8322	P28908	F7HS04	tr|F7HS04|F7HS04_MACMU	TNFRSF8	NA	NA	NA	NA	NA	NA	NA	NA	NA	NA	NA	NA	NA	NA	NA	-0.6	0.126	1.01	-0.126
3400	P29120	F7DCC0	tr|F7DCC0|F7DCC0_MACMU	PCSK1	0.174	0.243	-0.257	0	-0.153	-0.037	-0.0553	-0.369	0.0653	-0.0181	0.0408	0.506	-0.086	0.303	-0.596	-0.0103	0.128	1.01	0.204
963	P29144	F7HFA8	tr|F7HFA8|F7HFA8_MACMU	TPP2	NA	NA	NA	NA	NA	NA	NA	NA	NA	NA	NA	NA	NA	NA	NA	-0.151	1.01	-0.174	0.151
11839	P29218	F7H7A7	tr|F7H7A7|F7H7A7_MACMU	IMPA1	0.496	0	-0.124	0.376	-0.328	0.489	-0.356	-0.206	-0.313	-0.0542	0.959	-0.484	-0.136	0.181	0.21	1.03	0.556	0.344	-0.178
11722	P29279	F7BV52	tr|F7BV52|F7BV52_MACMU	CTGF	-0.225	-0.198	0.0158	0	0.0787	-0.0976	0.0578	-0.119	-0.026	-0.087	-0.0517	-0.161	-0.118	0.0138	0.141	0.134	0.191	0.44	0.331
5299	P29350	F6SIN0	tr|F6SIN0|F6SIN0_MACMU	PTPN6	NA	NA	NA	NA	NA	NA	NA	NA	0.261	0.134	-0.217	-0.0337	-0.183	0	0.00611	-0.273	0.498	-0.0116	0.094
6969	P29371	Q2WGM0	tr|Q2WGM0|Q2WGM0_MACMU	TACR3	-0.719	-0.482	0.0744	0.34	-0.311	3.31	-0.0744	0.921	NA	NA	NA	NA	NA	NA	NA	NA	NA	NA	NA
15049	P29373	F7AFL8	tr|F7AFL8|F7AFL8_MACMU	CRABP2	NA	NA	NA	NA	NA	NA	NA	NA	-0.0859	0.297	0.236	-0.424	0.38	-0.0111	0.249	-0.0421	-0.0128	0	0.0857
1036	P29374	F7E2A7	tr|F7E2A7|F7E2A7_MACMU	ARID4A	NA	NA	NA	NA	NA	NA	NA	NA	0	-0.642	-0.422	-0.195	0.014	0.443	0.454	NA	NA	NA	NA
4589	P29401	F7BHR1	tr|F7BHR1|F7BHR1_MACMU	TKT	0	0.0977	0.0338	0.585	0.0351	-0.0563	-0.148	1.1	-0.0918	0.286	0.245	-0.22	-0.11	-0.279	0.316	0.228	-0.571	-0.61	-0.868
7960	P29622	F6UJL8	tr|F6UJL8|F6UJL8_MACMU	SERPINA4	-0.574	-0.186	0.403	0.0762	0.00539	-0.0566	0.203	0.17	0.291	0.0167	-0.13	0.269	-0.378	-0.335	0.267	-0.142	-0.281	-0.228	0
15007	P29762	F7HEV1	tr|F7HEV1|F7HEV1_MACMU	CRABP1	0.0448	0.654	-0.182	1.16	-0.13	0.0591	0.0835	-0.0811	-0.292	0.322	0.406	-0.469	0	0.59	-0.0836	-0.272	-0.331	-0.217	0.24
10648	P29966	F7EW39	tr|F7EW39|F7EW39_MACMU	MARCKS	0.618	0.649	0.492	0.0415	0.391	-0.151	-0.114	-0.051	-0.142	-0.222	0.0823	0.752	0.104	0	-0.133	-0.0624	0.255	-0.197	-0.155
4353	P29973	F6W1I8	tr|F6W1I8|F6W1I8_MACMU	CNGA1	-0.659	-1.36	1.35	-1.49	1.24	-1.17	1.15	0.0682	0.157	0	-0.302	0.238	-0.306	-0.306	0.255	NA	NA	NA	NA
11664	P30039	F6ULX2	tr|F6ULX2|F6ULX2_MACMU	PBLD	NA	NA	NA	NA	NA	NA	NA	NA	-0.0602	0.98	0.82	-0.59	0.151	0.405	-0.0702	-0.0607	0.344	-0.213	0
12324	P30040	F6QVU7	tr|F6QVU7|F6QVU7_MACMU	ERP29	0	-0.0223	0.0979	0.517	0.272	0.367	0.0149	0.224	-0.065	0.342	-0.112	-0.031	0.135	-0.0458	0.354	-0.33	-0.25	-0.398	-0.322
13013	P30041	F7F6H0	tr|F7F6H0|F7F6H0_MACMU	PRDX6	0.379	0.289	0.0602	0.647	-0.198	-0.273	-0.132	-0.122	-0.277	0.129	0	-0.239	0.21	0.0436	0.244	-0.142	0.0389	-0.289	-0.0841
12430	P30042	F7EQI2	tr|F7EQI2|F7EQI2_MACMU	C21orf33	1.06	-0.239	0.48	1	0.62	0.016	-0.421	-0.555	-0.868	0	1.33	0.468	0.0592	-0.0404	-0.0694	0.484	-0.307	-0.0558	-0.64
14119	P30043	F6T739	tr|F6T739|F6T739_MACMU	BLVRB	-0.366	-0.0929	-0.244	1.13	-0.292	0	0.00784	0.603	-0.156	0.366	0.0646	-0.377	0.314	0.865	-0.147	-0.83	0.545	-0.683	0.0549
15380	P30044	H9H3L9	tr|H9H3L9|H9H3L9_MACMU	PRDX5	0.561	0.542	0.0535	0.7	-0.0867	0.228	-0.0404	0	-0.162	0.201	0.206	-0.184	0.143	-0.0801	0.297	-0.0364	-0.599	-0.203	-0.342
12332	P30048	F7H945	tr|F7H945|F7H945_MACMU	PRDX3	1.21	0.681	0.35	0.76	0.864	-0.532	-0.657	-0.832	-0.433	-0.0986	0.759	0.664	0	0.115	-0.299	0.419	-0.476	-0.306	-0.707
14696	P30049	F7ERL9	tr|F7ERL9|F7ERL9_MACMU	ATP5D	0.871	0.161	0.219	0.346	0.115	0	-0.136	-0.328	-0.949	-0.249	0.605	1.02	0.851	0.414	-0.143	-0.0482	-0.217	-0.0324	-0.0986
14503	P30050	F7AD35	tr|F7AD35|F7AD35_MACMU	RPL12	NA	NA	NA	NA	NA	NA	NA	NA	NA	NA	NA	NA	NA	NA	NA	0.0208	-0.779	-0.0208	0.0992
13717	P30085	F7H6T9	tr|F7H6T9|F7H6T9_MACMU	CMPK1	0.431	0.561	0.124	0.61	-0.0654	-0.0195	0	-0.549	-0.156	0.281	0.677	-0.279	0.332	0.133	0.303	-0.145	-0.154	-0.39	-0.15
13824	P30086	F5CI18	tr|F5CI18|F5CI18_MACMU	PEBP1	0.698	0.802	0.373	0.802	0.703	-0.43	-0.474	-0.391	-0.564	0	1.2	0.188	0.284	-0.0487	-0.099	0.108	-0.105	-0.32	-0.238
6082	P30101	F7G3A7	tr|F7G3A7|F7G3A7_MACMU	PDIA3	-0.165	-0.131	-0.0772	0.282	0.393	0.11	-0.158	0.104	0.19	0.0238	0	-0.0259	-0.136	-0.0323	-0.088	0.0586	0.159	0.0475	-0.136
5026	P30153	F6RRV0	tr|F6RRV0|F6RRV0_MACMU	PPP2R1A	0.685	0.736	-0.00137	0.733	-0.0828	0	-0.212	-0.45	-0.357	0.0791	0.253	-0.217	0.165	0.147	0.0292	0.267	-0.227	-0.0398	-0.18
12221	P30301	F6RG83	tr|F6RG83|F6RG83_MACMU	MIP	NA	NA	NA	NA	NA	NA	NA	NA	0	0.104	-0.191	0.194	-0.414	-0.75	0.221	NA	NA	NA	NA
10087	P30511	P33617	sp|P33617|HLAF_MACMU	HLA-F	NA	NA	NA	NA	NA	NA	NA	NA	-0.047	0.338	-0.608	0.354	0.152	-0.322	-0.18	0.0999	-0.327	0	0.0964
7073	P30520	F7HTL0	tr|F7HTL0|F7HTL0_MACMU	ADSS	-0.0401	-0.0571	0	0.99	0.19	0.0626	0.0942	0.0889	0.121	-0.00931	-0.189	0.19	-0.0305	0.226	0.225	-0.576	-0.174	-0.301	-0.159
4432	P30530	F7E4X5	tr|F7E4X5|F7E4X5_MACMU	AXL	-0.000157	0.235	0.167	0.148	0	-0.173	-0.0724	-0.0929	0.0278	-0.134	0.407	-0.0107	-0.0287	0.0617	-0.207	0.39	-0.114	0.252	0.00413
4505	P30531	F6WVM8	tr|F6WVM8|F6WVM8_MACMU	SLC6A1	0.243	0.069	-0.29	-0.0226	0.0574	0.0513	-0.242	-0.519	-0.163	-0.429	-0.198	0.105	0.176	0.265	-0.403	0	-0.163	0.3	0.0547
9812	P30533	F7DRI7	tr|F7DRI7|F7DRI7_MACMU	LRPAP1	NA	NA	NA	NA	NA	NA	NA	NA	NA	NA	NA	NA	NA	NA	NA	0.0429	-0.00302	0.00302	-0.133
9343	P30556	F6WLD6	tr|F6WLD6|F6WLD6_MACMU	AGTR1	NA	NA	NA	NA	NA	NA	NA	NA	0.446	-0.386	0	0.455	-0.311	-1.01	0.785	NA	NA	NA	NA
10180	P30566	F7GGV1	tr|F7GGV1|F7GGV1_MACMU	ADSL	NA	NA	NA	NA	NA	NA	NA	NA	-1.2	0.398	-0.0264	0	-0.0351	0.111	0.646	NA	NA	NA	NA
5459	P30613	F7FI39	tr|F7FI39|F7FI39_MACMU	PKLR	-0.424	0.00935	-0.477	-0.029	-0.0808	0	1.15	0.44	0	-0.0456	-0.765	-0.154	0.118	0.864	0.123	-0.168	0.606	-0.361	0.108
13482	P30626	F7GSM8	tr|F7GSM8|F7GSM8_MACMU	SRI	-0.801	-0.106	1.13	0.496	-0.232	0.767	-1.21	1.19	0.144	0.325	-0.352	0	-0.00344	0.0276	0.0286	-0.427	0.0126	-0.487	-0.173
9283	P30740	F7HA34	tr|F7HA34|F7HA34_MACMU	SERPINB1	-0.0516	0	0.295	0.16	0.167	0.0574	0.48	0.946	-0.0257	0.875	0.0718	-0.186	-0.454	-0.297	0.152	-0.271	-0.343	-0.0876	-0.351
5987	P30837	F7H5N9	tr|F7H5N9|F7H5N9_MACMU	ALDH1B1	NA	NA	NA	NA	NA	NA	NA	NA	NA	NA	NA	NA	NA	NA	NA	0.172	-0.127	0.127	-0.159
14566	P31025	F7EWI5	tr|F7EWI5|F7EWI5_MACMU	LCN1	NA	NA	NA	NA	NA	NA	NA	NA	NA	NA	NA	NA	NA	NA	NA	0.00051	-0.0612	0.47	-0.00051
8041	P31040	F6RSN8	tr|F6RSN8|F6RSN8_MACMU	SDHA	NA	NA	NA	NA	NA	NA	NA	NA	NA	NA	NA	NA	NA	NA	NA	1.08	-0.35	0.0637	-0.0637
7556	P31146	F7EE72	tr|F7EE72|F7EE72_MACMU	CORO1A	0.00562	-0.128	0.185	-0.155	0.403	0.322	0.199	1.44	0.0272	0.62	-0.0969	-0.17	-0.172	0.0392	0	-0.383	-0.526	-0.138	-0.482
7185	P31150	F7FLQ1	tr|F7FLQ1|F7FLQ1_MACMU	GDI1	0.707	0.825	0.695	0.696	0.826	-0.321	-0.334	-0.51	-0.404	-0.0159	0.995	0.54	0.17	0.219	0	-0.129	-0.0341	-0.204	-0.188
16172	P31151	F6QJ52	tr|F6QJ52|F6QJ52_MACMU	S100A7	NA	NA	NA	NA	NA	NA	NA	NA	0.407	0.355	-0.491	0	-0.0574	-0.143	0.203	NA	NA	NA	NA
9070	P31153	F7GN04	tr|F7GN04|F7GN04_MACMU	MAT2A	0.434	0.622	0.387	0.696	0.49	-0.0579	-0.528	-0.374	0.0447	0	0.099	0.097	-0.0184	-0.172	0.105	-0.323	-0.306	-0.0734	-0.227
8107	P31323	F6Q503	tr|F6Q503|F6Q503_MACMU	PRKAR2B	NA	NA	NA	NA	NA	NA	NA	NA	-1.45	0.382	0.207	0.121	-0.0899	0	0.483	0.333	-2.12	-0.95	-0.157
14040	P31431	F7FE95	tr|F7FE95|F7FE95_MACMU	SDC4	NA	NA	NA	NA	NA	NA	NA	NA	-0.0576	-0.166	0.259	-0.268	0.13	-0.043	0	0.265	-0.00168	0.215	0.154
6719	P31930	F7GSG0	tr|F7GSG0|F7GSG0_MACMU	UQCRC1	NA	NA	NA	NA	NA	NA	NA	NA	NA	NA	NA	NA	NA	NA	NA	0.574	0.00535	-0.00535	-0.616
11005	P31937	F7DFR4	tr|F7DFR4|F7DFR4_MACMU	HIBADH	-0.127	-0.0162	0.0442	0.0286	0.0106	0.158	-0.0242	0.0581	0	-0.201	-0.107	-0.0814	0.174	-0.192	0.497	0.054	-0.0699	0.256	-0.521
5053	P31939	F7DFY8	tr|F7DFY8|F7DFY8_MACMU	ATIC	0.307	0.521	0.192	0.877	-0.112	-0.126	0.221	-0.231	-0.0244	0.266	-0.0101	-0.0546	0.0673	0.335	0	-0.126	0.0993	-0.581	-0.0108
9025	P31942	F6Y030	tr|F6Y030|F6Y030_MACMU	HNRNPH3	0.015	-0.108	-0.0632	-0.206	0.0875	-0.0644	0.334	0.0779	NA	NA	NA	NA	NA	NA	NA	0.129	0.0815	-0.015	-0.161
12574	P31946	F6XFG9	tr|F6XFG9|F6XFG9_MACMU	YWHAB	0.923	1.1	0.857	0.893	0.99	-0.288	-0.678	-0.354	-0.541	0	0.974	0.741	0.00984	0.164	-0.0161	-0.332	-0.198	-0.47	-0.456
5856	P31948	F7GVS6	tr|F7GVS6|F7GVS6_MACMU	STIP1	-0.0123	0.0757	0.0483	0.384	-0.116	0.0533	0.198	0.0197	-0.418	0	-0.0675	-0.539	0.121	0.0628	-0.0515	-0.166	0.0296	-0.4	-0.289
15705	P31949	F7GN53	tr|F7GN53|F7GN53_MACMU	S100A11	-0.305	0.253	0.167	0.206	0.109	0.443	0.0606	1.81	0	0.774	-0.0314	-0.449	-0.384	-0.14	0.258	-0.48	-0.393	-0.77	-0.368
11055	P31994	F7GVR2	tr|F7GVR2|F7GVR2_MACMU	FCGR2B	0.0546	0.408	0.847	0.133	-0.251	-0.0324	0	-0.0995	-0.163	-0.449	0.356	0.554	1.03	-0.353	-0.655	NA	NA	NA	NA
13592	P32119	F6U5B4	tr|F6U5B4|F6U5B4_MACMU	PRDX2	0.136	-0.292	-0.199	0.992	-0.15	-0.399	-0.346	0.983	-0.193	0.604	0.0623	-0.832	0.428	0.958	0.287	-0.994	0.757	-1.07	0
14804	P32320	F7B5K3	tr|F7B5K3|F7B5K3_MACMU	CDA	-0.168	0.0421	-0.123	0.401	-0.397	-0.0328	0.0995	1.84	0.346	1.17	-0.154	-0.55	0.0204	-0.202	-0.155	0.188	0	0.28	-0.204
5290	P32455	F7A8B5	tr|F7A8B5|F7A8B5_MACMU	GBP1	-0.106	0	0.206	0.153	-0.0329	0.344	0.286	0.166	0.0279	0.279	-0.422	-0.435	-0.0176	-0.223	-0.0397	-0.387	-0.391	0.778	0.22
6438	P32942	F7BCX9	tr|F7BCX9|F7BCX9_MACMU	ICAM3	-1.11	1.02	0	-0.019	-0.213	0.426	0.498	1.25	-0.164	-0.257	-0.121	0.56	0.297	0.164	-0.173	NA	NA	NA	NA
4052	P33121	F7HTT3	tr|F7HTT3|F7HTT3_MACMU	ACSL1	-0.0499	0.437	-0.00394	-0.0998	0	0.271	0.0556	0.194	-0.243	-0.289	0.306	0.952	0.153	-0.223	-0.156	0.77	-0.372	0.162	-0.525
2913	P33151	F7DX07	tr|F7DX07|F7DX07_MACMU	CDH5	0.0016	-0.242	-0.164	-0.106	-0.229	0.0481	0.257	0.261	0.179	0.108	-0.0558	-0.00656	-0.15	-0.00744	0.017	0.12	0	-0.195	0.151
12930	P33241	F7EH63	tr|F7EH63|F7EH63_MACMU	LSP1	0.055	-0.184	0.211	0.00221	0.411	0.615	0	0.594	0.0133	0.294	-0.111	-0.3	-0.0641	-0.0638	-0.0511	-0.197	-0.156	-0.336	0.257
4726	P33908	F6YY29	tr|F6YY29|F6YY29_MACMU	MAN1A1	0.119	0.0459	-0.0621	-0.0463	-0.144	0.144	0	0.031	-0.00433	-0.0782	-0.0131	-0.0887	0.134	0.237	-0.214	0.199	0.158	0.402	-0.00376
7662	P34059	F7DJ55	tr|F7DJ55|F7DJ55_MACMU	GALNS	0.0766	0.0884	0.121	-0.28	-0.188	0.048	-0.271	-0.254	0.412	-0.0188	-0.106	0	-0.0996	-0.235	0.078	0.465	0.542	-0.308	0.0903
14755	P34096	F7FYP1	tr|F7FYP1|F7FYP1_MACMU	RNASE4	-0.674	-0.55	0.00383	-0.66	0	0.501	-0.22	-0.403	-0.523	-0.242	0.0724	-0.522	0.00942	0.0474	-0.269	0.0061	0.0698	0.203	0.269
13850	P34741	F6QQP9	tr|F6QQP9|F6QQP9_MACMU	SDC2	NA	NA	NA	NA	NA	NA	NA	NA	NA	NA	NA	NA	NA	NA	NA	-0.172	0.341	0.172	-0.286
5649	P34913	F7FFT0	tr|F7FFT0|F7FFT0_MACMU	EPHX2	NA	NA	NA	NA	NA	NA	NA	NA	NA	NA	NA	NA	NA	NA	NA	0.129	-0.129	0.269	-0.449
4386	P34931	F7CZ86	tr|F7CZ86|F7CZ86_MACMU	HSPA1L	0.57	0.417	0.163	0.333	0	-0.397	-0.459	0.012	-0.597	-0.338	0.822	-0.178	0.00239	-0.129	0.0304	0.0807	-0.0421	-0.0549	-0.323
2541	P34932	F6XAP8	tr|F6XAP8|F6XAP8_MACMU	HSPA4	-0.116	0.165	0	0.25	0.469	0.507	-0.322	-0.105	-0.562	0.0319	0.423	-0.168	0.0325	-0.134	-0.0613	0.192	-0.24	0.0205	-0.245
13146	P34949	F7C2W8	tr|F7C2W8|F7C2W8_MACMU	MPI	0.17	0.203	0.108	0.241	0.181	-0.31	-0.13	-0.521	NA	NA	NA	NA	NA	NA	NA	-0.0367	-0.258	0.0367	-0.0923
5387	P35052	F6VPW9	tr|F6VPW9|F6VPW9_MACMU	GPC1	0	0.0663	0.146	-0.174	0.0116	-0.00949	-0.0642	0.0215	0.248	-0.31	-0.202	-0.239	0.193	-0.00341	-0.372	0.0888	0.393	0.556	-0.0416
14881	P35080	F7EGP4	tr|F7EGP4|F7EGP4_MACMU	PFN2	0.186	0.439	0	0.169	0.0224	-0.27	-0.144	-0.162	-0.181	-0.216	0.667	-0.272	0.266	0.0843	-0.122	-0.482	0.0459	0.143	-0.275
10974	P35219	F7HSA2	tr|F7HSA2|F7HSA2_MACMU	CA8	0.487	0.794	-0.0646	0.0202	-0.154	0.368	-0.0202	-0.0876	NA	NA	NA	NA	NA	NA	NA	0.115	-0.215	0.122	-0.0703
9540	P35227	F7EIY7	tr|F7EIY7|F7EIY7_MACMU	PCGF2	-0.646	0.609	-0.167	-0.199	0.167	1.6	0.502	-1.27	NA	NA	NA	NA	NA	NA	NA	NA	NA	NA	NA
4962	P35241	F6VZ13	tr|F6VZ13|F6VZ13_MACMU	RDX	0.0668	0.0671	0.108	0.217	-0.0427	0.055	0	0.457	-0.288	0.321	-0.00886	-0.685	-0.196	-0.299	-0.156	0.21	0.0151	-0.156	-0.0766
15281	P35268	F7H615	tr|F7H615|F7H615_MACMU	RPL22	NA	NA	NA	NA	NA	NA	NA	NA	NA	NA	NA	NA	NA	NA	NA	-1.52	0.22	-0.22	0.368
12407	P35270	F6YUE9	tr|F6YUE9|F6YUE9_MACMU	SPR	NA	NA	NA	NA	NA	NA	NA	NA	-0.165	-0.0446	-0.00589	0	0.076	0.161	0.121	0.388	-0.0831	0.118	-0.581
14227	P35318	F7G2P0	tr|F7G2P0|F7G2P0_MACMU	ADM	0.135	-0.172	-0.208	-0.133	-0.469	0.159	0.0238	0.134	-0.0259	-0.0148	-0.251	-0.0108	0	0.144	-0.133	0.283	0.0477	0.978	0.0814
1084	P35442	F7H1T8	tr|F7H1T8|F7H1T8_MACMU	THBS2	0.288	0.246	-0.0437	-0.232	0.0546	-0.29	-0.138	-0.15	-0.239	-0.0612	0.224	0.0203	0	-0.0927	-0.202	0.146	0.11	0.481	0.115
1685	P35443	F7EPG2	tr|F7EPG2|F7EPG2_MACMU	THBS4	-0.445	-0.287	-0.0164	-0.146	-0.125	0.493	0.29	0.156	0.0945	0.057	-0.143	-0.0649	0	-0.254	0.135	-0.0125	0.0521	0.0765	0.109
6202	P35475	F7GP96	tr|F7GP96|F7GP96_MACMU	IDUA	0.112	-0.323	0.175	-0.512	0.521	-0.00255	0.0364	-0.16	0.424	-0.423	0.27	-0.135	-0.364	-0.0979	0.0399	-0.0767	0.233	0.216	0
5196	P35527	F6UR30	tr|F6UR30|F6UR30_MACMU	KRT9	-0.164	0.0514	-0.0722	0.141	-0.194	0.48	0	0.21	0.115	-0.0112	-0.0758	0.234	-0.186	-0.491	0.641	1.19	-0.00498	0.226	-0.0652
15473	P35542	F6V9Q5	tr|F6V9Q5|F6V9Q5_MACMU	SAA4	-0.236	-0.317	0	-0.162	-0.0568	-0.22	0.995	0.796	0.338	0.248	-0.793	0.321	0.137	0.0257	0.5	-0.752	-0.578	-0.654	0.0971
63	P35555	F6YVP3	tr|F6YVP3|F6YVP3_MACMU	FBN1	0.0797	-0.151	-0.268	-0.161	-0.0156	0.346	-0.0301	0.222	0.0173	-0.136	-0.0489	-0.00556	-0.0408	0.00374	0	0.293	0.355	0.0167	0.0523
4312	P35558	F6ZDT7	tr|F6ZDT7|F6ZDT7_MACMU	PCK1	NA	NA	NA	NA	NA	NA	NA	NA	NA	NA	NA	NA	NA	NA	NA	0.553	-0.139	0.139	-0.373
462	P35579	F7B7D7	tr|F7B7D7|F7B7D7_MACMU	MYH9	-0.564	-0.332	-0.144	-0.254	0.0179	-0.0605	0.101	0.787	0.0418	0.124	-0.0349	-0.418	0	0.0238	0.0327	-0.122	0.255	-0.191	0.0309
1195	P35590	F7B4Q3	tr|F7B4Q3|F7B4Q3_MACMU	TIE1	-0.285	-0.159	-0.0395	-0.191	0	0.121	-0.0192	0.0395	0.158	0.0485	0.184	0.0573	-0.244	-0.0887	-0.0288	0.344	-0.257	0.453	0.191
2177	P35609	F7GBD5	tr|F7GBD5|F7GBD5_MACMU	ACTN2	-0.0176	-0.00524	-0.232	0.0696	-0.119	0.739	0.283	0.00524	NA	NA	NA	NA	NA	NA	NA	NA	NA	NA	NA
3403	P35612	F7CGX1	tr|F7CGX1|F7CGX1_MACMU	ADD2	-0.0186	0.344	0.0172	0	0.189	0.0413	-0.0245	-0.266	-0.293	-0.16	0.144	0.346	0.112	0.343	-0.109	-0.263	0.215	-0.349	-0.00795
9607	P35613	F6Y3S7	tr|F6Y3S7|F6Y3S7_MACMU	BSG	0.0551	-0.0286	-0.321	0.171	-0.157	-0.0838	0.0346	0.102	0.00514	-0.117	0.000742	-0.0342	-0.106	-0.0693	-0.0936	0.121	0	0.305	0.133
15690	P35754	F7GJV9	tr|F7GJV9|F7GJV9_MACMU	GLRX	0.24	0.264	-0.0507	0.286	0.0246	-0.267	-0.0773	0.243	-0.155	-0.013	0.281	0	0.0561	0.144	-0.157	-0.0186	0.00169	-0.0244	-0.218
8475	P35813	F7BNQ9	tr|F7BNQ9|F7BNQ9_MACMU	PPM1A	0.318	0.305	0.113	0.312	0.107	0.321	-0.12	-0.177	0.279	0.261	-0.408	0.452	-0.204	-0.427	-0.0433	-0.0956	0	-0.238	-0.214
4935	P35858	F6Y7Q4	tr|F6Y7Q4|F6Y7Q4_MACMU	IGFALS	-0.494	-0.392	0.0671	0.063	-0.0029	0	0.425	0.61	0.217	0.0755	-0.142	0.338	-0.025	-0.367	0.459	-0.188	0.0549	-0.546	-0.0749
4688	P35908	F7AEK9	tr|F7AEK9|F7AEK9_MACMU	KRT2	0.0383	0.119	-0.0109	-0.275	-0.29	0.882	-0.217	0	-0.141	-0.357	0.813	-0.194	1.51	-0.572	0.228	0.827	2	-0.135	0.181
786	P35968	F7E313	tr|F7E313|F7E313_MACMU	KDR	NA	NA	NA	NA	NA	NA	NA	NA	0	0.098	0.165	0.189	-0.0354	-0.0703	-0.00391	0.00542	-0.0606	0.489	-0.237
8681	P36222	F7E1U6	tr|F7E1U6|F7E1U6_MACMU	CHI3L1	0.272	0.982	0.362	-0.61	0.962	0	-0.55	-0.767	-0.329	0.138	0.233	0.779	0.336	-0.309	0.139	-0.0166	-0.356	-0.187	-0.653
15702	P36405	F6SS85	tr|F6SS85|F6SS85_MACMU	ARL3	-0.275	0.238	0.198	0.42	-0.0226	0.0313	0	0.0893	0.0508	0.0952	0.102	-0.356	-0.0477	-0.486	0.189	-0.113	-0.343	-0.524	-0.265
7245	P36551	F7GNW9	tr|F7GNW9|F7GNW9_MACMU	CPOX	NA	NA	NA	NA	NA	NA	NA	NA	0.347	-0.00344	-1.2	0.0988	-0.39	0	0.0313	NA	NA	NA	NA
5892	P36896	F7HNS7	tr|F7HNS7|F7HNS7_MACMU	ACVR1B	0.00429	-0.00429	0.00462	-0.167	-0.0653	0.00574	0.134	0.331	NA	NA	NA	NA	NA	NA	NA	-0.277	0.295	-0.199	-0.391
4502	P36915	Q5TM59	sp|Q5TM59|GNL1_MACMU	GNL1	NA	NA	NA	NA	NA	NA	NA	NA	0.235	0.263	-0.291	-0.261	0	0.0698	0.489	-0.235	0.222	-0.328	-0.344
7499	P36957	F6YNF6	tr|F6YNF6|F6YNF6_MACMU	DLST	0.385	0.24	0.03	0.227	0.081	-0.186	-0.418	-0.479	-0.213	-0.232	0.0135	-0.0164	0.035	0	-0.458	0.346	-0.00121	0.298	-0.575
13411	P36980	F7AII4	tr|F7AII4|F7AII4_MACMU	CFHR2	-0.412	-0.624	0.0902	-0.368	0	0.0695	0.346	0.558	0.0825	0.379	-0.53	-0.268	0.0844	-0.282	0.669	0.0137	-0.0687	-0.668	-0.0937
13536	P37802	F6RKI4	tr|F6RKI4|F6RKI4_MACMU	TAGLN2	-0.0334	0.195	0.0521	0.483	0.0201	0.161	0.16	0.287	-0.00165	0	-0.0249	-0.215	0.3	-4.69e-05	0.184	-0.297	-0.547	-0.471	-0.127
11132	P37837	F7CBD5	tr|F7CBD5|F7CBD5_MACMU	TALDO1	-0.00157	0.346	0.354	0.497	0.377	-0.0937	-0.0105	0.874	-0.0778	0.62	0.587	-0.129	-0.121	0	0.317	-0.217	-0.0883	0.0416	-0.316
15106	P37840	P61143	sp|P61143|SYUA_MACMU	SNCA	0.639	0.807	0.596	0.338	0.48	-0.358	-0.209	-0.155	-0.465	-0.205	0.0118	0.731	0.357	0.298	-0.0131	-0.354	-0.0753	0	-0.409
12902	P38117	F6XJ63	tr|F6XJ63|F6XJ63_MACMU	ETFB	NA	NA	NA	NA	NA	NA	NA	NA	0.181	-0.219	-0.0813	0	-0.0737	-0.367	0.307	0.545	0.211	0.383	-0.413
5449	P38432	F7H5Z2	tr|F7H5Z2|F7H5Z2_MACMU	COIL	NA	NA	NA	NA	NA	NA	NA	NA	NA	NA	NA	NA	NA	NA	NA	-0.729	0.408	-0.408	0.633
8101	P38571	F7EC56	tr|F7EC56|F7EC56_MACMU	LIPA	0.214	-0.00224	0.374	-0.00965	-0.0153	-0.147	0.00224	-0.177	NA	NA	NA	NA	NA	NA	NA	0.231	0.253	-0.11	0.296
4525	P38606	F7HT50	tr|F7HT50|F7HT50_MACMU	ATP6V1A	0.0532	-0.154	0.268	0.304	-0.153	0	0.16	0.312	-1.67	0.389	-0.315	-0.295	0.264	0.185	0.699	-0.336	-0.219	-0.603	-0.204
3983	P38646	F6TLV2	tr|F6TLV2|F6TLV2_MACMU	HSPA9	0.567	0.671	0.336	0	0.462	-0.00362	0.00926	-0.415	-0.0463	0.102	0.0731	-0.0232	0.246	-0.0205	-0.0135	0.142	-0.00511	-0.354	-0.423
8253	P38919	F7AD80	tr|F7AD80|F7AD80_MACMU	EIF4A3	0.506	0.775	0.228	0.924	-0.0831	0	0.0548	-0.493	-0.195	0.284	0.128	-0.712	0.123	0.147	-0.00145	-0.202	-0.286	-0.617	-0.453
755	P39059	F6PPA4	tr|F6PPA4|F6PPA4_MACMU	COL15A1	-0.485	-0.539	-0.427	-0.178	-0.197	0.00732	0.0718	0.386	-0.147	0.204	-0.0516	-0.58	0.031	-0.0413	0.235	0.0631	0.439	0	0.254
12835	P39687	F7GIM0	tr|F7GIM0|F7GIM0_MACMU	ANP32A	0.218	1.11	0.703	-0.23	0.721	0.414	0.573	0.41	-0.163	0.341	-0.0258	-0.0681	-0.198	0.625	0	-0.216	-0.44	-0.495	-0.301
9631	P40121	F7HQ21	tr|F7HQ21|F7HQ21_MACMU	CAPG	-0.0319	-0.01	0	0.128	0.293	0.352	0.368	0.883	0.264	0.467	-0.0424	0.162	-0.269	-0.0384	0.29	-0.314	-0.561	-0.207	-0.167
2026	P40189	F7FXC5	tr|F7FXC5|F7FXC5_MACMU	IL6ST	-0.104	-0.206	-0.193	-0.155	0	-0.364	0.0372	-0.173	0.156	-0.176	-0.183	0.0293	-0.383	0.188	0.0405	0.111	0.279	0.127	0.19
6399	P40227	F7DV12	tr|F7DV12|F7DV12_MACMU	CCT6A	NA	NA	NA	NA	NA	NA	NA	NA	NA	NA	NA	NA	NA	NA	NA	0.756	0.0366	-0.0366	-0.254
11538	P40925	F7HSV9	tr|F7HSV9|F7HSV9_MACMU	MDH1	0.655	0.421	0.151	1	0.714	-0.318	-0.337	-0.635	-0.22	0	0.998	-0.048	-0.049	0.0199	0.194	0.124	-0.035	-0.463	-0.279
10737	P40926	F6YCN0	tr|F6YCN0|F6YCN0_MACMU	MDH2	0.183	-0.151	0	0.961	0.187	0.0791	-0.309	-0.42	-0.307	0.0467	0.466	0.0983	-0.074	-0.407	0.0888	0.616	-0.168	-0.0191	-0.675
3252	P40939	F7FRK6	tr|F7FRK6|F7FRK6_MACMU	HADHA	NA	NA	NA	NA	NA	NA	NA	NA	0.776	0.297	0.088	0.242	-0.316	-0.253	-0.00815	0.299	-0.00193	-0.0205	0
9114	P41143	F7HEV7	tr|F7HEV7|F7HEV7_MACMU	OPRD1	NA	NA	NA	NA	NA	NA	NA	NA	-0.117	0.11	0	-0.533	0.292	-0.0762	0.197	NA	NA	NA	NA
14465	P41208	F7HT47	tr|F7HT47|F7HT47_MACMU	CETN2	NA	NA	NA	NA	NA	NA	NA	NA	-0.535	0.00809	0.437	0.232	-0.0152	-0.189	0.574	-0.2	0.166	-0.369	0
7037	P41212	F7CM21	tr|F7CM21|F7CM21_MACMU	ETV6	NA	NA	NA	NA	NA	NA	NA	NA	-0.211	1.41	0	0.344	-0.455	-0.164	0.194	NA	NA	NA	NA
7281	P41219	F7DX99	tr|F7DX99|F7DX99_MACMU	PRPH	0.878	0.955	-0.0842	0.279	0	-0.417	1.01	-0.00902	0.936	1.28	-0.0813	-0.264	0.89	1.35	-0.141	0.632	-0.409	-0.26	-0.276
14322	P41222	F7EEW0	tr|F7EEW0|F7EEW0_MACMU	PTGDS	0.35	-0.0768	-0.252	-0.02	-0.324	0	0.00363	-0.0675	0.464	-0.0214	0.0844	-0.448	-2.03e-05	0.336	-0.0691	0.384	0.273	0.727	0.11
7053	P41240	F7GRP2	tr|F7GRP2|F7GRP2_MACMU	CSK	NA	NA	NA	NA	NA	NA	NA	NA	NA	NA	NA	NA	NA	NA	NA	-0.508	0.508	-0.802	1.17
5392	P41250	F6RC53	tr|F6RC53|F6RC53_MACMU	GARS	-0.0471	0.171	0.138	0.376	0.162	-0.097	0.395	0.197	-0.0328	-0.0701	0.736	-0.265	0.188	0	0.0692	-0.145	-0.36	-0.0933	-0.0987
935	P41252	F6PZ57	tr|F6PZ57|F6PZ57_MACMU	IARS	-0.467	-0.0264	-0.227	0.143	0.593	1.47	-0.0629	0.144	0.858	0.671	-0.373	0.418	-0.384	-0.09	0.437	-0.265	0	-0.17	0.955
13829	P41271	F7FSH9	tr|F7FSH9|F7FSH9_MACMU	MINOS1-NBL1	0.119	0.057	-0.156	-0.196	-0.129	-0.674	0.168	-0.21	0.0808	-0.238	-0.313	0.137	-0.243	0.193	-0.511	0.0963	0	0.198	0.189
13010	P41273	F6VA70	tr|F6VA70|F6VA70_MACMU	TNFSF9	0.145	0.582	-0.468	-0.573	0.712	0.232	0	-0.116	-0.147	0.173	-0.147	-0.618	-0.501	-0.424	-0.213	0.167	0.0389	0.423	0.209
7361	P41586	F7GM34	tr|F7GM34|F7GM34_MACMU	ADCYAP1R1	0.525	0.0506	-0.182	-0.445	-0.169	0	0.352	0.0595	-0.0902	-0.308	-0.202	-0.0476	0.418	0.454	-0.247	0.286	0.281	0.508	-0.189
12288	P41732	F7F825	tr|F7F825|F7F825_MACMU	TSPAN7	-0.679	0.593	-0.159	0.119	-0.335	0.306	-0.119	0.198	NA	NA	NA	NA	NA	NA	NA	NA	NA	NA	NA
12867	P42126	F6QGV0	tr|F6QGV0|F6QGV0_MACMU	ECI1	0.317	0.184	-0.0558	0.0272	0.0495	-0.291	-0.0388	-0.117	0.0831	0.0989	-0.181	0.402	0	-0.673	-0.561	0.16	0.0848	-0.363	-0.903
15318	P42127	A1YL67	sp|A1YL67|ASIP_MACMU	ASIP	NA	NA	NA	NA	NA	NA	NA	NA	0.513	-0.915	-0.937	0	0.126	0.241	-1.09	NA	NA	NA	NA
1556	P42285	F7D9W7	tr|F7D9W7|F7D9W7_MACMU	SKIV2L2	NA	NA	NA	NA	NA	NA	NA	NA	NA	NA	NA	NA	NA	NA	NA	0.57	-0.000164	-0.177	0.000164
1331	P42336	F7CTS2	tr|F7CTS2|F7CTS2_MACMU	PIK3CA	NA	NA	NA	NA	NA	NA	NA	NA	NA	NA	NA	NA	NA	NA	NA	0.262	-0.412	0.172	-0.172
2367	P42658	F7HGN6	tr|F7HGN6|F7HGN6_MACMU	DPP6	0.197	-0.0433	-0.0752	0	0.155	-0.139	-0.101	-0.26	0.00856	-0.29	0.0658	-0.000951	0.0341	0.214	-0.185	-0.0653	0.183	0.431	0.0178
8679	P42765	F6VM61	tr|F6VM61|F6VM61_MACMU	ACAA2	NA	NA	NA	NA	NA	NA	NA	NA	-0.331	-0.442	-0.0207	0.259	0.071	-0.455	-0.413	0.849	0.211	0.807	0
6105	P42785	F7CD15	tr|F7CD15|F7CD15_MACMU	PRCP	-0.0251	-0.212	0.466	-0.0192	-0.0713	0.405	-0.194	0.2	0.207	0.348	0.263	-0.0628	0.088	-0.00197	0	0.211	0.638	-0.0963	-0.0933
14047	P42857	F6WLM4	tr|F6WLM4|F6WLM4_MACMU	NSG1	-0.121	-0.381	-0.275	0	0.111	0.152	-0.0565	-0.11	-0.159	0.208	-0.0525	-0.112	0.0464	0.442	-0.079	0.481	0.199	0.854	0.0716
2962	P42892	F7GIX6	tr|F7GIX6|F7GIX6_MACMU	ECE1	NA	NA	NA	NA	NA	NA	NA	NA	0.359	0.896	0.247	-0.662	-0.0535	-0.0545	-0.374	0	0.225	-0.00878	0.155
5845	P43003	F7HNP4	tr|F7HNP4|F7HNP4_MACMU	SLC1A3	NA	NA	NA	NA	NA	NA	NA	NA	NA	NA	NA	NA	NA	NA	NA	-0.744	0.0931	0.429	-0.0931
5256	P43004	F6ZDV3	tr|F6ZDV3|F6ZDV3_MACMU	SLC1A2	0.33	0.541	0.0817	0.156	-0.0509	-0.0154	-0.286	-0.373	-0.485	0	-0.127	0.355	0.143	-0.242	0.0214	-0.121	0.0529	-0.0285	0.198
7830	P43034	F7AE78	tr|F7AE78|F7AE78_MACMU	PAFAH1B1	0.185	0	-0.0107	0.334	0.0699	0.193	0.0983	0.123	0.305	0.207	0.218	-0.116	-0.0104	-0.165	-0.148	-0.0146	-0.175	-0.103	-0.312
4603	P43121	F6SM35	tr|F6SM35|F6SM35_MACMU	MCAM	-0.0973	-0.254	-0.224	-0.287	-0.0296	-0.0458	0.15	0	0.0416	0.053	-0.224	-0.00255	-0.199	0.121	0.122	0.222	0.184	0.726	0.166
709	P43146	F6RRI0	tr|F6RRI0|F6RRI0_MACMU	DCC	-0.0679	0.11	-0.171	0	0.216	-0.0976	-0.0697	-0.198	0.0867	-0.161	-0.107	0.00462	0.419	0.164	-0.0409	-0.247	0.194	0.489	0.231
4489	P43155	F7HQL4	tr|F7HQL4|F7HQL4_MACMU	CRAT	NA	NA	NA	NA	NA	NA	NA	NA	0	-0.539	0.437	0.173	0.269	-0.524	-0.0132	0.975	-0.0767	0.00317	-0.374
10444	P43234	F6RB51	tr|F6RB51|F6RB51_MACMU	CTSO	0.0848	-0.195	0	-0.183	0.0248	-0.119	-0.228	-0.516	0.265	-0.169	-0.118	-0.416	0.049	0.173	-0.0516	0.246	0.487	0.021	0.1
9871	P43235	P61277	sp|P61277|CATK_MACMU	CTSK	0.0833	0.0623	0.0725	-0.000157	0.0361	-0.212	0	-0.253	0.325	-0.107	-0.0508	0.0675	-0.0251	0.269	-0.362	NA	NA	NA	NA
7306	P43251	F7HEG8	tr|F7HEG8|F7HEG8_MACMU	BTD	-0.0311	-0.0491	-0.0682	-0.0701	0.0593	-0.114	0.158	0.135	0.329	-0.146	-0.12	-0.0473	0.0322	0	-0.0543	0.225	0.301	0.134	0.124
10448	P43366	F7EIH7	tr|F7EIH7|F7EIH7_MACMU	MAGEB1	NA	NA	NA	NA	NA	NA	NA	NA	0.236	-0.0571	0.167	0	-0.4	-0.000935	0.025	NA	NA	NA	NA
5315	P43378	F7GVM8	tr|F7GVM8|F7GVM8_MACMU	PTPN9	-0.563	0.214	-0.0229	-0.398	0.0706	-0.0791	0.0229	0.103	NA	NA	NA	NA	NA	NA	NA	NA	NA	NA	NA
4442	P43403	F7FAI7	tr|F7FAI7|F7FAI7_MACMU	ZAP70	0.338	0.368	-0.0608	-0.454	-0.29	0	-0.109	-0.0399	0.0634	-0.268	-0.0508	0.00585	-0.347	-0.0434	0.086	1.13	1.13	0.705	0.74
13596	P43487	F7GMJ1	tr|F7GMJ1|F7GMJ1_MACMU	RANBP1	NA	NA	NA	NA	NA	NA	NA	NA	-0.168	-0.433	0.684	0	0.4	0.652	-0.303	NA	NA	NA	NA
7070	P43490	F7ESY5	tr|F7ESY5|F7ESY5_MACMU	NAMPT	NA	NA	NA	NA	NA	NA	NA	NA	-0.235	0.0269	0.116	0.0399	0	-0.284	0.431	0.0861	-0.36	-0.4	-0.0866
7409	P43652	F7HAH7	tr|F7HAH7|F7HAH7_MACMU	AFM	-0.594	0.147	0.152	-0.233	0	-0.327	0.477	0.446	0.135	0.0893	-0.0661	0.0391	-0.292	-0.43	0.485	-0.443	0.159	-0.602	-0.17
8150	P43686	F7HIL8	tr|F7HIL8|F7HIL8_MACMU	PSMC4	0.264	0.845	-0.108	1.26	-0.0477	0.338	-0.165	-1.83	0.074	-0.499	-0.0801	-0.18	0.184	0.033	0.339	0	0.285	-0.12	-0.0331
10516	P45381	F7DR53	tr|F7DR53|F7DR53_MACMU	ASPA	NA	NA	NA	NA	NA	NA	NA	NA	NA	NA	NA	NA	NA	NA	NA	0.228	-0.228	0.327	-0.285
6334	P45452	F6YQ28	tr|F6YQ28|F6YQ28_MACMU	MMP13	NA	NA	NA	NA	NA	NA	NA	NA	NA	NA	NA	NA	NA	NA	NA	0.0391	0.662	-0.375	-0.0391
13327	P45877	F7BC33	tr|F7BC33|F7BC33_MACMU	PPIC	0.16	-0.0456	0.0128	-0.0953	-0.00337	-0.221	0	-0.221	0.181	0.066	-0.196	0.0964	0.335	0.354	-0.33	-0.169	0.476	-0.401	0.00705
2313	P45974	F7CT78	tr|F7CT78|F7CT78_MACMU	USP5	0.378	0.303	0.0189	0.729	-0.28	0	-0.447	-0.43	-0.58	0.318	0.209	-0.632	0.368	0.128	-0.0484	-0.0154	0.35	-0.0617	-0.284
990	P46019	F7B2V1	tr|F7B2V1|F7B2V1_MACMU	PHKA2	NA	NA	NA	NA	NA	NA	NA	NA	NA	NA	NA	NA	NA	NA	NA	0.0596	-0.24	0.759	-0.0596
10569	P46109	F6VK11	tr|F6VK11|F6VK11_MACMU	CRKL	0.108	0.222	0.0144	0.394	0	-0.197	0.228	-0.164	0.0754	0.255	-0.0353	0.533	-0.122	-0.408	-0.0854	0.074	-0.344	-0.343	-0.0938
3355	P46459	F6YT14	tr|F6YT14|F6YT14_MACMU	NSF	0.731	0.449	0.00783	0.728	0.571	0.471	-0.575	-0.59	-0.0316	0.752	0.567	-0.0165	0	-0.0972	0.0924	-0.0581	-0.146	-0.0972	-0.212
13569	P46527	F6Z4R0	tr|F6Z4R0|F6Z4R0_MACMU	CDKN1B	NA	NA	NA	NA	NA	NA	NA	NA	NA	NA	NA	NA	NA	NA	NA	0.437	-0.114	-0.563	0.114
114	P46531	F7HQZ9	tr|F7HQZ9|F7HQZ9_MACMU	NOTCH1	NA	NA	NA	NA	NA	NA	NA	NA	0.0419	0.192	-0.44	0.0733	-0.104	-0.167	0.179	0	-0.0612	0.263	-0.121
13840	P46781	F6Y9H7	tr|F6Y9H7|F6Y9H7_MACMU	RPS9	NA	NA	NA	NA	NA	NA	NA	NA	NA	NA	NA	NA	NA	NA	NA	0.153	-0.714	-0.153	0.247
13599	P46782	F7HNZ0	tr|F7HNZ0|F7HNZ0_MACMU	RPS5	0.432	0.438	0.165	0.437	0.134	0.0449	-0.0482	-0.108	0	-0.301	-0.243	-0.437	0.242	0.317	-0.401	0.185	-0.803	-0.57	-0.6
154	P46821	F7F0Z0	tr|F7F0Z0|F7F0Z0_MACMU	MAP1B	0.412	0.585	0.122	0.126	0.135	-0.444	-0.174	-0.608	-0.615	-0.204	0.578	0.299	0.15	0.0744	0	-0.294	-0.253	-0.226	-0.327
11170	P46926	F6ZHX4	tr|F6ZHX4|F6ZHX4_MACMU	GNPDA1	-0.0117	-0.0352	0.218	0.469	0.194	-0.149	0	0.395	-0.448	0.174	0.235	-0.42	-0.165	0.0403	-0.188	NA	NA	NA	NA
55	P46939	F6R0R2	tr|F6R0R2|F6R0R2_MACMU	UTRN	NA	NA	NA	NA	NA	NA	NA	NA	0.0651	0.311	-0.332	0	-0.159	-0.554	0.165	NA	NA	NA	NA
527	P46940	F7H0Q8	tr|F7H0Q8|F7H0Q8_MACMU	IQGAP1	-0.244	-0.149	0	0.0882	0.0951	0.216	0.122	0.551	0.0701	0.237	-0.0753	-0.224	-0.0597	-0.124	0.233	-0.183	-0.28	-0.196	0.313
11288	P47755	F7H1J4	tr|F7H1J4|F7H1J4_MACMU	CAPZA2	0.0676	0.383	0.238	0.761	0.17	0.0283	-0.284	0.408	0	0.323	0.414	-0.124	-0.0786	-0.0533	-0.0579	-0.212	-0.332	-0.463	-0.313
14928	P47813	F7HJF7	tr|F7HJF7|F7HJF7_MACMU	EIF1AX	NA	NA	NA	NA	NA	NA	NA	NA	-0.174	-0.0395	0.32	0.0187	0.148	0.16	0.113	0	-0.286	-0.455	-0.294
2924	P47897	F7GZY5	tr|F7GZY5|F7GZY5_MACMU	QARS	NA	NA	NA	NA	NA	NA	NA	NA	-0.354	-0.287	0.297	-0.685	0.207	0.342	0.161	0	-0.486	0.0712	-0.68
7742	P47972	F7H281	tr|F7H281|F7H281_MACMU	NPTX2	-0.159	0.145	-0.0447	0.00157	-0.186	0	0.0559	0.219	-0.0368	-0.156	-0.0571	0.12	-0.283	0.433	-0.0642	-0.336	0.135	0.245	0.2
9326	P48059	F7HRP5	tr|F7HRP5|F7HRP5_MACMU	LIMS1	-0.266	0.145	-0.286	0.236	0.105	0.527	0.299	-0.173	0.521	-0.474	-0.918	0	0.824	-0.2	0.718	-0.368	-1.02	-0.542	0.581
15932	P48061	F7E098	tr|F7E098|F7E098_MACMU	CXCL12	NA	NA	NA	NA	NA	NA	NA	NA	NA	NA	NA	NA	NA	NA	NA	-0.654	1.81	-0.933	0.654
3245	P48147	F6ZLE6	tr|F6ZLE6|F6ZLE6_MACMU	PREP	0.121	0.534	0.0936	0.695	0.108	-0.156	-0.187	-0.0766	-0.299	0.244	0.484	-0.185	0.0556	0.161	-0.0692	-0.159	-0.223	0	-0.101
5669	P48163	F7FDW2	tr|F7FDW2|F7FDW2_MACMU	ME1	0.106	0.205	0.283	0.342	0.1	-0.277	-0.233	-0.445	-0.348	0	0.401	-0.206	0.0719	-0.171	0.0465	0.335	-0.285	-0.18	-0.504
1901	P48200	F7E7R2	tr|F7E7R2|F7E7R2_MACMU	IREB2	NA	NA	NA	NA	NA	NA	NA	NA	0.706	0.141	0	1.21	-0.102	-0.157	-0.271	NA	NA	NA	NA
14422	P48304	F7HHX1	tr|F7HHX1|F7HHX1_MACMU	REG1B	-0.386	0.266	0.373	-0.12	0.3	0.363	0.392	0.519	0	-0.112	0.0233	2.27	-0.256	-0.114	-0.578	-0.173	0.0092	-0.0718	-0.0739
1180	P48357	Q9MYL0	sp|Q9MYL0|LEPR_MACMU	LEPR	0.0802	0.0315	-0.087	-0.177	0.293	0.125	-0.0315	-0.232	NA	NA	NA	NA	NA	NA	NA	0.228	-0.301	-0.524	0.247
6135	P48444	F7GX08	tr|F7GX08|F7GX08_MACMU	ARCN1	0.288	0.706	0.203	0.627	0.0673	0.0907	-0.406	-0.0243	0.044	0.147	0	-0.312	-0.133	-0.218	0.000302	-0.175	-0.593	-0.836	-0.492
4087	P48506	F7EZ43	tr|F7EZ43|F7EZ43_MACMU	GCLC	-0.0753	0	0.0735	0.258	0.15	-0.235	0.304	0.323	0.161	0.151	0.000844	-0.00738	-0.00401	-0.132	0.323	-0.49	-0.0105	-0.622	-0.251
11857	P48507	F6RLS0	tr|F6RLS0|F6RLS0_MACMU	GCLM	NA	NA	NA	NA	NA	NA	NA	NA	0	0.0379	-0.132	-0.632	0.112	0.398	0.17	-0.855	0.293	-0.931	-0.273
6632	P48551	F6ZFH2	tr|F6ZFH2|F6ZFH2_MACMU	IFNAR2	-0.134	0.00677	0.134	0.732	-0.235	-0.0356	0.0092	-0.477	-0.0454	-0.035	0.0673	0.199	0.0479	0.21	-0.117	0	-0.0245	0.484	-0.0806
8932	P48595	F6TWT7	tr|F6TWT7|F6TWT7_MACMU	SERPINB10	-0.323	-0.274	0.678	-0.0112	0.806	0.501	0.227	1.6	0.65	0.0792	0	-0.0572	-0.172	0.226	0.206	-0.14	-0.172	-0.0891	-0.389
7663	P48637	F7EMC7	tr|F7EMC7|F7EMC7_MACMU	GSS	0.403	-0.0972	0.154	0.54	0.322	-0.0735	-0.0761	-0.441	-0.289	0	0.276	-0.125	0.153	0.0354	0.0267	-0.158	-0.237	0.0976	-0.349
5734	P48643	F7GKC2	tr|F7GKC2|F7GKC2_MACMU	CCT5	NA	NA	NA	NA	NA	NA	NA	NA	-0.0551	0	0.197	-0.284	0.198	0.0937	0.224	0.000329	-0.227	-0.0931	-0.071
7110	P48723	F7GMR0	tr|F7GMR0|F7GMR0_MACMU	HSPA13	-0.217	-0.17	-0.0753	-0.268	-0.161	0.152	0.193	0.173	-0.0952	-0.162	0.0196	-0.306	0.0962	-0.0556	0	0.423	0.222	0.206	0.164
6973	P48735	F6VPY2	tr|F6VPY2|F6VPY2_MACMU	IDH2	0.101	-0.0158	0.353	0.517	-0.0154	0.993	-0.175	-0.229	-0.167	-0.202	0.229	0.096	0.277	-0.267	0.177	0.388	-0.0843	0	-0.28
11515	P48739	F7G7C4	tr|F7G7C4|F7G7C4_MACMU	PITPNB	-0.0778	0.161	-0.146	0.256	0.0837	0.234	0	-0.145	-0.608	0.141	-0.213	-0.365	0.853	0.00818	-0.27	0.388	-0.0256	0.397	-0.502
5727	P48740	F7HR39	tr|F7HR39|F7HR39_MACMU	MASP1	-0.15	-0.0839	-0.0565	-0.0176	-0.169	0.0287	0.539	0.319	0.23	0.484	-0.106	0	-0.0624	-0.0193	0.647	0.0898	0.341	-0.00627	0.327
8750	P48745	F6WCM6	tr|F6WCM6|F6WCM6_MACMU	NOV	-0.076	0.109	-0.21	-0.153	0.167	-0.0991	0.0302	-0.0465	-0.173	-0.227	0.157	0.139	0	0.384	-0.345	0.0127	0.118	0.735	-0.108
2945	P48960	F6TY46	tr|F6TY46|F6TY46_MACMU	ADGRE5	0.0144	0.1	0.133	-0.154	-0.0469	0	-0.032	-0.0843	0.197	-0.0656	-0.211	0.241	-0.181	-0.249	0.294	-0.436	0.169	0.272	0.068
13789	P49006	F6RIS3	tr|F6RIS3|F6RIS3_MACMU	MARCKSL1	-0.096	0.245	0.402	-0.177	0.26	-0.448	0.847	1.06	0.587	-0.452	0	0.317	-0.101	0.206	-0.691	-0.155	-0.225	-0.15	0.546
7914	P49189	F7DDW6	tr|F7DDW6|F7DDW6_MACMU	ALDH9A1	0.297	0.639	0.141	1.23	-0.266	0.157	-0.318	0.346	-0.378	0.515	0.209	-0.542	-0.0053	-0.208	0.357	0	-0.437	-0.517	-0.101
10595	P49247	F7H8C8	tr|F7H8C8|F7H8C8_MACMU	RPIA	-0.494	-0.582	-0.091	0	0.294	0.0354	0.382	1.58	0.274	1.06	-0.631	-0.222	-0.407	0.313	0.656	-0.3	0.424	-0.178	-0.332
6142	P49257	F6SS58	tr|F6SS58|F6SS58_MACMU	LMAN1	-0.337	-0.197	-0.144	-0.0579	-0.199	0.086	-0.265	0.0674	0.113	-0.042	-0.321	0	0.369	0.739	-0.315	0.00778	0.0144	0.166	0.0693
168	P49327	F6PYE7	tr|F6PYE7|F6PYE7_MACMU	FASN	0.0974	0.252	-0.236	0.679	-0.442	0.491	0	0.148	-0.0765	0.342	-0.0556	-0.0591	0.211	-0.196	0.19	0.539	-0.202	-0.0368	-0.444
12804	P49354	F7H0T9	tr|F7H0T9|F7H0T9_MACMU	FNTA	-0.0343	0.176	0.142	0.158	0.0783	-0.285	0.205	0.0343	NA	NA	NA	NA	NA	NA	NA	-0.349	-0.0695	-0.433	-0.0941
5730	P49368	F6W9W1	tr|F6W9W1|F6W9W1_MACMU	CCT3	NA	NA	NA	NA	NA	NA	NA	NA	-0.0758	-0.234	0.0663	0.123	0.135	0.182	0.0572	-0.00801	-0.0428	-0.257	0
7403	P49411	F7ELD6	tr|F7ELD6|F7ELD6_MACMU	TUFM	NA	NA	NA	NA	NA	NA	NA	NA	NA	NA	NA	NA	NA	NA	NA	0.514	-0.0147	0.0147	-0.0832
8671	P49441	H9H374	tr|H9H374|H9H374_MACMU	INPP1	0.409	0.754	0.0682	0	0.0509	0.00426	-0.282	-0.0637	-0.485	-0.125	0.132	0.125	-0.151	0.245	0.0244	-0.049	-0.449	-0.49	-0.568
16014	P49458	F7G5Y8	tr|F7G5Y8|F7G5Y8_MACMU	SRP9	NA	NA	NA	NA	NA	NA	NA	NA	NA	NA	NA	NA	NA	NA	NA	0.0658	-0.232	0.295	-0.0658
2106	P49588	F7F9L6	tr|F7F9L6|F7F9L6_MACMU	AARS	NA	NA	NA	NA	NA	NA	NA	NA	-0.251	0.0764	-0.286	-0.0815	0.0172	0	0.365	0.255	-0.299	0.23	-0.235
6397	P49590	F7GID8	tr|F7GID8|F7GID8_MACMU	HARS2	NA	NA	NA	NA	NA	NA	NA	NA	-0.489	0.331	-0.099	-0.748	0.0837	0.0342	0	NA	NA	NA	NA
7977	P49591	F7EIJ6	tr|F7EIJ6|F7EIJ6_MACMU	SARS	NA	NA	NA	NA	NA	NA	NA	NA	0	0.087	0.106	1.05	0.763	-0.0976	0.396	-0.109	-0.109	-0.312	-0.0997
7641	P49593	F7GFC1	tr|F7GFC1|F7GFC1_MACMU	PPM1F	NA	NA	NA	NA	NA	NA	NA	NA	NA	NA	NA	NA	NA	NA	NA	-0.814	0.0185	-0.0185	0.171
1481	P49641	H9H5G2	tr|H9H5G2|H9H5G2_MACMU	MAN2A2	-0.274	-0.215	-0.06	-0.432	-0.161	0.216	-0.0228	-0.0856	-0.111	-0.178	0.12	0	0.0169	0.16	0.00664	0.243	0.0136	1.15	0.205
13488	P49720	F7EIY0	tr|F7EIY0|F7EIY0_MACMU	PSMB3	-0.132	-0.119	0.0515	0.0468	0.0524	0.239	0.144	0.0359	0.008	0.248	0	-0.177	-0.341	-0.0281	0.0223	-0.16	-0.091	-0.227	-0.243
13604	P49721	F6XJL9	tr|F6XJL9|F6XJL9_MACMU	PSMB2	NA	NA	NA	NA	NA	NA	NA	NA	0.301	0	0.000993	0.149	-0.21	-0.589	0.0919	-0.224	-0.155	-0.368	0.00957
1628	P49746	F6ZVD5	tr|F6ZVD5|F6ZVD5_MACMU	THBS3	0.112	-0.234	0.42	-0.153	-0.214	0.062	0.152	-0.147	0.151	-0.0276	0.434	-0.0553	0	0.132	0.17	-0.16	0.345	-0.0806	-0.377
2819	P49747	F7H6X3	tr|F7H6X3|F7H6X3_MACMU	COMP	0.0797	-0.243	0.029	0.184	0.0976	0.252	-0.331	-0.307	-0.00294	-0.246	-0.508	0	-0.611	-0.0706	-0.156	0.506	0.559	0.0438	0.882
5257	P49748	F7D0Y3	tr|F7D0Y3|F7D0Y3_MACMU	ACADVL	NA	NA	NA	NA	NA	NA	NA	NA	0.261	-0.849	0.0581	0.475	0.515	-0.079	-0.848	0.033	-0.26	0	-0.264
7223	P49753	F7F8Z9	tr|F7F8Z9|F7F8Z9_MACMU	ACOT2	-0.292	0	-0.0101	0.122	0.031	0.723	-0.0469	0.219	-0.0525	-0.0534	-0.232	0.0226	0.478	-0.179	0.561	0.723	-0.151	0.434	-0.456
2472	P49756	F7C691	tr|F7C691|F7C691_MACMU	RBM25	-0.0611	-0.39	-0.343	-0.187	0.121	0.261	0.00317	0.0379	0.571	0.022	-0.121	0.261	-0.394	-0.54	0.179	-0.501	0.23	-0.17	0
13358	P49763	F7HB10	tr|F7HB10|F7HB10_MACMU	PGF	NA	NA	NA	NA	NA	NA	NA	NA	0	-0.985	0.0744	-0.86	-0.57	-0.223	-0.558	0.0424	0.128	0.239	0.113
7571	P49767	B6EBK4	tr|B6EBK4|B6EBK4_MACMU	VEGFC	0.148	-0.0375	-0.0602	-0.507	-0.516	0.22	0.0375	0.235	NA	NA	NA	NA	NA	NA	NA	NA	NA	NA	NA
9791	P49770	F7HB02	tr|F7HB02|F7HB02_MACMU	EIF2B2	NA	NA	NA	NA	NA	NA	NA	NA	NA	NA	NA	NA	NA	NA	NA	-0.0481	0.498	-0.644	0.0481
15224	P49773	F6R248	tr|F6R248|F6R248_MACMU	HINT1	0.664	0.582	0.189	0.728	0.0215	-0.31	-0.275	-0.418	-0.658	0	0.547	-0.196	0.278	0.309	0.372	-0.567	-0.254	-0.242	-0.569
14576	P49788	F6VQP5	tr|F6VQP5|F6VQP5_MACMU	RARRES1	0.333	0.233	0.0905	-0.458	-0.166	-0.223	0.0389	-0.0816	0.448	0	0.325	-0.0178	-0.0104	-0.101	-0.319	0.288	0.254	0.372	-0.189
6451	P49840	F6VAQ6	tr|F6VAQ6|F6VAQ6_MACMU	GSK3A	NA	NA	NA	NA	NA	NA	NA	NA	0.0122	-0.229	-0.641	0	-0.475	0.0442	0.387	NA	NA	NA	NA
12811	P49862	H9H5Q0	tr|H9H5Q0|H9H5Q0_MACMU	KLK7	NA	NA	NA	NA	NA	NA	NA	NA	NA	NA	NA	NA	NA	NA	NA	0.769	0.346	-0.388	-0.346
12261	P49863	F6TIY3	tr|F6TIY3|F6TIY3_MACMU	GZMK	0.0242	0.102	0.0811	-0.191	-0.514	0.336	-0.309	-0.0242	NA	NA	NA	NA	NA	NA	NA	NA	NA	NA	NA
14843	P49913	Q9GLV5	sp|Q9GLV5|CAMP_MACMU	CAMP	0.299	-0.632	0.738	-0.487	-0.327	0.456	0.679	2.84	0.255	1.48	-0.191	-0.387	-0.41	-0.199	0.77	-0.222	0	-0.0337	0.612
3669	P49915	F7EE95	tr|F7EE95|F7EE95_MACMU	GMPS	NA	NA	NA	NA	NA	NA	NA	NA	-0.589	0.0394	-0.0388	-0.661	0.357	0.0439	0	NA	NA	NA	NA
11698	P50135	F7EYX9	tr|F7EYX9|F7EYX9_MACMU	HNMT	NA	NA	NA	NA	NA	NA	NA	NA	NA	NA	NA	NA	NA	NA	NA	0.29	0.0131	-0.0131	-0.265
9113	P50213	F7G702	tr|F7G702|F7G702_MACMU	IDH3A	NA	NA	NA	NA	NA	NA	NA	NA	-0.176	0	-0.0497	-0.0968	0.645	-0.123	0.525	0.571	0.15	0.177	-0.47
11181	P50225	F6X606	tr|F6X606|F6X606_MACMU	SULT1A1	NA	NA	NA	NA	NA	NA	NA	NA	NA	NA	NA	NA	NA	NA	NA	-0.0356	0.0356	-0.251	0.278
15931	P50238	F7DI11	tr|F7DI11|F7DI11_MACMU	CRIP1	0.55	0.347	0.0147	0.968	-0.316	0.33	-0.00655	-0.473	-0.178	-0.0552	-0.0624	0.0445	0.294	0	0.0782	0.418	-0.272	-0.478	-0.476
4641	P50281	F7GFT1	tr|F7GFT1|F7GFT1_MACMU	MMP14	-0.0529	-0.223	-0.195	-0.167	-0.0285	0.0844	0.46	0.205	-0.00783	0.207	-0.351	0.344	0.0428	0.315	0	-0.0954	0.0158	-0.0103	0.263
7316	P50395	F6XQP2	tr|F6XQP2|F6XQP2_MACMU	GDI2	0.0978	0.219	-0.00672	0.508	0	0.0541	-0.107	0.183	-0.223	0.155	0.283	-0.428	-0.156	0.147	0.00729	-0.223	-0.0754	-0.418	-0.285
8252	P50443	F6TNJ1	tr|F6TNJ1|F6TNJ1_MACMU	SLC26A2	NA	NA	NA	NA	NA	NA	NA	NA	0.103	-0.124	0.51	0.325	-0.468	-0.367	0	NA	NA	NA	NA
9477	P50453	F7HA35	tr|F7HA35|F7HA35_MACMU	SERPINB9	0.0692	0.334	-0.147	0.804	0.0335	-0.0264	-0.15	-0.249	0	0.0854	0.299	-0.223	0.183	0.163	-0.077	0.0117	-0.141	-0.189	-0.119
8232	P50454	F7D5P2	tr|F7D5P2|F7D5P2_MACMU	SERPINH1	0.22	-0.00459	0.00459	-0.533	0.173	0.218	0.111	-0.0972	NA	NA	NA	NA	NA	NA	NA	-0.0102	-0.329	-0.0473	0.0545
13363	P50461	F6T7Q2	tr|F6T7Q2|F6T7Q2_MACMU	CSRP3	NA	NA	NA	NA	NA	NA	NA	NA	NA	NA	NA	NA	NA	NA	NA	0.011	-0.011	-0.75	2.19
9385	P50502	F6T7N7	tr|F6T7N7|F6T7N7_MACMU	ST13	0.426	0.775	0.341	0.459	0.237	-0.186	-0.0924	-0.294	-0.215	0.139	-0.0216	0.0237	0.24	0.3	0	-0.0577	-0.194	-0.184	-0.22
8792	P50552	F6U702	tr|F6U702|F6U702_MACMU	VASP	0.139	-0.681	0.276	-0.635	0	-0.571	0.873	0.77	0.0746	0.76	-0.497	-0.256	-0.444	0.54	0.48	-0.895	-0.373	-0.999	0.0688
6425	P50579	F6T632	tr|F6T632|F6T632_MACMU	METAP2	NA	NA	NA	NA	NA	NA	NA	NA	NA	NA	NA	NA	NA	NA	NA	1.36	0.0703	-0.0703	-0.387
217	P50748	F6T147	tr|F6T147|F6T147_MACMU	KNTC1	NA	NA	NA	NA	NA	NA	NA	NA	NA	NA	NA	NA	NA	NA	NA	-0.0332	-0.336	0.0332	0.088
6318	P50895	F7FKM5	tr|F7FKM5|F7FKM5_MACMU	BCAM	0.272	0.119	-0.0549	-0.216	-0.0749	0.144	-0.0652	-0.209	0.185	-0.0981	-0.115	0	-0.145	0.164	-0.112	0.267	0.289	0.481	0.258
10640	P50897	F7HMC7	tr|F7HMC7|F7HMC7_MACMU	PPT1	0.285	-0.0558	0	-0.222	-0.342	0.165	-0.132	0.0447	-0.218	-0.776	0.755	-0.735	0.748	0.0794	-0.732	0.432	0.155	0.178	-0.204
5657	P50990	F6VN84	tr|F6VN84|F6VN84_MACMU	CCT8	0.654	0.311	0.0498	0.592	-0.0218	0	-0.11	0.0417	-0.461	0.503	0.0026	-0.0963	-0.0828	0.219	-0.0391	0.0971	-0.236	-0.148	-0.319
6820	P50991	F7ENV5	tr|F7ENV5|F7ENV5_MACMU	CCT4	0.436	0.564	0	0.527	-0.0349	0.323	0.0674	-0.707	-0.0251	-0.308	-0.139	-0.0228	0.495	0.14	0.331	0.188	-0.466	-0.469	-0.231
1640	P50993	F7DR01	tr|F7DR01|F7DR01_MACMU	ATP1A2	0.161	0.251	-0.147	-0.3	0.0967	-0.301	0.522	0.468	-0.221	-0.136	0	-0.0551	-0.0306	-0.0247	-0.149	0.714	0.251	0.81	0.0856
13253	P51148	F7G108	tr|F7G108|F7G108_MACMU	RAB5C	NA	NA	NA	NA	NA	NA	NA	NA	NA	NA	NA	NA	NA	NA	NA	0.387	-0.109	-0.067	0.067
15305	P51161	F6UZ52	tr|F6UZ52|F6UZ52_MACMU	FABP6	-0.37	-0.146	0.0405	-0.328	0.0606	0.0837	0.286	0.163	0.417	-0.156	-0.369	0	0.351	-0.248	0.0713	-0.0957	0.149	-0.484	-0.37
14052	P51452	F7C5I2	tr|F7C5I2|F7C5I2_MACMU	DUSP3	-0.795	-0.246	-0.132	1.01	0	0.78	-0.273	0.243	-0.422	0.166	0.298	-0.193	0.293	-0.193	0.514	-0.049	-0.124	0.0539	0.315
14414	P51571	F7E8B0	tr|F7E8B0|F7E8B0_MACMU	SSR4	-0.0279	0.0542	-0.278	-0.0196	-0.211	0.0879	0.288	0.31	NA	NA	NA	NA	NA	NA	NA	0.0262	0.0196	-0.137	-0.16
3551	P51659	F6UA48	tr|F6UA48|F6UA48_MACMU	HSD17B4	NA	NA	NA	NA	NA	NA	NA	NA	NA	NA	NA	NA	NA	NA	NA	0.159	-0.112	-0.677	0.112
10469	P51665	F6TS39	tr|F6TS39|F6TS39_MACMU	PSMD7	NA	NA	NA	NA	NA	NA	NA	NA	NA	NA	NA	NA	NA	NA	NA	0.421	-0.377	0.248	-0.248
6136	P51688	F7HHZ9	tr|F7HHZ9|F7HHZ9_MACMU	SGSH	-0.135	-0.0596	-0.143	0.0622	-0.361	-0.308	0.204	0.158	0.627	0.418	-0.00284	0	-0.211	-0.181	-0.321	0.172	0.168	0.344	0.134
4238	P51693	F7ARH2	tr|F7ARH2|F7ARH2_MACMU	APLP1	0.434	-0.0293	-0.122	-0.22	-0.174	0.144	-0.118	-0.221	0.105	-0.24	-0.0231	0	0.277	0.224	-0.279	0.35	0.399	0.709	0.0396
5099	P51854	F7GFJ4	tr|F7GFJ4|F7GFJ4_MACMU	TKTL1	NA	NA	NA	NA	NA	NA	NA	NA	NA	NA	NA	NA	NA	NA	NA	0.572	-0.308	0.308	-0.53
10093	P51857	F7GRQ0	tr|F7GRQ0|F7GRQ0_MACMU	AKR1D1	-0.0107	0.0133	-0.266	0.342	-0.394	0.0376	-0.399	-0.182	NA	NA	NA	NA	NA	NA	NA	0.235	0.15	0.0107	-0.272
9945	P51884	F6PRP0	tr|F6PRP0|F6PRP0_MACMU	LUM	0.153	-0.28	-0.157	0.0289	0	-0.0236	0.282	0.155	0.159	0.0199	-0.246	0.112	-0.133	-0.00369	0.0244	-0.245	0.344	-0.512	-0.0463
8571	P51888	F7FA61	tr|F7FA61|F7FA61_MACMU	PRELP	-0.0966	-0.165	-0.107	0.0322	-0.261	0.227	0.0533	0.105	-0.0731	0.125	0	0.00674	0.395	-0.0847	0.0262	-0.278	0.0404	-0.0662	-0.171
6536	P52209	F6VFM9	tr|F6VFM9|F6VFM9_MACMU	PGD	-0.165	0	0.219	0.285	0.27	0.126	0.266	1.69	-0.0766	1.22	0.0418	-0.298	-0.342	-0.149	0.085	-0.119	-0.27	-0.28	-0.352
5651	P52294	F7G2W5	tr|F7G2W5|F7G2W5_MACMU	KPNA1	NA	NA	NA	NA	NA	NA	NA	NA	NA	NA	NA	NA	NA	NA	NA	0.326	-0.326	0.374	-0.496
5067	P52306	F6XCQ0	tr|F6XCQ0|F6XCQ0_MACMU	RAP1GDS1	-0.288	0.0534	-0.0328	0.0871	0.0328	0.567	-0.0946	-0.335	NA	NA	NA	NA	NA	NA	NA	NA	NA	NA	NA
14786	P52434	F6QCQ2	tr|F6QCQ2|F6QCQ2_MACMU	POLR2H	0.153	-0.0185	-0.113	0.212	-0.0571	0.477	0.0337	0.684	-0.357	-0.309	-0.00467	0.266	0.0345	0	-0.31	NA	NA	NA	NA
15124	P52566	F7FJ95	tr|F7FJ95|F7FJ95_MACMU	ARHGDIB	0.136	-0.183	0.356	0.251	0.335	0.457	0.402	0.908	-0.0532	0.447	0.236	-0.377	-0.0913	0	-0.0734	-0.449	-0.129	-0.375	-0.196
7775	P52597	F6UEF5	tr|F6UEF5|F6UEF5_MACMU	HNRNPF	NA	NA	NA	NA	NA	NA	NA	NA	NA	NA	NA	NA	NA	NA	NA	0.246	-0.15	0.15	-0.226
2314	P52790	F7G0H9	tr|F7G0H9|F7G0H9_MACMU	HK3	0.303	-0.423	1.06	0	0.158	0.659	-0.199	0.183	0.671	0.7	0.0895	-0.121	-0.145	-0.206	0.0497	-0.0766	-0.184	-0.222	-0.449
12315	P52797	F6YLA0	tr|F6YLA0|F6YLA0_MACMU	EFNA3	0	0.004	-0.283	-0.125	0.0967	-0.0837	-0.147	-0.189	0.139	-0.415	0.136	0.0528	-0.293	0.151	-0.133	-0.0949	0.222	0.589	0.223
11155	P52799	F7HHG1	tr|F7HHG1|F7HHG1_MACMU	EFNB2	0.173	0.151	-0.28	0	0.0297	-0.269	-0.107	-0.352	-0.0568	-0.191	-0.245	-0.172	-0.3	0.157	0.276	0.161	0.171	0.419	0.0142
12669	P52803	F7GZC7	tr|F7GZC7|F7GZC7_MACMU	EFNA5	NA	NA	NA	NA	NA	NA	NA	NA	NA	NA	NA	NA	NA	NA	NA	-0.219	0.147	0.039	-0.039
12513	P52823	F7DYS7	tr|F7DYS7|F7DYS7_MACMU	STC1	-0.0604	0.415	0.0629	0.128	0.00209	0	-0.214	-0.0299	-0.057	-0.102	-0.245	1.23	-0.229	-0.238	-0.233	0.205	0.223	0.148	0.236
5172	P52888	F7FGE8	tr|F7FGE8|F7FGE8_MACMU	THOP1	-0.101	0.05	0.217	0.273	0.211	-0.328	-0.0931	0.0573	-0.395	-0.0899	0.00285	0.173	0.17	0.123	0	-0.14	-0.268	-0.251	-0.28
11611	P52907	F6R5F1	tr|F6R5F1|F6R5F1_MACMU	CAPZA1	-0.0323	0.0722	-0.0132	0.0792	0.0455	0.0723	0.0114	0.367	-0.245	-0.0819	0.093	-0.152	0.372	-0.0214	0.0417	-0.105	-0.168	0	-0.0887
13366	P52943	F7AEV7	tr|F7AEV7|F7AEV7_MACMU	CRIP2	NA	NA	NA	NA	NA	NA	NA	NA	0.115	0.162	0.0138	0.184	-0.0896	-0.177	0.356	0	-0.545	-0.872	-0.608
11755	P52954	F7EKH1	tr|F7EKH1|F7EKH1_MACMU	LBX1	NA	NA	NA	NA	NA	NA	NA	NA	0	-0.763	0.4	-0.0293	2.22	-0.303	0.307	NA	NA	NA	NA
11303	P53004	F7H4J1	tr|F7H4J1|F7H4J1_MACMU	BLVRA	NA	NA	NA	NA	NA	NA	NA	NA	0	0.327	0.327	-0.353	-0.0845	0.198	0.213	-0.0294	0.351	-0.375	-0.121
6072	P53041	F6XI05	tr|F6XI05|F6XI05_MACMU	PPP5C	0.0114	0.00124	0.175	0.477	-0.0962	-0.0666	-0.0672	-0.276	-0.226	0.00499	0.237	-0.0436	-0.11	0.0343	-0.0359	-0.15	0.139	0.317	0
4727	P53396	F6YSF2	tr|F6YSF2|F6YSF2_MACMU	ACLY	NA	NA	NA	NA	NA	NA	NA	NA	-0.368	0.531	0.555	-0.21	0.115	0	0.369	0.742	-0.182	-0.37	-0.159
1993	P53618	F7GF98	tr|F7GF98|F7GF98_MACMU	COPB1	NA	NA	NA	NA	NA	NA	NA	NA	0.00178	0.0409	-0.0362	-0.34	0.114	0	-0.0223	0.0025	-0.289	-0.638	0.171
1240	P53621	F6VET7	tr|F6VET7|F6VET7_MACMU	COPA	-0.191	0.136	-0.331	0.661	-0.00747	0.281	0.259	-0.0823	-0.474	0.481	-0.151	0.121	-0.0115	-0.0513	0.0689	0.0227	-0.231	0.305	0
6856	P53634	F7H3F1	tr|F7H3F1|F7H3F1_MACMU	CTSC	0.0681	-0.0281	0.0949	-0.441	-0.266	0.131	-0.207	0.606	0	0.335	0.212	0.0355	-0.254	-0.13	-0.173	0.387	0.191	-0.167	-0.159
9449	P53990	F6YAS0	tr|F6YAS0|F6YAS0_MACMU	IST1	NA	NA	NA	NA	NA	NA	NA	NA	NA	NA	NA	NA	NA	NA	NA	0.391	-0.391	0.557	-1.6
15341	P53999	F7AF44	tr|F7AF44|F7AF44_MACMU	SUB1	NA	NA	NA	NA	NA	NA	NA	NA	NA	NA	NA	NA	NA	NA	NA	-0.0197	-0.0341	0.287	0.0197
1001	P54098	F6VGG2	tr|F6VGG2|F6VGG2_MACMU	POLG	0.0757	-0.432	-0.0486	-0.651	0.0486	0.608	-0.649	0.115	NA	NA	NA	NA	NA	NA	NA	NA	NA	NA	NA
12473	P54108	F7FY55	tr|F7FY55|F7FY55_MACMU	CRISP3	-0.261	-0.42	0.328	-0.308	-0.485	-0.187	0	1.52	0.437	0.555	-0.521	-0.0662	-0.39	-0.608	0.101	0.484	0.0163	0.00347	0.201
4116	P54136	F7ED88	tr|F7ED88|F7ED88_MACMU	RARS	NA	NA	NA	NA	NA	NA	NA	NA	NA	NA	NA	NA	NA	NA	NA	0.306	-0.0148	0.0148	-0.484
2835	P54253	F7H1M4	tr|F7H1M4|F7H1M4_MACMU	ATXN1	1.59	-0.451	-0.0214	1.3	1.39	0	1.92	-0.434	-0.566	2.48	1.42	2.78	0.666	0.672	-0.885	-1.2	-0.137	-0.185	-0.0244
6395	P54578	F7AFL1	tr|F7AFL1|F7AFL1_MACMU	USP14	NA	NA	NA	NA	NA	NA	NA	NA	NA	NA	NA	NA	NA	NA	NA	-0.332	-0.899	1.01	0.332
8700	P54687	F6VFZ3	tr|F6VFZ3|F6VFZ3_MACMU	BCAT1	0.319	-0.0911	0.244	0.366	-0.0639	-0.156	-0.211	-0.251	-0.0743	0.113	0.376	0.0393	0.0963	0	-0.0239	-0.012	-0.128	0.0714	0.0208
12026	P54725	F7FM98	tr|F7FM98|F7FM98_MACMU	RAD23A	0.313	0.399	0.193	0.596	0.319	-0.284	-0.268	-0.387	-0.338	-0.276	0.163	0.441	0.333	0.0164	0	-0.27	-0.372	-0.436	-0.124
8449	P54727	F6W0K0	tr|F6W0K0|F6W0K0_MACMU	RAD23B	0.414	0.47	0.204	0.54	0.277	-0.535	-0.318	-0.563	-0.512	0	0.265	0.423	0.0472	0.0892	-0.0488	-0.267	-0.209	-0.312	-0.247
1752	P54753	F7ELA0	tr|F7ELA0|F7ELA0_MACMU	EPHB3	-0.401	-0.434	0.216	-0.231	-0.366	0.0254	0	-0.156	0.0256	0.0916	-0.513	0.242	-0.609	0.0582	0.0578	NA	NA	NA	NA
1579	P54756	F7GJT5	tr|F7GJT5|F7GJT5_MACMU	EPHA5	0.151	0.365	-0.24	0.293	0.0966	-0.011	-0.186	-0.0778	0.03	-0.456	0	0.636	-0.0881	0.527	-0.478	-0.388	-0.0365	0.578	0.547
1848	P54760	F7E595	tr|F7E595|F7E595_MACMU	EPHB4	0.06	0.011	-0.304	0.104	-0.336	0.238	-0.011	-0.162	NA	NA	NA	NA	NA	NA	NA	NA	NA	NA	NA
1818	P54764	F7EIX4	tr|F7EIX4|F7EIX4_MACMU	EPHA4	0.159	0.357	-0.298	0.225	0.0196	0.0226	-0.154	-0.203	-0.0166	-0.226	-0.0666	0.551	0	0.556	-0.231	-0.0864	0.166	0.862	-5.68e-05
4479	P54802	F7HF51	tr|F7HF51|F7HF51_MACMU	NAGLU	-0.246	-0.253	-0.392	0.019	0.173	0.0842	-0.612	-0.0352	0	0.0841	0.369	-0.485	-0.0319	0.124	-0.548	-0.0476	0.677	0.225	0.0555
3650	P54803	O02791	sp|O02791|GALC_MACMU	GALC	NA	NA	NA	NA	NA	NA	NA	NA	NA	NA	NA	NA	NA	NA	NA	0.0194	-0.144	-0.0194	0.185
12885	P54819	F7H131	tr|F7H131|F7H131_MACMU	AK2	NA	NA	NA	NA	NA	NA	NA	NA	NA	NA	NA	NA	NA	NA	NA	0.192	0.605	-0.609	-0.192
6216	P54868	F7DRJ3	tr|F7DRJ3|F7DRJ3_MACMU	HMGCS2	-0.613	-0.211	0.361	-0.559	0.296	-0.29	0.305	0.211	NA	NA	NA	NA	NA	NA	NA	NA	NA	NA	NA
11221	P54920	F6Z997	tr|F6Z997|F6Z997_MACMU	NAPA	NA	NA	NA	NA	NA	NA	NA	NA	0.131	0	0.0829	-0.142	-0.0909	-0.144	0.38	-0.315	0.157	-0.543	0.281
9128	P54922	F6REF0	tr|F6REF0|F6REF0_MACMU	ADPRH	NA	NA	NA	NA	NA	NA	NA	NA	NA	NA	NA	NA	NA	NA	NA	-0.275	0.601	0.0859	-0.0859
13855	P55001	F7BS81	tr|F7BS81|F7BS81_MACMU	MFAP2	-0.509	0	-0.098	-0.557	-0.204	-0.314	-0.276	0.408	0.114	-0.323	0.243	-0.464	0.148	-0.061	0.0327	0.409	0.268	0.391	0.185
14937	P55008	Q5TM25	sp|Q5TM25|AIF1_MACMU	AIF1	-0.156	-0.0552	0.0041	-0.4	0.0155	0.195	0.111	0.0548	0	-0.0351	-0.212	0.024	-0.19	-0.231	0.421	NA	NA	NA	NA
10921	P55042	F6VCR6	tr|F6VCR6|F6VCR6_MACMU	RRAD	NA	NA	NA	NA	NA	NA	NA	NA	NA	NA	NA	NA	NA	NA	NA	-0.276	0.076	-0.076	0.749
15479	P55056	H9H4I9	tr|H9H4I9|H9H4I9_MACMU	APOC4	0	-0.024	-0.362	-0.0267	-0.151	-0.0232	0.444	-0.145	0.0755	0.0952	-0.0573	-0.133	0.189	-0.0767	0.214	0.172	0.0915	0.47	0.492
7084	P55058	F6RAZ7	tr|F6RAZ7|F6RAZ7_MACMU	PLTP	0.086	-0.274	0	-0.443	-0.185	0.0622	-0.0316	-0.16	-0.0213	-0.0671	0.3	-0.431	0.39	0.175	-0.0505	0.486	0.453	0.576	0.276
1837	P55060	F7AUV0	tr|F7AUV0|F7AUV0_MACMU	CSE1L	-0.171	0.0717	0.17	-0.0408	-0.143	0.101	0.222	0.147	0.19	0	0.0373	-0.522	0.0604	-0.334	0.156	-0.144	-0.392	-0.633	-0.0199
2771	P55072	F6WT88	tr|F6WT88|F6WT88_MACMU	VCP	0.453	0.519	0.0383	0.641	-0.146	0.382	0	0.345	-0.618	2.19	-0.378	-0.188	-0.302	2.11	-0.507	-1.02	-0.744	-1.11	1.26
14196	P55083	H9H395	tr|H9H395|H9H395_MACMU	MFAP4	-0.0176	-0.00857	0	-0.473	-0.225	-0.0357	0.0347	-0.00577	1.23	-0.477	0.588	-0.385	0.117	0.121	-0.594	0.369	1.02	0.901	0.891
10290	P55087	F6TNF8	tr|F6TNF8|F6TNF8_MACMU	AQP4	0.386	0.00943	0.176	0.335	-0.189	-0.262	-0.197	0.0523	0.19	0.136	0	-0.11	-0.272	-0.642	-0.106	0.139	0.0352	-0.00297	-0.253
14087	P55145	F6ZSK8	tr|F6ZSK8|F6ZSK8_MACMU	MANF	-0.331	-0.201	-0.00124	-0.0733	0.0667	0	0.216	0.0443	0.195	-0.00135	-0.0153	0.104	-0.0641	-0.251	0.208	0.275	0.0294	0.148	-0.0165
4606	P55199	F7GCP2	tr|F7GCP2|F7GCP2_MACMU	ELL	NA	NA	NA	NA	NA	NA	NA	NA	NA	NA	NA	NA	NA	NA	NA	-0.0393	-0.862	0.0393	0.108
354	P55268	F7GZQ3	tr|F7GZQ3|F7GZQ3_MACMU	LAMB2	-0.493	-0.642	0.0197	-0.332	0.185	-0.242	0.396	-0.176	0.123	0	-0.253	-0.333	-0.245	-0.319	0.0767	0.119	0.0552	0.345	0.0136
2420	P55283	F7DGM2	tr|F7DGM2|F7DGM2_MACMU	CDH4	-0.0831	0	-0.258	0.128	-0.0375	0.323	-0.102	0.406	-0.037	-0.151	0.00304	0.135	0.0697	0.255	-0.0703	-0.0923	0.186	0.314	-0.00376
3247	P55285	F6YS32	tr|F6YS32|F6YS32_MACMU	CDH6	-0.139	-0.262	-0.0573	0	-0.0138	0.17	-0.113	0.048	0.00477	-0.162	0.0443	0.0186	0.062	-0.0254	-0.0141	0.236	0.173	0.302	-0.0792
2748	P55286	F7A8W3	tr|F7A8W3|F7A8W3_MACMU	CDH8	0.155	-0.018	0.000114	0.101	0.099	0.0089	0	-0.294	-0.0372	0.133	-0.114	-0.068	-0.207	0.324	-0.164	-0.266	0.0742	0.54	-0.0373
2731	P55287	F7GFF0	tr|F7GFF0|F7GFF0_MACMU	CDH11	0.0961	-0.036	-0.141	0	0.0582	0.258	0.107	0.0731	-0.00329	-0.161	-0.0255	-0.155	0.165	0.134	0.154	-0.825	0.381	-0.321	-0.105
4631	P55290	F7GKB6	tr|F7GKB6|F7GKB6_MACMU	CDH13	0.283	0.294	-0.0849	-0.198	0.177	0.0234	0.0275	-0.0136	-0.0204	-0.0741	-0.0279	0.351	-0.152	0.376	-0.306	-0.0759	0.466	0.72	0
2457	P55786	F6TM63	tr|F6TM63|F6TM63_MACMU	NPEPPS	0.136	0.37	0.242	0.356	0.27	-0.165	-0.199	-0.2	-0.17	-0.106	0.416	0.0997	0.00797	0	-0.0838	-0.0357	-0.215	0.0358	-0.31
6957	P55795	F7BG13	tr|F7BG13|F7BG13_MACMU	HNRNPH2	NA	NA	NA	NA	NA	NA	NA	NA	NA	NA	NA	NA	NA	NA	NA	-0.282	0.0919	-0.0497	0.0497
6091	P55809	F7GQS5	tr|F7GQS5|F7GQS5_MACMU	OXCT1	0.75	0.422	0.131	0.387	0.835	-0.275	-0.131	-0.165	0	-0.149	0.315	0.403	0.114	0.176	-0.0253	-0.337	-0.58	-0.0334	-0.419
2613	P55884	F6RP85	tr|F6RP85|F6RP85_MACMU	EIF3B	NA	NA	NA	NA	NA	NA	NA	NA	NA	NA	NA	NA	NA	NA	NA	0.0967	0.254	-0.0967	-1.05
9515	P56159	F7GPD1	tr|F7GPD1|F7GPD1_MACMU	GFRA1	NA	NA	NA	NA	NA	NA	NA	NA	NA	NA	NA	NA	NA	NA	NA	-0.247	0.46	-0.369	0.247
16155	P56277	F6QM91	tr|F6QM91|F6QM91_MACMU	CMC4	NA	NA	NA	NA	NA	NA	NA	NA	NA	NA	NA	NA	NA	NA	NA	-0.0732	-0.364	0.313	0.0732
1621	P56524	F6VW34	tr|F6VW34|F6VW34_MACMU	HDAC4	NA	NA	NA	NA	NA	NA	NA	NA	-1.55	0.511	0.452	-0.404	0.155	0.11	1.03	0	-1.4	-0.881	-1.27
14278	P56537	H9H3Z6	tr|H9H3Z6|H9H3Z6_MACMU	EIF6	0.0443	0.352	-0.109	0.436	0	0.464	-0.24	0.289	-0.453	-0.11	0.544	-0.283	0.246	0.297	-0.0364	-0.0375	0.161	-0.204	-0.168
9226	P56705	F7EZ32	tr|F7EZ32|F7EZ32_MACMU	WNT4	-0.104	-0.0216	-0.171	0.113	-0.0609	0.122	-0.248	0.0151	-0.149	-0.472	0.183	0.469	0.113	-0.126	-0.315	0.0835	0.156	0	0.241
6023	P56817	F7CQI1	tr|F7CQI1|F7CQI1_MACMU	BACE1	-0.18	-0.295	0.294	-0.127	-0.333	-0.2	0.148	0.156	-0.0198	-0.239	-0.0562	0.0256	0	0.0157	-0.0156	0.0419	0.377	0.627	0.164
12133	P56915	F6UZF1	tr|F6UZF1|F6UZF1_MACMU	GSC	NA	NA	NA	NA	NA	NA	NA	NA	NA	NA	NA	NA	NA	NA	NA	0.205	-0.205	-0.637	0.7
8400	P56975	F7H6N1	tr|F7H6N1|F7H6N1_MACMU	NRG3	0.00252	0.129	-0.13	-0.0201	-0.0983	0.0122	-0.0406	-0.0855	0	-0.175	0.0767	0.0711	-0.29	0.0795	-0.0824	-0.128	0.232	0.84	0.127
12682	P57087	F7E156	tr|F7E156|F7E156_MACMU	JAM2	0.154	-0.325	-0.191	0.0337	-0.246	-0.0139	-0.112	0.0399	-0.00411	-0.36	-0.23	0.133	0.0325	-0.066	0	0.215	0.283	0.213	0.144
10320	P57721	F7EKE9	tr|F7EKE9|F7EKE9_MACMU	PCBP3	0.265	0.318	-0.0772	0.214	0.121	-0.0513	0.116	0.13	-0.223	0	0.0919	-0.301	0.0861	0.366	-0.0822	-0.236	-0.55	-0.183	-0.378
8490	P57723	F6ZFV1	tr|F6ZFV1|F6ZFV1_MACMU	PCBP4	0.202	0.473	0.0459	0.153	-0.0414	-0.0181	0.103	-0.0246	-0.0124	0	-0.291	-0.0111	0.216	0.292	-0.338	NA	NA	NA	NA
6275	P58005	F7HEU9	tr|F7HEU9|F7HEU9_MACMU	SESN3	NA	NA	NA	NA	NA	NA	NA	NA	NA	NA	NA	NA	NA	NA	NA	-0.0329	0.351	-0.405	0.0329
2761	P58215	F6UN81	tr|F6UN81|F6UN81_MACMU	LOXL3	0.0125	0.0629	0.204	0.661	-0.137	-0.0513	-0.0591	-0.0665	-0.219	0.141	0	-0.146	0.0779	-0.0525	-0.029	0.482	0.42	0.316	-0.122
9452	P58304	F7AP06	tr|F7AP06|F7AP06_MACMU	VSX2	NA	NA	NA	NA	NA	NA	NA	NA	0.0329	-0.174	0.222	0.136	-0.464	0	-0.501	NA	NA	NA	NA
15424	P58546	F7H568	tr|F7H568|F7H568_MACMU	MTPN	0.901	0.708	0.076	0.585	0	-0.0442	-0.341	-0.44	-0.268	0.199	0.33	-0.158	0.226	0.0843	0.0695	-0.128	-0.405	-0.585	-0.356
16048	P59665	P60030	sp|P60030|DEF1_MACMU	DEFA1	-0.171	-0.298	0.165	0	-0.0374	0.12	-0.0257	1.4	-0.214	0.408	0.0134	-0.148	-0.74	-0.546	0.45	0.335	-0.031	0.445	0.451
16152	P59768	F7ASR8	tr|F7ASR8|F7ASR8_MACMU	GNG2	NA	NA	NA	NA	NA	NA	NA	NA	NA	NA	NA	NA	NA	NA	NA	0.000981	0.114	-0.281	-0.000981
13523	P59796	F6Q080	tr|F6Q080|F6Q080_MACMU	GPX6	NA	NA	NA	NA	NA	NA	NA	NA	0	0.298	0.718	0.0117	-0.784	-0.324	-0.177	-0.432	0.149	0.227	-0.325
16165	P60022	O18794	sp|O18794|DEFB1_MACMU	DEFB1	NA	NA	NA	NA	NA	NA	NA	NA	NA	NA	NA	NA	NA	NA	NA	-0.313	0.097	-0.097	0.412
12721	P60033	F6WY45	tr|F6WY45|F6WY45_MACMU	CD81	0.0793	-0.0404	0.0719	-0.128	0.2	0.87	0	-0.16	-0.223	0.13	-0.109	-0.15	0.683	-0.0369	-0.0447	0.442	0.135	-0.0339	0.24
12395	P60174	P15426	sp|P15426|TPIS_MACMU	TPI1	0.15	0.757	0.113	1.08	-0.172	-0.00155	-0.0374	-0.0642	-0.0467	0.33	0.301	-0.415	0.162	0	0.0921	-0.073	-0.196	-0.395	0.317
11455	P60201	F6Q2K2	tr|F6Q2K2|F6Q2K2_MACMU	PLP1	0.405	-0.339	0.117	0.0897	-0.305	0.00721	0.124	-0.32	0.348	0.088	-0.548	-0.305	0	-0.613	0.946	-0.114	-0.237	-0.454	0.458
15457	P60520	F6W1M5	tr|F6W1M5|F6W1M5_MACMU	GABARAPL2	0.363	0.105	0.155	0.291	0.292	-0.0883	-0.122	-0.442	-0.403	-0.144	0.174	0.367	0	0.0733	-0.0803	-0.0435	-0.0463	-0.187	0.032
14733	P60660	F7HNE5	tr|F7HNE5|F7HNE5_MACMU	MYL6	-0.2	0.00888	0.00795	0.197	0.219	-0.0119	0.0433	0.437	0.879	0.689	-0.502	0.206	-0.278	-0.498	-0.367	-0.194	-0.478	-0.677	0
8822	P60709	F6X9G9	tr|F6X9G9|F6X9G9_MACMU	ACTB	0.123	0.22	0.228	0.483	0.308	0.505	-0.16	0.426	-0.353	0.515	-0.0663	-0.286	-0.136	0.114	0	-0.685	-0.588	-0.886	-0.203
8345	P60842	F6ZET3	tr|F6ZET3|F6ZET3_MACMU	EIF4A1	0.0201	0.473	0.034	0.363	-0.0493	0.311	-0.073	0.087	-0.159	0.117	0.139	0	-0.00265	0.123	-0.00076	-0.107	-0.241	-0.165	-0.0251
13579	P60880	P60877	sp|P60877|SNP25_MACMU	SNAP25	0.164	0.0307	-0.0333	-0.0662	0	-0.203	-0.328	0.359	-0.205	0.101	0.209	0.19	0.0999	-0.0551	0.0423	-0.238	-0.53	-0.126	1.42
12440	P60900	F6W663	tr|F6W663|F6W663_MACMU	PSMA6	-0.18	-0.239	0.309	-0.351	-0.0286	0.523	0.101	0.439	0.0579	0.198	-0.021	-0.0318	-0.0765	0.0134	0.193	0	0.178	-0.151	-0.0233
14004	P60953	F6RBZ7	tr|F6RBZ7|F6RBZ7_MACMU	CDC42	-0.336	-0.225	0.437	0.377	-0.0906	0	1.2	1.01	-0.0135	0.371	-0.0172	0.0392	-0.0752	0.0442	0.116	-0.36	-0.511	-0.968	1.03
14463	P60981	F6TEG7	tr|F6TEG7|F6TEG7_MACMU	DSTN	NA	NA	NA	NA	NA	NA	NA	NA	0.279	0	0.0739	-0.317	-0.193	-0.419	0.0286	0.00968	-0.869	0.471	-0.0711
13475	P61006	F7AVY7	tr|F7AVY7|F7AVY7_MACMU	RAB8A	0.253	0.261	0.144	0.513	0.115	0.188	-0.113	0	-0.0502	0.167	-0.142	-0.105	-0.0149	0.184	0.131	-0.0213	-0.276	-0.274	-0.194
13688	P61019	F7HQQ7	tr|F7HQQ7|F7HQQ7_MACMU	RAB2A	1.36	0.455	0.356	0.32	-0.0741	-0.061	0.12	-0.517	-0.0255	0.155	-0.269	0.0981	0.419	-0.0706	0.0656	-0.0481	-0.115	-0.0663	0
13678	P61020	F7HL78	tr|F7HL78|F7HL78_MACMU	RAB5B	NA	NA	NA	NA	NA	NA	NA	NA	NA	NA	NA	NA	NA	NA	NA	-0.0115	-0.422	0.0115	0.0936
13970	P61081	F6Z6D4	tr|F6Z6D4|F6Z6D4_MACMU	UBE2M	0.605	0.271	-0.00414	0.246	-0.0461	0.432	-0.125	-0.361	-0.27	0.35	0.325	-0.148	0.0937	-0.0417	0.172	-0.29	0	-0.0825	0.238
13646	P61086	F6UEX6	tr|F6UEX6|F6UEX6_MACMU	UBE2K	0.432	0.489	0.289	0.239	0.264	0	-0.0161	-0.206	-0.304	-0.0351	0.697	0.242	0.335	0.113	-0.0553	-0.484	-0.0885	-0.384	-0.326
13190	P61106	F7G3Z8	tr|F7G3Z8|F7G3Z8_MACMU	RAB14	-0.258	-0.318	0.315	-0.173	0.353	-0.308	0.486	-0.0403	0.176	0.236	-0.235	0.0879	-0.0379	0.158	-0.00232	0.198	-0.0754	0	0.128
7784	P61158	F6TM14	tr|F6TM14|F6TM14_MACMU	ACTR3	0.195	0.132	0.217	0.434	0.318	0.513	-0.142	1.21	-0.0171	0.33	0	-0.417	-0.127	0.202	-0.00776	-0.572	-0.242	-0.29	-0.321
4684	P61221	F7GPG0	tr|F7GPG0|F7GPG0_MACMU	ABCE1	NA	NA	NA	NA	NA	NA	NA	NA	0.082	-0.113	0.132	-0.385	0	-0.391	0.173	0.498	0.0552	-0.489	-0.273
14097	P61224	F7B9T3	tr|F7B9T3|F7B9T3_MACMU	RAP1B	NA	NA	NA	NA	NA	NA	NA	NA	0	-0.127	-0.271	-0.239	0.371	0.161	-0.0487	0.45	0.226	-0.0867	0.0898
12072	P61247	F7G4W4	tr|F7G4W4|F7G4W4_MACMU	RPS3A	0.0751	0.08	0.0951	-0.0751	0.0868	-0.176	-0.317	-0.297	NA	NA	NA	NA	NA	NA	NA	NA	NA	NA	NA
11887	P61266	F7DNS6	tr|F7DNS6|F7DNS6_MACMU	STX1B	0.274	0.567	0.281	-0.107	0.137	-0.59	-0.349	-0.772	-0.441	0.0145	0.0755	0.336	0	-0.207	-0.144	-0.185	0.355	0.246	-0.251
15551	P61278	F6TGD4	tr|F6TGD4|F6TGD4_MACMU	SST	0.188	0.301	-0.371	-0.0968	-0.403	0.179	-0.0493	0.336	0.0145	-0.022	-0.718	0.0587	0	0.407	-0.0858	-0.408	-0.0374	0.346	0.335
15236	P61366	F7GQU4	tr|F7GQU4|F7GQU4_MACMU	OSTN	NA	NA	NA	NA	NA	NA	NA	NA	NA	NA	NA	NA	NA	NA	NA	-0.464	-0.268	0.268	0.613
15662	P61457	F7F694	tr|F7F694|F7F694_MACMU	PCBD1	0.233	0.695	-0.0365	1.26	-0.236	0.474	-0.277	-0.342	-0.324	0.122	0.658	-0.471	0.537	-0.155	0.309	0.201	-0.322	0	-0.117
14949	P61586	F7GVQ1	tr|F7GVQ1|F7GVQ1_MACMU	RHOA	NA	NA	NA	NA	NA	NA	NA	NA	-0.102	0	0.415	-0.133	0.433	0.248	0.161	0.00433	-0.198	-0.413	-0.555
13764	P61601	F6WE76	tr|F6WE76|F6WE76_MACMU	NCALD	NA	NA	NA	NA	NA	NA	NA	NA	NA	NA	NA	NA	NA	NA	NA	0.0296	0.763	-0.346	-0.0296
15756	P61604	F7BG90	tr|F7BG90|F7BG90_MACMU	HSPE1	0.0726	-0.347	-0.133	0.279	0.245	0.124	0.358	0.363	-0.179	-0.27	0.359	-0.0338	0.187	0	-0.323	0.558	-0.301	-0.303	-0.874
14965	P61626	P30201	sp|P30201|LYSC_MACMU	LYZ	0.579	1.06	0.447	0.174	-0.302	-0.776	-0.461	-0.125	0.0407	-0.384	0.3	0.576	0.0281	-1.15	-0.513	0.102	-0.521	0	-0.383
13765	P61758	F6WUT9	tr|F6WUT9|F6WUT9_MACMU	VBP1	0.345	-0.188	0.172	-0.114	0.0162	0.198	-0.492	0.0869	NA	NA	NA	NA	NA	NA	NA	-0.0162	-1.01	-0.663	0.212
15560	P61769	Q6V7J5	sp|Q6V7J5|B2MG_MACMU	B2M	0.647	0.362	-0.177	-0.48	-0.245	-0.498	0.146	-0.37	0.0486	-0.0504	0.0442	0.105	0.0567	0.402	-0.412	0.243	0	-0.0291	-0.136
7975	P61812	F6ZJX4	tr|F6ZJX4|F6ZJX4_MACMU	TGFB2	-0.17	-0.29	0.16	-0.213	-0.254	0.366	-0.409	0.122	-0.115	0	0.0325	-0.333	0.202	-0.22	0.000299	0.67	0.167	0.238	-0.248
14713	P61916	F7HRU3	tr|F7HRU3|F7HRU3_MACMU	NPC2	0	0.112	-0.0255	-0.241	0.0299	-0.154	-0.184	-0.232	0.00319	-0.23	0.323	-0.331	-0.0733	0.0145	-0.231	0.107	0.236	0.115	0.0131
16114	P61925	F6Y6J6	tr|F6Y6J6|F6Y6J6_MACMU	PKIA	0.124	-0.118	0.481	0	0.141	1.37	-0.658	-0.547	-1.3	-0.504	0.511	0.626	0.93	0.00221	0.387	-0.312	-0.765	-0.421	-0.153
15432	P61970	F7CVN9	tr|F7CVN9|F7CVN9_MACMU	NUTF2	0.0265	0.331	0.308	0.478	0	-0.263	-0.426	-0.172	-0.634	0.207	0.433	-0.485	0.0691	0.104	-0.0632	-0.15	-0.0673	0.268	-0.471
6765	P61978	F6WZ20	tr|F6WZ20|F6WZ20_MACMU	HNRNPK	0.628	0.209	0	0.332	0.303	0.07	-0.0113	-0.257	-0.145	0.00254	0.0392	0.0944	-0.0562	0.211	-0.257	-0.366	-0.499	-0.495	-0.277
12509	P61981	F6XLR8	tr|F6XLR8|F6XLR8_MACMU	YWHAG	0.87	0.984	0.679	0.659	0.739	-0.715	-0.826	-0.991	-0.948	-0.354	1.14	0.59	0	0.012	0.0556	-0.503	-0.717	-0.425	-0.82
14000	P62081	F7H2G1	tr|F7H2G1|F7H2G1_MACMU	RPS7	NA	NA	NA	NA	NA	NA	NA	NA	-0.0901	-0.288	0	0.429	0.0172	-0.205	0.191	NA	NA	NA	NA
14839	P62158	F7F3L5	tr|F7F3L5|F7F3L5_MACMU	CALM1	0.374	0.141	0.645	1.38	1.02	-0.219	-0.384	-0.337	-0.182	-0.117	1.17	0.735	0	0.0116	0.121	-0.542	-0.322	-0.402	-0.446
14906	P62249	F6T928	tr|F6T928|F6T928_MACMU	RPS16	0.667	0.446	-0.565	-0.454	0.449	0.849	-0.379	-0.55	0.0492	0.197	-0.355	-0.0289	0.0641	0.162	0.144	-0.151	-0.2	-0.371	0
14541	P62258	F7HDC2	tr|F7HDC2|F7HDC2_MACMU	YWHAE	0.691	0.181	0.536	0.0285	0.478	-0.39	0	-0.0381	-0.711	-0.335	1.51	0.846	0.306	0.273	-0.00488	-0.0458	-0.124	-0.426	-0.494
14797	P62277	F6Y9M4	tr|F6Y9M4|F6Y9M4_MACMU	RPS13	NA	NA	NA	NA	NA	NA	NA	NA	0.391	0.377	-1.09	-0.571	-0.777	0	0.0395	-0.164	-0.367	0.144	0.000114
16291	P62328	F7BZ29	tr|F7BZ29|F7BZ29_MACMU	TMSB4X	0.45	0.281	0.133	0.185	0.17	0.0507	-0.121	-0.287	-0.377	-0.282	0.254	0.141	-0.00494	-0.0823	0	-0.0362	-0.258	0.0687	-0.319
8858	P62333	F7ALC4	tr|F7ALC4|F7ALC4_MACMU	PSMC6	0.114	0.0817	-0.0957	0.351	-0.174	0.282	0.0278	-0.255	-0.168	0.554	-0.073	-0.319	0.047	0.00179	0.467	-0.172	0	-0.0309	-0.141
15651	P62380	F6W6D9	tr|F6W6D9|F6W6D9_MACMU	TBPL1	NA	NA	NA	NA	NA	NA	NA	NA	0.287	-0.612	0	0.607	-0.284	-0.184	0.806	NA	NA	NA	NA
13284	P62491	F7HLD9	tr|F7HLD9|F7HLD9_MACMU	RAB11A	0	-0.0419	0.484	0.329	-0.302	0.238	-0.379	0.15	-0.245	0.133	-0.193	-0.0441	-0.125	-0.096	-0.0521	0.179	0.177	0.265	0.0801
7633	P62495	F7CTK0	tr|F7CTK0|F7CTK0_MACMU	ETF1	NA	NA	NA	NA	NA	NA	NA	NA	0.306	0.45	0.0295	0.284	-0.511	0.204	0	-0.127	-0.00121	-0.13	-0.0539
13656	P62633	F6PPB3	tr|F6PPB3|F6PPB3_MACMU	CNBP	0.125	0.534	0.0901	0.733	-0.123	0.0809	-0.224	-0.119	0.0556	0.0723	0	-0.765	0.0392	0.238	-0.251	-0.146	-0.411	-0.0113	-0.648
10206	P62714	F7HSM1	tr|F7HSM1|F7HSM1_MACMU	PPP2CB	NA	NA	NA	NA	NA	NA	NA	NA	NA	NA	NA	NA	NA	NA	NA	-0.0226	-0.0194	0.0194	0.158
12532	P62753	F6YAF2	tr|F6YAF2|F6YAF2_MACMU	RPS6	NA	NA	NA	NA	NA	NA	NA	NA	-0.355	0.228	0.0734	-0.486	-0.0891	0.273	0	NA	NA	NA	NA
15720	P62805	F7HAP8	tr|F7HAP8|F7HAP8_MACMU	HIST1H4A	-0.408	-0.304	0.23	-0.108	0.365	0.4	-0.0903	1.64	0.0584	0.733	-0.266	-0.379	-0.625	-0.19	0.72	-0.0901	0.327	0	0.131
15390	P62807	F7H0C0	tr|F7H0C0|F7H0C0_MACMU	HIST1H2BC	-0.906	-0.508	0.0051	0	0.561	0.557	-0.186	0.764	0.0771	0.0805	-0.457	-0.272	-0.22	0.0252	0.255	-0.443	0.163	-0.379	-0.323
13697	P62820	F7E770	tr|F7E770|F7E770_MACMU	RAB1A	NA	NA	NA	NA	NA	NA	NA	NA	NA	NA	NA	NA	NA	NA	NA	0.298	-0.12	-0.117	0.117
13082	P62826	F7H2M4	tr|F7H2M4|F7H2M4_MACMU	RAN	0.479	0.651	0.0573	1.03	0.0591	0	-0.266	-0.427	-0.622	0.187	0.301	-0.374	0.385	0.37	-0.055	-0.578	-0.0517	-0.937	-0.163
15361	P62851	F7HQ35	tr|F7HQ35|F7HQ35_MACMU	RPS25	NA	NA	NA	NA	NA	NA	NA	NA	-0.337	0.152	0.0468	-0.215	-0.37	0.194	0.162	0.162	-0.472	-0.246	0
16185	P62857	F7AA98	tr|F7AA98|F7AA98_MACMU	RPS28	0.563	0.511	0.627	0.799	0.219	-0.416	-0.307	-0.179	-0.516	-0.22	0.109	0.0601	0.378	0.2	-0.0195	0	-0.445	-0.446	-0.232
9554	P62873	F7FXA9	tr|F7FXA9|F7FXA9_MACMU	GNB1	0.058	0.402	0.417	0.0254	0.471	-0.137	-0.261	-0.349	-0.0868	0.0248	0.0445	0.672	-0.321	0.0332	-0.347	-1	-0.431	0	-0.757
15631	P62877	F7EBF3	tr|F7EBF3|F7EBF3_MACMU	RBX1	NA	NA	NA	NA	NA	NA	NA	NA	-0.544	-0.0322	0.278	-0.451	0.294	0	0.224	NA	NA	NA	NA
15637	P62888	F7GQT7	tr|F7GQT7|F7GQT7_MACMU	RPL30	NA	NA	NA	NA	NA	NA	NA	NA	NA	NA	NA	NA	NA	NA	NA	-0.126	0.227	0.1	-0.1
13272	P62906	F7AMR7	tr|F7AMR7|F7AMR7_MACMU	RPL10A	0.289	0.457	-0.0084	0.41	0.0643	0.253	-0.0067	-0.407	-0.262	0.299	-0.247	-0.329	0	0.346	-0.333	-0.158	0.228	0.128	-0.529
14353	P62937	P62940	sp|P62940|PPIA_MACMU	PPIA	0.53	0.807	0.236	0.74	0.285	-0.209	-0.334	-0.513	-0.796	0	1.04	-0.448	0.0957	0.287	0.0372	-0.0278	-0.54	-0.453	-0.448
15586	P62942	F7GBW1	tr|F7GBW1|F7GBW1_MACMU	FKBP1A	0.351	0.266	0.9	0.364	0.581	-0.687	0.679	-0.447	-0.253	-0.139	1.4	0.768	0	0.0212	-0.0206	-0.532	-0.00152	-0.298	-0.215
14573	P62979	F6Q836	tr|F6Q836|F6Q836_MACMU	RPS27A	-0.0733	0.461	0.124	0.616	0.324	-0.431	-0.48	-0.657	-0.643	-0.445	0.639	0.0951	0.06	0.573	0.0877	-0.177	-0.245	0	-0.0798
11143	P62995	F6R8Y2	tr|F6R8Y2|F6R8Y2_MACMU	TRA2B	NA	NA	NA	NA	NA	NA	NA	NA	NA	NA	NA	NA	NA	NA	NA	0.025	-0.025	0.141	-0.163
2465	P63010	F6WBB5	tr|F6WBB5|F6WBB5_MACMU	AP2B1	0.455	0.191	-0.0264	0.0547	0.252	-0.0751	-0.21	-0.578	-0.367	-0.261	0.0363	-0.0632	0.826	0.156	0	-0.0677	0.126	0.069	-0.0663
15541	P63027	Q9N0Y0	sp|Q9N0Y0|VAMP2_MACMU	VAMP2	0.0584	0.192	0.0518	0.156	0.108	-0.03	-0.199	-0.396	-0.394	-0.165	-0.12	0.276	0.193	0.204	-0.181	-0.059	0	0.369	-0.141
12640	P63104	F7EFF6	tr|F7EFF6|F7EFF6_MACMU	YWHAZ	1.26	1.47	1.48	1.43	1.52	-0.637	-0.69	-0.663	-0.718	-0.0186	1.61	1.32	0.321	0.473	0	-0.313	-0.648	-0.356	-0.495
14936	P63208	F7H810	tr|F7H810|F7H810_MACMU	SKP1	0.717	0.663	0.622	0.659	0.565	-0.362	-0.355	-0.518	-0.0693	-0.11	0.733	0.532	0.0317	-0.054	0.352	-0.111	0	-0.26	-0.149
14701	P63241	F7HNN9	tr|F7HNN9|F7HNN9_MACMU	EIF5A	0.602	0.538	0.184	0.516	-0.0275	-0.47	-0.0996	-0.64	0.135	0.341	0	0.0946	0.152	0.0727	-0.0127	-0.142	-0.208	-0.329	-0.14
10721	P63244	F7DUC8	tr|F7DUC8|F7DUC8_MACMU	RACK1	NA	NA	NA	NA	NA	NA	NA	NA	0	1.52	-0.213	0.0772	0.172	0.104	0.118	-0.0523	-0.685	-0.375	-0.501
8780	P63267	F6UA63	tr|F6UA63|F6UA63_MACMU	ACTG2	0.396	0.238	0.189	0.363	0.213	0.435	-0.251	0.327	-0.33	0.288	0	-0.431	-0.215	0.0947	-0.248	-0.591	-0.505	-0.884	-0.313
15974	P63302	P63303	sp|P63303|SELW_MACMU	SELENOW	0.88	-0.0323	0.203	0.182	0.0323	-0.865	-0.109	-0.751	NA	NA	NA	NA	NA	NA	NA	NA	NA	NA	NA
16293	P63313	F7F536	tr|F7F536|F7F536_MACMU	TMSB10	0.341	0.478	0.419	0.409	0.505	-0.294	0.0685	0.0257	-0.508	-0.274	1.12	0.357	-0.194	-0.0577	-0.319	-0.273	-0.391	0	-0.394
10265	P67775	F7H808	tr|F7H808|F7H808_MACMU	PPP2CA	0	0.216	0.281	0.218	-0.147	0.174	-0.239	-0.124	-0.49	0.244	0.117	-0.254	0.0824	0.118	0.21	-0.253	-0.441	-0.478	-0.259
12838	P67936	H9H3N9	tr|H9H3N9|H9H3N9_MACMU	TPM4	0.195	-0.101	0.047	-0.123	0	-0.636	0.291	-0.271	-0.0476	-0.0079	-0.0828	0.00842	0.0146	-0.00711	0.195	0.0523	-0.0644	0.133	0.211
8770	P68032	F7F210	tr|F7F210|F7F210_MACMU	ACTC1	NA	NA	NA	NA	NA	NA	NA	NA	0.0677	0.593	0	0.0243	-0.543	-0.467	-0.164	NA	NA	NA	NA
6922	P68104	F7AW94	tr|F7AW94|F7AW94_MACMU	EEF1A1	0.249	0.702	-0.0587	0.497	0.00251	-0.0533	0.21	0.142	-0.109	0.0512	-0.0204	-0.0318	0	0.0559	0.0233	-0.187	-0.459	-0.423	-0.258
6987	P68363	F7GY36	tr|F7GY36|F7GY36_MACMU	TUBA1B	1.23	0.858	0.608	1.45	-0.173	-0.0329	-0.175	-0.198	-0.251	1.05	0.372	-0.289	0.262	-0.165	0.916	0.297	0	-0.126	-0.245
7009	P68366	F6QRE8	tr|F6QRE8|F6QRE8_MACMU	TUBA4A	1.3	0.679	0.574	1.45	-0.171	0	-0.248	-0.499	-0.034	0.982	0.0989	-0.0475	0.406	-0.0822	0.685	-0.0719	-0.502	-0.308	0.34
7159	P68371	F7GW57	tr|F7GW57|F7GW57_MACMU	TUBB4B	0.665	0.419	0.274	0.746	-0.07	-0.039	-0.0239	-0.028	-0.245	0.987	0.132	-0.332	0.33	-0.276	0.85	0.219	-0.089	-0.145	0
12765	P68402	F6WXP0	tr|F6WXP0|F6WXP0_MACMU	PAFAH1B2	NA	NA	NA	NA	NA	NA	NA	NA	0.277	0.442	-0.218	0	-0.461	-0.183	0.21	0.0849	0.246	-0.062	-0.105
14938	P68871	P02026	sp|P02026|HBB_MACMU	HBB	-0.821	-0.71	-0.487	2.44	-0.471	0.581	-0.00027	2.23	0.16	1.54	-0.498	-1.43	1.47	2.77	0	-0.927	1.47	-1.07	0.448
1074	P69849	F7G537	tr|F7G537|F7G537_MACMU	NOMO3	NA	NA	NA	NA	NA	NA	NA	NA	0	-0.452	-0.275	0.0537	-0.0405	0.122	-0.239	-0.242	0.00272	0.118	0.0905
14861	P69892	P68077	sp|P68077|HBG_MACMU	HBG2	NA	NA	NA	NA	NA	NA	NA	NA	0.175	0	-0.274	-0.0357	0.82	3.17	0.145	-0.226	0.744	-0.253	-0.0732
15036	P69905	G7NQC3	tr|G7NQC3|G7NQC3_MACMU	HBA1	-0.426	-0.519	-0.426	2.08	-0.339	0.393	-0.0765	1.19	0.113	1.14	-0.37	-0.905	1.24	1.82	-0.0598	-0.314	0.899	-0.29	0.24
10077	P78310	F7FY16	tr|F7FY16|F7FY16_MACMU	CXADR	0.333	-0.0809	-0.0875	0.115	0.0434	0.49	-0.0785	-0.091	0.152	-0.0476	-0.116	-0.0838	0.525	0.144	0.108	-0.556	0	-0.0772	0.304
10002	P78324	F7HFE7	tr|F7HFE7|F7HFE7_MACMU	SIRPA	0.129	0.0801	0.126	-0.0419	0.016	-0.00772	-0.146	-0.146	0.125	-0.219	-0.247	0.247	0.0362	0.115	-0.131	-0.312	0.256	-0.217	0
3458	P78352	F7D120	tr|F7D120|F7D120_MACMU	DLG4	0.214	0.0422	-0.341	0.107	-0.342	-0.0422	-0.116	0.0805	NA	NA	NA	NA	NA	NA	NA	NA	NA	NA	NA
5953	P78371	F7GQC0	tr|F7GQC0|F7GQC0_MACMU	CCT2	NA	NA	NA	NA	NA	NA	NA	NA	0.611	0.244	-0.286	0.278	0.183	-0.0126	-0.0815	-0.252	0.297	-0.0206	0
6194	P78386	F7E5H3	tr|F7E5H3|F7E5H3_MACMU	KRT85	NA	NA	NA	NA	NA	NA	NA	NA	0	-0.00233	0.39	0.00377	-0.0696	0.0707	-0.103	NA	NA	NA	NA
12625	P78417	F6SPY0	tr|F6SPY0|F6SPY0_MACMU	GSTO1	0.179	-0.0189	0.0256	0.647	-0.00509	-0.506	-0.244	0	-0.375	0.342	0.231	-0.424	-0.178	0.0902	0.00107	-0.455	0.312	-0.431	0.171
10411	P78423	H9H2N5	tr|H9H2N5|H9H2N5_MACMU	CX3CL1	0.0753	-0.0927	-0.0914	-0.0592	-0.109	-0.101	0.209	-0.0382	0.486	0.0126	0.00368	0.609	-0.185	-0.106	-0.222	0.042	0	0.159	0.0499
831	P78504	F7FGM9	tr|F7FGM9|F7FGM9_MACMU	JAG1	-0.117	0	-0.259	-0.323	-0.0279	-0.132	0.127	-0.129	0.11	0.0585	-0.107	0.194	-0.206	0.0182	-0.336	0.00365	0.0933	0.271	0.169
6687	P78539	F6ZFL9	tr|F6ZFL9|F6ZFL9_MACMU	SRPX	0.355	-0.434	0.152	0	-0.264	0.183	-0.213	-0.408	0.2	0.0857	-0.0927	-0.207	0.144	-0.0566	-0.0304	0.325	0.235	0.163	-0.0469
100	P78559	F7FGX1	tr|F7FGX1|F7FGX1_MACMU	MAP1A	0.727	0.687	0.649	0.539	0.714	-0.372	-0.334	-0.5	-0.459	-0.24	0.69	0.958	0.312	0.149	0	-0.169	-0.212	-0.182	-0.199
14111	P80188	H9H4W6	tr|H9H4W6|H9H4W6_MACMU	LCN2	0.144	0.392	0.2	-0.138	-0.1	-0.0869	0.218	1.39	-0.336	0.108	0	0.891	-0.552	-0.286	0.0772	-0.0338	-0.472	0.509	-0.224
16122	P80297	F7GC79	tr|F7GC79|F7GC79_MACMU	MT1X	-0.47	1.11	0.626	0.675	0	0.332	-0.609	-0.132	-1	-0.253	1.01	-0.0614	0.00406	0.131	0.0104	-0.285	-0.386	0.161	-0.739
8676	P80303	F6TKU8	tr|F6TKU8|F6TKU8_MACMU	NUCB2	-0.114	-0.22	-0.104	-0.215	-0.151	-0.186	0.121	0.061	0.123	-0.16	-0.0389	-0.199	0.0264	0	0.0296	0.0537	0.585	0.1	0.272
8330	P80370	F7GDI5	tr|F7GDI5|F7GDI5_MACMU	DLK1	-0.14	0.00141	0.00531	-0.314	-0.0262	-0.401	0.289	-0.103	0	-0.127	0.075	-0.0843	-0.146	0.0332	-0.0524	0.367	0.0137	0.457	0.027
13181	P80723	F7HN33	tr|F7HN33|F7HN33_MACMU	BASP1	0.552	0.692	0.164	0.0555	0.349	-0.712	-0.744	-0.739	-0.571	-0.511	0.121	0.617	0	-0.102	-0.37	-0.415	0.0461	0.196	-0.391
15952	P81172	F6WA25	tr|F6WA25|F6WA25_MACMU	HAMP	0.0245	0.0903	-0.0797	0	-0.27	0.119	-0.189	0.262	0.213	0.0369	0.277	0.163	-0.0188	-0.156	0.583	-0.262	-0.207	-0.342	-0.38
15761	P81605	F7H8A9	tr|F7H8A9|F7H8A9_MACMU	DCD	-0.743	-0.565	-0.386	-0.487	-0.253	0.715	0.509	0.0859	-0.0787	-0.573	-0.566	0.245	1.1	0.175	0.0299	0.546	-0.347	0.107	0
408	P82987	F7GFI3	tr|F7GFI3|F7GFI3_MACMU	ADAMTSL3	NA	NA	NA	NA	NA	NA	NA	NA	-0.559	-0.625	-0.0804	-0.617	-0.395	0	0.0219	0.299	0.206	0.151	0.0773
14090	P84077	F7H235	tr|F7H235|F7H235_MACMU	ARF1	0.517	0.352	0.361	0.17	0.048	-0.0371	-0.0279	0.227	-0.348	0.0878	0.0494	-0.196	0.268	-0.00861	0	-0.288	-0.133	-0.297	-0.195
13723	P84095	F6ZFI9	tr|F6ZFI9|F6ZFI9_MACMU	RHOG	NA	NA	NA	NA	NA	NA	NA	NA	0.0511	-0.546	0.294	-0.245	0.026	0	-0.225	NA	NA	NA	NA
14369	P84103	F7BSI5	tr|F7BSI5|F7BSI5_MACMU	SRSF3	NA	NA	NA	NA	NA	NA	NA	NA	0.0101	0.677	0.0926	-0.426	0	0.859	0.227	-0.0774	-0.169	-0.25	-0.61
4229	P98095	F6UHI1	tr|F6UHI1|F6UHI1_MACMU	FBLN2	-0.237	0.175	-0.0806	-0.476	0.285	0.0271	-0.142	0.0221	0	-0.38	0.122	-0.234	0.114	-0.104	-0.119	0.0176	0.189	0.584	-0.199
5330	P98153	F7GNN6	tr|F7GNN6|F7GNN6_MACMU	DGCR2	0.167	-0.27	-0.372	-0.349	-0.0309	-0.166	-0.0805	-0.325	0.326	-0.373	0	0.0828	0.12	0.255	-0.407	0.0981	0.206	0.604	0.187
44	P98160	F7FSZ9	tr|F7FSZ9|F7FSZ9_MACMU	HSPG2	0.151	0.0268	-0.09	-0.135	0.101	-0.18	-0.0222	-0.0507	0.0873	0	-0.0854	0.0518	-0.173	-0.132	0.087	0.0455	0.234	0.0416	-0.0583
9765	P98172	F7H0J3	tr|F7H0J3|F7H0J3_MACMU	EFNB1	0.183	0.199	0.219	0.209	0.125	-0.438	-0.342	-0.509	0.0814	-0.162	-0.0118	-0.082	-0.226	0.14	-0.215	0	0.00475	0.398	-0.0391
13079	P98173	F7GMH0	tr|F7GMH0|F7GMH0_MACMU	FAM3A	NA	NA	NA	NA	NA	NA	NA	NA	0.0566	0.0202	-0.251	-0.354	-0.119	0.00373	-0.129	-0.147	0	0.0667	0.123
15623	P99999	P00002	sp|P00002|CYC_MACMU	CYCS	0.515	-0.00209	0.219	0.491	0.854	-0.352	-0.626	-0.835	-0.315	-0.123	0.717	0	-0.298	0.181	-0.416	0.487	0.128	0.0783	-0.156
11689	Q00169	F7BU55	tr|F7BU55|F7BU55_MACMU	PITPNA	0.185	-0.0764	-0.108	-0.000677	-0.0241	0.0461	0.0575	0.0335	NA	NA	NA	NA	NA	NA	NA	-0.569	0.000677	-0.37	0.0651
10331	Q00577	F6T2C6	tr|F6T2C6|F6T2C6_MACMU	PURA	0.108	0.785	0.515	0.503	-0.0308	0.337	-0.243	-0.309	0.318	0.391	-0.309	-0.52	0.736	-0.332	0.388	0	-0.321	-0.114	-0.49
463	Q00610	F7B8E8	tr|F7B8E8|F7B8E8_MACMU	CLTC	0.0713	0.365	0.25	0.434	0.0227	0.0679	0	-0.109	-0.074	0.327	-0.0138	-0.0406	0.0263	-0.0705	0.167	-0.095	-0.17	-0.278	-0.226
12989	Q00688	F7G0S7	tr|F7G0S7|F7G0S7_MACMU	FKBP3	NA	NA	NA	NA	NA	NA	NA	NA	NA	NA	NA	NA	NA	NA	NA	0.215	-0.049	-0.138	0.049
1220	Q00722	F7D8C0	tr|F7D8C0|F7D8C0_MACMU	PLCB2	NA	NA	NA	NA	NA	NA	NA	NA	NA	NA	NA	NA	NA	NA	NA	-0.183	0.183	0.299	-0.334
9677	Q00796	F6XVN0	tr|F6XVN0|F6XVN0_MACMU	SORD	NA	NA	NA	NA	NA	NA	NA	NA	-0.285	0.055	0.442	-0.247	0.532	-0.0886	0.305	-0.0352	0.0923	-0.28	0
2910	Q00839	F7GWA9	tr|F7GWA9|F7GWA9_MACMU	HNRNPU	0.359	0.845	0.991	0.449	1.06	-0.607	-0.488	-0.0471	-0.947	0	0.6	1.3	0.0259	0.196	-0.287	-0.508	-0.813	-0.562	-0.608
5710	Q00973	F6R9K4	tr|F6R9K4|F6R9K4_MACMU	B4GALNT1	0.00888	-0.0883	-0.16	-0.0459	-0.079	-0.00191	0.131	0.0483	0.14	-0.0882	-0.388	0.195	0.0706	0.199	-0.0173	-0.179	0.0716	0.147	0
169	Q01082	F7FS47	tr|F7FS47|F7FS47_MACMU	SPTBN1	0.473	0.553	0.47	0.418	0.587	-0.0025	-0.378	-0.405	-0.533	-0.164	0.664	0.643	0.263	0.313	0	-0.374	-0.234	-0.106	-0.356
13174	Q01130	F6XCW5	tr|F6XCW5|F6XCW5_MACMU	SRSF2	0.508	0.293	0.589	0.296	0.623	-0.452	-0.412	-0.557	-0.101	0	0.199	0.357	0.0907	0.386	-0.277	-0.413	-0.528	-0.434	-0.13
13525	Q01151	F6WX37	tr|F6WX37|F6WX37_MACMU	CD83	-0.239	-0.131	-0.218	-0.0607	-0.106	0.353	-0.143	0	0.138	-0.244	0.144	-0.00443	0.221	0.206	-0.219	0.317	0.461	0.275	0.112
2242	Q01433	F6VKF9	tr|F6VKF9|F6VKF9_MACMU	AMPD2	NA	NA	NA	NA	NA	NA	NA	NA	NA	NA	NA	NA	NA	NA	NA	0.0216	-0.0272	-0.0216	0.126
8779	Q01459	F6QZ27	tr|F6QZ27|F6QZ27_MACMU	CTBS	0.107	-0.171	-0.132	-0.0613	-0.145	0.155	-0.0291	-0.128	0.266	0.112	0.31	-0.485	-0.0981	-0.239	0	0.256	0.233	0.0942	0.219
15089	Q01469	F6YIY5	tr|F6YIY5|F6YIY5_MACMU	FABP5	0.294	0.369	0.252	0.25	-0.224	0	0.0448	-0.0925	-0.415	0.189	0.0632	-0.252	0.123	-0.0548	-0.0657	0.143	-0.347	-0.426	-0.392
43	Q01484	F7H4E0	tr|F7H4E0|F7H4E0_MACMU	ANK2	0.102	0.455	0.0863	-0.0863	0.364	-0.575	-1.06	-0.814	NA	NA	NA	NA	NA	NA	NA	NA	NA	NA	NA
6988	Q01518	F7HMC9	tr|F7HMC9|F7HMC9_MACMU	CAP1	-0.0227	0.0524	0.101	0.523	0.173	0.228	0.113	0.854	-0.165	0.0688	-0.0441	-0.351	0	0.0404	-0.158	-0.256	-0.398	-0.325	-0.192
5686	Q01638	F7H8I2	tr|F7H8I2|F7H8I2_MACMU	IL1RL1	NA	NA	NA	NA	NA	NA	NA	NA	-0.127	-0.0524	0.326	0.366	-0.272	-0.254	0.128	0.479	0	0.666	-0.5
3272	Q01813	F7CD97	tr|F7CD97|F7CD97_MACMU	PFKP	0.105	-0.182	-0.0475	0.0758	0.0143	0	0.412	0.192	-0.222	0.0963	-0.171	-0.473	-0.0338	-0.356	0.414	0.0949	-0.0649	0.0445	-0.0334
1821	Q01973	F6RUP2	tr|F6RUP2|F6RUP2_MACMU	ROR1	NA	NA	NA	NA	NA	NA	NA	NA	NA	NA	NA	NA	NA	NA	NA	-0.153	0.167	-0.24	0.153
13567	Q01995	F6WXC6	tr|F6WXC6|F6WXC6_MACMU	TAGLN	1.09	0.769	0.455	0.66	-0.167	-0.565	-0.182	-0.329	0.042	0.0169	-0.0432	0.737	-0.0137	-0.245	0.281	0.774	-0.0997	-0.0957	0
1496	Q02218	F7H508	tr|F7H508|F7H508_MACMU	OGDH	0.974	1.4	0.33	0.754	0.367	-0.395	-0.639	-1.24	NA	NA	NA	NA	NA	NA	NA	-0.177	-0.473	0.177	-0.573
1485	Q02246	F6ZIK5	tr|F6ZIK5|F6ZIK5_MACMU	CNTN2	-0.0491	0.0682	0.0678	-0.282	0.0655	-0.147	-0.107	-0.459	0.0102	-0.258	0.0851	-0.142	-0.126	0.201	0.0465	0.313	-0.00768	0	0.591
5886	Q02252	F7E2B9	tr|F7E2B9|F7E2B9_MACMU	ALDH6A1	NA	NA	NA	NA	NA	NA	NA	NA	NA	NA	NA	NA	NA	NA	NA	0.375	-0.295	0.295	-0.973
7855	Q02383	Q95196	sp|Q95196|SEMG2_MACMU	SEMG2	0	0.604	-0.624	0.987	-0.451	-0.145	1.89	0.28	0.078	-0.615	3.86	-0.763	0.39	-0.179	-0.131	NA	NA	NA	NA
91	Q02388	F7GSG4	tr|F7GSG4|F7GSG4_MACMU	COL7A1	0.346	0.294	-0.262	-0.0601	0.172	-0.477	0.0601	-0.434	NA	NA	NA	NA	NA	NA	NA	NA	NA	NA	NA
3457	Q02410	F6VZI8	tr|F6VZI8|F6VZI8_MACMU	APBA1	0.195	-0.209	0.0138	-0.0894	-0.0132	0.0683	0.0132	-0.319	NA	NA	NA	NA	NA	NA	NA	NA	NA	NA	NA
2231	Q02487	F7HEK0	tr|F7HEK0|F7HEK0_MACMU	DSC2	-0.306	-0.307	-0.0293	-0.177	0	0.000616	0.344	0.153	-0.164	0.102	-0.11	-0.254	-0.121	0.131	-0.00902	0.0703	0.439	0.099	0.463
8478	Q02750	F7C389	tr|F7C389|F7C389_MACMU	MAP2K1	0.806	0.621	0.465	0.253	0.556	-0.6	-0.688	-0.975	-0.495	-0.34	0.48	0.387	0	-0.237	-0.139	NA	NA	NA	NA
7229	Q02790	F6T3D0	tr|F6T3D0|F6T3D0_MACMU	FKBP4	0.749	0.86	0.413	-0.0162	0.474	-0.175	-0.25	-0.701	-0.225	0.376	0.0592	0	0.287	0.0672	0.32	-0.11	-0.43	-0.248	-0.0672
9739	Q02818	F6ZG74	tr|F6ZG74|F6ZG74_MACMU	NUCB1	0.099	-0.333	-0.0683	-0.131	-0.236	0.19	-0.253	-0.336	0.0351	-0.199	0.0634	-0.414	0.191	0	-0.291	0.217	0.38	0.292	0.0126
11533	Q02878	F6WKH0	tr|F6WKH0|F6WKH0_MACMU	RPL6	-0.669	-0.501	0.12	-0.537	0.193	0.214	0.118	0.337	NA	NA	NA	NA	NA	NA	NA	-0.434	0.0413	-0.482	-0.0413
509	Q02952	F7FKM0	tr|F7FKM0|F7FKM0_MACMU	AKAP12	0.182	0.55	0.031	0.293	0.158	-0.236	-0.309	-0.388	-0.245	-0.349	0.518	0.106	0	-0.0462	-0.167	-0.165	0.0611	0.103	-0.103
13126	Q03013	F6WWX7	tr|F6WWX7|F6WWX7_MACMU	GSTM4	0.435	0.339	0.0676	0.709	-0.0151	0	0.168	-0.177	-0.147	0.21	0.225	-0.0749	0.304	-0.0421	-0.0657	0.78	-0.0884	-0.0131	-0.258
2440	Q03167	F7GLX3	tr|F7GLX3|F7GLX3_MACMU	TGFBR3	-0.113	-0.165	-0.122	-0.0943	-0.0167	0.363	-0.0636	0.129	0.29	-0.0669	-0.0733	-0.138	0.115	0.434	0	0.139	0.391	0.593	0.442
6630	Q03252	F6R7X5	tr|F6R7X5|F6R7X5_MACMU	LMNB2	0.512	0.622	0.856	0	0.882	-0.195	-0.577	-0.429	-0.237	-0.257	0.011	0.661	0.38	-0.12	-0.071	-0.365	0.269	-0.253	0.125
15332	Q03403	F7EKA5	tr|F7EKA5|F7EKA5_MACMU	TFF2	NA	NA	NA	NA	NA	NA	NA	NA	0.234	0.817	0	-0.424	-0.168	0.164	-0.0548	NA	NA	NA	NA
10979	Q03405	F6Q0C7	tr|F6Q0C7|F6Q0C7_MACMU	PLAUR	-0.586	0.223	-0.0299	-0.258	-0.372	0.0329	-0.395	0.156	NA	NA	NA	NA	NA	NA	NA	0.0935	-0.0613	0.464	0.0299
8937	Q03426	F7HGV8	tr|F7HGV8|F7HGV8_MACMU	MVK	NA	NA	NA	NA	NA	NA	NA	NA	0.338	0.271	-0.389	-0.358	0.229	-0.00888	0	NA	NA	NA	NA
651	Q03468	F7EMA2	tr|F7EMA2|F7EMA2_MACMU	ERCC6	-0.0135	0.635	0.0168	0.0135	0.266	-0.515	-0.679	-0.694	NA	NA	NA	NA	NA	NA	NA	NA	NA	NA	NA
12970	Q03591	F6XAC5	tr|F6XAC5|F6XAC5_MACMU	CFHR1	-0.0865	-0.255	-0.0316	0.373	-0.113	0.279	0.398	1.16	-0.0533	0.505	0.344	-0.105	0.191	0.141	0.427	-0.0696	-0.129	0	-0.113
4537	Q03936	F6Q174	tr|F6Q174|F6Q174_MACMU	ZNF92	NA	NA	NA	NA	NA	NA	NA	NA	0.469	0	-0.0105	0.41	-0.0459	-0.12	0.199	NA	NA	NA	NA
4993	Q03989	F6X0Q2	tr|F6X0Q2|F6X0Q2_MACMU	ARID5A	-0.115	-0.217	-0.0438	0.0438	0.122	-0.139	0.215	0.359	NA	NA	NA	NA	NA	NA	NA	NA	NA	NA	NA
11770	Q04323	F6W1J6	tr|F6W1J6|F6W1J6_MACMU	UBXN1	0.0152	0.303	0.0268	-0.0404	0.181	0.0503	0.103	-0.0379	-1.32	-0.516	1.15	0.0219	0	0.083	-0.135	-0.327	-0.862	-0.321	-0.328
3423	Q04446	F7C130	tr|F7C130|F7C130_MACMU	GBE1	-0.307	-0.262	-0.0552	-0.171	0.0259	-0.151	0.32	0.15	0.00538	0.199	-0.0813	0.0322	-0.43	-0.214	0.0922	0.096	0.034	-0.026	0
3129	Q04609	F7FA05	tr|F7FA05|F7FA05_MACMU	FOLH1	0.162	-0.597	0.2	0.0536	0.194	-0.514	-0.0656	-0.283	0.371	-0.41	-0.0672	0.106	0	-0.195	-0.4	-0.455	0.0843	0.201	0.0483
8028	Q04695	F6YK97	tr|F6YK97|F6YK97_MACMU	KRT17	NA	NA	NA	NA	NA	NA	NA	NA	0.169	-0.263	-0.837	0	-0.0473	-0.156	0.0982	0.293	1.08	0.224	-0.225
111	Q04721	F7H1D5	tr|F7H1D5|F7H1D5_MACMU	NOTCH2	-0.186	-0.354	0.136	-0.345	-0.397	0.0175	0.191	0	0.332	-0.25	-0.278	0.122	-0.0882	0.024	-0.25	-0.035	0.0662	0.419	0.132
4584	Q04756	F7DH19	tr|F7DH19|F7DH19_MACMU	HGFAC	-0.254	-0.251	0.217	-0.00844	0.143	-0.14	0.517	0.727	0.278	0.326	-0.277	0	-0.0567	-0.275	0.744	-0.157	0.359	-0.41	0.0939
13965	Q04760	F7GRZ9	tr|F7GRZ9|F7GRZ9_MACMU	GLO1	0.151	0.412	0.201	0.53	0.444	-0.189	-0.232	-0.305	-0.5	0.299	0.727	-0.649	0.0461	0.00943	-0.0208	0	-0.513	-0.613	-0.0873
5785	Q04771	F7A9J8	tr|F7A9J8|F7A9J8_MACMU	ACVR1	NA	NA	NA	NA	NA	NA	NA	NA	NA	NA	NA	NA	NA	NA	NA	-0.0077	0.0077	0.157	-0.171
14896	Q04837	F6X3C0	tr|F6X3C0|F6X3C0_MACMU	SSBP1	0.748	0.112	0.0505	0.502	0.101	-0.0854	-0.438	-0.465	-0.517	0	0.737	-0.0395	-0.0262	-0.248	0.171	0.436	-0.202	-0.474	0.227
12589	Q04917	F6RIX6	tr|F6RIX6|F6RIX6_MACMU	YWHAH	1.22	1.49	1.29	1.32	1.3	-0.823	-0.74	-0.938	-0.889	-0.229	1.51	1.1	0.14	0.285	0	-0.37	-0.829	-0.508	-0.732
13834	Q05066	Q9BG90	sp|Q9BG90|SRY_MACMU	SRY	NA	NA	NA	NA	NA	NA	NA	NA	NA	NA	NA	NA	NA	NA	NA	-0.357	0.58	-0.198	0.198
15522	Q05315	F6XPQ9	tr|F6XPQ9|F6XPQ9_MACMU	CLC	-0.268	-0.229	1.06	-0.342	1.16	0.298	0.836	0.763	NA	NA	NA	NA	NA	NA	NA	-0.513	0.229	-0.52	-0.321
1905	Q05469	F7EWI0	tr|F7EWI0|F7EWI0_MACMU	LIPE	NA	NA	NA	NA	NA	NA	NA	NA	NA	NA	NA	NA	NA	NA	NA	0.633	-0.592	0.207	-0.207
5019	Q05D60	F7H3Y1	tr|F7H3Y1|F7H3Y1_MACMU	DEUP1	-0.4	-0.0243	0.07	-0.0506	0.00275	-0.00275	0.131	0.0311	NA	NA	NA	NA	NA	NA	NA	NA	NA	NA	NA
2328	Q06033	F7GAT4	tr|F7GAT4|F7GAT4_MACMU	ITIH3	-0.107	-0.0819	-0.0433	0.309	0.174	-0.169	0.961	0.756	0.561	0.849	-0.373	0.586	0	-0.143	0.794	-0.104	-0.494	-0.343	0.531
4624	Q06124	F6ZJD8	tr|F6ZJD8|F6ZJD8_MACMU	PTPN11	-0.0403	-0.0138	-0.0362	-0.029	0.126	0.0259	0.0138	0.174	NA	NA	NA	NA	NA	NA	NA	NA	NA	NA	NA
2550	Q06418	F6T717	tr|F6T717|F6T717_MACMU	TYRO3	0.263	0.131	-0.0763	-0.128	0	-0.0502	0.133	-0.0556	0.16	-0.115	-0.229	0.302	-0.105	0.219	-0.159	-0.0967	0.182	0.407	0.129
3249	Q06481	F7FJ90	tr|F7FJ90|F7FJ90_MACMU	APLP2	0.239	0.0778	-0.292	-0.118	0	-0.159	-0.0789	-0.341	0.259	-0.115	-0.373	-0.0411	0.108	0.376	-0.351	0.149	0.333	0.572	0.0405
8650	Q06828	F7FA56	tr|F7FA56|F7FA56_MACMU	FMOD	-0.036	-0.0621	-0.179	-0.134	0.0372	-0.193	0.0142	-0.212	0.101	0.0197	-0.114	0.14	0.0914	-0.122	0	0.16	0.0465	-0.274	0.112
13519	Q06830	F7HLH7	tr|F7HLH7|F7HLH7_MACMU	PRDX1	0.223	0.0444	0.0025	1.13	-0.518	-0.145	-0.65	0.398	-0.685	0.278	-0.0233	-0.661	0.115	0.439	0.196	-0.512	0	-0.701	-0.353
11892	Q07021	F7HPK9	tr|F7HPK9|F7HPK9_MACMU	C1QBP	0.0689	-0.838	0.449	0.364	0.614	-9.09e-05	-0.16	-0.553	-0.068	-0.869	0.444	0	0.333	-0.267	0.692	-0.0376	-0.376	0.102	1.09
1862	Q07075	F7GTW9	tr|F7GTW9|F7GTW9_MACMU	ENPEP	NA	NA	NA	NA	NA	NA	NA	NA	0.0348	0	-0.279	-0.138	-0.438	-0.212	-0.0481	0.107	0.417	0.0399	0.711
13924	Q07507	F7H1N1	tr|F7H1N1|F7H1N1_MACMU	DPT	-0.174	-0.101	0.0404	-0.248	0.0431	-0.54	0.139	-0.601	NA	NA	NA	NA	NA	NA	NA	0.165	0.256	0.0353	-0.0353
16130	Q07654	F7EKB1	tr|F7EKB1|F7EKB1_MACMU	TFF3	-0.259	-0.932	-0.202	0.0619	-0.0644	0.105	0.811	-0.193	-0.0608	-0.0274	0.135	0	-0.515	0.195	0.00947	0.274	0.64	-0.187	0.589
53	Q07954	F7DEG1	tr|F7DEG1|F7DEG1_MACMU	LRP1	-0.00753	0.0103	-0.0716	-0.0412	-0.0379	0	-0.0115	0.0124	0.0731	-0.189	0.192	-0.00222	-0.0302	0.0613	-0.0847	0.223	0.173	0.385	0.138
12201	Q07955	F6R520	tr|F6R520|F6R520_MACMU	SRSF1	-0.122	0.318	-0.139	0.199	0.0152	0.105	0.327	0.126	0	0.0234	-0.255	-0.179	0.00516	0.354	-0.0508	-0.548	-0.427	-0.236	-0.292
7458	Q07960	F7CI83	tr|F7CI83|F7CI83_MACMU	ARHGAP1	-0.643	0.58	-0.15	0.536	0.0399	0.231	-0.251	0.426	-0.464	0.171	-0.51	-0.00243	-0.0843	0.651	-0.165	-0.403	0	0.127	0.182
6740	Q08170	F7DYE3	tr|F7DYE3|F7DYE3_MACMU	SRSF4	NA	NA	NA	NA	NA	NA	NA	NA	NA	NA	NA	NA	NA	NA	NA	0.248	-0.168	-0.0601	0.0601
5995	Q08209	F6Q932	tr|F6Q932|F6Q932_MACMU	PPP3CA	0.314	0.122	0.609	0.874	0.703	-0.303	0	0.0201	-0.437	0.0292	1.21	1.18	-0.0474	-0.192	-0.189	-0.445	-0.281	-0.204	-0.502
883	Q08211	F6W5Y4	tr|F6W5Y4|F6W5Y4_MACMU	DHX9	NA	NA	NA	NA	NA	NA	NA	NA	-0.432	-0.0347	0.23	-0.114	0.575	-0.0592	0.453	-0.345	0.208	0.162	0
4109	Q08357	F6WTV4	tr|F6WTV4|F6WTV4_MACMU	SLC20A2	NA	NA	NA	NA	NA	NA	NA	NA	NA	NA	NA	NA	NA	NA	NA	-0.0438	-0.242	0.0438	0.0933
5069	Q08380	F7CNK6	tr|F7CNK6|F7CNK6_MACMU	LGALS3BP	-0.0525	0.124	0.0363	0.0308	-0.0604	0.271	-0.0737	-0.154	-0.0123	0.143	0.322	0.0351	0.196	-0.169	-0.000907	0.162	0	-0.19	-0.462
4755	Q08397	F6Q5T0	tr|F6Q5T0|F6Q5T0_MACMU	LOXL1	-0.199	-0.311	-0.152	-0.254	-0.117	0.264	0.236	0.286	0.123	0.0968	-0.213	0.143	-0.0885	0.0769	0.157	-0.141	0.0621	-0.13	0
3593	Q08426	F7GFA8	tr|F7GFA8|F7GFA8_MACMU	EHHADH	NA	NA	NA	NA	NA	NA	NA	NA	NA	NA	NA	NA	NA	NA	NA	0.0603	-0.0603	0.115	-0.0827
6878	Q08629	F7B8Z2	tr|F7B8Z2|F7B8Z2_MACMU	SPOCK1	0.0946	-0.513	-0.463	0.288	-0.0828	0.153	0.00432	-0.164	0	-0.181	-0.371	-0.266	-0.0176	0.4	0.111	0.255	0.149	0.683	-0.0845
9105	Q08752	F7EYP8	tr|F7EYP8|F7EYP8_MACMU	PPID	0.46	0.592	0.132	0.801	-0.257	0.0428	-0.216	-0.526	-0.555	-0.0913	0.258	-0.802	0.206	0	0.0604	-0.0775	0.0435	-0.0587	-0.111
3489	Q08945	F7E0V3	tr|F7E0V3|F7E0V3_MACMU	SSRP1	NA	NA	NA	NA	NA	NA	NA	NA	0	0.0327	-1.26	0.209	-1.69	-0.967	0.607	NA	NA	NA	NA
5329	Q09327	F7GFR4	tr|F7GFR4|F7GFR4_MACMU	MGAT3	-0.543	-0.262	-0.0663	-0.118	0.0711	0.0663	0.223	0.131	NA	NA	NA	NA	NA	NA	NA	-0.397	0.349	-0.319	0.244
3632	Q09328	F7CU31	tr|F7CU31|F7CU31_MACMU	MGAT5	-0.0537	-0.186	-0.181	-0.0734	-0.0614	0.0753	-0.00191	0.149	0	-0.168	-0.559	0.23	-0.133	0.55	0.282	0.144	0.0102	0.319	0.0781
37	Q09666	F6S2X3	tr|F6S2X3|F6S2X3_MACMU	AHNAK	0.288	-0.135	0.284	-0.399	0.000987	0.0515	0.556	0.358	-0.00582	0.111	-0.0766	0.0118	0.349	-0.0217	0	-0.156	-0.155	-0.291	-0.106
4804	Q10471	F7B3H7	tr|F7B3H7|F7B3H7_MACMU	GALNT2	0.0681	-0.366	-0.112	-0.0782	0	0.215	-0.00917	-0.135	0.000657	-0.111	-0.0145	-0.0416	0.0449	0.135	-0.232	0.141	0.79	0.268	0.0854
4943	Q10472	F6YR98	tr|F6YR98|F6YR98_MACMU	GALNT1	0.267	-0.242	-0.2	-0.321	0.0983	-0.187	-0.0687	-0.351	0.23	0.0594	-0.173	0	0.0581	0.161	-0.155	-0.0867	0.0686	0.104	0.107
12482	Q10588	F6QEZ3	tr|F6QEZ3|F6QEZ3_MACMU	BST1	-0.311	-0.0789	-0.153	-0.137	-0.228	0.19	0	0.0612	-0.0392	0.332	0.092	-0.178	0.027	0.063	-0.315	0.194	0.0543	-0.0113	0.068
9404	Q11128	F7HPJ4	tr|F7HPJ4|F7HPJ4_MACMU	FUT5	NA	NA	NA	NA	NA	NA	NA	NA	NA	NA	NA	NA	NA	NA	NA	0.0392	-0.0392	0.0443	-0.089
9530	Q12765	F7CYS6	tr|F7CYS6|F7CYS6_MACMU	SCRN1	0.232	0.423	0.216	0.134	0.124	-0.38	-0.0731	-0.051	-0.552	-0.137	0.519	0.125	0.0136	-0.281	0.0942	0	-0.364	-0.278	-0.234
3438	Q12797	F7F6G5	tr|F7F6G5|F7F6G5_MACMU	ASPH	0	-0.173	-0.275	-0.432	-0.0384	0.0185	0.0598	-0.0832	0.097	-0.225	-0.293	-0.246	0.266	0.183	-0.418	0.233	0.136	0.204	0.0407
6952	Q12805	F7BQM7	tr|F7BQM7|F7BQM7_MACMU	EFEMP1	0.187	-0.0926	-0.276	-0.401	-0.245	0.0535	-0.205	-0.149	0	-0.0802	-0.245	-0.338	0.413	0.163	0.0578	0.178	0.234	0.492	0.0117
1983	Q12840	F6UP80	tr|F6UP80|F6UP80_MACMU	KIF5A	NA	NA	NA	NA	NA	NA	NA	NA	0.342	0.316	-0.0869	-0.375	0	-0.105	0.142	-0.0406	0.571	0.214	-0.0633
10283	Q12841	F7H1Q5	tr|F7H1Q5|F7H1Q5_MACMU	FSTL1	0.144	-0.231	-0.0187	-0.0736	0	0.433	-0.066	-0.0176	-0.144	0.0731	0.126	-0.0204	0.183	-0.00098	-0.23	0.3	0.307	0.354	0.24
1907	Q12866	F6T7N0	tr|F6T7N0|F6T7N0_MACMU	MERTK	-0.0648	0	-0.0403	-0.104	0.00486	-0.0415	0.0876	-0.122	-0.197	-0.0308	0.126	0.0549	0.0843	0.00699	-0.0651	0.0656	-0.107	0.335	0.155
2828	Q12884	F7EF58	tr|F7EF58|F7EF58_MACMU	FAP	NA	NA	NA	NA	NA	NA	NA	NA	NA	NA	NA	NA	NA	NA	NA	0.174	0.662	-0.174	-0.307
8629	Q12905	F7HGD2	tr|F7HGD2|F7HGD2_MACMU	ILF2	-0.0791	0.097	0.352	0.041	0.395	0	0.0491	0.0782	-0.142	0.42	-0.0143	0.747	-0.247	-0.0991	0.14	-0.542	-0.388	-0.15	-0.34
11944	Q12907	F7FQ55	tr|F7FQ55|F7FQ55_MACMU	LMAN2	0.33	0.278	-0.00409	-0.12	0	-0.176	0.13	-0.238	0.116	-0.0157	-0.0978	0.287	-0.156	0.0883	-0.177	-0.127	0.0874	0.373	0.151
4545	Q12931	F7EHQ6	tr|F7EHQ6|F7EHQ6_MACMU	TRAP1	0.631	1.2	0.813	0.592	0.809	-0.4	-1.1	-0.688	-1.18	0.136	0.877	-0.0845	0.172	0	-0.0629	0.152	-0.77	-0.242	-0.985
2303	Q12959	F6VPH0	tr|F6VPH0|F6VPH0_MACMU	DLG1	0.00311	0.0657	0.249	0.175	-0.00311	-0.8	-0.779	-0.429	NA	NA	NA	NA	NA	NA	NA	NA	NA	NA	NA
13313	Q12999	F7HCX5	tr|F7HCX5|F7HCX5_MACMU	TSPAN31	NA	NA	NA	NA	NA	NA	NA	NA	-0.329	-0.238	0	-0.176	0.724	0.18	0.389	NA	NA	NA	NA
12744	Q13011	F6TNT1	tr|F6TNT1|F6TNT1_MACMU	ECH1	NA	NA	NA	NA	NA	NA	NA	NA	NA	NA	NA	NA	NA	NA	NA	0.746	-0.116	0.116	-0.315
610	Q13018	F6PSM7	tr|F6PSM7|F6PSM7_MACMU	PLA2R1	-0.296	0	-0.211	-0.274	-0.465	0.204	-0.15	0.154	0.206	-0.277	-0.0918	-0.286	0.151	0.0159	-0.35	0.103	0.64	0.0342	0.323
7695	Q13093	F6SQA6	tr|F6SQA6|F6SQA6_MACMU	PLA2G7	0.129	0.0106	-0.2	0.218	-0.133	-0.341	-0.311	-0.326	0.203	0.00321	-0.313	0.216	-0.454	-0.0622	0	0.254	-0.105	0.325	0.0681
11930	Q13145	F6ZWJ7	tr|F6ZWJ7|F6ZWJ7_MACMU	BAMBI	-0.0514	-0.209	0.109	-0.259	-0.244	0.0514	0.277	0.306	NA	NA	NA	NA	NA	NA	NA	NA	NA	NA	NA
13959	Q13158	F7BFA0	tr|F7BFA0|F7BFA0_MACMU	FADD	NA	NA	NA	NA	NA	NA	NA	NA	NA	NA	NA	NA	NA	NA	NA	0.015	-0.679	-0.015	0.0559
5891	Q13177	F7GWI2	tr|F7GWI2|F7GWI2_MACMU	PAK2	0.472	0.604	0.309	0.108	0.281	-0.454	-0.121	-0.0902	-0.536	0.279	-0.00318	0.461	0	0.087	0.0588	-0.257	-0.177	-0.305	-0.269
2291	Q13200	F6R1X3	tr|F6R1X3|F6R1X3_MACMU	PSMD2	NA	NA	NA	NA	NA	NA	NA	NA	-0.334	0.278	0.00855	-0.33	0.266	0.465	0.239	0	-0.451	-0.413	-0.0307
3480	Q13206	F7BIN5	tr|F7BIN5|F7BIN5_MACMU	DDX10	NA	NA	NA	NA	NA	NA	NA	NA	0	-0.754	-0.575	-0.232	0.11	0.35	-0.211	-0.945	0.493	0.474	0.448
3328	Q13214	F7GI41	tr|F7GI41|F7GI41_MACMU	SEMA3B	0	0.00203	-0.0488	-0.12	0.0444	0.376	-0.124	-0.0371	0.328	-0.0237	0.145	-0.218	0.344	-0.154	-0.0453	0.231	0.0898	-0.0159	0.219
6226	Q13217	F6VD19	tr|F6VD19|F6VD19_MACMU	DNAJC3	0	-0.278	-0.248	-0.47	-0.303	0.349	-0.096	0.0509	0.0977	-0.105	-0.441	-0.18	0.529	0.161	0.181	-0.0468	0.165	0.165	0.102
1063	Q13255	F7GU00	tr|F7GU00|F7GU00_MACMU	GRM1	-0.115	-0.0619	0.333	-0.6	-0.0853	0.018	0.27	0	0.234	0.0291	-0.212	-0.268	0.248	0.336	-0.0361	NA	NA	NA	NA
11447	Q13287	F7EUB1	tr|F7EUB1|F7EUB1_MACMU	NMI	-0.132	0.152	-0.217	0.644	-0.27	0.132	-0.621	0.175	NA	NA	NA	NA	NA	NA	NA	NA	NA	NA	NA
1418	Q13308	F7G3Z5	tr|F7G3Z5|F7G3Z5_MACMU	PTK7	-0.0991	0.00947	-0.0551	-0.0652	0.0032	0.0952	-0.00237	0.177	0	-0.131	-0.174	0.156	-0.22	0.0776	-0.355	-0.134	0.332	0.707	0.374
5831	Q13349	F7CSW8	tr|F7CSW8|F7CSW8_MACMU	ITGAD	NA	NA	NA	NA	NA	NA	NA	NA	0.0315	0.206	0	-0.492	-0.506	-0.112	0.298	NA	NA	NA	NA
4186	Q13409	F7F396	tr|F7F396|F7F396_MACMU	DYNC1I2	-0.096	0.0555	-0.385	-0.0349	0.0349	0.0928	0.131	0.229	NA	NA	NA	NA	NA	NA	NA	-0.923	-0.132	-0.155	0.184
5446	Q13416	F7BAH4	tr|F7BAH4|F7BAH4_MACMU	ORC2	0.342	0.326	-0.28	-0.204	0.246	0.155	-0.155	-0.53	NA	NA	NA	NA	NA	NA	NA	NA	NA	NA	NA
5443	Q13421	F6Q1U7	tr|F6Q1U7|F6Q1U7_MACMU	MSLN	0.0349	-0.239	-0.101	-0.375	-0.332	-0.046	0.366	0.0966	-0.232	-0.138	0.254	-0.18	0	0.345	0.068	0.279	-0.287	0.372	0.61
5612	Q13422	F6YC72	tr|F6YC72|F6YC72_MACMU	IKZF1	-0.771	-0.865	0.15	-0.536	0.293	-0.261	0	0.628	0.152	0.00786	-0.544	0.278	-0.164	-0.294	0.231	NA	NA	NA	NA
2572	Q13435	F7GWY2	tr|F7GWY2|F7GWY2_MACMU	SF3B2	0.0708	0.245	0.94	0.337	0.247	-0.155	-0.542	-0.499	-0.639	0.0392	-0.00904	0.503	0	-0.0253	-0.107	NA	NA	NA	NA
3913	Q13438	F6PU01	tr|F6PU01|F6PU01_MACMU	OS9	NA	NA	NA	NA	NA	NA	NA	NA	0.968	-0.0697	0.00741	0	-0.183	0.0721	-0.0435	NA	NA	NA	NA
14256	Q13442	F7BKG0	tr|F7BKG0|F7BKG0_MACMU	PDAP1	0.518	0.59	0	0.668	0.197	0.000105	-0.00189	-0.428	-0.146	-0.162	0.285	0.146	0.432	-0.0681	0.259	-0.348	-0.323	-0.198	-0.243
2453	Q13443	F6WJ32	tr|F6WJ32|F6WJ32_MACMU	ADAM9	0.137	-0.0953	0.0218	-0.193	-0.0865	0.099	-0.0104	-0.102	0.106	0.145	-0.0337	-0.0356	0.062	-0.0527	0.222	0.131	-0.0758	0.235	0
2883	Q13444	F7ED22	tr|F7ED22|F7ED22_MACMU	ADAM15	-0.143	-0.392	-0.207	-0.0666	0	0.448	0.0541	0.309	-0.0614	0.0123	-0.0679	-0.176	0.309	0.318	-0.0243	0.0558	-0.0111	0.0614	0.0804
11399	Q13449	F7FED6	tr|F7FED6|F7FED6_MACMU	LSAMP	0.104	0.0841	-0.217	0.184	-0.0592	-0.0464	-0.12	-0.0444	0.0785	0.0802	-0.0157	-0.03	-0.0397	0.199	-0.211	0.218	0.0209	0.656	0
846	Q13464	F6T5Y1	tr|F6T5Y1|F6T5Y1_MACMU	ROCK1	NA	NA	NA	NA	NA	NA	NA	NA	NA	NA	NA	NA	NA	NA	NA	0.205	-0.297	-0.106	0.106
11190	Q13508	F7H733	tr|F7H733|F7H733_MACMU	ART3	0.311	0.129	-0.203	-0.22	0.528	0	-0.0741	-0.354	-0.154	-0.0166	0.0721	0.358	-0.107	0.578	-0.128	0.225	0.312	0.37	-0.0522
7071	Q13509	F6QAX2	tr|F6QAX2|F6QAX2_MACMU	TUBB3	1.14	-0.00454	0.37	1.1	-0.125	0.358	-0.166	0.222	NA	NA	NA	NA	NA	NA	NA	-0.228	-0.247	-0.0958	0.00454
9014	Q13510	F6S5F3	tr|F6S5F3|F6S5F3_MACMU	ASAH1	-0.0704	-0.209	0	-0.238	-0.0365	0.178	-0.0271	-0.145	0.243	-0.198	0.098	0.0934	0.0408	0.011	-0.0459	0.384	0.338	-0.0785	0.278
14269	Q13519	F6QTL3	tr|F6QTL3|F6QTL3_MACMU	PNOC	0.538	0.389	-0.286	-0.385	-0.346	0.08	0.128	-0.00414	0.166	-0.226	-0.218	0	-0.00545	0.183	-0.337	-0.212	0.129	0.402	0.404
1778	Q13523	F7AWH3	tr|F7AWH3|F7AWH3_MACMU	PRPF4B	0.219	0.201	-0.46	-0.127	0.257	0.32	0.567	0.0509	0	-0.197	-0.0722	1.87	-0.206	-0.204	-0.155	NA	NA	NA	NA
15199	Q13526	F7HDX7	tr|F7HDX7|F7HDX7_MACMU	PIN1	0.416	0.791	0.138	0.618	0.251	-0.12	0.12	-0.382	NA	NA	NA	NA	NA	NA	NA	-0.538	-1.03	-0.668	-1.07
5414	Q13555	F7FD86	tr|F7FD86|F7FD86_MACMU	CAMK2G	0.329	0.14	-0.0656	-0.212	0.0698	-0.0958	0	-0.0658	-0.0483	0.142	-0.255	0.102	-0.0228	0.126	0.0792	0.0166	-0.0141	0.381	-0.128
8799	Q13561	F7H9W9	tr|F7H9W9|F7H9W9_MACMU	DCTN2	NA	NA	NA	NA	NA	NA	NA	NA	NA	NA	NA	NA	NA	NA	NA	-0.243	-0.0461	0.0797	0.0461
652	Q13576	F6U5V7	tr|F6U5V7|F6U5V7_MACMU	IQGAP2	0.123	-0.312	-0.0413	-0.43	0.183	0.0357	0.331	-0.0357	NA	NA	NA	NA	NA	NA	NA	NA	NA	NA	NA
1225	Q13591	F6TR62	tr|F6TR62|F6TR62_MACMU	SEMA5A	0.144	0.00169	-0.186	-0.021	-0.272	0.186	0.107	-0.286	-0.224	-0.228	-0.0826	-0.138	0.135	0.255	-0.526	0.309	0.163	0.229	0
3182	Q13617	F7HGX9	tr|F7HGX9|F7HGX9_MACMU	CUL2	NA	NA	NA	NA	NA	NA	NA	NA	-0.643	-0.762	-0.635	0.00885	0.226	0.116	-0.317	0	-0.8	0.435	0.0118
3017	Q13618	F6R900	tr|F6R900|F6R900_MACMU	CUL3	NA	NA	NA	NA	NA	NA	NA	NA	0.339	-0.032	-0.0243	0	-0.331	0.197	0.791	NA	NA	NA	NA
4700	Q13620	F7FCJ0	tr|F7FCJ0|F7FCJ0_MACMU	CUL4B	0.0878	0.176	-0.153	-0.185	0.357	-0.0561	-0.364	-0.352	0	-0.372	-0.675	0.223	0.155	0.652	0.103	NA	NA	NA	NA
10369	Q13630	F7FLX2	tr|F7FLX2|F7FLX2_MACMU	TSTA3	NA	NA	NA	NA	NA	NA	NA	NA	-0.0835	0.596	0.515	0	-0.0139	0.441	0.164	0.376	-0.0481	-0.272	-0.0674
2833	Q13634	F7FMS7	tr|F7FMS7|F7FMS7_MACMU	CDH18	0	-0.638	-0.515	-0.314	-0.264	-0.261	-0.212	0.769	-0.12	-0.0332	0.407	-0.821	0.0511	0.436	0.102	0.364	0.27	0.514	0.0218
8171	Q13641	F7CT46	tr|F7CT46|F7CT46_MACMU	TPBG	-0.0627	0	-0.142	-0.221	-0.0809	0.0819	0.235	0.363	0.103	0.188	-0.0147	0.0573	-0.158	0.0825	-0.244	NA	NA	NA	NA
9315	Q13642	F7HT18	tr|F7HT18|F7HT18_MACMU	FHL1	-0.0726	0.184	-0.00636	1.24	-0.273	-0.0274	0.367	-0.119	0.415	0.175	-0.0934	-0.0393	0.617	-0.034	0.355	0	0.148	-0.259	0.631
2478	Q13724	F7HKW2	tr|F7HKW2|F7HKW2_MACMU	MOGS	NA	NA	NA	NA	NA	NA	NA	NA	-0.344	-0.0298	0	-0.0874	0.591	-0.0838	0.349	-0.692	0.882	0.966	0.0332
1932	Q13733	F7DQE8	tr|F7DQE8|F7DQE8_MACMU	ATP1A4	-1.07	-0.241	0	-0.216	0.11	0.241	0.551	0.395	0.327	-0.415	-0.362	0.0876	-0.385	-0.539	0.192	NA	NA	NA	NA
4954	Q13740	F7E9U2	tr|F7E9U2|F7E9U2_MACMU	ALCAM	0.174	0.0315	-0.112	-0.16	-0.166	-0.305	-0.138	-0.271	0.126	-0.193	0.00132	0.11	-0.055	0.299	-0.148	0	0.186	0.0229	0.0323
7028	Q13748	F7H3X6	tr|F7H3X6|F7H3X6_MACMU	TUBA3C	0.7	0.225	0.0306	0.852	-0.439	0.264	-0.39	-0.347	-0.27	0.569	0	-0.406	0.0756	-0.0524	0.472	-0.172	0.0558	-0.32	-0.357
14158	Q13765	F6U241	tr|F6U241|F6U241_MACMU	NACA	NA	NA	NA	NA	NA	NA	NA	NA	0.0186	-0.0392	0.114	0.0979	0.0822	0	0.23	-0.117	-0.532	-0.282	-0.294
153	Q13813	F7HLP9	tr|F7HLP9|F7HLP9_MACMU	SPTAN1	0.167	0.377	0.467	0.487	0.48	-0.331	-0.192	-0.17	-0.495	0	0.36	0.626	0.154	-0.176	0.155	-0.294	-0.255	-0.221	-0.158
2165	Q13822	F7CJD6	tr|F7CJD6|F7CJD6_MACMU	ENPP2	0.538	-0.263	0.0726	0	-0.223	0.339	-0.335	-0.389	0.0715	-0.0501	0.271	-0.557	0.416	-0.166	-0.113	0.417	0.379	0.546	-0.184
7785	Q13867	F6SIE9	tr|F6SIE9|F6SIE9_MACMU	BLMH	-0.286	-0.0174	0.263	0.125	0.231	-0.0246	0.108	0.294	0.342	0.904	-0.282	-0.00976	-0.255	-0.461	0	NA	NA	NA	NA
1531	Q13905	F6XRQ1	tr|F6XRQ1|F6XRQ1_MACMU	RAPGEF1	-1.25	0.00279	0.0163	-0.141	-0.0992	0.0678	0.17	-0.0246	0.292	0.0952	0.067	-0.241	-0.859	-0.0746	0	-0.34	-0.0673	0.195	0.457
12924	Q13907	F7H516	tr|F7H516|F7H516_MACMU	IDI1	0.0726	0.243	-0.0837	0.74	0.1	-0.0837	-0.109	-0.045	0	0.0366	0.198	0.0799	-0.22	-0.197	0.0447	0.162	-0.195	-0.0257	-0.0305
15250	Q13938	F7HI93	tr|F7HI93|F7HI93_MACMU		0.327	0.636	-1.03	0.42	-0.226	0.434	-0.565	0.105	-0.713	-0.595	0.332	-0.224	0.387	-0.215	-0.309	0.363	0.275	-0.445	0
14984	Q14019	F7F1L7	tr|F7F1L7|F7F1L7_MACMU	COTL1	0.437	0.844	0.589	0.489	0.335	0.00227	-0.223	-0.111	-0.453	-0.0537	0.379	0.0709	0	0.238	-0.124	-0.0156	-0.337	-0.176	-0.0483
16170	Q14061	F6RE77	tr|F6RE77|F6RE77_MACMU	COX17	NA	NA	NA	NA	NA	NA	NA	NA	-0.521	-1.12	0.677	0.0387	0.107	-0.684	-0.172	0.0591	0	0.162	-0.193
9083	Q14103	F7AVH8	tr|F7AVH8|F7AVH8_MACMU	HNRNPD	0	0.451	0.072	0.0532	0.404	0.259	-0.585	0.121	0.0908	-0.126	-0.732	-0.0451	0.052	-0.362	0.0858	-0.367	-0.26	-0.223	-0.329
6584	Q14108	F7H503	tr|F7H503|F7H503_MACMU	SCARB2	NA	NA	NA	NA	NA	NA	NA	NA	NA	NA	NA	NA	NA	NA	NA	-0.368	-0.0614	0.371	0.0614
699	Q14112	F7E981	tr|F7E981|F7E981_MACMU	NID2	0.0658	-0.198	-0.0158	-0.308	-0.219	0.0115	-0.0936	-0.278	0.0805	-0.0936	0	0.18	-0.321	0.048	0.0478	-0.24	0.262	0.165	0.199
1755	Q14114	F6SDB7	tr|F6SDB7|F6SDB7_MACMU	LRP8	0.264	0.0494	-0.431	-0.134	0.0582	-0.113	0	-0.165	0.132	-0.237	-0.142	-0.22	-0.0767	0.305	-0.28	0.00837	0.356	0.351	0.0715
14060	Q14116	F6VUJ0	tr|F6VUJ0|F6VUJ0_MACMU	IL18	NA	NA	NA	NA	NA	NA	NA	NA	-1.14	-0.0324	1.84	-0.156	1.08	0.161	0.136	0.665	-0.181	0	-0.235
2245	Q14118	F6RU72	tr|F6RU72|F6RU72_MACMU	DAG1	0	-0.00998	-0.143	-0.0798	-0.14	-0.0552	0.0345	0.0717	0.0193	-0.0988	0.00838	-0.0595	0.0666	0.288	-0.194	-0.039	0.158	0.195	0.187
1443	Q14126	F7GWF5	tr|F7GWF5|F7GWF5_MACMU	DSG2	-0.297	-0.453	-0.283	0.0869	-0.364	0.305	-0.0125	0	-0.0511	-0.16	-0.132	-0.242	0.305	0.17	0.158	0.136	0.449	0.33	0.212
3629	Q14164	F7GM52	tr|F7GM52|F7GM52_MACMU	IKBKE	NA	NA	NA	NA	NA	NA	NA	NA	0.501	0.427	-0.12	-0.0228	0	-0.0274	0.261	NA	NA	NA	NA
11357	Q14165	F7HJM2	tr|F7HJM2|F7HJM2_MACMU	MLEC	-0.369	-0.176	0.0117	-0.224	-0.0466	0.273	-0.0917	0	-0.0141	-0.26	0.0265	-0.155	0.00198	0.23	-0.105	0.255	0.138	0.399	0.177
4058	Q14166	F6XXP3	tr|F6XXP3|F6XXP3_MACMU	TTLL12	-0.288	0.145	0.566	0.309	-0.576	-0.223	-0.264	2.18	NA	NA	NA	NA	NA	NA	NA	0.361	-0.397	-0.145	0.857
5028	Q14194	F7BMS3	tr|F7BMS3|F7BMS3_MACMU	CRMP1	0.217	0.0394	-0.459	0.303	-0.31	0.235	0.0605	-0.344	0	-0.417	0.5	-0.621	0.17	-0.309	0.611	-0.144	0.207	-0.403	-0.347
5169	Q14195	F6SAK8	tr|F6SAK8|F6SAK8_MACMU	DPYSL3	1.15	0.639	0.269	0.906	0.0215	-0.199	-0.358	-0.346	0.24	0.895	0.0128	-0.284	0	-0.426	0.519	-0.167	-0.416	-0.384	-0.472
1126	Q14203	F6T5J5	tr|F6T5J5|F6T5J5_MACMU	DCTN1	NA	NA	NA	NA	NA	NA	NA	NA	0.362	-0.112	0.672	0.203	0.162	-0.125	0	0.281	-1.32	-0.116	-0.17
18	Q14204	F6VUB3	tr|F6VUB3|F6VUB3_MACMU	DYNC1H1	0.479	0.505	0.188	0.694	-0.119	-0.0338	-0.102	-0.262	-0.127	0.226	0.0695	-0.178	0	-0.301	0.395	-0.133	0.191	-0.00222	0.112
8263	Q14240	F6SFF8	tr|F6SFF8|F6SFF8_MACMU	EIF4A2	NA	NA	NA	NA	NA	NA	NA	NA	0.187	-0.36	-0.0738	0	0.0161	-0.153	0.404	NA	NA	NA	NA
9753	Q14242	F6U5P4	tr|F6U5P4|F6U5P4_MACMU	SELPLG	0.00894	0.0116	-0.128	0	-0.108	-0.092	0.0105	-0.173	0.0104	0.0357	-0.118	0.0407	0.0756	-0.412	0.201	-0.148	0.0278	-0.528	-0.0232
9484	Q14254	F7ECQ7	tr|F7ECQ7|F7ECQ7_MACMU	FLOT2	NA	NA	NA	NA	NA	NA	NA	NA	NA	NA	NA	NA	NA	NA	NA	0.0932	-0.0416	0.0416	-0.127
10335	Q14257	F7HUK1	tr|F7HUK1|F7HUK1_MACMU	RCN2	NA	NA	NA	NA	NA	NA	NA	NA	NA	NA	NA	NA	NA	NA	NA	0.0465	0.119	-0.0465	-0.261
4605	Q14264	F7EYZ9	tr|F7EYZ9|F7EYZ9_MACMU	ERV3-1	0	0.263	0.0907	0.612	-0.0958	0.304	-0.509	-0.107	-0.0104	0.178	0.328	-0.314	0.227	-0.43	-0.137	0.469	-0.0181	0.111	-0.244
7102	Q14314	F7HKS2	tr|F7HKS2|F7HKS2_MACMU	FGL2	0.0636	-0.088	-0.228	-0.283	-0.0818	0.124	-0.0184	0.123	0.223	0.123	0.0852	-0.181	-0.35	-0.224	-0.0628	0.409	0.249	0	0.209
112	Q14315	F7GZ17	tr|F7GZ17|F7GZ17_MACMU	FLNC	-0.00965	-0.253	0.0852	-0.111	-0.0154	0.393	0.249	0.408	0	0.433	-0.106	-0.399	-0.254	-0.27	0.235	0.0827	0.112	-0.265	0.0359
6556	Q14332	F7GPB5	tr|F7GPB5|F7GPB5_MACMU	FZD2	-0.0458	-0.276	-0.117	-0.24	-0.0283	0	0.135	0.435	0.245	-0.0563	-0.14	-0.0368	0.128	0.345	-0.102	0.128	0.152	0.255	0.0761
4286	Q14392	F6YRW1	tr|F6YRW1|F6YRW1_MACMU	LRRC32	0.277	0.705	0.315	0.322	0.374	-0.608	-0.605	-0.73	NA	NA	NA	NA	NA	NA	NA	-0.894	-0.277	0.958	-0.788
3730	Q14393	F6SWZ6	tr|F6SWZ6|F6SWZ6_MACMU	GAS6	-0.161	-0.0757	-0.166	-0.585	-0.402	0.397	0.462	-0.0175	0	-0.105	0.371	-0.361	0.418	-0.0542	0.45	0.227	0.448	0.344	0.244
4050	Q14435	F6R689	tr|F6R689|F6R689_MACMU	GALNT3	-0.337	-0.318	-0.305	0.127	-0.173	0.0841	0.506	0.343	0.315	0.371	-0.552	0	-0.184	-0.0605	0.162	-0.00531	0.00264	-0.299	0.0647
15362	Q14508	F7HII8	tr|F7HII8|F7HII8_MACMU	WFDC2	-0.305	0.534	-1.14	-0.144	0.196	0.907	0.351	0.831	0	-0.16	-0.0078	0.805	-0.133	0.151	-0.404	-0.0225	-0.23	0.893	0.514
4296	Q14515	F6R2E7	tr|F6R2E7|F6R2E7_MACMU	SPARCL1	0.113	-0.0893	-0.16	0.023	0.0777	-0.213	-0.0379	-0.386	0.0433	-0.137	-0.1	-0.0399	0	0.289	-0.306	0.152	0.0903	0.463	0.25
19	Q14517	F7ER09	tr|F7ER09|F7ER09_MACMU	FAT1	0.237	-0.319	-0.257	-0.055	0.175	-0.161	0.207	-0.19	0.138	-0.139	-0.141	-0.0703	0.191	0.373	0	0.257	0.144	0.2	-0.012
4772	Q14520	F7DAC5	tr|F7DAC5|F7DAC5_MACMU	HABP2	-0.369	0.0451	-0.23	-0.219	0.0537	-0.237	0.466	0.455	0.021	0.439	-0.662	0.322	-0.264	0	0.11	-0.215	-0.353	-0.225	0.0114
6184	Q14533	F7HIB9	tr|F7HIB9|F7HIB9_MACMU	KRT81	NA	NA	NA	NA	NA	NA	NA	NA	0.119	0.0851	0	-0.321	-0.211	-0.204	0.422	NA	NA	NA	NA
9787	Q14558	F7EXR2	tr|F7EXR2|F7EXR2_MACMU	PRPSAP1	NA	NA	NA	NA	NA	NA	NA	NA	0.208	0.307	-0.0133	0.271	-0.3	-0.704	0	NA	NA	NA	NA
3033	Q14563	F6T171	tr|F6T171|F6T171_MACMU	SEMA3A	NA	NA	NA	NA	NA	NA	NA	NA	0.245	-0.187	0	-0.247	0.624	-0.326	0.668	NA	NA	NA	NA
13705	Q14568	F6WPP9	tr|F6WPP9|F6WPP9_MACMU		0.322	0.588	0.531	0	0.543	-0.516	-0.423	-0.218	-0.233	0.0554	0.36	0.00739	-0.307	-0.443	-0.13	NA	NA	NA	NA
107	Q14571	F7A818	tr|F7A818|F7A818_MACMU	ITPR2	NA	NA	NA	NA	NA	NA	NA	NA	NA	NA	NA	NA	NA	NA	NA	-0.0734	0.278	-0.867	0.0734
2922	Q14574	F7DB50	tr|F7DB50|F7DB50_MACMU	DSC3	-0.331	-0.44	-0.316	-0.0417	-0.288	0.241	0.108	0.0281	-0.0608	-0.0824	-0.135	-0.313	0.533	0.00375	0	0.324	0.691	0.41	0.541
2393	Q14624	F7GAG4	tr|F7GAG4|F7GAG4_MACMU	ITIH4	-0.202	0.205	0.32	0	-0.265	-0.378	0.774	0.369	0.422	0.853	-0.357	0.506	-0.268	-0.338	0.397	-0.2	-1.09	-0.126	0.596
190	Q14667	F7F9P5	tr|F7F9P5|F7F9P5_MACMU	KIAA0100	0.148	-0.114	0.0392	-0.79	0.0367	-0.0367	0.0989	-0.197	NA	NA	NA	NA	NA	NA	NA	NA	NA	NA	NA
434	Q14674	F7HTH0	tr|F7HTH0|F7HTH0_MACMU	ESPL1	NA	NA	NA	NA	NA	NA	NA	NA	-0.0382	0.555	-0.238	0.198	0.33	-0.0385	0	NA	NA	NA	NA
14863	Q14696	F6XA44	tr|F6XA44|F6XA44_MACMU	MESDC2	1.15	-0.471	-0.0906	-0.751	-0.653	0.0906	0.114	0.32	NA	NA	NA	NA	NA	NA	NA	NA	NA	NA	NA
1393	Q14703	F7G9K6	tr|F7G9K6|F7G9K6_MACMU	MBTPS1	NA	NA	NA	NA	NA	NA	NA	NA	NA	NA	NA	NA	NA	NA	NA	-0.0378	0.0378	0.195	-0.239
5096	Q14738	F7ANY9	tr|F7ANY9|F7ANY9_MACMU	PPP2R5D	NA	NA	NA	NA	NA	NA	NA	NA	NA	NA	NA	NA	NA	NA	NA	-0.0395	0.0395	-0.114	0.102
401	Q14766	F7EB76	tr|F7EB76|F7EB76_MACMU	LTBP1	0.154	-0.25	0.216	-0.317	-0.0173	-0.227	-0.0115	-0.0294	0.0585	-0.209	-0.205	0.0289	0.0194	-0.0246	0.119	0.00527	0.251	0.00967	0
439	Q14767	F7DH92	tr|F7DH92|F7DH92_MACMU	LTBP2	-0.302	-0.197	0	-0.197	-0.235	0.247	0.33	0.129	-0.0631	-0.212	-0.0265	0.0057	0.111	-0.0661	0.205	-0.0591	0.331	0.326	0.0346
83	Q14789	F7FS54	tr|F7FS54|F7FS54_MACMU	GOLGB1	0	-0.206	-0.219	0.18	-0.23	0.168	-0.169	0.472	0.251	-0.00579	-0.231	0.124	-0.0939	0.156	-0.297	0.427	0.151	0.514	-0.167
11823	Q14847	F7CPT5	tr|F7CPT5|F7CPT5_MACMU	LASP1	0.777	0.349	0.333	0.411	0.329	0	0.0582	-0.0964	-0.359	-0.00684	0.102	0.00556	-0.00553	0.0806	-0.163	-0.0892	-0.0386	-0.285	-0.055
10857	Q14894	F7DC75	tr|F7DC75|F7DC75_MACMU	CRYM	0.568	0.212	0.238	0.0812	0.437	-0.35	-0.341	-0.562	-0.37	-0.341	0.462	0.43	0.105	0	0.118	-0.644	-0.76	-0.331	-0.489
10788	Q14914	F7ENQ4	tr|F7ENQ4|F7ENQ4_MACMU	PTGR1	NA	NA	NA	NA	NA	NA	NA	NA	NA	NA	NA	NA	NA	NA	NA	-0.14	0.403	-0.206	0.14
5125	Q14956	F7E7X4	tr|F7E7X4|F7E7X4_MACMU	GPNMB	-0.203	0	-0.00635	0.213	0.119	-0.0804	-0.0751	-0.131	0.0237	0.12	0.0284	1.14	-0.144	0.298	-0.295	0.15	-0.158	0.141	-0.481
3365	Q14974	F7AQQ3	tr|F7AQQ3|F7AQQ3_MACMU	KPNB1	0.0459	0.038	-0.104	0.0307	0.113	0.572	-0.0508	0.0833	-0.0228	-0.264	0.0408	-0.251	0.346	0.16	-0.304	0	-0.318	-0.119	-0.208
9660	Q14982	F6WLQ2	tr|F6WLQ2|F6WLQ2_MACMU	OPCML	0.096	0.378	-0.133	0.19	0.0245	-0.146	-0.183	-0.272	-0.0163	-0.314	-0.0146	0.378	-0.0337	0.326	-0.271	0	0.31	0.7	0.161
1269	Q149M9	F7A9G1	tr|F7A9G1|F7A9G1_MACMU	NWD1	NA	NA	NA	NA	NA	NA	NA	NA	0.626	0	-0.0424	0.47	-0.363	-0.39	0.484	NA	NA	NA	NA
1547	Q14C87	F7E3U2	tr|F7E3U2|F7E3U2_MACMU	TMEM132D	0.294	-0.0581	0.0247	-0.282	-0.0498	0	0.102	0.124	0.117	-0.254	-0.358	0.465	-0.193	-0.165	0.177	-0.339	0.105	0.443	-0.0864
2060	Q14CX7	F6QVJ9	tr|F6QVJ9|F6QVJ9_MACMU	NAA25	-0.0643	-0.33	0.1	0.0643	-0.0796	-0.364	0.666	0.316	NA	NA	NA	NA	NA	NA	NA	NA	NA	NA	NA
8762	Q14CZ8	F7ECU8	tr|F7ECU8|F7ECU8_MACMU	HEPACAM	-0.347	-0.523	0.0227	-0.217	-0.252	0	0.301	0.254	0.034	-0.0766	-0.194	-0.136	-0.00816	-0.302	0.109	0.27	0.302	0.109	0.00215
9222	Q15019	F6R3X6	tr|F6R3X6|F6R3X6_MACMU	2017-09-02	0.223	0.611	0.105	0.932	-0.121	0.219	-0.266	-0.5	-0.501	0.155	0.113	-0.418	0.388	-0.166	1.17	-0.138	0	-0.209	-0.137
4048	Q15027	F7HLN4	tr|F7HLN4|F7HLN4_MACMU	ACAP1	NA	NA	NA	NA	NA	NA	NA	NA	1.23	0.914	0	-0.572	-0.131	-1.26	0.848	NA	NA	NA	NA
5066	Q15046	F6TVG1	tr|F6TVG1|F6TVG1_MACMU	KARS	NA	NA	NA	NA	NA	NA	NA	NA	NA	NA	NA	NA	NA	NA	NA	-0.459	0.213	0.304	-0.213
3434	Q15059	F6YTC0	tr|F6YTC0|F6YTC0_MACMU	BRD3	-0.222	0.779	0.975	-0.663	-0.46	-0.289	0.222	1.26	NA	NA	NA	NA	NA	NA	NA	NA	NA	NA	NA
2670	Q15063	F6ZVK0	tr|F6ZVK0|F6ZVK0_MACMU	POSTN	-0.0042	-0.207	0	-0.204	0.309	0.298	0.128	0.286	0.44	0.639	-0.439	-0.0849	-0.0309	0.106	0.367	-0.228	0.0322	-0.231	-0.0299
3999	Q15067	F7ALM8	tr|F7ALM8|F7ALM8_MACMU	ACOX1	NA	NA	NA	NA	NA	NA	NA	NA	NA	NA	NA	NA	NA	NA	NA	0.322	-1.9	0.264	-0.264
851	Q15075	F7BBE3	tr|F7BBE3|F7BBE3_MACMU	EEA1	NA	NA	NA	NA	NA	NA	NA	NA	1.55	-0.807	0	0.485	0.628	0.4	-0.654	0.754	-0.177	-0.849	-0.389
12676	Q15102	F7GVZ1	tr|F7GVZ1|F7GVZ1_MACMU	PAFAH1B3	0.0327	0.145	0.164	0.475	-0.0327	0.243	-0.298	-0.197	NA	NA	NA	NA	NA	NA	NA	-0.155	-0.152	-0.189	0.0652
7325	Q15113	F7GZY1	tr|F7GZY1|F7GZY1_MACMU	PCOLCE	-0.079	-0.0496	0	-0.231	0.0682	-0.00892	0.283	-0.0992	0.605	-0.0895	0.692	0.15	-0.489	-0.0902	0.368	0.136	0.502	-0.0179	0.279
15599	Q15121	F7DQD4	tr|F7DQD4|F7DQD4_MACMU	PEA15	0.856	0.696	0.333	0.567	0.326	-0.185	-0.119	-0.22	-0.342	0	0.281	-0.0329	0.579	0.152	0.178	-0.0515	-0.256	-0.0261	-0.246
6100	Q15124	F7HU87	tr|F7HU87|F7HU87_MACMU	PGM5	NA	NA	NA	NA	NA	NA	NA	NA	-0.377	-0.308	-0.0425	-0.774	1.22	-0.261	0.794	0.533	0.388	0.595	0
20	Q15149	F7ABN9	tr|F7ABN9|F7ABN9_MACMU	PLEC	0.343	0.446	0.247	0.31	0.233	-0.125	-0.245	-0.285	-0.201	-0.102	0.474	0.191	0.22	0	0.0152	-0.159	-0.354	-0.113	-0.256
9569	Q15165	F7H7I7	tr|F7H7I7|F7H7I7_MACMU	PON2	-0.167	0	-0.118	-0.258	0.0881	0.267	-0.154	-0.359	0.304	0.0198	-0.413	-0.359	0.151	0.185	-0.0296	0.233	-0.114	0.662	0.114
9766	Q15166	F7H7I9	tr|F7H7I9|F7H7I9_MACMU	PON3	-0.659	-0.169	1.3	0.169	0.196	-0.588	1.03	0.65	NA	NA	NA	NA	NA	NA	NA	-0.377	-0.3	-0.743	0.523
10776	Q15181	F7GWS5	tr|F7GWS5|F7GWS5_MACMU	PPA1	0.321	0.953	0.132	0.839	-0.156	0.103	-0.0322	-0.556	-0.445	0.129	0.0898	-0.384	0	-0.246	0.162	0.268	-0.387	-0.152	-0.495
14345	Q15185	F6Q847	tr|F6Q847|F6Q847_MACMU	PTGES3	0.155	0.434	0.0187	0.104	-0.0968	-0.0471	0.0964	-0.0521	NA	NA	NA	NA	NA	NA	NA	-0.00553	-0.279	-0.581	0.00553
6659	Q15233	F6UC36	tr|F6UC36|F6UC36_MACMU	NONO	NA	NA	NA	NA	NA	NA	NA	NA	0.157	0	-0.0545	0.325	0.123	0.49	-0.0711	-0.374	-0.326	0.0589	-0.213
4393	Q15256	F7FX70	tr|F7FX70|F7FX70_MACMU	PTPRR	0.411	0	0.172	0.348	0.32	-0.295	-0.337	-0.418	-0.11	-0.272	0.303	0.453	0.165	0.162	-0.252	-0.238	-4.92e-05	0.54	-0.235
11567	Q15274	F7H283	tr|F7H283|F7H283_MACMU	QPRT	-0.174	0.00184	0.0682	0.0299	-0.043	0.179	0.0857	-0.0925	0	0.237	-0.0293	-0.0403	-0.134	-0.32	-0.108	0.0424	0.084	0.209	-0.0334
2424	Q15283	F6X9K0	tr|F6X9K0|F6X9K0_MACMU	RASA2	NA	NA	NA	NA	NA	NA	NA	NA	NA	NA	NA	NA	NA	NA	NA	0.0177	-0.248	-0.000185	0.000185
804	Q15303	F7G3H1	tr|F7G3H1|F7G3H1_MACMU	ERBB4	-0.423	-0.143	-0.23	-0.862	-0.083	0.162	-0.122	0.254	0.301	-1.02	0.391	-0.381	-0.67	0.476	0.0105	0	0.45	0.0434	0.158
6747	Q15306	F7A8U9	tr|F7A8U9|F7A8U9_MACMU	IRF4	0.0211	-0.293	0.0506	-0.44	0.387	-0.17	0.0499	-0.0211	NA	NA	NA	NA	NA	NA	NA	NA	NA	NA	NA
15513	Q15369	F7DAS0	tr|F7DAS0|F7DAS0_MACMU	TCEB1	NA	NA	NA	NA	NA	NA	NA	NA	NA	NA	NA	NA	NA	NA	NA	-0.466	0.0416	-0.0416	0.0472
15483	Q15370	F6XRN0	tr|F6XRN0|F6XRN0_MACMU	TCEB2	0.615	0.976	0.447	0.767	0.00999	-0.405	-0.401	-0.792	-0.835	0.154	0.709	-0.471	0.3	0	0.0737	-0.375	-0.246	-0.66	-0.444
2500	Q15375	F6U3X2	tr|F6U3X2|F6U3X2_MACMU	EPHA7	-0.118	0.193	-0.242	0.275	-0.0569	-0.0204	-0.00243	0.0108	0.0158	-0.277	0.122	0	-0.216	0.291	-0.178	-0.00845	0.434	0.588	0.205
14954	Q15388	F7DT16	tr|F7DT16|F7DT16_MACMU	TOMM20	-0.386	0.0585	-0.178	-0.0585	-0.133	0.711	0.144	0.357	NA	NA	NA	NA	NA	NA	NA	NA	NA	NA	NA
12648	Q15404	F7GPH3	tr|F7GPH3|F7GPH3_MACMU	RSU1	NA	NA	NA	NA	NA	NA	NA	NA	-0.209	0.665	-0.0257	-0.162	0.548	0.327	0.517	0	-0.247	-0.206	0.313
10000	Q15417	F7G309	tr|F7G309|F7G309_MACMU	CNN3	NA	NA	NA	NA	NA	NA	NA	NA	NA	NA	NA	NA	NA	NA	NA	-0.0446	0.188	-0.312	0.0446
2040	Q15431	F6UAT5	tr|F6UAT5|F6UAT5_MACMU	SYCP1	-0.53	-0.0362	0.265	-0.23	0.208	0	0.264	0.508	0.413	-0.0763	-0.207	0.318	-0.279	-0.425	0.569	NA	NA	NA	NA
10273	Q15435	F7GK02	tr|F7GK02|F7GK02_MACMU	PPP1R7	0.212	0.34	0.168	0.264	0.268	-0.291	-0.459	-0.424	-0.494	-0.319	0.0842	0.218	1.01	0.178	-0.264	-0.377	-0.535	0	-0.329
1232	Q15477	F6YDJ2	tr|F6YDJ2|F6YDJ2_MACMU	SKIV2L	-0.313	-0.0689	0.0689	0.368	0.147	-0.137	-0.106	0.591	NA	NA	NA	NA	NA	NA	NA	NA	NA	NA	NA
10548	Q15485	F7BQZ1	tr|F7BQZ1|F7BQZ1_MACMU	FCN2	-0.577	-0.604	0.295	0.252	-0.439	0.111	1.28	0.872	0.449	0.107	-0.275	0	-0.186	-0.195	0.0467	-0.453	-0.636	-0.545	0.0858
10823	Q15493	F7CQV0	tr|F7CQV0|F7CQV0_MACMU	RGN	0.458	0.491	-0.115	0.177	-0.0238	-0.225	-0.131	-0.306	-0.108	-0.0989	0.128	-0.214	0.309	0	0.228	0.216	0.0613	0.367	-0.146
3977	Q15582	F6YTU1	tr|F6YTU1|F6YTU1_MACMU	TGFBI	0.059	-0.241	-0.01	-0.557	0.0305	-0.127	0.211	0.118	0.115	0	-0.362	0.13	-0.0236	0.101	-0.192	0.0902	0.0188	-0.502	-0.0794
13056	Q15631	F7HU57	tr|F7HU57|F7HU57_MACMU	TSN	-6.46e-05	0.405	0.145	0.878	0.0653	-0.167	-0.298	3.59e-05	-0.1	0.182	0.188	-0.381	0.000756	0	0.105	-0.17	-0.193	-0.788	-0.084
11994	Q15691	F7GS88	tr|F7GS88|F7GS88_MACMU	MAPRE1	0.332	0.351	0.114	0.203	0.116	-0.106	-0.0434	0	-0.0447	0.0539	-0.0983	-0.0919	0.111	0.0604	0.15	-0.147	-0.186	-0.695	-0.271
11517	Q15768	F7HBZ0	tr|F7HBZ0|F7HBZ0_MACMU	EFNB3	-0.234	-0.364	0.45	0.0805	-0.106	-0.171	0.317	1	1.12	-0.0286	-0.0206	0	-0.153	0.00179	0.115	-0.216	0.0406	-0.0349	0.0421
123	Q15772	F7ERP9	tr|F7ERP9|F7ERP9_MACMU	SPEG	0.0317	-0.254	-0.209	-0.0536	-0.0317	0.37	0.318	0.302	NA	NA	NA	NA	NA	NA	NA	NA	NA	NA	NA
7617	Q15818	F7BPE4	tr|F7BPE4|F7BPE4_MACMU	NPTX1	0.196	-0.0274	-0.286	0	0.0311	-0.22	-0.0216	-0.0922	0.434	-0.0852	-0.199	-0.0391	0.0291	0.363	-0.223	0.0969	0.28	0.398	0.162
14952	Q15828	F7B7R7	tr|F7B7R7|F7B7R7_MACMU	CST6	0	-0.511	0.0595	-0.178	0.041	-0.759	0.302	-0.105	-0.028	-0.0972	0.204	0.127	-0.709	0.336	-0.794	0.751	0.734	0.775	-0.204
15846	Q15836	F6YMH2	tr|F6YMH2|F6YMH2_MACMU	VAMP3	NA	NA	NA	NA	NA	NA	NA	NA	0.0869	-0.0639	0.0804	-0.22	0.0563	-0.187	0.197	0	0.0748	-0.332	-0.0223
16056	Q15843	F7FS40	tr|F7FS40|F7FS40_MACMU	NEDD8	1.11	1.01	0.665	0.696	0.544	-0.426	-0.663	-0.741	-0.514	-0.125	0.655	0.337	0.359	0.39	-0.0296	-0.191	0	-0.116	-0.215
16138	Q15847	F7H4Y0	tr|F7H4Y0|F7H4Y0_MACMU	ADIRF	0.247	0.268	0.32	-0.364	-0.184	-0.365	0	0.0655	-0.169	-0.143	-0.293	0.113	0.0501	-0.0232	0.0471	0.00953	-0.174	0.0214	-0.0275
12396	Q15848	F7HQ03	tr|F7HQ03|F7HQ03_MACMU	ADIPOQ	-0.0304	-0.237	-0.21	-0.289	0	0.343	0.637	0.84	0.457	0.962	0.289	0.244	-0.19	-0.0322	0.452	-0.688	0.487	-0.051	-0.247
8973	Q15904	F7GKQ8	tr|F7GKQ8|F7GKQ8_MACMU	ATP6AP1	-0.0724	-0.203	-0.152	-0.214	0.0247	-0.131	0.251	0.14	0.0766	0.00315	-0.323	-0.0199	0	0.118	0.123	-0.126	0.277	-0.0576	0.011
15211	Q16143	F7H5W4	tr|F7H5W4|F7H5W4_MACMU	SNCB	0.334	0.322	0.17	-0.0384	0.143	-0.381	-0.0654	-0.482	-0.198	-0.0373	-0.49	0.662	0.0731	0.125	0.0212	-0.701	0	0.0389	-0.381
7598	Q16181	F7DQT7	tr|F7DQT7|F7DQT7_MACMU	2017-09-07	0.405	0.465	0.176	0.609	0.0841	-0.054	-0.329	-0.397	-0.487	0.0943	0.088	-0.247	0.251	0	0.0428	-0.267	-0.264	-0.619	-0.367
8300	Q16186	F7FSU5	tr|F7FSU5|F7FSU5_MACMU	ADRM1	0.34	0.539	0	0.346	0.424	-0.21	-0.402	-0.929	-0.553	-1.38	-0.437	0.935	0.217	0.941	-0.93	NA	NA	NA	NA
11256	Q16270	F6QI33	tr|F6QI33|F6QI33_MACMU	IGFBP7	0.162	-0.534	0.226	-0.109	-0.389	0.777	-0.406	-0.43	0	0.322	0.342	-0.523	0.797	-0.297	-0.408	0.965	0.397	0.339	-0.287
6912	Q16352	F7DY27	tr|F7DY27|F7DY27_MACMU	INA	1.05	0.655	0.253	0.523	0.293	-0.42	-0.29	-0.859	-0.762	0	0.261	-0.258	0.723	0.249	0.681	-0.623	-0.409	-0.8	-0.536
383	Q16363	F6PZI2	tr|F6PZI2|F6PZI2_MACMU	LAMA4	-0.123	-0.124	-0.0515	0.075	-0.0356	0.17	0	-0.0178	-0.0331	0.0443	0.172	-0.25	-0.0144	0.141	-0.0968	0.124	0.188	0.136	0.101
10472	Q16401	F6WEF0	tr|F6WEF0|F6WEF0_MACMU	PSMD5	0	0.661	-0.0656	0.482	0.0195	0.111	-0.394	-0.197	-0.446	0.298	0.408	-0.212	0.107	0.683	-0.265	-0.202	-0.18	0.0341	-0.00932
1330	Q16531	F6SHK7	tr|F6SHK7|F6SHK7_MACMU	DDB1	-0.123	-0.141	0.0623	-0.14	0.0775	-0.139	0.071	0.356	-0.164	-0.105	0.107	-0.123	0.384	0.0499	0.192	0	-0.23	0.163	-0.0774
9200	Q16539	F6V343	tr|F6V343|F6V343_MACMU	MAPK14	NA	NA	NA	NA	NA	NA	NA	NA	NA	NA	NA	NA	NA	NA	NA	-0.113	-0.133	0.113	0.277
8708	Q16543	F7DRC7	tr|F7DRC7|F7DRC7_MACMU	CDC37	0.129	0.264	0.227	0.221	0.0856	-0.211	-0.189	-0.178	-0.262	0	0.0255	0.138	0.0116	-0.0311	0.161	-0.367	-0.274	-0.185	-0.35
2719	Q16549	F6WWR1	tr|F6WWR1|F6WWR1_MACMU	PCSK7	0.0579	-0.143	-0.463	-0.733	0.0147	-0.0147	0.375	0.502	NA	NA	NA	NA	NA	NA	NA	NA	NA	NA	NA
15217	Q16553	F6TDN8	tr|F6TDN8|F6TDN8_MACMU	LY6E	0.332	-0.0812	-0.258	-0.352	-0.127	-0.0463	0.0473	-0.0474	-0.146	0.0816	-0.35	0.0278	0.243	0.406	-0.105	0.0342	0.0772	0.578	0
5193	Q16555	F7DF35	tr|F7DF35|F7DF35_MACMU	DPYSL2	0.62	0.574	0.359	0.768	-0.0669	-0.0159	0	0.172	-0.491	0.631	0.489	-0.308	0.361	-0.117	0.72	-0.177	-0.289	-0.406	-0.107
7462	Q16566	F7H273	tr|F7H273|F7H273_MACMU	CAMK4	0.681	-0.0148	0.293	0.0148	0.392	-0.42	-0.719	-1.11	NA	NA	NA	NA	NA	NA	NA	NA	NA	NA	NA
15524	Q16568	F6WIA0	tr|F6WIA0|F6WIA0_MACMU	CARTPT	0.1	0.0862	-0.0809	0.152	-0.281	0.0672	-0.0971	-0.33	-0.172	0	0.0156	0.0473	0.0543	0.146	-0.124	-0.000393	-0.301	0.97	-0.243
7621	Q16581	F7GR11	tr|F7GR11|F7GR11_MACMU	C3AR1	NA	NA	NA	NA	NA	NA	NA	NA	0.0953	-0.0897	0.0577	0	-0.157	0.351	-0.00373	NA	NA	NA	NA
5398	Q16610	F7H532	tr|F7H532|F7H532_MACMU	ECM1	0.117	0.0212	0.307	-0.183	0	-0.312	0.0374	0.144	0.641	0.617	-0.0271	0.422	-0.364	-0.14	-0.236	-0.091	-0.0872	-0.0289	0.175
2439	Q16620	F7DGX5	tr|F7DGX5|F7DGX5_MACMU	NTRK2	-0.0598	0.378	0.0107	0.116	-0.0688	0	-0.292	-0.0413	0.013	-0.17	-0.0206	-0.0956	-0.0313	0.0895	-0.0765	0.176	0.204	0.472	0.148
11731	Q16623	F7GT55	tr|F7GT55|F7GT55_MACMU	STX1A	-0.259	0.192	-0.0345	-0.0302	-0.029	0.59	-0.178	-0.198	0.536	0.236	0.422	0.115	-0.428	-0.614	0.564	0.372	-0.347	0.234	0
12622	Q16629	F7GQT1	tr|F7GQT1|F7GQT1_MACMU	SRSF7	NA	NA	NA	NA	NA	NA	NA	NA	-0.0633	0	0.309	0.0157	0.0788	-0.172	0.63	-0.0569	0.204	-0.39	-0.147
6879	Q16658	F7EX32	tr|F7EX32|F7EX32_MACMU	FSCN1	0.139	0.309	0.0105	0.33	-0.128	0.0806	-0.0699	-0.26	-0.0462	0.154	0.249	-0.367	-0.239	0	-0.0519	0.0289	0.0954	-0.214	-0.0149
6771	Q16696	F7GWT6	tr|F7GWT6|F7GWT6_MACMU	CYP2A13	-0.0422	-0.268	0.224	-0.294	0.0422	0.51	0.387	-0.142	NA	NA	NA	NA	NA	NA	NA	NA	NA	NA	NA
10354	Q16698	F7H3Z1	tr|F7H3Z1|F7H3Z1_MACMU	DECR1	NA	NA	NA	NA	NA	NA	NA	NA	NA	NA	NA	NA	NA	NA	NA	0.58	-0.186	-0.174	0.174
1268	Q16760	F6W4W0	tr|F6W4W0|F6W4W0_MACMU	DGKD	-0.522	0.334	-0.125	0.265	-0.0826	-0.153	0.0826	0.209	NA	NA	NA	NA	NA	NA	NA	NA	NA	NA	NA
10972	Q16762	F7EJU8	tr|F7EJU8|F7EJU8_MACMU	TST	NA	NA	NA	NA	NA	NA	NA	NA	NA	NA	NA	NA	NA	NA	NA	0.163	-0.122	-0.416	0.122
9298	Q16769	F7GTQ0	tr|F7GTQ0|F7GTQ0_MACMU	QPCT	0.0329	0	0.0166	-0.107	-0.0779	-0.00759	-0.0723	-0.149	0.244	-0.238	0.193	-0.449	0.000543	-0.109	-0.274	0.294	0.252	0.907	0.152
10795	Q16775	F6YDU0	tr|F6YDU0|F6YDU0_MACMU	HAGH	0.231	0.181	-0.00395	0.488	0.536	-0.0427	-0.283	-0.582	-0.325	0.11	0.399	-0.0393	0.176	0	0.168	0.0488	-0.0149	-0.323	-0.0628
15342	Q16777	F7BRD9	tr|F7BRD9|F7BRD9_MACMU	HIST2H2AC	0.0605	0	-0.206	-0.376	0.432	0.421	-0.106	0.385	0.4	-0.0356	-0.142	0.229	0.206	-0.298	0.522	-0.00669	0.0181	-0.363	-0.033
59	Q16787	F6ZDE9	tr|F6ZDE9|F6ZDE9_MACMU	LAMA3	-0.0641	-0.0708	0.000569	-0.0378	-0.000569	1.22	0.0526	0.237	NA	NA	NA	NA	NA	NA	NA	NA	NA	NA	NA
3903	Q16799	F7HG99	tr|F7HG99|F7HG99_MACMU	RTN1	0.12	0.337	0.12	0.435	0.126	-0.141	-0.402	-0.418	-0.514	-0.623	0.432	0.422	0.116	8.31e-05	-0.135	-0.503	-0.548	0	-0.616
2320	Q16832	F7HJQ2	tr|F7HJQ2|F7HJQ2_MACMU	DDR2	-0.223	-0.222	-0.264	-0.0533	0.107	1.68	0.0533	0.304	NA	NA	NA	NA	NA	NA	NA	NA	NA	NA	NA
2011	Q16849	F7H047	tr|F7H047|F7H047_MACMU	PTPRN	0.602	0.152	-0.214	-0.227	-0.363	-0.219	0	-0.22	0.0146	-0.18	-0.287	-0.3	0.156	0.167	-0.297	0.022	0.263	0.658	0.161
6172	Q16851	F7DKM9	tr|F7DKM9|F7DKM9_MACMU	UGP2	0.14	0.137	0.375	0.21	-0.0146	-0.238	-0.253	0.524	0	0.128	0.105	-0.216	-0.0243	-0.35	0.0884	0.0888	-0.468	-0.371	-0.157
2983	Q16853	F7GP66	tr|F7GP66|F7GP66_MACMU	AOC3	-0.264	-0.277	0.0948	0	0.0405	-0.78	0.616	0.394	0.101	0.442	-0.682	0.401	-0.187	-0.389	0.276	0.0109	-0.303	-0.264	-0.0629
5835	Q16891	F7AFW9	tr|F7AFW9|F7AFW9_MACMU	IMMT	0.734	0.0871	0.166	-0.136	-0.0549	-0.331	-0.101	-0.0907	-0.155	-0.512	0.791	0.198	0.471	0.138	-0.607	0	0.454	0.383	-0.278
4788	Q17RC7	F6R3R0	tr|F6R3R0|F6R3R0_MACMU	EXOC3L4	-1.16	0.136	0.677	0.401	-0.315	1.5	-0.533	0.0581	-0.357	0	0.238	-0.268	0.28	-0.917	-0.493	NA	NA	NA	NA
1648	Q24JP5	F7G7B9	tr|F7G7B9|F7G7B9_MACMU	TMEM132A	0.0117	-0.0966	-0.153	0.0353	-0.0505	-0.143	0.168	-0.0494	0.0816	-0.0912	-0.232	0	0.118	0.0724	0.0486	-0.172	0.0281	0.0854	-0.0417
12690	Q2KHN1	F7HSW3	tr|F7HSW3|F7HSW3_MACMU	RNF151	NA	NA	NA	NA	NA	NA	NA	NA	0.194	0.0858	-0.119	0.306	-0.15	-0.299	0	-0.761	-0.987	0.136	0.864
1154	Q2M1K9	F6VG57	tr|F6VG57|F6VG57_MACMU	ZNF423	0.487	-0.031	-0.0638	-0.0158	0.0162	-0.392	-0.0379	-0.4	0.325	0	0.336	-0.0467	-0.00379	0.27	-0.32	0.109	0.161	0.243	0.0418
12301	Q2TAA2	F7EV90	tr|F7EV90|F7EV90_MACMU	IAH1	0.163	0.392	0.121	0.113	0.245	-0.284	-0.368	-0.356	-0.448	-0.105	0.197	0.106	-0.0959	0.00251	-0.376	0.113	-0.364	0	-0.366
10412	Q31612	H9H4X4	tr|H9H4X4|H9H4X4_MACMU		0.431	0.873	-0.00141	-0.0868	0.0875	-0.0849	0.381	0.418	-0.154	-0.121	-0.429	0.207	0.814	0	0.226	-0.133	0.358	0.0873	0.0385
7082	Q32M84	F7HA52	tr|F7HA52|F7HA52_MACMU	BTBD16	NA	NA	NA	NA	NA	NA	NA	NA	0.441	0.243	-0.0176	0.646	0	-0.309	0.754	-0.367	1.34	-0.29	-0.222
3126	Q32MZ4	F7FEY5	tr|F7FEY5|F7FEY5_MACMU	LRRFIP1	NA	NA	NA	NA	NA	NA	NA	NA	-0.0204	0.465	0	0.13	-0.625	-0.194	0.532	NA	NA	NA	NA
10427	Q32P51	Q28521	sp|Q28521|ROA1_MACMU	HNRNPA1L2	0.278	0.906	0.362	0.448	0.375	0.119	-0.606	-0.511	-0.756	0.0207	0	-0.748	-0.273	0.155	0.148	-0.352	-0.179	-0.0915	-0.214
8718	Q3LXA3	F7HN46	tr|F7HN46|F7HN46_MACMU	TKFC	NA	NA	NA	NA	NA	NA	NA	NA	NA	NA	NA	NA	NA	NA	NA	-0.22	-0.172	0.445	0.172
455	Q3V6T2	F6VNU1	tr|F6VNU1|F6VNU1_MACMU	CCDC88A	-1.21	0.492	-0.434	0.16	-0.0486	0.0323	0.138	-0.0323	NA	NA	NA	NA	NA	NA	NA	NA	NA	NA	NA
5389	Q494V2	F6Z4D1	tr|F6Z4D1|F6Z4D1_MACMU	CFAP100	NA	NA	NA	NA	NA	NA	NA	NA	0.743	0.372	0.34	0.348	-0.486	-0.0929	0.0294	-0.294	-1.27	0	-0.326
6151	Q495W5	F6SBQ9	tr|F6SBQ9|F6SBQ9_MACMU	FUT11	-0.185	-0.0456	-0.379	0	-0.0837	0.42	0.0813	0.284	0.399	-0.0333	0.00344	-0.378	0.0358	0.673	-0.377	-0.0533	0.262	-0.0108	0.126
14876	Q496H8	F6RNB5	tr|F6RNB5|F6RNB5_MACMU	NRN1L	0.242	-0.483	0	-0.317	-0.0837	-0.125	0.121	0.313	0.0564	-0.369	0.0778	-0.396	0.13	-0.0304	0.0183	-0.00273	-0.441	0.534	0.445
4268	Q49A17	F7DBP1	tr|F7DBP1|F7DBP1_MACMU	GALNTL6	-0.127	-0.0703	0	-0.436	-0.135	0.0594	0.056	-0.151	0.005	-0.194	0.0836	-0.324	-0.0718	0.284	-0.0386	0.159	0.104	0.0924	0.225
15622	Q4G0I0	F7HK21	tr|F7HK21|F7HK21_MACMU	C16orf91	-0.488	0.548	-0.58	0.763	-0.885	0.1	0.121	-0.457	-0.0277	-0.471	0.0605	-0.172	0	0.222	-0.172	0.207	-0.0684	0.394	0.0787
5576	Q4G0U5	F6TRV3	tr|F6TRV3|F6TRV3_MACMU	CFAP221	NA	NA	NA	NA	NA	NA	NA	NA	NA	NA	NA	NA	NA	NA	NA	0.122	0.0736	-0.0736	-0.136
4702	Q4V328	F7G9A7	tr|F7G9A7|F7G9A7_MACMU	GRIPAP1	0.0771	0.204	-0.263	0.194	-0.428	0.824	-0.812	-0.765	NA	NA	NA	NA	NA	NA	NA	0.176	0.223	-0.0771	-0.342
2105	Q4VCS5	F7CEX6	tr|F7CEX6|F7CEX6_MACMU	AMOT	-0.862	-0.124	-0.0279	-0.0261	0.0261	0.983	0.534	0.676	NA	NA	NA	NA	NA	NA	NA	NA	NA	NA	NA
451	Q4ZHG4	F6YCE1	tr|F6YCE1|F6YCE1_MACMU	FNDC1	0.0365	-0.0537	-0.245	-0.0126	0.0997	0.331	0.131	0	0.0202	-0.168	-0.249	0.199	0.526	-0.0157	0.249	-0.0848	0.257	-0.441	-0.139
3889	Q504Y0	F7GXH0	tr|F7GXH0|F7GXH0_MACMU	SLC39A12	-0.276	-0.0611	0	-0.221	0.00558	1.44	-0.0449	0.191	-0.48	-0.033	0.333	-0.684	0.178	-0.295	-0.156	0.546	0.391	0.392	0.538
7019	Q53EL6	F7HGG8	tr|F7HGG8|F7HGG8_MACMU	PDCD4	NA	NA	NA	NA	NA	NA	NA	NA	NA	NA	NA	NA	NA	NA	NA	-0.284	0.083	-0.083	0.084
1985	Q53EL9	F7F6J3	tr|F7F6J3|F7F6J3_MACMU	SEZ6	-0.214	-0.18	-0.317	0.0293	0.00654	0.0481	0.0426	0	-0.141	-0.131	-0.297	-0.247	0.115	0.235	-0.106	0.0806	-0.04	0.386	0.124
3755	Q53GS7	F6UEL7	tr|F6UEL7|F6UEL7_MACMU	GLE1	-0.13	-0.0982	0.112	-0.306	0.301	-0.176	0.638	0.0982	NA	NA	NA	NA	NA	NA	NA	NA	NA	NA	NA
15615	Q53QV2	F7HKD9	tr|F7HKD9|F7HKD9_MACMU	LBH	NA	NA	NA	NA	NA	NA	NA	NA	NA	NA	NA	NA	NA	NA	NA	-1.91	0.122	0.846	-0.122
7317	Q53RD9	F6W047	tr|F6W047|F6W047_MACMU	FBLN7	NA	NA	NA	NA	NA	NA	NA	NA	0.266	0.117	-0.778	0.401	-0.296	0.0636	0.203	0	-0.172	-0.27	-0.151
10147	Q53RT3	F7DE20	tr|F7DE20|F7DE20_MACMU	ASPRV1	NA	NA	NA	NA	NA	NA	NA	NA	NA	NA	NA	NA	NA	NA	NA	-0.199	0.199	-0.252	0.228
8919	Q562R1	F7D6T8	tr|F7D6T8|F7D6T8_MACMU	ACTBL2	-0.687	-0.156	0.182	0.0827	0.181	0.51	-0.107	0.5	-0.0243	0.247	0.0302	-0.442	0.104	0	0.123	-0.418	-0.717	-0.692	-0.0481
4364	Q569K6	F7HJ61	tr|F7HJ61|F7HJ61_MACMU	CCDC157	NA	NA	NA	NA	NA	NA	NA	NA	NA	NA	NA	NA	NA	NA	NA	-0.259	0.00623	0.087	-0.00623
14835	Q5BIV9	A2BDG6	tr|A2BDG6|A2BDG6_MACMU	SPRN	NA	NA	NA	NA	NA	NA	NA	NA	-0.137	0.242	-0.0151	0.166	-0.0368	-0.0039	0	0.0179	-0.103	0.213	0.0933
12704	Q5BKY9	F7G1V7	tr|F7G1V7|F7G1V7_MACMU	FAM133B	NA	NA	NA	NA	NA	NA	NA	NA	0.507	0	0.113	0.112	-0.185	-0.0242	0.568	-0.064	0.462	-0.609	-0.00358
15869	Q5BLP8	F7GP19	tr|F7GP19|F7GP19_MACMU		0.0658	0.483	-0.403	0.146	-0.14	-0.00906	-0.123	-0.181	0	-0.403	-0.145	0.518	0.0106	0.316	-0.376	-0.213	0.0944	1.07	0.168
7883	Q5DX21	F7H0Z3	tr|F7H0Z3|F7H0Z3_MACMU	IGSF11	0.148	-0.0577	-0.246	-0.147	-0.0758	-0.0959	0	-0.202	0.0793	-0.426	-0.168	0.00653	0.204	0.0937	-0.328	0.21	0.115	0.539	0.0143
1934	Q5FWE3	F7HJU3	tr|F7HJU3|F7HJU3_MACMU	PRRT3	0.236	0.314	-0.307	0.31	0.148	-0.0188	-0.206	-0.0651	-0.000479	-0.236	-0.0304	0.59	-0.00427	0.482	-0.178	0	0.115	0.601	0.00107
12647	Q5H913	F7FSP8	tr|F7FSP8|F7FSP8_MACMU	ARL13A	NA	NA	NA	NA	NA	NA	NA	NA	NA	NA	NA	NA	NA	NA	NA	-0.216	1.08	-0.644	0.216
13539	Q5H9L2	F6XD25	tr|F6XD25|F6XD25_MACMU	TCEAL5	0.879	1.03	0.637	0.787	0.808	-0.476	-0.681	-0.636	NA	NA	NA	NA	NA	NA	NA	0.335	-1.45	-0.335	-0.622
3623	Q5HYW2	F6T4L6	tr|F6T4L6|F6T4L6_MACMU		NA	NA	NA	NA	NA	NA	NA	NA	NA	NA	NA	NA	NA	NA	NA	-0.0393	-0.0521	0.0888	0.0393
829	Q5IJ48	F7HE09	tr|F7HE09|F7HE09_MACMU	CRB2	-0.521	0	-0.0938	-0.00662	-0.0688	0.435	-0.044	-0.0335	0.0215	-0.117	-0.0323	0.276	-0.0464	0.0775	0.0928	0.488	0.33	0.683	0.209
405	Q5JRA6	F6SJ00	tr|F6SJ00|F6SJ00_MACMU	MIA3	0.194	0.194	-0.116	-0.199	0.064	-0.0588	-0.0528	-0.23	0	-0.135	-0.139	0.132	0.106	0.165	-0.135	0.227	0.0623	0.361	-0.0581
9494	Q5JS37	F6UX60	tr|F6UX60|F6UX60_MACMU	NHLRC3	NA	NA	NA	NA	NA	NA	NA	NA	-0.521	-0.0283	-0.0239	0.284	-0.0163	0.0439	0.408	0.151	0	-0.268	0.0493
15834	Q5JTB6	F6VNS0	tr|F6VNS0|F6VNS0_MACMU	PLAC9	0.294	-0.207	-0.186	-0.0149	-0.0672	0.0149	0.118	0.237	NA	NA	NA	NA	NA	NA	NA	NA	NA	NA	NA
2365	Q5JWF2	F6PV18	tr|F6PV18|F6PV18_MACMU	GNAS	NA	NA	NA	NA	NA	NA	NA	NA	0.0778	0.229	0	-0.264	-0.759	-0.582	0.0144	NA	NA	NA	NA
10376	Q5JXA9	F6XMK0	tr|F6XMK0|F6XMK0_MACMU	SIRPB2	-0.174	0.204	0	-0.0186	-0.169	-0.345	0.545	0.337	-0.332	0.235	0.526	0.442	0.136	-0.382	-0.193	0.0111	-0.368	0.6	-0.0104
3229	Q5KU26	F6RUR9	tr|F6RUR9|F6RUR9_MACMU	COLEC12	0.0339	-0.115	-0.0321	-0.115	-0.0519	-0.0471	0.167	0.123	0.17	-0.0948	0.0589	0	-0.227	-0.198	0.095	-0.00966	0.276	0.254	0.052
9760	Q5M9Q1	F7EJZ3	tr|F7EJZ3|F7EJZ3_MACMU	NKAPL	NA	NA	NA	NA	NA	NA	NA	NA	NA	NA	NA	NA	NA	NA	NA	0.394	0.255	-0.314	-0.255
5439	Q5NDL2	F7FWV8	tr|F7FWV8|F7FWV8_MACMU	EOGT	NA	NA	NA	NA	NA	NA	NA	NA	NA	NA	NA	NA	NA	NA	NA	0.0482	-0.0482	0.451	-0.371
2595	Q5R3F8	F6QTS4	tr|F6QTS4|F6QTS4_MACMU	ELFN2	NA	NA	NA	NA	NA	NA	NA	NA	NA	NA	NA	NA	NA	NA	NA	-0.217	0.217	0.471	-0.229
4675	Q5SRH9	F7GSI7	tr|F7GSI7|F7GSI7_MACMU	TTC39A	-0.0331	0.0331	-0.0823	-0.131	0.235	3.61	-0.178	0.918	NA	NA	NA	NA	NA	NA	NA	NA	NA	NA	NA
12607	Q5T013	F7GXQ7	tr|F7GXQ7|F7GXQ7_MACMU	HYI	-0.0226	0.0629	0.0649	0.805	-0.219	-0.243	0.105	-0.196	0.0522	-0.11	-0.05	0.132	-0.0198	-0.38	0.418	0	-0.0737	0.0376	0.0938
156	Q5T1R4	F7FU49	tr|F7FU49|F7FU49_MACMU	HIVEP3	NA	NA	NA	NA	NA	NA	NA	NA	0.35	-0.256	1.24	0.203	-0.149	-0.69	-0.633	0.102	0.251	-0.516	0
15811	Q5T1S8	F6PPE8	tr|F6PPE8|F6PPE8_MACMU	NCMAP	-0.78	-1.16	0.174	-0.587	-0.866	0.469	0.646	0.554	0.407	-0.301	-0.299	-0.515	-0.283	0	0.0924	0.0241	-0.135	0.364	0.469
11195	Q5T4F7	F6S5A2	tr|F6S5A2|F6S5A2_MACMU	SFRP5	NA	NA	NA	NA	NA	NA	NA	NA	NA	NA	NA	NA	NA	NA	NA	-0.293	0.156	0.251	-0.156
898	Q5T5Y3	F7FJY6	tr|F7FJY6|F7FJY6_MACMU	CAMSAP1	-0.62	0.308	0.802	0.2	-2.92	0.458	-0.162	0.309	0.0656	0	0.114	-0.191	-0.183	-0.231	-0.196	NA	NA	NA	NA
4797	Q5T749	F6VH24	tr|F6VH24|F6VH24_MACMU	KPRP	NA	NA	NA	NA	NA	NA	NA	NA	-0.167	-0.13	0.185	0	0.096	-0.291	-0.069	0.416	2.32	-0.373	0.865
7268	Q5T764	H9H393	tr|H9H393|H9H393_MACMU	IFIT1B	0.0396	-0.0129	0.228	-0.173	-0.0603	0.0129	-0.0902	0.182	NA	NA	NA	NA	NA	NA	NA	NA	NA	NA	NA
1076	Q5T848	F7H1N3	tr|F7H1N3|F7H1N3_MACMU	GPR158	0.804	0	-0.195	0.112	0.129	-0.294	-0.338	-0.66	-0.0617	-0.806	0.118	-0.125	0.0629	0.496	-0.127	0.0428	0.0505	0.406	-0.0192
11955	Q5T9Z0	F6WLW7	tr|F6WLW7|F6WLW7_MACMU	TEDDM1	NA	NA	NA	NA	NA	NA	NA	NA	NA	NA	NA	NA	NA	NA	NA	-0.848	0.379	0.157	-0.157
8494	Q5TDH0	F7GNT7	tr|F7GNT7|F7GNT7_MACMU	DDI2	NA	NA	NA	NA	NA	NA	NA	NA	NA	NA	NA	NA	NA	NA	NA	0.45	0.16	-0.376	-0.16
4562	Q5TEJ8	F7EYF7	tr|F7EYF7|F7EYF7_MACMU	THEMIS2	NA	NA	NA	NA	NA	NA	NA	NA	-0.00951	0.00154	0.186	0	0.205	-0.578	-0.542	NA	NA	NA	NA
8409	Q5U4P2	F6XWV3	tr|F6XWV3|F6XWV3_MACMU	ASPHD1	0.311	0.0163	-0.0234	-0.0163	-0.0358	0.666	-0.0512	0.0455	NA	NA	NA	NA	NA	NA	NA	NA	NA	NA	NA
12186	Q5UCC4	F6ZNT1	tr|F6ZNT1|F6ZNT1_MACMU	EMC10	NA	NA	NA	NA	NA	NA	NA	NA	NA	NA	NA	NA	NA	NA	NA	-0.00233	-0.212	0.363	0.00233
11323	Q5VSG8	F7HT68	tr|F7HT68|F7HT68_MACMU	MANEAL	0.311	-0.374	-0.0142	-0.243	0.302	-0.322	0	-0.0385	0.0589	-0.256	0.25	-0.519	0.39	0.31	-0.649	-0.182	0.323	0.106	0.18
5	Q5VST9	F7CQP1	tr|F7CQP1|F7CQP1_MACMU	OBSCN	NA	NA	NA	NA	NA	NA	NA	NA	NA	NA	NA	NA	NA	NA	NA	-0.96	-0.0702	0.0702	0.154
5527	Q5VTE6	F7H9Y1	tr|F7H9Y1|F7H9Y1_MACMU	ANGEL2	NA	NA	NA	NA	NA	NA	NA	NA	-0.338	-0.946	1.09	-0.356	1.6	-0.954	0.228	0.383	1.2	-0.387	0
4836	Q5VTL7	F6QP66	tr|F6QP66|F6QP66_MACMU	FNDC7	NA	NA	NA	NA	NA	NA	NA	NA	NA	NA	NA	NA	NA	NA	NA	-0.665	0.118	0.464	-0.118
15762	Q5VU69	F7GRW7	tr|F7GRW7|F7GRW7_MACMU	C1orf189	NA	NA	NA	NA	NA	NA	NA	NA	0.721	-0.731	1.17	0	-0.771	-1.04	0.483	NA	NA	NA	NA
1028	Q5VU97	F6SSN2	tr|F6SSN2|F6SSN2_MACMU	CACHD1	0	-0.136	0.0785	-0.386	0.0675	0.000813	-0.0302	-0.0864	0.276	-0.105	-0.0165	-0.116	-0.0862	0.0695	-0.161	0.278	0.484	0.33	0.373
2565	Q5VV43	F6T9R2	tr|F6T9R2|F6T9R2_MACMU	KIAA0319	0.808	-0.778	-0.179	0.137	0.276	-0.012	0.375	0.332	-0.252	0.0761	-0.0657	0.599	0	0.419	0.208	-0.234	-0.458	-0.199	-0.555
647	Q5VV63	F7FWX9	tr|F7FWX9|F7FWX9_MACMU	ATRNL1	0.38	0.448	0.228	-0.138	-0.316	0.0327	-0.0327	-0.841	NA	NA	NA	NA	NA	NA	NA	NA	NA	NA	NA
9577	Q5VVQ6	F6XIA9	tr|F6XIA9|F6XIA9_MACMU	YOD1	NA	NA	NA	NA	NA	NA	NA	NA	NA	NA	NA	NA	NA	NA	NA	-0.238	0.238	-0.441	0.264
3102	Q5VWG9	F6ZUQ4	tr|F6ZUQ4|F6ZUQ4_MACMU	TAF3	NA	NA	NA	NA	NA	NA	NA	NA	0.0703	0	-0.473	0.144	-0.567	-0.661	0.328	NA	NA	NA	NA
7515	Q5VWP3	F7EI76	tr|F7EI76|F7EI76_MACMU	MLIP	-0.123	-0.139	0.0208	-0.0208	0.217	0.0947	0.199	-0.444	NA	NA	NA	NA	NA	NA	NA	NA	NA	NA	NA
1132	Q5VY43	F6UBW6	tr|F6UBW6|F6UBW6_MACMU	PEAR1	-0.495	0.064	-0.221	-0.199	-0.296	-0.252	0.0624	-0.0624	NA	NA	NA	NA	NA	NA	NA	0.277	0.325	0.305	0.341
6710	Q5VZB9	F7HST0	tr|F7HST0|F7HST0_MACMU	DMRTA1	0.871	0.432	-0.725	1.1	-0.636	-0.405	0.982	-0.624	NA	NA	NA	NA	NA	NA	NA	-0.0548	0.483	-0.225	0.0548
9010	Q5VZM2	F7D021	tr|F7D021|F7D021_MACMU	RRAGB	NA	NA	NA	NA	NA	NA	NA	NA	NA	NA	NA	NA	NA	NA	NA	0.0943	-0.0943	0.862	-0.131
5812	Q5ZPR3	F7G5V3	tr|F7G5V3|F7G5V3_MACMU	CD276	-0.287	-0.432	0	0.0998	-0.055	0.401	0.234	0.192	0.0565	-0.536	-0.0619	-0.416	0.637	-0.096	0.864	NA	NA	NA	NA
1560	Q63HQ2	F7GZ28	tr|F7GZ28|F7GZ28_MACMU	EGFLAM	0.0562	-0.124	-0.0931	-0.172	-0.0859	0.0404	0	-0.0106	0.161	-0.00955	-0.224	-0.33	0.181	0.0461	0.162	0.278	0.679	-0.261	0.265
689	Q63HR2	F6YU76	tr|F6YU76|F6YU76_MACMU	TNS2	-0.217	0.0905	-0.0732	-0.38	0.298	0.307	0.0732	-0.14	NA	NA	NA	NA	NA	NA	NA	NA	NA	NA	NA
12131	Q641Q3	F6PVD2	tr|F6PVD2|F6PVD2_MACMU	METRNL	-0.0984	-0.244	-0.114	-0.17	-0.224	0.0847	0	0.167	-0.103	-0.066	0.00441	-0.259	0.142	0.0464	-0.142	0.472	0.171	0.292	0.0197
5959	Q643R3	F7H2G9	tr|F7H2G9|F7H2G9_MACMU	LPCAT4	0.0199	-0.123	0.0164	-0.115	0.284	-0.0431	0.168	-0.0164	NA	NA	NA	NA	NA	NA	NA	NA	NA	NA	NA
4795	Q658N2	F6QL12	tr|F6QL12|F6QL12_MACMU	WSCD1	0.0482	-0.428	-0.167	-0.218	-0.23	-0.0577	0.271	0.165	0.00671	-0.125	-0.439	-0.185	0	0.0796	0.141	-0.228	0.212	0.226	0.232
1568	Q66K74	F7GCT2	tr|F7GCT2|F7GCT2_MACMU	MAP1S	NA	NA	NA	NA	NA	NA	NA	NA	0.582	0.479	0.0776	0	0.153	0.154	-0.777	-0.194	-0.996	-0.112	-1.11
13188	Q66PJ3	F7AKY6	tr|F7AKY6|F7AKY6_MACMU	ARL6IP4	-0.965	0.546	0.334	0.225	-0.608	0.655	-1.16	-0.225	NA	NA	NA	NA	NA	NA	NA	NA	NA	NA	NA
3764	Q674X7	F6UZD0	tr|F6UZD0|F6UZD0_MACMU	KAZN	NA	NA	NA	NA	NA	NA	NA	NA	NA	NA	NA	NA	NA	NA	NA	-0.112	-0.418	0.112	0.342
3289	Q68BL8	F6V8S1	tr|F6V8S1|F6V8S1_MACMU	OLFML2B	-0.38	-0.401	-0.0509	-0.488	0.0683	-0.343	0.0702	0.185	0.293	0	-0.411	-0.107	0.165	-0.0915	0.0581	0.00353	0.131	-0.249	0.0372
5044	Q68CZ6	F6RPM9	tr|F6RPM9|F6RPM9_MACMU	HAUS3	NA	NA	NA	NA	NA	NA	NA	NA	NA	NA	NA	NA	NA	NA	NA	-0.462	0.0521	0.115	-0.0521
135	Q68DK2	F7C1L5	tr|F7C1L5|F7C1L5_MACMU	ZFYVE26	0.214	-0.0852	-0.375	0	-0.414	-0.257	-0.0143	-0.3	0.281	0.0868	-0.533	0.269	-0.151	0.536	-0.314	0.0643	0.333	0.893	0.0109
7472	Q68DU8	F6VK58	tr|F6VK58|F6VK58_MACMU	KCTD16	0.278	0.346	0.458	0.541	0.063	-0.0795	0.0202	0	-0.121	0.289	-0.149	0.43	-0.0218	0.05	-0.378	-0.401	-0.127	-0.052	-0.138
7056	Q6A163	F7GFM5	tr|F7GFM5|F7GFM5_MACMU	KRT39	1.25	0.0792	0.356	-0.427	-0.0792	-1.13	0.113	-0.365	NA	NA	NA	NA	NA	NA	NA	NA	NA	NA	NA
882	Q6BDS2	F7EWB6	tr|F7EWB6|F7EWB6_MACMU	UHRF1BP1	-0.371	-0.0296	0.0296	-0.583	0.0701	-0.172	0.389	0.504	NA	NA	NA	NA	NA	NA	NA	NA	NA	NA	NA
2372	Q6EKJ0	H9H3X1	tr|H9H3X1|H9H3X1_MACMU	GTF2IRD2B	NA	NA	NA	NA	NA	NA	NA	NA	NA	NA	NA	NA	NA	NA	NA	-0.07	0.143	-0.31	0.07
10789	Q6EMK4	F7H972	tr|F7H972|F7H972_MACMU	VASN	-0.0338	0.212	-0.0982	0.0136	-0.0828	0.132	-0.00466	-0.012	-0.0471	-0.139	0.253	0.439	-0.104	0.234	-0.12	0	0.0614	0.216	0.198
9347	Q6FHJ7	Q7YRN1	sp|Q7YRN1|SFRP4_MACMU	SFRP4	-0.1	-0.165	0.0431	-0.488	-0.13	0.283	-0.138	0.108	-0.122	-0.393	0.356	-0.362	0.286	0	0.0762	0.436	0.636	-0.865	0.702
10470	Q6GTS8	F6TBC8	tr|F6TBC8|F6TBC8_MACMU	PM20D1	0.717	-0.153	0.104	0.232	-0.244	0.338	-0.54	-0.745	0.179	-0.0788	0.325	-0.335	0	0.446	0.0519	0.93	-0.0642	-0.187	-0.492
12723	Q6GTX8	F6UQP6	tr|F6UQP6|F6UQP6_MACMU	LAIR1	0.551	1.41	0.636	-0.0335	-0.189	-0.257	-1.02	-0.448	-0.0488	-0.221	0.481	0.867	0.215	0.105	-0.758	0.751	0	-1.53	0.712
1826	Q6IEE7	F7HTF9	tr|F7HTF9|F7HTF9_MACMU	TMEM132E	-0.314	-0.00346	-0.0679	0.0705	-0.0497	0	0.375	0.372	-0.0712	0.0672	-0.166	0.164	-0.245	-0.0021	0.0147	-0.159	0.2	0.458	0.0644
1256	Q6IQ32	F6S545	tr|F6S545|F6S545_MACMU	ADNP2	NA	NA	NA	NA	NA	NA	NA	NA	-0.124	0.107	-0.362	0.323	0	-0.343	0.302	NA	NA	NA	NA
8568	Q6J9G0	F6SCK6	tr|F6SCK6|F6SCK6_MACMU	STYK1	-1.94	-0.308	0.329	0.0529	-0.188	1.73	-0.0529	1.2	NA	NA	NA	NA	NA	NA	NA	NA	NA	NA	NA
8381	Q6JBY9	F7E4L3	tr|F7E4L3|F7E4L3_MACMU	RCSD1	-0.117	-0.315	0.478	-0.206	0.166	0.208	-0.149	0.117	NA	NA	NA	NA	NA	NA	NA	NA	NA	NA	NA
1804	Q6JQN1	F6RZE6	tr|F6RZE6|F6RZE6_MACMU	ACAD10	NA	NA	NA	NA	NA	NA	NA	NA	-0.0892	0	-0.0777	0.0117	-0.683	0.501	0.0935	NA	NA	NA	NA
97	Q6KC79	F6XIX8	tr|F6XIX8|F6XIX8_MACMU	NIPBL	-1.68	0.111	0.156	0.405	-0.168	0.346	-0.852	-0.111	NA	NA	NA	NA	NA	NA	NA	NA	NA	NA	NA
2496	Q6MZW2	F7BX29	tr|F7BX29|F7BX29_MACMU	FSTL4	0.35	-0.0631	-0.401	-0.19	0.265	0	0.0709	-0.0871	0.196	-0.141	-0.225	-0.0363	0.151	0.289	-0.0338	-0.0473	0.248	0.243	0.33
7902	Q6NUI6	F7AMD3	tr|F7AMD3|F7AMD3_MACMU	CHADL	NA	NA	NA	NA	NA	NA	NA	NA	NA	NA	NA	NA	NA	NA	NA	-0.0108	0.00143	0.0172	-0.00143
13741	Q6NUJ2	F7E0Q9	tr|F7E0Q9|F7E0Q9_MACMU	C11orf87	-0.00343	-0.00271	0	0.112	0.108	0.519	0.192	0.828	0.0184	0.266	-0.286	-0.259	-0.0767	0.318	-0.0293	-0.138	0.285	-0.0782	-0.272
8873	Q6NVY1	F7FC26	tr|F7FC26|F7FC26_MACMU	HIBCH	NA	NA	NA	NA	NA	NA	NA	NA	-0.204	-0.285	0	0.0594	0.259	-0.317	0.547	0.466	-0.261	0.0699	-0.56
7609	Q6NW40	F7CBY1	tr|F7CBY1|F7CBY1_MACMU	RGMB	0.0142	0	-0.193	-0.0921	-0.039	0.125	-0.0124	-0.118	0.169	-0.0817	-0.137	0.153	-0.0746	0.423	0.032	-0.166	0.116	0.735	0.481
5999	Q6NX45	F7GKL7	tr|F7GKL7|F7GKL7_MACMU	ZNF774	NA	NA	NA	NA	NA	NA	NA	NA	NA	NA	NA	NA	NA	NA	NA	0.208	-0.135	0.135	-0.614
7253	Q6NXE6	F7CMV1	tr|F7CMV1|F7CMV1_MACMU	ARMC6	0.00827	-0.00827	-0.0507	-0.134	0.107	-0.126	0.203	0.362	NA	NA	NA	NA	NA	NA	NA	NA	NA	NA	NA
9723	Q6NZI2	F7HJ72	tr|F7HJ72|F7HJ72_MACMU	PTRF	0.211	0.401	-0.114	0.462	-0.385	0.0586	-0.0586	-0.374	NA	NA	NA	NA	NA	NA	NA	NA	NA	NA	NA
1432	Q6P0N0	F6WJY1	tr|F6WJY1|F6WJY1_MACMU	MIS18BP1	-0.171	0.0069	0.215	-0.16	-0.225	-0.0069	0.313	0.0819	NA	NA	NA	NA	NA	NA	NA	NA	NA	NA	NA
6377	Q6P1A2	F6SI36	tr|F6SI36|F6SI36_MACMU	LPCAT3	NA	NA	NA	NA	NA	NA	NA	NA	NA	NA	NA	NA	NA	NA	NA	4.55e-05	-0.0307	-4.55e-05	0.506
8777	Q6P1Q9	F6XTE0	tr|F6XTE0|F6XTE0_MACMU	METTL2B	NA	NA	NA	NA	NA	NA	NA	NA	NA	NA	NA	NA	NA	NA	NA	-1.03	-0.459	1.13	0.459
1008	Q6P1X5	F7GSG6	tr|F7GSG6|F7GSG6_MACMU	TAF2	NA	NA	NA	NA	NA	NA	NA	NA	NA	NA	NA	NA	NA	NA	NA	-0.433	0.513	-1.04	0.433
10716	Q6P2I3	F6T4J4	tr|F6T4J4|F6T4J4_MACMU	FAHD2B	0.558	-0.113	0.211	0.378	-0.313	0.173	-0.447	0.104	-0.641	0.626	0.351	-0.137	0.148	-0.000541	0	0.258	-0.43	-0.0396	-0.367
5492	Q6P4A8	F6TC57	tr|F6TC57|F6TC57_MACMU	PLBD1	NA	NA	NA	NA	NA	NA	NA	NA	0.0872	-0.255	0.187	-0.16	0.115	0	-0.164	NA	NA	NA	NA
7816	Q6P4E1	F7H3W8	tr|F7H3W8|F7H3W8_MACMU	CASC4	0.385	0.0488	-0.126	0.279	-0.031	-0.201	-0.119	-0.31	0.18	-0.159	-0.205	0.213	0.151	0.0672	-0.276	-0.285	0.15	0.27	0
7078	Q6P4F1	F6S9A3	tr|F6S9A3|F6S9A3_MACMU	FUT10	NA	NA	NA	NA	NA	NA	NA	NA	NA	NA	NA	NA	NA	NA	NA	-0.971	0.601	-0.601	1.41
6107	Q6P988	F6ZKQ5	tr|F6ZKQ5|F6ZKQ5_MACMU	NOTUM	NA	NA	NA	NA	NA	NA	NA	NA	-0.258	-0.0632	0	0.163	0.541	-0.251	-0.367	0.594	-0.122	0.476	0.117
5569	Q6P9A2	F6SLD3	tr|F6SLD3|F6SLD3_MACMU	GALNT18	0.312	0.0414	-0.316	0.103	0.147	-0.101	-0.129	-0.477	-0.00191	0.107	-0.156	-0.126	0.089	0.21	-0.12	0	-0.027	0.29	0.188
7966	Q6PCB0	F6Z5F9	tr|F6Z5F9|F6Z5F9_MACMU	VWA1	-0.213	0.133	-0.185	-0.173	-0.0956	0.0921	-0.00313	0.00668	0.0872	-0.054	-0.0244	0.00283	0.0267	-0.125	0	0.517	0.187	0.089	-0.0731
6936	Q6PII3	F6WDN2	tr|F6WDN2|F6WDN2_MACMU	CCDC174	NA	NA	NA	NA	NA	NA	NA	NA	NA	NA	NA	NA	NA	NA	NA	-0.45	0.842	-0.573	0.45
10544	Q6PK18	F6QPC2	tr|F6QPC2|F6QPC2_MACMU	OGFOD3	-0.302	0	-0.208	-0.299	0.131	-0.168	0.467	0.452	0.0238	-0.72	1.23	-0.332	0.101	0.144	-0.354	-0.0711	0.0972	-0.0502	0.108
7296	Q6PML9	F7G8L3	tr|F7G8L3|F7G8L3_MACMU	SLC30A9	NA	NA	NA	NA	NA	NA	NA	NA	0.916	0.667	-0.205	-0.0824	-1.34	0	0.483	NA	NA	NA	NA
15144	Q6PUV4	F7A9H1	tr|F7A9H1|F7A9H1_MACMU	CPLX2	0.33	0	0.157	0.0612	-0.012	0.0733	-0.127	-0.0566	-0.513	-0.223	0.448	0.248	0.189	0.127	0.487	-0.33	-0.0805	-0.0753	-0.407
869	Q6R2W3	F6Q028	tr|F6Q028|F6Q028_MACMU	ZBED9	NA	NA	NA	NA	NA	NA	NA	NA	-0.206	0.0271	-0.417	-0.171	0.52	0.0995	0	NA	NA	NA	NA
6533	Q6STE5	F7H1V4	tr|F7H1V4|F7H1V4_MACMU	SMARCD3	0.0043	-0.0283	-0.0138	-0.695	0.187	-0.0043	0.874	0.466	NA	NA	NA	NA	NA	NA	NA	NA	NA	NA	NA
3433	Q6SZW1	F6UL84	tr|F6UL84|F6UL84_MACMU	SARM1	NA	NA	NA	NA	NA	NA	NA	NA	NA	NA	NA	NA	NA	NA	NA	-0.133	0.428	-1.47	0.133
3713	Q6TDU7	F6SGY4	tr|F6SGY4|F6SGY4_MACMU	CASC1	NA	NA	NA	NA	NA	NA	NA	NA	NA	NA	NA	NA	NA	NA	NA	-0.754	0.294	-0.0388	0.0388
257	Q6UB98	F7HLY4	tr|F7HLY4|F7HLY4_MACMU	ANKRD12	-0.377	-0.427	0.379	-0.814	0.0458	0.15	0.344	-0.0458	NA	NA	NA	NA	NA	NA	NA	NA	NA	NA	NA
126	Q6UB99	F7H0T3	tr|F7H0T3|F7H0T3_MACMU	ANKRD11	NA	NA	NA	NA	NA	NA	NA	NA	NA	NA	NA	NA	NA	NA	NA	0.276	-0.276	-0.312	0.778
218	Q6UVK1	F7GL19	tr|F7GL19|F7GL19_MACMU	CSPG4	-0.113	-0.0264	-0.0156	-0.025	0.108	-0.0439	0.0909	-0.058	0.24	-0.189	-0.118	0.29	0.052	0.0554	-0.0152	0.147	0.0426	0.271	0
13396	Q6UW01	F6YMC1	tr|F6YMC1|F6YMC1_MACMU	CBLN3	-0.248	-0.383	-0.355	0.00926	0.016	-0.0321	-0.0833	0.0457	0.218	-0.0465	-0.396	-0.000643	0.0694	0.175	0.103	0	0.319	0.0123	-0.107
16039	Q6UW78	F6SE25	tr|F6SE25|F6SE25_MACMU	UQCC3	0	-0.239	-0.488	-0.349	-0.42	-0.178	0.0232	-0.13	0.2	-0.181	-0.36	0.0459	0.133	0.142	-0.276	0.162	0.248	0.587	0.0701
13770	Q6UWH6	F6WI01	tr|F6WI01|F6WI01_MACMU	TEX261	-0.0723	-0.185	-0.0767	0.228	0.248	-0.009	0.384	0.009	NA	NA	NA	NA	NA	NA	NA	NA	NA	NA	NA
11273	Q6UWI2	F7GKZ0	tr|F7GKZ0|F7GKZ0_MACMU	PARM1	0	0.0213	-0.0291	-0.592	0.257	-0.481	0.422	-0.449	0.238	-0.0356	-0.524	0.616	-0.305	-0.557	0.0852	-0.32	0.126	0.0552	0.22
10925	Q6UWI4	F6WJM3	tr|F6WJM3|F6WJM3_MACMU	SHISA2	NA	NA	NA	NA	NA	NA	NA	NA	NA	NA	NA	NA	NA	NA	NA	-0.611	0.115	0.425	-0.115
5244	Q6UWJ1	H9H4Y4	tr|H9H4Y4|H9H4Y4_MACMU	TMCO3	NA	NA	NA	NA	NA	NA	NA	NA	NA	NA	NA	NA	NA	NA	NA	-0.264	0.54	-0.672	0.264
12209	Q6UWP2	F6Y1E5	tr|F6Y1E5|F6Y1E5_MACMU	DHRS11	NA	NA	NA	NA	NA	NA	NA	NA	-0.613	-0.203	0	0.381	0.363	-0.632	0.262	0.769	-0.441	0.0789	-0.033
7474	Q6UWR7	F7AIZ5	tr|F7AIZ5|F7AIZ5_MACMU	ENPP6	0.0247	-0.057	0	-0.323	-0.098	-0.0283	0.242	-0.154	0.238	-0.0638	0.0643	-0.31	-0.221	-0.128	0.0958	0.119	0.0834	0.0862	0.481
8296	Q6UWY5	F7AXM5	tr|F7AXM5|F7AXM5_MACMU	OLFML1	NA	NA	NA	NA	NA	NA	NA	NA	-0.276	-0.42	0.117	0.14	0.709	-0.164	0	-0.193	-0.247	0.0825	0.852
5628	Q6UX71	F6SH47	tr|F6SH47|F6SH47_MACMU	PLXDC2	0.0576	0.467	0.152	0.067	0	-0.258	-0.574	-0.312	-0.227	-0.358	0.327	-0.0102	-0.0709	0.18	-0.254	-0.00978	0.14	0.735	0.178
15423	Q6UXB2	F7EWH0	tr|F7EWH0|F7EWH0_MACMU	CXCL17	NA	NA	NA	NA	NA	NA	NA	NA	0.398	-0.988	1.29	1.4	-0.286	-0.438	0	NA	NA	NA	NA
7243	Q6UXB8	F6RSK7	tr|F6RSK7|F6RSK7_MACMU	PI16	0.0145	-0.254	0.0537	-0.499	-0.301	-0.2	-0.0362	0	0.421	-0.304	0.163	-0.379	-0.219	-0.148	0.0958	0.26	0.478	0.142	0.378
6440	Q6UXD5	F6XX70	tr|F6XX70|F6XX70_MACMU	SEZ6L2	0.134	0.214	-0.113	0.0917	0.132	0.106	0	-0.0784	-0.195	-0.223	-0.212	0.141	0.0843	0.00922	-0.0844	-0.153	-0.0158	0.407	-0.0161
5386	Q6UXF1	F7GTM0	tr|F7GTM0|F7GTM0_MACMU	TMEM108	-0.606	0.0389	-0.198	0.109	-0.311	0.395	-0.426	-0.0996	-0.34	-0.582	0	0.0973	-0.556	0.43	-0.314	0.123	0.0105	0.825	0.077
6764	Q6UXF7	F6RY13	tr|F6RY13|F6RY13_MACMU	CLEC18B	-0.417	-0.235	0.19	-0.0128	0.0128	-0.15	0.505	0.398	NA	NA	NA	NA	NA	NA	NA	NA	NA	NA	NA
3168	Q6UXH9	F6ZDE4	tr|F6ZDE4|F6ZDE4_MACMU	PAMR1	-0.154	-0.212	-0.0232	-0.188	-0.101	0.3	-0.155	0.0486	0.0205	0.0981	-0.161	-0.194	0.678	-0.33	0	0.264	0.332	0.147	0.063
3240	Q6UXK2	F7GQX3	tr|F7GQX3|F7GQX3_MACMU	ISLR2	0.000612	0.123	-0.136	0.0481	-0.15	0.234	-0.167	-0.134	-0.0526	-0.133	-0.00822	0.359	0.35	0.391	-0.436	-0.365	0	0.618	0.0913
3499	Q6UXK5	F6R6D9	tr|F6R6D9|F6R6D9_MACMU	LRRN1	0.0251	-0.0887	0	0.0393	-0.0313	-0.159	-0.15	-0.21	0.05	-0.279	0.0368	-0.111	-0.143	0.0242	0.0301	-0.016	0.313	0.31	0.0459
1908	Q6UXZ4	F7BCW0	tr|F7BCW0|F7BCW0_MACMU	UNC5D	0.214	0.123	-0.316	0.0235	0	-0.266	-0.172	-0.112	-0.235	0.0174	-0.311	0.144	0.0923	-0.282	0.114	-0.0121	0.588	0.376	-0.312
7766	Q6UY11	F7G7Y2	tr|F7G7Y2|F7G7Y2_MACMU	DLK2	-0.0277	0.127	-0.774	-0.0953	0.0277	-0.0827	-0.319	-0.245	NA	NA	NA	NA	NA	NA	NA	0.0602	0.24	0.928	0.341
1537	Q6UY14	F7BLA5	tr|F7BLA5|F7BLA5_MACMU	ADAMTSL4	-0.0503	0	-0.0619	-0.138	-0.251	0.846	-0.0534	0.441	0.328	-0.147	0.225	0.142	0.256	-0.106	0.174	-0.0855	-0.0825	0.137	0.0762
9944	Q6VEQ5	F7GYF4	tr|F7GYF4|F7GYF4_MACMU		NA	NA	NA	NA	NA	NA	NA	NA	0	-0.0667	0.125	-0.115	-0.422	0.0214	0.31	NA	NA	NA	NA
8376	Q6XQN6	F7GRT0	tr|F7GRT0|F7GRT0_MACMU	NAPRT	NA	NA	NA	NA	NA	NA	NA	NA	-0.0529	-0.0261	0.146	-0.129	0.221	0	0.223	0.602	0.373	-0.245	-0.536
782	Q6YHK3	F7E0W5	tr|F7E0W5|F7E0W5_MACMU	CD109	0.352	0.106	0.279	-0.229	-0.0842	-0.347	0.501	-0.00254	0.341	0.346	-0.252	0.498	-0.00483	-0.216	-0.132	0	-0.0233	0.275	0.0851
5444	Q6ZMI3	F6ULJ2	tr|F6ULJ2|F6ULJ2_MACMU	GLDN	-0.132	-0.00141	0.293	-0.179	0.0858	-0.101	-0.105	-0.0274	0.113	-0.0231	0.546	-0.239	0.416	0.229	-0.122	0	0.248	0.02	0.00733
4945	Q6ZMP0	F7B086	tr|F7B086|F7B086_MACMU	THSD4	NA	NA	NA	NA	NA	NA	NA	NA	0.401	-0.256	-0.0803	-0.0859	0.278	0	0.423	NA	NA	NA	NA
4876	Q6ZN66	F6RNS5	tr|F6RNS5|F6RNS5_MACMU	GBP6	NA	NA	NA	NA	NA	NA	NA	NA	0.14	-0.241	0	0.0091	0.298	0.321	-0.0214	-0.343	-1.75	-0.0606	0.00524
7299	Q6ZN84	F7H7V4	tr|F7H7V4|F7H7V4_MACMU	CCDC81	-0.667	0.0569	-0.271	0.436	-0.11	-0.0392	0.0392	0.534	NA	NA	NA	NA	NA	NA	NA	NA	NA	NA	NA
5592	Q6ZNA5	F7G2H2	tr|F7G2H2|F7G2H2_MACMU	FRRS1	1.2	-0.386	0.11	-0.167	3.16	-0.61	2.41	-0.11	NA	NA	NA	NA	NA	NA	NA	NA	NA	NA	NA
5860	Q6ZRI8	F6TRV8	tr|F6TRV8|F6TRV8_MACMU	ARHGAP36	0.0851	-0.424	-0.0957	-0.238	-0.442	0.167	-0.133	0.0217	-0.146	0.0759	-0.192	-0.263	0.416	0.338	-0.0285	0.0275	0	0.24	0.0326
6527	Q6ZRP7	F7AGY8	tr|F7AGY8|F7AGY8_MACMU	QSOX2	0.124	-0.181	-0.454	0.18	-0.165	-0.21	0.0594	-0.123	0.129	0	-0.456	0.296	-0.0925	0.539	-0.308	-0.192	0.106	0.351	0.0558
2885	Q6ZSS7	F7FBJ5	tr|F7FBJ5|F7FBJ5_MACMU	MFSD6	-0.433	-0.491	0.00171	0.116	-0.51	0	-0.0594	0.187	0.471	-0.0371	0.361	0.0303	-1.52	0.0206	0.489	-0.32	-0.172	0.0413	-0.462
3377	Q6ZVF9	F7CD06	tr|F7CD06|F7CD06_MACMU	GPRIN3	0.264	-0.349	0.023	0.566	0.219	-0.023	-0.263	-0.211	NA	NA	NA	NA	NA	NA	NA	NA	NA	NA	NA
1365	Q6ZVL6	F7HE95	tr|F7HE95|F7HE95_MACMU	KIAA1549L	0.0726	0.393	-0.16	0.17	0.144	-0.126	0	-0.182	-0.292	0.363	-0.309	0.698	0.341	-0.123	-0.281	-0.24	0.0415	0.563	-0.135
6273	Q6ZVM7	F7ED56	tr|F7ED56|F7ED56_MACMU	TOM1L2	-0.13	-0.14	-0.0888	-0.101	-0.0322	2.01	0	0.0929	-0.2	0.0752	0.373	0.529	0.523	0.291	-0.0251	-0.946	-0.731	0.0956	0.818
3805	Q6ZWH5	F6S2I7	tr|F6S2I7|F6S2I7_MACMU	NEK10	NA	NA	NA	NA	NA	NA	NA	NA	-0.0277	-0.178	-0.124	0.109	-0.273	0.293	-0.409	0.206	0	0.617	0.0998
46	Q709C8	F7D6M1	tr|F7D6M1|F7D6M1_MACMU	VPS13C	-0.563	0.0162	-0.0852	0.0537	-0.372	0.224	0.234	0.278	-0.0876	-0.144	-0.192	-0.331	0	0.227	-0.262	0.0537	-0.183	1.03	0.265
15187	Q71DI3	F7BDT0	tr|F7BDT0|F7BDT0_MACMU	HIST2H3A	-0.109	-0.47	-0.113	0.107	0.325	0.355	-0.107	0.76	NA	NA	NA	NA	NA	NA	NA	NA	NA	NA	NA
186	Q71F56	F7FWX5	tr|F7FWX5|F7FWX5_MACMU	MED13L	0.142	-0.00441	0.148	0.114	-0.178	0.00441	-0.17	-0.615	NA	NA	NA	NA	NA	NA	NA	NA	NA	NA	NA
3494	Q765P7	F6U0I0	tr|F6U0I0|F6U0I0_MACMU	MTSS1L	-0.572	-0.13	0.133	0.13	-0.343	0.487	-0.429	0.279	NA	NA	NA	NA	NA	NA	NA	-0.613	-0.438	0.887	0.498
2786	Q76KP1	F7E742	tr|F7E742|F7E742_MACMU	B4GALNT4	NA	NA	NA	NA	NA	NA	NA	NA	0.0374	0	-0.138	-0.0271	-0.112	0.0325	-0.213	-0.0569	0.241	0.446	0.104
1952	Q76M96	F6V848	tr|F6V848|F6V848_MACMU	CCDC80	-0.273	-0.0315	-0.0459	0.0709	0	0.0774	-0.123	0.113	0.065	0.386	-0.0593	0.107	-0.101	-0.278	-0.164	-0.158	0.31	0.227	0.135
7510	Q7KYR7	F6S110	tr|F6S110|F6S110_MACMU	BTN2A1	0.346	0.138	-0.118	-0.145	-0.117	0.109	0.142	-0.109	NA	NA	NA	NA	NA	NA	NA	NA	NA	NA	NA
456	Q7KZ85	F6RDZ4	tr|F6RDZ4|F6RDZ4_MACMU	SUPT6H	NA	NA	NA	NA	NA	NA	NA	NA	0.781	0.344	-0.193	1.31	-0.585	-0.652	0	NA	NA	NA	NA
2134	Q7KZF4	F6Q3Q6	tr|F6Q3Q6|F6Q3Q6_MACMU	SND1	NA	NA	NA	NA	NA	NA	NA	NA	NA	NA	NA	NA	NA	NA	NA	-0.191	0.00923	-0.00923	0.0942
3275	Q7L0J3	F7FGU8	tr|F7FGU8|F7FGU8_MACMU	SV2A	NA	NA	NA	NA	NA	NA	NA	NA	NA	NA	NA	NA	NA	NA	NA	-0.157	0.157	0.354	-0.173
2838	Q7L0X0	F6WTX8	tr|F6WTX8|F6WTX8_MACMU	TRIL	NA	NA	NA	NA	NA	NA	NA	NA	-0.908	-0.327	0.446	-0.262	-0.0418	1.07	-0.613	0	0.498	0.452	0.309
3571	Q7L1I2	F6VJM4	tr|F6VJM4|F6VJM4_MACMU	SV2B	NA	NA	NA	NA	NA	NA	NA	NA	NA	NA	NA	NA	NA	NA	NA	-0.288	0.0586	0.497	-0.0586
7355	Q7L1S5	F7HNA4	tr|F7HNA4|F7HNA4_MACMU	CHST9	NA	NA	NA	NA	NA	NA	NA	NA	0	0.11	-0.0395	0.000718	-0.266	-0.501	0.23	NA	NA	NA	NA
1070	Q7L576	F7H5L4	tr|F7H5L4|F7H5L4_MACMU	CYFIP1	NA	NA	NA	NA	NA	NA	NA	NA	0.56	-1.97	0.335	0	-0.0664	-0.332	-0.0526	0.677	0.327	-0.363	0.354
10344	Q7L5N1	F6YPF9	tr|F6YPF9|F6YPF9_MACMU	COPS6	0.2	-0.0397	-0.0253	0.364	0.0794	0.107	-0.0657	-0.117	NA	NA	NA	NA	NA	NA	NA	0.0253	-0.0855	0.383	-0.191
427	Q7LBC6	F6YRB3	tr|F6YRB3|F6YRB3_MACMU	KDM3B	NA	NA	NA	NA	NA	NA	NA	NA	NA	NA	NA	NA	NA	NA	NA	-0.576	0.196	0.349	-0.196
4977	Q7LFX5	F6R6M6	tr|F6R6M6|F6R6M6_MACMU	CHST15	-0.102	-0.111	-0.206	-0.0683	-0.164	0	0.055	0.152	0.183	-0.151	-0.222	0.144	0.0852	0.195	-0.234	-0.00765	0.135	0.0301	0.0723
6819	Q7LGC8	F6WDH5	tr|F6WDH5|F6WDH5_MACMU	CHST3	-0.364	-0.289	-0.0408	-0.165	-0.0701	0.182	0.168	0.0928	0.255	0	-0.00126	-0.0616	-0.0431	-0.116	0.108	0.157	0.162	0.453	0.265
10533	Q7RTP0	F6VNT0	tr|F6VNT0|F6VNT0_MACMU	NIPA1	NA	NA	NA	NA	NA	NA	NA	NA	0.332	0	0.0601	-0.217	-0.0746	-0.0844	0.0341	NA	NA	NA	NA
6064	Q7RTS5	F7FA81	tr|F7FA81|F7FA81_MACMU	OTOP3	-0.764	-0.163	-0.017	-0.221	-0.348	2.47	0.434	0.512	0	0.117	-0.0763	0.121	2.24	-0.238	0.849	NA	NA	NA	NA
3803	Q7Z2K8	F6Z5B6	tr|F6Z5B6|F6Z5B6_MACMU	GPRIN1	0.255	0.841	0.493	0.414	0.588	-0.4	-0.133	0.0807	-0.646	-0.149	0	1.07	-0.046	0.288	0.101	-0.34	-0.0777	-0.538	-0.59
3319	Q7Z2T5	F6RCB6	tr|F6RCB6|F6RCB6_MACMU	TRMT1L	NA	NA	NA	NA	NA	NA	NA	NA	0.012	0.123	0	0.165	-0.516	-0.215	-0.151	NA	NA	NA	NA
3544	Q7Z304	F7HRZ5	tr|F7HRZ5|F7HRZ5_MACMU	MAMDC2	NA	NA	NA	NA	NA	NA	NA	NA	-0.267	-0.54	-0.0995	-0.495	0.185	0	0.7	0.167	0.578	-0.109	0.571
9302	Q7Z3B1	F7HQB1	tr|F7HQB1|F7HQB1_MACMU	NEGR1	0.051	0.17	-0.24	-0.00774	0.124	-0.198	-0.187	-0.418	0.278	-0.112	-0.16	0.188	0	0.346	-0.268	-0.0542	0.284	0.42	0.139
10984	Q7Z3D4	F6Y502	tr|F6Y502|F6Y502_MACMU	LYSMD3	NA	NA	NA	NA	NA	NA	NA	NA	NA	NA	NA	NA	NA	NA	NA	0.205	-0.2	-0.254	0.2
7524	Q7Z3H4	F6TC12	tr|F6TC12|F6TC12_MACMU	SAMD7	-0.704	-0.479	0.0918	-0.535	-0.0559	0.156	0.0559	0.423	NA	NA	NA	NA	NA	NA	NA	NA	NA	NA	NA
697	Q7Z3K3	F7H4N3	tr|F7H4N3|F7H4N3_MACMU	POGZ	NA	NA	NA	NA	NA	NA	NA	NA	0.683	0.636	0.31	-0.00504	-0.349	-0.073	0	NA	NA	NA	NA
7334	Q7Z3Y8	F7B5M7	tr|F7B5M7|F7B5M7_MACMU	KRT27	-0.0339	0.196	0	-0.3	-0.292	1.33	-0.225	0.0611	-0.0618	-0.61	0.739	-0.0795	1.57	-0.634	0.458	0.797	2.24	-0.0988	0.104
82	Q7Z408	F7GQF1	tr|F7GQF1|F7GQF1_MACMU	CSMD2	0.205	0.106	-0.0277	-0.0909	-0.0989	0.0656	-0.18	-0.345	0.593	-0.35	0.207	-0.444	0	-0.0159	-0.0471	0.266	0.732	0.596	0.406
8761	Q7Z418	F6VXF2	tr|F6VXF2|F6VXF2_MACMU	KCNK18	-0.413	0.304	0.128	-0.189	-0.128	-0.503	0.551	0.485	NA	NA	NA	NA	NA	NA	NA	NA	NA	NA	NA
6472	Q7Z4V5	F6TFQ9	tr|F6TFQ9|F6TFQ9_MACMU	HDGFRP2	-0.463	0.148	-0.385	0.41	-0.316	0.182	-0.0722	0.0722	NA	NA	NA	NA	NA	NA	NA	NA	NA	NA	NA
12938	Q7Z4W1	F7FSI7	tr|F7FSI7|F7FSI7_MACMU	DCXR	0.208	0.371	0	0.5	-0.183	0.0371	0.0235	-0.022	-0.0402	0.765	-0.254	-0.0654	0.261	-0.33	0.366	-0.113	-0.641	-0.289	0.133
1783	Q7Z553	F6UV60	tr|F6UV60|F6UV60_MACMU	MDGA2	0.00443	0.121	-0.127	-0.14	-0.000387	0.0502	-0.167	0.0952	-0.0814	-0.118	-0.149	-0.0421	0.521	0	0.108	-0.0196	0.171	0.37	0.177
13869	Q7Z5L0	F7HR94	tr|F7HR94|F7HR94_MACMU	VMO1	0	-0.808	0.775	-0.228	-0.347	-0.0252	0.204	0.205	0.557	0.0373	-0.0164	0.236	-0.384	-0.0254	-0.0273	0.529	0.685	-0.341	0.69
5223	Q7Z5L7	F6YEA0	tr|F6YEA0|F6YEA0_MACMU	PODN	0.0177	0.0959	0.129	-0.189	-0.343	-0.236	0.392	-0.0177	NA	NA	NA	NA	NA	NA	NA	0.66	-0.0843	0.712	-0.176
258	Q7Z5N4	F7BC93	tr|F7BC93|F7BC93_MACMU	SDK1	-0.0854	0.0712	-0.064	-0.22	0.318	0.529	0.075	0.543	-0.117	0	-0.13	0.306	0.061	-0.0939	0.15	-0.202	-0.107	-0.143	0.327
7252	Q7Z698	F6WRR5	tr|F6WRR5|F6WRR5_MACMU	SPRED2	0.212	-0.131	-0.411	-2.08	0.131	-0.757	1.34	0.908	NA	NA	NA	NA	NA	NA	NA	NA	NA	NA	NA
10794	Q7Z6G3	F6Q2P6	tr|F6Q2P6|F6Q2P6_MACMU	NECAB2	0.273	-0.0239	0.552	0.587	0.618	-0.22	-0.349	-0.379	-0.461	0.876	0.185	0.85	-0.482	0	-0.15	-0.714	0.168	0.402	-0.0842
2273	Q7Z6J0	F7GYZ5	tr|F7GYZ5|F7GYZ5_MACMU	SH3RF1	NA	NA	NA	NA	NA	NA	NA	NA	NA	NA	NA	NA	NA	NA	NA	-1.05	2.1	-1.15	1.05
5091	Q7Z6J6	F7G8Q1	tr|F7G8Q1|F7G8Q1_MACMU	FRMD5	NA	NA	NA	NA	NA	NA	NA	NA	0.0883	0	0.905	-0.379	-0.521	-0.293	0.13	NA	NA	NA	NA
10742	Q7Z6L0	F6YBL7	tr|F6YBL7|F6YBL7_MACMU	PRRT2	-0.0214	0.221	0.0641	0.0504	0.122	-0.202	0.132	-0.102	-0.259	-0.257	0.219	0.618	-0.0332	-0.01	0.116	-0.402	0	0.205	-0.225
1333	Q7Z6L1	F6SCW7	tr|F6SCW7|F6SCW7_MACMU	TECPR1	NA	NA	NA	NA	NA	NA	NA	NA	0.708	-0.15	-0.211	-0.0352	0.0466	-0.271	0	0.606	0.363	0.303	-0.177
11312	Q7Z6M3	F7HIR0	tr|F7HIR0|F7HIR0_MACMU	MILR1	-0.623	0.381	0.62	0.119	-0.291	0.207	-0.231	0.214	-0.478	-0.403	0.261	0	-0.237	-0.099	-0.239	0.126	0.0933	0.432	-0.0232
24	Q7Z6Z7	F7HBR6	tr|F7HBR6|F7HBR6_MACMU	HUWE1	-0.612	-0.528	0.615	-0.282	0.0427	0.164	0.522	0	-0.718	0.566	0.14	0.364	-0.122	-0.308	0.91	-0.439	0.174	-0.587	-0.127
1458	Q7Z7G0	F7HFX2	tr|F7HFX2|F7HFX2_MACMU	ABI3BP	-0.422	-0.34	-0.335	0.171	-0.351	0	0.43	0.23	-0.359	-0.172	-0.00481	-0.593	0.0211	0.0516	-0.0373	0.288	0.342	0.101	0.309
124	Q7Z7M0	F6TNE5	tr|F6TNE5|F6TNE5_MACMU	MEGF8	0.392	0.113	-0.273	-0.286	-0.102	-0.134	0	-0.171	0.0807	-0.549	0.0474	0.00508	0.318	-0.0725	-0.158	-0.00237	0.225	0.251	0.158
8309	Q7Z7M8	F6Z1M9	tr|F6Z1M9|F6Z1M9_MACMU	B3GNT8	-0.307	-0.203	-0.0857	0.0411	-0.115	0.148	0.232	0.0915	-0.19	-0.0511	-0.0125	-0.0679	-0.213	0.222	0.457	0	0.379	0.227	0.349
2093	Q7Z7M9	F7F8T7	tr|F7F8T7|F7F8T7_MACMU	GALNT5	NA	NA	NA	NA	NA	NA	NA	NA	NA	NA	NA	NA	NA	NA	NA	0.1	0.571	-0.1	-0.814
4224	Q86SF2	F6ZUC7	tr|F6ZUC7|F6ZUC7_MACMU	GALNT7	-0.143	-0.487	-0.291	-0.204	0.717	-0.102	0.149	-0.019	0.0664	-0.0152	-0.302	-0.121	0.336	0.0606	0.0333	0.176	0.153	0.184	0
1618	Q86SJ6	F7GSK7	tr|F7GSK7|F7GSK7_MACMU	DSG4	NA	NA	NA	NA	NA	NA	NA	NA	0.0289	0.205	-0.235	0.1	-0.682	-1.29	0	NA	NA	NA	NA
4316	Q86SR1	F7BKN0	tr|F7BKN0|F7BKN0_MACMU	GALNT10	NA	NA	NA	NA	NA	NA	NA	NA	NA	NA	NA	NA	NA	NA	NA	-0.0461	0.0552	0.0461	-0.114
10983	Q86T03	F6T137	tr|F6T137|F6T137_MACMU	TMEM55B	0.299	0.0362	-0.244	0	-0.0806	0.0533	-0.1	-0.0703	-0.39	-0.29	0.563	0.284	0.0892	0.303	-0.316	NA	NA	NA	NA
1460	Q86T65	F6QKB4	tr|F6QKB4|F6QKB4_MACMU	DAAM2	NA	NA	NA	NA	NA	NA	NA	NA	0.385	0	-0.369	0.267	-0.169	-0.636	0.497	NA	NA	NA	NA
10234	Q86TE4	F6TUI1	tr|F6TUI1|F6TUI1_MACMU	LUZP2	-0.00332	0.0984	0.0529	-0.000936	0.0887	0	0.125	0.245	0.0726	-0.185	-0.00626	-0.0433	-0.0492	0.0814	-0.0114	-0.268	0.375	0.127	-0.0217
1675	Q86TH1	F6YZC1	tr|F6YZC1|F6YZC1_MACMU	ADAMTSL2	0.0515	-0.0194	-0.057	-0.272	0.0474	-0.107	-0.0601	0	0.147	-0.179	-0.104	-0.312	0.0297	-0.114	0.104	0.26	0.416	0.575	0.172
7574	Q86TP1	F6T7J4	tr|F6T7J4|F6T7J4_MACMU	PRUNE1	NA	NA	NA	NA	NA	NA	NA	NA	NA	NA	NA	NA	NA	NA	NA	-0.768	0.239	-0.239	0.904
11941	Q86UD1	F6V7A9	tr|F6V7A9|F6V7A9_MACMU	OAF	0.0407	0.00572	-0.108	-0.292	-0.15	-0.179	-0.0769	0.017	-0.0402	0	0.0169	-0.0184	-0.0736	-0.0832	0.0518	0.0408	0.0641	0.22	0.308
7328	Q86UN2	H9H3N0	tr|H9H3N0|H9H3N0_MACMU	RTN4RL1	-0.101	0.203	-0.137	-0.0487	0.173	-0.418	-0.118	-0.263	0.0614	-0.489	0	0.0593	-0.696	-0.0646	0.148	1.57	1.96	0.286	0.37
10762	Q86UN3	F7GD14	tr|F7GD14|F7GD14_MACMU	RTN4RL2	0.0301	0.183	-0.347	-0.0126	0.126	0.157	-0.152	-0.301	-0.0517	-0.3	-0.0996	0.171	0.0443	0	-0.021	0.192	-0.0391	0.294	0.264
1016	Q86UP2	F7H400	tr|F7H400|F7H400_MACMU	KTN1	0.0652	0.31	0.452	1.19	0.253	0.479	-0.0652	-0.547	NA	NA	NA	NA	NA	NA	NA	-0.491	-0.411	-1.07	-1.15
470	Q86UR5	F6R888	tr|F6R888|F6R888_MACMU	RIMS1	NA	NA	NA	NA	NA	NA	NA	NA	NA	NA	NA	NA	NA	NA	NA	-0.0558	0.0558	0.268	-0.587
7900	Q86UW8	F6UI16	tr|F6UI16|F6UI16_MACMU	HAPLN4	0.0957	0.0711	-0.0389	0.0178	-0.135	0.145	-0.158	-0.125	-0.105	-0.168	0.0631	0	0.145	0.393	-0.0665	0.0855	-0.0541	0.606	-0.133
2155	Q86UX2	F7C8E1	tr|F7C8E1|F7C8E1_MACMU	ITIH5	0.0673	-0.662	-0.518	-0.768	-0.663	0.299	-0.786	-0.329	0.427	-0.33	-0.236	-1.59	0.0764	0.147	0.127	0.106	0.55	0	0.255
5153	Q86UX7	F6RK76	tr|F6RK76|F6RK76_MACMU	FERMT3	-0.101	-0.0835	-0.0909	0.425	0.0721	0.33	0.132	0.157	0.0486	0	-0.134	-0.0338	0.523	0.446	-0.201	-0.347	-0.0881	-0.232	0.623
8290	Q86V24	F7GWW1	tr|F7GWW1|F7GWW1_MACMU	ADIPOR2	0.172	-0.129	-0.279	-0.601	-0.623	0.295	0.129	0.539	NA	NA	NA	NA	NA	NA	NA	NA	NA	NA	NA
4956	Q86V71	F7GIL7	tr|F7GIL7|F7GIL7_MACMU	ZNF429	NA	NA	NA	NA	NA	NA	NA	NA	-0.416	0	0.404	-1.11	0.0437	-0.072	0.47	NA	NA	NA	NA
12182	Q86V81	F6S9B3	tr|F6S9B3|F6S9B3_MACMU	ALYREF	-0.49	0.133	0.532	0.0949	-0.497	0.372	0	0.598	-0.404	0.209	0.207	0.442	-0.00235	-0.147	-0.339	-1.11	-0.433	-0.328	0.176
7338	Q86V85	F7H5N5	tr|F7H5N5|F7H5N5_MACMU	GPR180	NA	NA	NA	NA	NA	NA	NA	NA	NA	NA	NA	NA	NA	NA	NA	-0.464	0.0912	0.0452	-0.0452
1052	Q86VB7	F7DAU3	tr|F7DAU3|F7DAU3_MACMU	CD163	0.186	0.479	0.144	0.523	-0.22	0	-0.0035	0.507	-0.0205	-0.0859	0.158	0.566	-0.286	-0.0148	0.107	-0.271	-0.309	0.63	-0.298
8887	Q86VN1	F7HET5	tr|F7HET5|F7HET5_MACMU	VPS36	NA	NA	NA	NA	NA	NA	NA	NA	0.287	0.444	-0.427	0.014	0	-0.609	-0.0344	NA	NA	NA	NA
1045	Q86VP6	F7H6Z9	tr|F7H6Z9|F7H6Z9_MACMU	CAND1	0.422	0.608	0.293	0.494	0.25	0.065	-0.194	0.0279	-0.262	0	0.332	-0.112	-0.0394	-0.00855	0.0358	-0.122	-0.131	-0.447	-0.215
214	Q86VV8	F6QHL6	tr|F6QHL6|F6QHL6_MACMU	RTTN	NA	NA	NA	NA	NA	NA	NA	NA	NA	NA	NA	NA	NA	NA	NA	-0.087	-0.198	0.087	1.61
6844	Q86VZ4	F6WYJ6	tr|F6WYJ6|F6WYJ6_MACMU	LRP11	0.234	-0.318	-0.214	-0.245	-0.299	0.204	0	-0.104	0.0226	-0.0747	-0.0292	-0.0484	0.182	0.124	-0.0702	0.906	0.248	0.163	0.453
1735	Q86W92	F7DXZ6	tr|F7DXZ6|F7DXZ6_MACMU	PPFIBP1	NA	NA	NA	NA	NA	NA	NA	NA	0.283	0.364	0	-0.176	-0.114	-0.109	0.428	NA	NA	NA	NA
8704	Q86WD7	F6SEU5	tr|F6SEU5|F6SEU5_MACMU	SERPINA9	0.264	0.473	0.024	-0.167	0.181	-0.0417	-0.257	-0.394	-0.432	-0.345	0	0.363	0.0953	-0.196	0.0535	0.0816	-0.225	0.000986	-0.17
32	Q86WI1	F6SXR1	tr|F6SXR1|F6SXR1_MACMU	PKHD1L1	0.23	-0.00874	-0.184	0.617	-0.221	0.00874	0.377	-0.299	NA	NA	NA	NA	NA	NA	NA	NA	NA	NA	NA
10012	Q86WS5	F6X231	tr|F6X231|F6X231_MACMU	TMPRSS12	0.298	0.933	0.446	0.101	0.334	-0.386	-0.375	-0.382	-0.19	0.151	0.194	0.124	0.000613	-0.25	-0.157	-0.153	-1.49	0	-0.837
7047	Q86X45	F6RL15	tr|F6RL15|F6RL15_MACMU	LRRC6	-0.52	-0.364	0	0.0485	0.0612	-0.352	0.421	0.0906	0.414	0.817	-1.04	0.718	-1.17	-0.678	0.0661	-0.0408	-0.514	-0.459	0.337
1235	Q86XP1	F6UYE9	tr|F6UYE9|F6UYE9_MACMU	DGKH	-0.0165	-0.497	0.0165	0.0549	-0.422	0.189	-0.194	0.227	NA	NA	NA	NA	NA	NA	NA	NA	NA	NA	NA
13317	Q86XR7	F6UU63	tr|F6UU63|F6UU63_MACMU	TICAM2	-0.143	0	-0.112	-0.157	-0.0773	0.237	0.0108	-0.223	0.0179	-0.204	-0.000828	-0.0648	0.105	0.293	-0.252	0.0749	0.191	0.667	0.192
8193	Q86XZ4	F7GXD3	tr|F7GXD3|F7GXD3_MACMU	SPATS2	0.907	-0.453	-1.69	0.404	0.155	-0.155	0.242	-0.971	NA	NA	NA	NA	NA	NA	NA	NA	NA	NA	NA
5597	Q86Y22	F6XQX7	tr|F6XQX7|F6XQX7_MACMU	COL23A1	NA	NA	NA	NA	NA	NA	NA	NA	-0.0246	-0.203	-0.151	0	0.452	0.501	-0.0409	0.0156	-0.536	0.597	0.544
1794	Q86Y38	F7H2Y6	tr|F7H2Y6|F7H2Y6_MACMU	XYLT1	0.137	0.108	-0.0957	-0.22	-0.175	0.209	-0.246	-0.171	0.0845	-0.204	0	0.212	0.163	-0.0185	-0.481	0.139	0.0989	0.458	-0.0572
5986	Q86Y46	F7AEN7	tr|F7AEN7|F7AEN7_MACMU	KRT73	-0.813	-0.18	0.728	-0.529	-0.0336	0.112	0.204	0.15	-0.177	-0.579	-0.0109	-0.106	0.693	-0.691	0.351	0	0.56	0.143	0.07
14031	Q86Y78	F7FWP8	tr|F7FWP8|F7FWP8_MACMU	LYPD6	-0.0439	-0.354	-0.0938	-0.715	-0.299	-0.222	0.0439	0.0653	NA	NA	NA	NA	NA	NA	NA	0.295	0.513	0.74	0.411
12107	Q86Y82	F7GMG0	tr|F7GMG0|F7GMG0_MACMU	STX12	-0.379	-0.0719	0.396	0.145	0.0978	0	0.335	0.488	-0.0616	-0.0219	-3.5e-05	0.481	0.422	0.173	-0.102	-0.414	0.123	-0.285	-0.119
6753	Q86Y97	F6V761	tr|F6V761|F6V761_MACMU	KMT5C	NA	NA	NA	NA	NA	NA	NA	NA	0.29	-0.0191	-0.131	0.227	0	-0.149	0.313	NA	NA	NA	NA
1836	Q86YA3	F7HFN4	tr|F7HFN4|F7HFN4_MACMU	ZGRF1	-1.51	-0.865	-0.165	0.756	-0.454	0.224	0.165	1.12	NA	NA	NA	NA	NA	NA	NA	NA	NA	NA	NA
9462	Q86YD3	F7FZ15	tr|F7FZ15|F7FZ15_MACMU	TMEM25	0	-0.179	-0.52	0.135	0.106	-0.157	0.128	0.404	0.409	0.151	-0.155	-0.152	0.143	-0.0241	-0.198	-0.393	0.358	0.273	-0.208
9630	Q86YD5	F7ERI1	tr|F7ERI1|F7ERI1_MACMU	LDLRAD3	0.75	-0.0187	-0.0985	-0.284	0.387	-0.0963	0	-0.488	0.327	-0.0967	-0.194	0.325	-0.0732	0.0694	-0.131	0.386	0.465	0.582	0.0956
9746	Q86YM7	F7HNK9	tr|F7HNK9|F7HNK9_MACMU	HOMER1	0.105	0.175	0.0539	-0.0539	0.293	-0.412	-0.176	-0.208	NA	NA	NA	NA	NA	NA	NA	NA	NA	NA	NA
9103	Q86YT9	F7H306	tr|F7H306|F7H306_MACMU	JAML	NA	NA	NA	NA	NA	NA	NA	NA	NA	NA	NA	NA	NA	NA	NA	0.241	-0.154	-0.0505	0.0505
10953	Q86YW5	F6QVI2	tr|F6QVI2|F6QVI2_MACMU	TREML1	-0.225	-0.223	0.118	-0.349	0.0447	-0.173	0.301	0.178	0.363	0.495	-0.472	0.2	-0.307	-0.281	0.0518	-0.0692	-0.249	0.303	0
167	Q8IUG5	F7EH57	tr|F7EH57|F7EH57_MACMU	MYO18B	0.331	-0.126	0.298	-0.455	-0.359	0.00898	0.219	-0.00898	NA	NA	NA	NA	NA	NA	NA	NA	NA	NA	NA
7362	Q8IUI8	F7EEG1	tr|F7EEG1|F7EEG1_MACMU	CRLF3	NA	NA	NA	NA	NA	NA	NA	NA	-0.537	0.605	-0.205	-1.19	-0.166	0.245	1.84	0.485	0.0287	0	-0.202
6219	Q8IUK5	F7CEC9	tr|F7CEC9|F7CEC9_MACMU	PLXDC1	-0.0736	-0.289	-0.345	-0.0341	-0.247	0.364	0.119	-0.166	0.0265	-0.154	-0.246	-0.5	0.499	0.453	0.0205	0	0.369	0.731	0.0851
13138	Q8IUK8	F7CXQ6	tr|F7CXQ6|F7CXQ6_MACMU	CBLN2	0.198	0.189	-0.221	-0.221	0.0741	-0.292	-0.0465	-0.214	0.197	-0.0591	-0.229	0.307	-0.033	0.261	-0.312	0	0.231	0.398	0.208
11774	Q8IUW5	F6W385	tr|F6W385|F6W385_MACMU	RELL1	-0.311	-0.355	-0.372	0.00531	-0.303	0.384	0.163	0	0.901	-0.241	-0.281	-0.258	-0.0015	0.167	-0.0976	0.267	0.449	0.504	0.42
1363	Q8IUX7	F6PLZ7	tr|F6PLZ7|F6PLZ7_MACMU	AEBP1	0.225	-0.229	0.0766	-0.152	0.153	0.00104	-0.0152	-0.00794	-0.182	-0.0433	0	-0.035	0.168	0.0418	-0.302	0.0601	0.162	-0.182	0.0509
7450	Q8IUZ5	F6XR52	tr|F6XR52|F6XR52_MACMU	PHYKPL	NA	NA	NA	NA	NA	NA	NA	NA	-0.191	-0.211	0.608	-0.359	0	-0.298	0.311	0.213	0.181	0.557	-0.0641
6269	Q8IV08	F6W2K4	tr|F6W2K4|F6W2K4_MACMU	PLD3	-0.258	0.0169	-0.199	0	-0.123	-0.0355	-0.144	0.0206	0.0736	-0.143	0.149	-0.17	0.0116	0.232	-0.312	-0.0477	0.298	0.102	0.131
15115	Q8IVA1	B2ZNZ3	tr|B2ZNZ3|B2ZNZ3_MACMU	PCP2	NA	NA	NA	NA	NA	NA	NA	NA	NA	NA	NA	NA	NA	NA	NA	-0.206	1.65	0.0211	-0.0211
1533	Q8IVE3	F6ZRY3	tr|F6ZRY3|F6ZRY3_MACMU	PLEKHH2	NA	NA	NA	NA	NA	NA	NA	NA	NA	NA	NA	NA	NA	NA	NA	0.229	-0.143	0.143	-1.07
7500	Q8IW19	F6T7P4	tr|F6T7P4|F6T7P4_MACMU	APLF	0.258	0.566	0.15	0.0728	-0.233	-0.568	-0.0728	-0.217	NA	NA	NA	NA	NA	NA	NA	NA	NA	NA	NA
2469	Q8IW52	F7GI13	tr|F7GI13|F7GI13_MACMU	SLITRK4	0.214	0.123	-0.259	0.0259	-0.0734	-0.228	0.0761	-0.259	0	-0.0651	-0.336	0.0249	0.0125	0.212	-0.306	-0.34	0.164	0.168	-0.0344
2495	Q8IWA0	F7FX33	tr|F7FX33|F7FX33_MACMU	WDR75	-0.274	-0.092	0.0405	0.0422	0.0904	-0.453	0.572	-0.0405	NA	NA	NA	NA	NA	NA	NA	NA	NA	NA	NA
5388	Q8IWB1	F6SPT7	tr|F6SPT7|F6SPT7_MACMU	ITPRIP	NA	NA	NA	NA	NA	NA	NA	NA	NA	NA	NA	NA	NA	NA	NA	-0.393	1.01	0.393	-0.523
15428	Q8IWT1	G7NCB4	tr|G7NCB4|G7NCB4_MACMU	SCN4B	0.275	-0.189	-0.299	0	-0.157	-0.337	0.249	0.0247	0.0803	-0.137	-0.121	-0.266	0.231	0.159	-0.229	0.218	0.577	0.396	-0.0389
2111	Q8IWU5	F7GWJ0	tr|F7GWJ0|F7GWJ0_MACMU	SULF2	-0.00968	-0.258	-0.412	-0.34	-0.392	-0.0254	0	0.256	0.0426	0.0855	-0.295	-0.395	0.0817	0.168	-0.0563	0.21	0.267	0.524	0.165
2869	Q8IWU6	F7FJY3	tr|F7FJY3|F7FJY3_MACMU	SULF1	-0.755	-0.417	-0.0725	-0.369	0.0385	0.14	0.142	0.244	0.227	0.0765	0.144	0	-0.581	-0.438	0.448	-0.383	0.183	-0.526	-0.429
1713	Q8IWV2	F7GQV2	tr|F7GQV2|F7GQV2_MACMU	CNTN4	0.0737	0.043	-0.118	-0.00993	0	-0.089	0.0593	-0.164	-0.0105	0.127	-0.168	-0.0498	0.142	0.214	0.261	-0.131	0.0253	0.363	-0.129
2441	Q8IWW6	F6SEZ7	tr|F6SEZ7|F6SEZ7_MACMU	ARHGAP12	NA	NA	NA	NA	NA	NA	NA	NA	0.0687	0	-0.00691	0.0888	-0.32	-0.381	0.456	NA	NA	NA	NA
1733	Q8IWY4	F6W3I7	tr|F6W3I7|F6W3I7_MACMU	SCUBE1	-0.256	-0.328	-0.187	-0.0879	-0.224	0.0266	0.123	-0.0526	0.139	-0.284	-0.0772	0.00729	0.243	0.521	-0.436	0.383	0	0.631	0.106
1523	Q8IX03	F6SW62	tr|F6SW62|F6SW62_MACMU	WWC1	-0.218	-0.154	0.385	-0.203	0.475	-0.273	0.218	0.154	NA	NA	NA	NA	NA	NA	NA	NA	NA	NA	NA
12892	Q8IX05	F6PSP6	tr|F6PSP6|F6PSP6_MACMU	CD302	0.548	-0.945	0	-0.493	0.126	-0.0472	0.287	0.146	0.259	-0.149	-0.274	-0.0615	0.917	-0.168	0.0464	-0.398	-0.285	1.07	0.217
1660	Q8IX30	F7HI44	tr|F7HI44|F7HI44_MACMU	SCUBE3	NA	NA	NA	NA	NA	NA	NA	NA	0.223	-0.0458	0.00204	0	-0.576	-0.519	-0.189	6.76e-05	-0.298	0.34	0.0525
11526	Q8IXE1	F7GPD9	tr|F7GPD9|F7GPD9_MACMU	OR4N5	NA	NA	NA	NA	NA	NA	NA	NA	0.252	-0.306	-0.0638	0	0.0118	-0.647	0.265	NA	NA	NA	NA
3061	Q8IXH8	F7HIN8	tr|F7HIN8|F7HIN8_MACMU	CDH26	NA	NA	NA	NA	NA	NA	NA	NA	-0.349	0.169	-0.149	0.0469	0.479	-0.158	0	NA	NA	NA	NA
4899	Q8IXL6	F7C042	tr|F7C042|F7C042_MACMU	FAM20C	-0.32	0.0344	-0.123	-0.135	0.00362	0.179	0.163	-0.025	-0.159	-0.036	-0.041	0.0398	0	-0.166	-0.0668	0.0562	0.29	0.426	0.0547
13884	Q8IXQ8	F7HJV0	tr|F7HJV0|F7HJV0_MACMU	PDZD9	NA	NA	NA	NA	NA	NA	NA	NA	-0.955	1.05	-0.508	0.888	-0.911	0	0.239	NA	NA	NA	NA
2169	Q8IXZ2	F6SQ81	tr|F6SQ81|F6SQ81_MACMU	ZC3H3	0.167	-0.421	0.587	-0.726	-0.167	-0.446	0.914	0.794	NA	NA	NA	NA	NA	NA	NA	NA	NA	NA	NA
4405	Q8IYD1	H9H4K5	tr|H9H4K5|H9H4K5_MACMU	GSPT2	NA	NA	NA	NA	NA	NA	NA	NA	NA	NA	NA	NA	NA	NA	NA	0.161	-0.0344	0.0344	-0.0587
2253	Q8IYF3	F6VEU8	tr|F6VEU8|F6VEU8_MACMU	TEX11	NA	NA	NA	NA	NA	NA	NA	NA	0.0346	0.0639	0	0.0212	-0.846	-0.222	0.0735	-0.0185	-0.431	0.484	-0.0752
11050	Q8IYJ0	F6PRP7	tr|F6PRP7|F6PRP7_MACMU	PIANP	0.054	0.259	-0.283	0.533	-0.268	0.202	-0.161	-0.204	-0.192	-0.0282	-0.0864	-0.082	0.0715	0.085	-0.223	0.0105	0	0.697	0.246
10005	Q8IYK8	F7GLC3	tr|F7GLC3|F7GLC3_MACMU	REM2	0.493	-0.101	0	0.178	-0.104	0.436	-0.112	-0.0832	-0.0293	0.0922	0.33	-0.13	0.623	0.0172	-0.0364	NA	NA	NA	NA
8341	Q8IYR6	F6ZHS5	tr|F6ZHS5|F6ZHS5_MACMU	MSANTD3-TMEFF1	-0.198	-0.0688	-0.202	0.198	0.299	4.03e-05	-0.171	-0.241	-0.188	0	0.167	-0.119	0.421	0.358	-0.306	0.207	0.139	0.642	-0.0398
2905	Q8IZ52	F6ZK43	tr|F6ZK43|F6ZK43_MACMU	CHPF	-0.212	-0.00774	-0.11	-0.131	0.00774	0.278	0.0532	-0.0986	NA	NA	NA	NA	NA	NA	NA	0.642	-0.152	0.619	0.118
1524	Q8IZA0	F7G1C0	tr|F7G1C0|F7G1C0_MACMU	KIAA0319L	NA	NA	NA	NA	NA	NA	NA	NA	0.27	0	-0.235	-0.414	0.125	-0.114	0.07	NA	NA	NA	NA
9112	Q8IZC7	F6ZCX9	tr|F6ZCX9|F6ZCX9_MACMU	ZNF101	0.179	0	0.00309	-0.418	-0.0473	0.0517	0.174	0.0177	0.0967	-0.0379	-0.161	-0.177	0.0556	0.7	-0.181	-0.612	-0.66	-1.08	0.918
453	Q8IZF0	F7C7E0	tr|F7C7E0|F7C7E0_MACMU	NALCN	NA	NA	NA	NA	NA	NA	NA	NA	NA	NA	NA	NA	NA	NA	NA	-1.74	0.087	0.273	-0.087
922	Q8IZF2	F6TIA3	tr|F6TIA3|F6TIA3_MACMU	ADGRF5	NA	NA	NA	NA	NA	NA	NA	NA	-0.0529	0.114	0	-0.281	-0.0884	0.118	0.194	NA	NA	NA	NA
1854	Q8IZJ1	F6UDV7	tr|F6UDV7|F6UDV7_MACMU	UNC5B	0.168	0.00886	-0.227	0.166	-0.0279	-0.00601	-0.0863	-0.0771	0.133	-0.297	-0.0186	-0.00389	0.148	0.702	-0.269	0.426	0.137	0.672	0
1009	Q8IZJ3	F7H9M3	tr|F7H9M3|F7H9M3_MACMU	CPAMD8	0.0884	0.0182	-0.184	-0.119	-0.0978	-0.0878	0.321	0.00944	0.15	-0.219	-0.135	-0.195	0.136	0.0182	0.159	0	0.323	-0.27	-0.0822
6378	Q8IZP7	F6TT40	tr|F6TT40|F6TT40_MACMU	HS6ST3	0.349	0.491	-0.0711	0.221	0.0522	-0.138	-0.0495	-0.112	-0.0469	-0.112	-0.117	0.422	0	0.217	-0.0227	-0.141	0.154	0.49	0.107
10758	Q8N0V5	F6Z9P4	tr|F6Z9P4|F6Z9P4_MACMU	GCNT2	NA	NA	NA	NA	NA	NA	NA	NA	0.0744	-0.261	0	0.278	-0.122	0.27	-0.457	NA	NA	NA	NA
10325	Q8N0X4	F7ETT5	tr|F7ETT5|F7ETT5_MACMU	CLYBL	NA	NA	NA	NA	NA	NA	NA	NA	NA	NA	NA	NA	NA	NA	NA	0.000492	0.315	-0.186	-0.000492
3947	Q8N0X7	F6YG32	tr|F6YG32|F6YG32_MACMU	SPG20	NA	NA	NA	NA	NA	NA	NA	NA	NA	NA	NA	NA	NA	NA	NA	1.04	-0.0967	0.0967	-0.144
3677	Q8N103	F7H213	tr|F7H213|F7H213_MACMU	TAGAP	-0.331	-0.139	-0.0392	0.452	0.0174	-0.0174	0.0601	0.229	NA	NA	NA	NA	NA	NA	NA	NA	NA	NA	NA
15088	Q8N111	F6QDS4	tr|F6QDS4|F6QDS4_MACMU	CEND1	-0.741	-0.547	0.089	-0.291	-0.524	0.2	0.68	1.46	0.191	0.331	0	-0.421	-0.07	2.23	-0.0294	NA	NA	NA	NA
8947	Q8N126	F7BNU9	tr|F7BNU9|F7BNU9_MACMU	CADM3	0.0689	0.094	-0.112	0.186	0	-0.196	-0.08	-0.137	0.103	0.0714	-0.33	0.103	-0.0836	0.182	-0.407	-0.0329	0.149	0.174	-0.0688
13584	Q8N128	F7DXG3	tr|F7DXG3|F7DXG3_MACMU	FAM177A1	NA	NA	NA	NA	NA	NA	NA	NA	NA	NA	NA	NA	NA	NA	NA	-0.0653	-0.31	0.237	0.0653
2409	Q8N137	F6Z863	tr|F6Z863|F6Z863_MACMU	CNTROB	-0.0311	0.033	-0.0086	0.0492	-0.0645	0.484	-0.441	0.0086	NA	NA	NA	NA	NA	NA	NA	NA	NA	NA	NA
573	Q8N139	F6Y772	tr|F6Y772|F6Y772_MACMU	ABCA6	NA	NA	NA	NA	NA	NA	NA	NA	NA	NA	NA	NA	NA	NA	NA	-0.144	0.466	0.0873	-0.0873
8347	Q8N142	F6W4C2	tr|F6W4C2|F6W4C2_MACMU	ADSSL1	NA	NA	NA	NA	NA	NA	NA	NA	NA	NA	NA	NA	NA	NA	NA	0.338	-0.427	-0.338	1.22
5335	Q8N145	F7HAC9	tr|F7HAC9|F7HAC9_MACMU	LGI3	-0.0169	-0.0438	-0.11	-0.254	-0.323	0.569	0.0387	-0.00838	-0.0292	-0.446	0.321	0.236	0.14	0	0.122	0.171	0.217	0.205	-0.155
4366	Q8N239	F6QK71	tr|F6QK71|F6QK71_MACMU	KLHL34	NA	NA	NA	NA	NA	NA	NA	NA	0.0864	0.294	-0.637	0.161	-0.301	-0.236	0	NA	NA	NA	NA
7950	Q8N2I9	F7GJZ3	tr|F7GJZ3|F7GJZ3_MACMU	STK40	NA	NA	NA	NA	NA	NA	NA	NA	0	0.292	-0.378	1.32	-0.396	-0.669	0.0599	NA	NA	NA	NA
10102	Q8N2R0	F6ZN02	tr|F6ZN02|F6ZN02_MACMU	OSR2	NA	NA	NA	NA	NA	NA	NA	NA	NA	NA	NA	NA	NA	NA	NA	0.414	-0.00922	0.00922	-0.107
1224	Q8N2S1	F7H9U1	tr|F7H9U1|F7H9U1_MACMU	LTBP4	0.201	-0.824	-0.475	-0.221	-0.229	0.0909	-0.0553	0	-0.205	-0.186	-0.337	-0.369	0.138	0.0378	0.0838	0.391	0.681	0.00244	0.389
788	Q8N3D4	F7ALS2	tr|F7ALS2|F7ALS2_MACMU	EHBP1L1	NA	NA	NA	NA	NA	NA	NA	NA	NA	NA	NA	NA	NA	NA	NA	1.65	-0.407	0.407	-0.548
15048	Q8N3H0	F6PPL1	tr|F6PPL1|F6PPL1_MACMU	FAM19A2	-0.694	-0.0769	-0.242	-0.315	0.229	0.298	0.00341	0.149	-0.0422	-0.191	0	0.139	-0.0299	0.317	-0.329	-0.0414	0.0475	0.637	0.216
8083	Q8N3J6	F6ZPZ6	tr|F6ZPZ6|F6ZPZ6_MACMU	CADM2	0.197	0.273	-0.0852	0.123	0.0741	-0.297	-0.184	-0.299	-0.127	-0.152	-0.0596	0.259	0	0.2	-0.2	-0.0233	0.274	0.746	0.114
4205	Q8N3L3	F6T044	tr|F6T044|F6T044_MACMU	TXLNB	NA	NA	NA	NA	NA	NA	NA	NA	NA	NA	NA	NA	NA	NA	NA	0.0405	-0.0883	-0.0405	1.88
7065	Q8N3T1	F7GSP8	tr|F7GSP8|F7GSP8_MACMU	GALNT15	NA	NA	NA	NA	NA	NA	NA	NA	NA	NA	NA	NA	NA	NA	NA	-0.103	-0.051	0.494	0.051
3651	Q8N3T6	F7HRK5	tr|F7HRK5|F7HRK5_MACMU	TMEM132C	-0.1	-0.173	0.0405	-0.056	0.221	-0.153	0	-0.111	0.275	-0.0189	-0.0555	-0.0893	0.107	-0.0542	0.0225	0.121	0.152	0.467	0.101
2135	Q8N3V7	F6TW94	tr|F6TW94|F6TW94_MACMU	SYNPO	0.735	0.14	0.322	0.531	0.395	-0.556	-0.359	-0.414	-0.652	-0.311	0.648	0.612	0.41	0	0.104	-0.355	-0.543	-0.251	-0.186
5373	Q8N3Z6	F6SX56	tr|F6SX56|F6SX56_MACMU	ZCCHC7	-1.35	-1.41	0.194	-0.0291	0.0291	-0.91	0.172	0.221	NA	NA	NA	NA	NA	NA	NA	NA	NA	NA	NA
5683	Q8N427	F6QHM5	tr|F6QHM5|F6QHM5_MACMU	NME8	-0.036	-0.222	0.436	-0.0627	0.265	-0.135	0.123	0.126	NA	NA	NA	NA	NA	NA	NA	0.036	0.34	-0.104	-0.149
5134	Q8N428	F7AFB0	tr|F7AFB0|F7AFB0_MACMU	GALNT16	-0.00306	-0.27	-0.403	0.0072	-0.177	0.31	0.0538	0.0682	-0.111	-0.00672	-0.331	0.00506	0	0.47	-0.325	0.0396	0.163	0.383	-0.0396
2909	Q8N436	F6W9K4	tr|F6W9K4|F6W9K4_MACMU	CPXM2	-0.00922	-0.404	0.283	0.343	0.116	-0.126	0	-0.19	0.129	0.309	0.173	0.0089	-0.0433	0.174	0.167	-0.335	-0.0315	-0.384	-0.248
6390	Q8N441	F7GP92	tr|F7GP92|F7GP92_MACMU	FGFRL1	NA	NA	NA	NA	NA	NA	NA	NA	NA	NA	NA	NA	NA	NA	NA	0.353	-0.457	0.459	-0.353
9263	Q8N443	F7H3K7	tr|F7H3K7|F7H3K7_MACMU	RIBC1	NA	NA	NA	NA	NA	NA	NA	NA	-0.13	1.13	-0.418	0.532	0	-0.332	0.214	NA	NA	NA	NA
10269	Q8N474	F6SGW3	tr|F6SGW3|F6SGW3_MACMU	SFRP1	0.0315	-0.25	0.18	-0.115	0	-0.0355	0.234	-0.0109	-0.0594	0.177	-0.262	0.0152	0.159	-0.154	0.504	NA	NA	NA	NA
2435	Q8N475	F7FG71	tr|F7FG71|F7FG71_MACMU	FSTL5	0.289	-0.273	-0.281	-0.357	0.248	-0.0795	0.171	-0.133	0.219	0.129	-0.373	0	0.0877	0.373	-0.129	0.00345	0.529	-0.136	-0.166
7305	Q8N4T0	F6VMP4	tr|F6VMP4|F6VMP4_MACMU	CPA6	-0.0587	0.274	0.221	0.0105	0.202	-0.342	0.736	0	-0.0963	0.597	-0.255	-0.0421	-0.43	-0.0183	0.64	NA	NA	NA	NA
7548	Q8N539	F7DFG3	tr|F7DFG3|F7DFG3_MACMU	FIBCD1	0.177	-0.0974	-0.158	-0.0781	0.00914	-0.203	0.0769	-0.38	0.255	-0.283	0.101	0.201	0.0866	0	0.0175	-0.14	0.107	-0.36	-0.133
8277	Q8N5F7	F7EB44	tr|F7EB44|F7EB44_MACMU	NKAP	0.584	0.814	0.0569	0.665	-0.0569	-0.173	-1.1	-1.19	NA	NA	NA	NA	NA	NA	NA	NA	NA	NA	NA
2887	Q8N608	F7FD38	tr|F7FD38|F7FD38_MACMU	DPP10	0	0.00833	-0.0232	-0.169	0.118	-0.43	-0.039	-0.145	0.26	-0.0543	-0.197	0.112	-0.303	0.127	-0.182	0.0514	0.0966	0.32	0.104
15617	Q8N668	F6ZZ20	tr|F6ZZ20|F6ZZ20_MACMU	COMMD1	NA	NA	NA	NA	NA	NA	NA	NA	NA	NA	NA	NA	NA	NA	NA	-0.176	-0.174	0.174	0.283
7246	Q8N684	F7DUH0	tr|F7DUH0|F7DUH0_MACMU	CPSF7	-0.29	-0.261	-0.269	0.106	0.0309	0.122	0.0815	-0.0309	NA	NA	NA	NA	NA	NA	NA	NA	NA	NA	NA
807	Q8N6C5	F6TRX2	tr|F6TRX2|F6TRX2_MACMU	IGSF1	0.111	-0.0436	0.0493	0.147	-0.0368	0.0684	0.0271	-0.0386	-0.0564	-0.145	0.00171	-0.101	-0.0952	0.206	0.0644	-0.314	0	0.211	-0.101
15964	Q8N6N7	F7CHP3	tr|F7CHP3|F7CHP3_MACMU	ACBD7	-0.0791	-0.0749	0.188	-0.0595	-0.157	-0.0266	0.432	0.22	0	-0.0404	-0.321	0.248	0.384	0.161	0.442	-0.683	-0.373	0.416	0.549
15839	Q8N729	F7GJ09	tr|F7GJ09|F7GJ09_MACMU	NPW	NA	NA	NA	NA	NA	NA	NA	NA	0.0716	-0.641	-0.301	0.18	0.0627	-0.144	-1.31	0.194	-0.583	0.807	0
12657	Q8N7B6	F6UAZ0	tr|F6UAZ0|F6UAZ0_MACMU	PACRGL	1.05	-0.398	-0.0537	0.0883	0.158	-0.0514	-0.0249	0.0249	NA	NA	NA	NA	NA	NA	NA	NA	NA	NA	NA
5553	Q8N7P1	F6ZT28	tr|F6ZT28|F6ZT28_MACMU	PLD5	0.339	-0.415	-0.591	0.0312	-0.232	0	0.106	0.0531	0.089	-0.135	-0.555	-0.0773	0.141	0.266	-0.461	-0.18	0.0987	0.31	-0.127
10761	Q8N815	F7EBF8	tr|F7EBF8|F7EBF8_MACMU	CNTD1	0.027	-0.101	-0.106	0.0601	-0.027	0.258	0.0324	-0.113	NA	NA	NA	NA	NA	NA	NA	NA	NA	NA	NA
7421	Q8N884	F7B8L6	tr|F7B8L6|F7B8L6_MACMU	MB21D1	-0.391	-0.313	0	-0.194	0.0427	-0.035	0.327	0.0651	0.102	-0.238	-0.256	0.0423	-0.247	0.127	0.126	NA	NA	NA	NA
9595	Q8N8N7	F7F364	tr|F7F364|F7F364_MACMU	PTGR2	NA	NA	NA	NA	NA	NA	NA	NA	-0.317	0.0103	0	-0.175	0.232	-0.481	0.526	0.00843	-0.0997	-0.0654	0.00861
8905	Q8N8S7	F6W0D8	tr|F6W0D8|F6W0D8_MACMU	ENAH	NA	NA	NA	NA	NA	NA	NA	NA	-0.191	-0.0745	0.643	-0.744	0.00827	0	0.504	NA	NA	NA	NA
8444	Q8N8V4	F7DC96	tr|F7DC96|F7DC96_MACMU	ANKS4B	-0.219	-0.257	0.173	-0.131	0.06	-0.06	0.621	0.345	NA	NA	NA	NA	NA	NA	NA	NA	NA	NA	NA
6984	Q8N8Z6	F6TGP3	tr|F6TGP3|F6TGP3_MACMU	DCBLD1	0.102	0.00629	-0.269	-0.0433	-0.212	0.0602	0.02	-0.0562	NA	NA	NA	NA	NA	NA	NA	-0.00629	0.0617	0.627	-0.0893
8950	Q8N967	F7GWS1	tr|F7GWS1|F7GWS1_MACMU	LRTM2	-0.165	0	-0.0392	-0.0472	0.135	-0.235	-0.00239	-0.14	0.228	0.148	0.207	0.748	0.241	0.468	-0.249	-0.438	0.335	0.875	-0.292
5631	Q8N9B5	F7FK47	tr|F7FK47|F7FK47_MACMU	JMY	NA	NA	NA	NA	NA	NA	NA	NA	-0.0932	0	0.212	1.07	-0.205	-0.315	0.239	NA	NA	NA	NA
4656	Q8N9T8	F7HID9	tr|F7HID9|F7HID9_MACMU	KRI1	NA	NA	NA	NA	NA	NA	NA	NA	NA	NA	NA	NA	NA	NA	NA	-0.646	1.18	-0.2	0.2
5810	Q8NA03	F6WIX2	tr|F6WIX2|F6WIX2_MACMU	FSIP1	NA	NA	NA	NA	NA	NA	NA	NA	0.49	0	-0.384	0.48	-0.396	-0.271	0.512	NA	NA	NA	NA
1017	Q8NAP3	F6TJ26	tr|F6TJ26|F6TJ26_MACMU	ZBTB38	NA	NA	NA	NA	NA	NA	NA	NA	NA	NA	NA	NA	NA	NA	NA	-0.052	0.052	0.505	-0.115
9598	Q8NBI3	F7G6R4	tr|F7G6R4|F7G6R4_MACMU	DRAXIN	NA	NA	NA	NA	NA	NA	NA	NA	NA	NA	NA	NA	NA	NA	NA	-0.16	0.163	0.0158	-0.0158
8390	Q8NBI6	F6XJL0	tr|F6XJL0|F6XJL0_MACMU	XXYLT1	-0.48	-0.33	0.223	-0.0569	-0.026	0.0227	0.331	0.204	0.0315	0.196	-0.004	-0.102	-0.0621	0.305	-0.226	0.184	-0.0859	0.355	0
9632	Q8NBJ4	F7FX41	tr|F7FX41|F7FX41_MACMU	GOLM1	0.22	-0.0385	-0.118	-0.126	-0.117	-0.0934	0	-0.116	0.0654	-0.134	0.0498	-0.247	0.247	0.233	-0.189	0.321	0.311	0.453	0.233
3772	Q8NBP7	A8T666	sp|A8T666|PCSK9_MACMU	PCSK9	-0.185	-0.281	-0.116	-0.113	-0.0671	0	0.11	0.431	-0.00369	0.0489	0.0365	-0.298	0.184	-0.0186	0.464	0.316	0.571	-0.0961	0.298
9568	Q8NBS9	F7E4H1	tr|F7E4H1|F7E4H1_MACMU	TXNDC5	0	0.174	-0.163	0.276	0.205	0.035	-0.228	-0.00218	-0.0338	0.0903	0.0548	0.0097	-0.079	-0.0344	0.0131	-0.213	0.174	-0.0323	-0.0931
10872	Q8NC24	F6V688	tr|F6V688|F6V688_MACMU	RELL2	-0.215	0.0425	0.0591	-0.213	-0.127	0.0378	0.0748	-0.0378	NA	NA	NA	NA	NA	NA	NA	NA	NA	NA	NA
7916	Q8NC51	F6WZG6	tr|F6WZG6|F6WZG6_MACMU	SERBP1	NA	NA	NA	NA	NA	NA	NA	NA	NA	NA	NA	NA	NA	NA	NA	-0.0246	-0.115	0.283	0.0246
12391	Q8NC54	F6YIW0	tr|F6YIW0|F6YIW0_MACMU	C5orf15	NA	NA	NA	NA	NA	NA	NA	NA	0.258	0	-0.156	0.444	0.257	-0.204	-0.243	NA	NA	NA	NA
5544	Q8NC67	F6RCV4	tr|F6RCV4|F6RCV4_MACMU	NETO2	0.159	-0.292	-0.254	-0.063	-0.121	0.531	-0.163	-0.0673	0.274	0	-0.311	-0.0986	0.225	0.154	-0.0351	0.194	0.517	0.738	0.3
6366	Q8NCB2	F7G7H7	tr|F7G7H7|F7G7H7_MACMU	CAMKV	0.222	0.0498	0.0198	0.164	0.278	0.936	-0.77	-0.841	-1.2	-0.688	0.669	0.689	0.879	-0.135	0	-0.414	-0.49	-0.276	-0.367
7843	Q8NCC3	F6QQ29	tr|F6QQ29|F6QQ29_MACMU	PLA2G15	-0.00578	-0.202	-0.167	-0.261	-0.144	0.112	0	-0.05	0.11	0.0648	0.328	-0.304	0.00692	0.13	-0.197	-0.0405	0.149	0.122	0.449
4308	Q8NCL4	F7FDF4	tr|F7FDF4|F7FDF4_MACMU	GALNT6	0.278	-0.389	0	-0.23	-0.0636	0.267	0.142	-0.297	0.233	-0.282	-0.159	-0.226	0.0282	-0.279	0.0593	-0.0603	0.16	0.24	0.00578
3789	Q8NCN4	F7HG35	tr|F7HG35|F7HG35_MACMU	RNF169	-0.0967	0.0967	0.579	0.271	-0.292	0.944	-0.639	-0.405	NA	NA	NA	NA	NA	NA	NA	NA	NA	NA	NA
13216	Q8NCW5	F7H7C5	tr|F7H7C5|F7H7C5_MACMU	NAXE	0.248	0.0135	-0.114	0.32	0.245	-0.332	-0.127	0	-0.318	0.00404	-0.177	-0.0269	-0.0639	0.164	-0.123	0.112	0.0522	0.305	-0.252
6893	Q8ND56	F7E407	tr|F7E407|F7E407_MACMU	LSM14A	-0.842	0.041	-0.206	-0.041	-0.244	1.14	0.313	0.723	NA	NA	NA	NA	NA	NA	NA	NA	NA	NA	NA
14763	Q8NDC4	F7GDK5	tr|F7GDK5|F7GDK5_MACMU	MORN4	-0.0571	-0.165	0.699	-0.0946	0.15	0.0571	0.376	-0.136	NA	NA	NA	NA	NA	NA	NA	NA	NA	NA	NA
1171	Q8NDV3	F6TI87	tr|F6TI87|F6TI87_MACMU	SMC1B	0.214	0.776	0.0862	-0.0987	0.44	-0.466	-0.0862	-0.168	NA	NA	NA	NA	NA	NA	NA	NA	NA	NA	NA
273	Q8NDV7	F6TUM5	tr|F6TUM5|F6TUM5_MACMU	TNRC6A	NA	NA	NA	NA	NA	NA	NA	NA	0.0419	-0.407	0.603	0	-0.246	-0.16	0.325	NA	NA	NA	NA
8847	Q8NEF3	F7ASX5	tr|F7ASX5|F7ASX5_MACMU	CCDC112	NA	NA	NA	NA	NA	NA	NA	NA	0.59	-0.305	0	0.526	-0.392	-0.328	0.538	NA	NA	NA	NA
10929	Q8NEL0	F7EG13	tr|F7EG13|F7EG13_MACMU	CCDC54	NA	NA	NA	NA	NA	NA	NA	NA	NA	NA	NA	NA	NA	NA	NA	0.0979	-0.0979	-0.43	0.301
2898	Q8NER1	F6YS22	tr|F6YS22|F6YS22_MACMU	TRPV1	-0.0809	0.0142	0.12	-0.145	-0.0142	-0.229	0.099	0.148	NA	NA	NA	NA	NA	NA	NA	NA	NA	NA	NA
8988	Q8NES3	F7GN81	tr|F7GN81|F7GN81_MACMU	LFNG	0.035	-0.0659	0	-0.195	-0.0495	0.116	0.0125	-0.162	-0.0336	-0.253	-0.18	0.0141	-0.0117	0.0955	0.0267	-0.0771	0.261	0.182	0.0881
[truncated: 759 more rows]
